# Supplementary material
Source: publisher figshare collection journal article supplement (https://gsajournals.figshare.com/ndownloader/files/23715626)
Supplement: Supplementary file 1 [file 23715626]

## Sheet: High
CHROM	POS	REF	ALT	allele_set	aaf	call_rate	is_snp	is_indel	is_transition	nucl_diversity	num_called	num_het	num_hom_alt	num_hom_ref	ANN	Mutation type	Impact	Gene name	WBGene ID	Transcript?	Gene ID	Gene Type
V	16602777	C	[A]	{A, C}	0.0175439	1	TRUE	FALSE	FALSE	0.0347772	57	0	1	56	A	splice_donor_variant&intron_variant	HIGH	T03E6.8	WBGene00011397	transcript	T03E6.8.1	protein_coding
V	16607344	A	[T]	{A, T}	0.303571	0.982456	TRUE	FALSE	FALSE	0.426641	56	0	17	39	T	stop_gained	HIGH	Y32B12C.1	WBGene00012525	transcript	Y32B12C.1	protein_coding
V	16612418	C	[T]	{C, T}	0.0526316	1	TRUE	FALSE	TRUE	0.100605	57	0	3	54	T	stop_gained	HIGH	srw-54	WBGene00005801	transcript	Y32B12C.2a	protein_coding
V	16618384	G	[T]	{G, T}	0.0263158	1	TRUE	FALSE	FALSE	0.0517	57	1	1	55	T	stop_gained	HIGH	Y70C5A.3	WBGene00050904	transcript	Y70C5A.3	protein_coding
V	16618683	C	[A]	{A, C}	0.0526316	1	TRUE	FALSE	FALSE	0.100605	57	0	3	54	A	splice_donor_variant&intron_variant	HIGH	Y70C5A.3	WBGene00050904	transcript	Y70C5A.3	protein_coding
V	16618855	A	[C, G]	{A, C}	0.0175439	1	TRUE	FALSE	FALSE	0.0347772	57	0	1	56	C	stop_gained	HIGH	Y70C5A.3	WBGene00050904	transcript	Y70C5A.3	protein_coding
V	16619393	A	[T]	{A, T}	0.267857	0.982456	TRUE	FALSE	FALSE	0.395753	56	0	15	41	T	stop_gained	HIGH	Y70C5A.3	WBGene00050904	transcript	Y70C5A.3	protein_coding
V	16619581	G	[A, C]	{G, A}	0.321429	0.982456	TRUE	FALSE	FALSE	0.440154	56	0	18	38	C	stop_gained	HIGH	Y70C5A.3	WBGene00050904	transcript	Y70C5A.3	protein_coding
V	16626577	G	[T, A]	{G, A, T}	0.0818182	0.964912	TRUE	FALSE	FALSE	0.151626	55	1	4	50	T	stop_gained	HIGH	oac-53	WBGene00012308	transcript	W06G6.1	protein_coding
V	16634560	C	[T]	{C, T}	0.0175439	1	TRUE	FALSE	TRUE	0.0347772	57	0	1	56	T	splice_acceptor_variant&intron_variant	HIGH	srw-75	WBGene00005822	transcript	W06G6.13	pseudogene
V	16637844	CTA	[C]	{CTA, C}	0.0175439	1	FALSE	TRUE	FALSE	0.0347772	57	0	1	56	C	frameshift_variant	HIGH	srw-76	WBGene00005823	transcript	W06G6.6	protein_coding
V	16641851	A	[C, T]	{A, C}	0.240741	0.947368	TRUE	FALSE	FALSE	0.368986	54	0	13	41	C	stop_lost&splice_region_variant	HIGH	srw-77	WBGene00005824	transcript	W06G6.8	protein_coding
V	16643182	A	[T]	{A, T}	0.0181818	0.964912	TRUE	FALSE	FALSE	0.03603	55	0	1	54	T	stop_gained	HIGH	srw-77	WBGene00005824	transcript	W06G6.8	protein_coding
V	16645997	T	[A]	{A, T}	0.0892857	0.982456	TRUE	FALSE	FALSE	0.164093	56	0	5	51	A	stop_lost&splice_region_variant	HIGH	W06G6.9	WBGene00012311	transcript	W06G6.9	protein_coding
V	16648286	GT	[G]	{G, GT}	0.0350877	1	FALSE	TRUE	FALSE	0.0683124	57	0	2	55	G	frameshift_variant	HIGH	W06G6.20	WBGene00219308	transcript	W06G6.20.1	protein_coding	79/234	27/77		]]
V	16669386	TTCCAGGA	[T]	{T, TTCCAGGA}	0.0350877	1	FALSE	TRUE	FALSE	0.0683124	57	0	2	55	T	frameshift_variant	HIGH	str-61	WBGene00006125	transcript	F14F8.1	protein_coding
V	16674369	A	[G]	{G, A}	0.350877	1	TRUE	FALSE	TRUE	0.459556	57	0	20	37	G	splice_acceptor_variant&intron_variant	HIGH	srz-2	WBGene00008813	transcript	F14F8.2	pseudogene
V	16678651	CA	[C]	{CA, C}	0.0350877	1	FALSE	TRUE	FALSE	0.0683124	57	0	2	55	C	frameshift_variant	HIGH	srz-103	WBGene00008815	transcript	F14F8.4	protein_coding
V	16681932	GTCACTCA	[G]	{G, GTCACTCA}	0.0178571	0.982456	FALSE	TRUE	FALSE	0.0353925	56	0	1	55	G	frameshift_variant	HIGH	srw-44	WBGene00005791	transcript	F14F8.6	protein_coding
V	16681934	CACTCATT	[C]	{C, CACTCATT}	0.0535714	0.982456	FALSE	TRUE	FALSE	0.102317	56	0	3	53	C	frameshift_variant	HIGH	srw-44	WBGene00005791	transcript	F14F8.6	protein_coding
V	16683474	T	[A]	{A, T}	0.0357143	0.982456	TRUE	FALSE	FALSE	0.0694981	56	0	2	54	A	splice_donor_variant&intron_variant	HIGH	srw-36	WBGene00005783	transcript	F14F8.7	protein_coding
V	16683843	CA	[C]	{CA, C}	0.142857	0.982456	FALSE	TRUE	FALSE	0.247104	56	0	8	48	C	frameshift_variant	HIGH	srw-36	WBGene00005783	transcript	F14F8.7	protein_coding
V	16684094	T	[TTC]	{T, TTC}	0.04	0.877193	FALSE	TRUE	FALSE	0.0775758	50	0	2	48	TTC	frameshift_variant	HIGH	srw-36	WBGene00005783	transcript	F14F8.7	protein_coding
V	16684095	T	[TCG]	{T, TCG}	0.446429	0.982456	FALSE	TRUE	FALSE	0.498713	56	0	25	31	TCG	frameshift_variant	HIGH	srw-36	WBGene00005783	transcript	F14F8.7	protein_coding
V	16686568	T	[A]	{A, T}	0.140351	1	TRUE	FALSE	FALSE	0.24344	57	0	8	49	A	stop_gained	HIGH	srw-43	WBGene00005790	transcript	F14F8.5	protein_coding
V	16687893	C	[T]	{C, T}	0.0350877	1	TRUE	FALSE	TRUE	0.0683124	57	0	2	55	T	stop_gained	HIGH	srz-102	WBGene00023505	transcript	F14F8.13	protein_coding
V	16688971	C	[A]	{A, C}	0.0175439	1	TRUE	FALSE	FALSE	0.0347772	57	0	1	56	A	stop_gained	HIGH	srz-102	WBGene00023505	transcript	F14F8.13	protein_coding
V	16693622	TG	[T]	{TG, T}	0.0175439	1	FALSE	TRUE	FALSE	0.0347772	57	0	1	56	T	frameshift_variant	HIGH	srw-42	WBGene00005789	transcript	F14F8.11	protein_coding
V	16695057	A	[T]	{A, T}	0.0175439	1	TRUE	FALSE	FALSE	0.0347772	57	0	1	56	T	splice_acceptor_variant&intron_variant	HIGH	srz-101	WBGene00008818	transcript	F14F8.12	protein_coding
V	16695131	TC	[T]	{TC, T}	0.0175439	1	FALSE	TRUE	FALSE	0.0347772	57	0	1	56	T	frameshift_variant	HIGH	srz-101	WBGene00008818	transcript	F14F8.12	protein_coding
V	16696140	G	[GT]	{G, GT}	0.0178571	0.982456	FALSE	TRUE	FALSE	0.0353925	56	0	1	55	GT	frameshift_variant	HIGH	srz-101	WBGene00008818	transcript	F14F8.12	protein_coding
V	16704366	C	[T]	{C, T}	0.0701754	1	TRUE	FALSE	TRUE	0.131657	57	0	4	53	T	stop_gained	HIGH	Y70C5C.1	WBGene00013492	transcript	Y70C5C.1	protein_coding
V	16705347	CA	[C]	{CA, C}	0.0175439	1	FALSE	TRUE	FALSE	0.0347772	57	0	1	56	C	frameshift_variant	HIGH	clec-9	WBGene00013493	transcript	Y70C5C.2	protein_coding
V	16715836	G	[A]	{G, A}	0.0535714	0.982456	TRUE	FALSE	TRUE	0.102317	56	0	3	53	A	stop_gained	HIGH	srh-137	WBGene00005354	transcript	Y70C5C.4	protein_coding
V	16718772	G	[A]	{G, A}	0.0178571	0.982456	TRUE	FALSE	TRUE	0.0353925	56	0	1	55	A	splice_donor_variant&intron_variant	HIGH	clec-236	WBGene00013495	transcript	Y70C5C.5	pseudogene
V	16727319	GA	[G]	{G, GA}	0.0526316	1	FALSE	TRUE	FALSE	0.100605	57	0	3	54	G	frameshift_variant	HIGH	T25E12.14	WBGene00077622	transcript	T25E12.14	protein_coding
V	16733641	A	[T]	{A, T}	0.0701754	1	TRUE	FALSE	FALSE	0.131657	57	0	4	53	T	stop_gained	HIGH	T25E12.16	WBGene00194715	transcript	T25E12.16	protein_coding
V	16738070	G	[A]	{G, A}	0.0175439	1	TRUE	FALSE	TRUE	0.0347772	57	0	1	56	A	stop_gained	HIGH	clec-29	WBGene00012024	transcript	T25E12.9	protein_coding
V	16740863	AGG	[A]	{AGG, A}	0.0175439	1	FALSE	TRUE	FALSE	0.0347772	57	0	1	56	A	frameshift_variant	HIGH	clec-39	WBGene00012022	transcript	T25E12.7	protein_coding
V	16741156	G	[A]	{G, A}	0.0535714	0.982456	TRUE	FALSE	TRUE	0.102317	56	0	3	53	A	splice_donor_variant&intron_variant	HIGH	clec-39	WBGene00012022	transcript	T25E12.7	protein_coding
V	16745470	G	[GACT]	{G, GACT}	0.0175439	1	FALSE	TRUE	FALSE	0.0347772	57	0	1	56	GACT	stop_gained&conservative_inframe_insertion	HIGH	gyg-2	WBGene00012020	transcript	T25E12.5	protein_coding
V	16839666	C	[A]	{A, C}	0.245614	1	TRUE	FALSE	FALSE	0.373855	57	0	14	43	A	stop_gained	HIGH	clec-40	WBGene00011853	transcript	T20B3.13	protein_coding
V	16842163	C	[T]	{C, T}	0.22807	1	TRUE	FALSE	TRUE	0.355224	57	0	13	44	T	splice_donor_variant&intron_variant	HIGH	clec-23	WBGene00011851	transcript	T20B3.8	pseudogene
V	16844430	C	[T]	{C, T}	0.0175439	1	TRUE	FALSE	TRUE	0.0347772	57	0	1	56	T	stop_gained	HIGH	clec-25	WBGene00044331	transcript	T20B3.15	protein_coding
V	16847722	C	[A]	{A, C}	0.0803571	0.982456	TRUE	FALSE	FALSE	0.149131	56	3	3	50	A	stop_gained	HIGH	clec-36	WBGene00044332	transcript	T20B3.16	protein_coding
V	16850128	T	[C]	{C, T}	0.0892857	0.982456	TRUE	FALSE	TRUE	0.164093	56	0	5	51	C	stop_lost&splice_region_variant	HIGH	clec-26	WBGene00011852	transcript	T20B3.12	protein_coding
V	16851404	G	[A]	{G, A}	0.0175439	1	TRUE	FALSE	TRUE	0.0347772	57	0	1	56	A	stop_gained	HIGH	clec-37	WBGene00013609	transcript	Y102A5B.3	protein_coding
V	16852981	G	[GC]	{G, GC}	0.0714286	0.982456	FALSE	TRUE	FALSE	0.133848	56	2	3	51	GC	splice_donor_variant&intron_variant	HIGH	clec-35	WBGene00013608	transcript	Y102A5B.2b	protein_coding
V	16854051	C	[T]	{C, T}	0.122807	1	TRUE	FALSE	TRUE	0.217358	57	0	7	50	T	start_lost	HIGH	clec-35	WBGene00013608	transcript	Y102A5B.2b	protein_coding
V	16854052	A	[C]	{A, C}	0.122807	1	TRUE	FALSE	FALSE	0.217358	57	0	7	50	C	start_lost	HIGH	clec-35	WBGene00013608	transcript	Y102A5B.2b	protein_coding
V	16858729	G	[C]	{G, C}	0.0175439	1	TRUE	FALSE	FALSE	0.0347772	57	0	1	56	C	splice_donor_variant&intron_variant	HIGH	clec-22	WBGene00009855	transcript	F49A5.3	protein_coding
V	16860450	GC	[G]	{G, GC}	0.0454545	0.964912	FALSE	TRUE	FALSE	0.087573	55	1	2	52	G	frameshift_variant	HIGH	clec-32	WBGene00009860	transcript	F49A5.9	protein_coding
V	16862159	C	[A]	{A, C}	0.122807	1	TRUE	FALSE	FALSE	0.217358	57	0	7	50	A	stop_gained	HIGH	clec-24	WBGene00009856	transcript	F49A5.4b	protein_coding
V	16862356	AT	[A]	{AT, A}	0.0175439	1	FALSE	TRUE	FALSE	0.0347772	57	0	1	56	A	frameshift_variant	HIGH	clec-24	WBGene00009856	transcript	F49A5.4b	protein_coding
V	16862389	G	[C]	{G, C}	0.0175439	1	TRUE	FALSE	FALSE	0.0347772	57	0	1	56	C	splice_donor_variant&intron_variant	HIGH	clec-24	WBGene00009856	transcript	F49A5.4b	protein_coding
V	16863111	G	[A]	{G, A}	0.0175439	1	TRUE	FALSE	TRUE	0.0347772	57	0	1	56	A	stop_gained	HIGH	clec-24	WBGene00009856	transcript	F49A5.4b	protein_coding
V	16865980	T	[TTTA]	{TTTA, T}	0.45614	1	FALSE	TRUE	FALSE	0.500543	57	0	26	31	TTTA	splice_acceptor_variant&intron_variant	HIGH	clec-28	WBGene00009857	transcript	F49A5.5a	protein_coding
V	16868629	C	[G, A]	{A, C}	0.0175439	1	TRUE	FALSE	FALSE	0.0347772	57	0	1	56	A	splice_acceptor_variant&intron_variant	HIGH	clec-33	WBGene00009859	transcript	F49A5.7	protein_coding
V	16871030	AC	[A]	{AC, A}	0.140351	1	FALSE	TRUE	FALSE	0.24344	57	0	8	49	A	frameshift_variant	HIGH	thn-4	WBGene00009858	transcript	F49A5.6	protein_coding
V	16874467	TTATC	[T]	{TTATC, T}	0.0350877	1	FALSE	TRUE	FALSE	0.0683124	57	0	2	55	T	frameshift_variant	HIGH	srw-23	WBGene00005770	transcript	F49A5.8	protein_coding
V	16881974	G	[C]	{G, C}	0.0192308	0.912281	TRUE	FALSE	FALSE	0.0380881	52	0	1	51	C	stop_gained	HIGH	F09C6.11	WBGene00044181	transcript	F09C6.11b	protein_coding
V	16882114	A	[T]	{A, T}	0.368421	1	TRUE	FALSE	FALSE	0.469492	57	0	21	36	T	stop_gained	HIGH	F09C6.11	WBGene00044181	transcript	F09C6.11b	protein_coding
V	16882145	T	[G]	{G, T}	0.45614	1	TRUE	FALSE	FALSE	0.500543	57	0	26	31	G	start_lost	HIGH	F09C6.11	WBGene00044181	transcript	F09C6.11b	protein_coding
V	16889289	G	[A]	{G, A}	0.0350877	1	TRUE	FALSE	TRUE	0.0683124	57	0	2	55	A	start_lost	HIGH	fbxa-44	WBGene00008616	transcript	F09C6.2	protein_coding
V	16890531	T	[G]	{G, T}	0.0350877	1	TRUE	FALSE	FALSE	0.0683124	57	0	2	55	G	stop_gained	HIGH	fbxa-44	WBGene00008616	transcript	F09C6.2	protein_coding
V	16893913	A	[T]	{A, T}	0.0350877	1	TRUE	FALSE	FALSE	0.0683124	57	0	2	55	T	stop_gained	HIGH	F09C6.15	WBGene00077492	transcript	F09C6.15	protein_coding
V	16894435	A	[G]	{G, A}	0.0350877	1	TRUE	FALSE	TRUE	0.0683124	57	0	2	55	G	splice_donor_variant&intron_variant	HIGH	srp-9	WBGene00005650	transcript	F09C6.5	pseudogene
V	16898489	T	[TGACCA]	{TGACCA, T}	0.0178571	0.982456	FALSE	TRUE	FALSE	0.0353925	56	0	1	55	TGACCA	frameshift_variant	HIGH	fbxa-45	WBGene00008618	transcript	F09C6.6	protein_coding
V	16898633	C	[A]	{A, C}	0.0526316	1	TRUE	FALSE	FALSE	0.100605	57	0	3	54	A	stop_gained	HIGH	fbxa-45	WBGene00008618	transcript	F09C6.6	protein_coding
V	16899392	T	[A]	{A, T}	0.0350877	1	TRUE	FALSE	FALSE	0.0683124	57	0	2	55	A	stop_gained	HIGH	fbxa-45	WBGene00008618	transcript	F09C6.6	protein_coding
V	16901564	C	[T]	{C, T}	0.0175439	1	TRUE	FALSE	TRUE	0.0347772	57	0	1	56	T	splice_donor_variant&intron_variant	HIGH	srd-68	WBGene00005145	transcript	F09C6.7	protein_coding
V	16902632	C	[T]	{C, T}	0.0350877	1	TRUE	FALSE	TRUE	0.0683124	57	0	2	55	T	splice_donor_variant&intron_variant	HIGH	srd-68	WBGene00005145	transcript	F09C6.7	protein_coding
V	16905507	G	[A]	{G, A}	0.0175439	1	TRUE	FALSE	TRUE	0.0347772	57	0	1	56	A	splice_donor_variant&intron_variant	HIGH	nhr-262	WBGene00008619	transcript	F09C6.8	protein_coding
V	16906452	T	[A]	{A, T}	0.0350877	1	TRUE	FALSE	FALSE	0.0683124	57	0	2	55	A	stop_gained	HIGH	nhr-262	WBGene00008619	transcript	F09C6.8	protein_coding
V	16912738	GAA	[G]	{GAA, G}	0.0178571	0.982456	FALSE	TRUE	FALSE	0.0353925	56	0	1	55	G	frameshift_variant&splice_region_variant	HIGH	nhr-116	WBGene00003706	transcript	F09C6.9	protein_coding
V	16913179	C	[A]	{A, C}	0.0357143	0.982456	TRUE	FALSE	FALSE	0.0694981	56	0	2	54	A	stop_gained	HIGH	nhr-116	WBGene00003706	transcript	F09C6.9	protein_coding
V	16915792	G	[GC]	{G, GC}	0.0727273	0.964912	FALSE	TRUE	FALSE	0.136113	55	0	4	51	GC	frameshift_variant	HIGH	F09C6.10	WBGene00008620	transcript	F09C6.10	protein_coding
V	16915984	C	[A]	{A, C}	0.0181818	0.964912	TRUE	FALSE	FALSE	0.03603	55	0	1	54	A	splice_donor_variant&intron_variant	HIGH	F09C6.10	WBGene00008620	transcript	F09C6.10	protein_coding
V	16916160	A	[ATGT]	{ATGT, A}	0.0181818	0.964912	FALSE	TRUE	FALSE	0.03603	55	0	1	54	ATGT	start_lost&conservative_inframe_insertion	HIGH	F09C6.10	WBGene00008620	transcript	F09C6.10	protein_coding
V	16917273	T	[A]	{A, T}	0.0185185	0.947368	TRUE	FALSE	FALSE	0.0366909	54	0	1	53	A	stop_lost	HIGH	fbxa-206	WBGene00013610	transcript	Y102A5C.1	protein_coding
V	16917918	G	[T]	{G, T}	0.0555556	0.947368	TRUE	FALSE	FALSE	0.105919	54	0	3	51	T	stop_gained	HIGH	fbxa-206	WBGene00013610	transcript	Y102A5C.1	protein_coding
V	16918195	A	[C]	{A, C}	0.037037	0.947368	TRUE	FALSE	FALSE	0.0719972	54	0	2	52	C	splice_donor_variant&intron_variant	HIGH	fbxa-206	WBGene00013610	transcript	Y102A5C.1	protein_coding
V	16918196	C	[A]	{A, C}	0.037037	0.947368	TRUE	FALSE	FALSE	0.0719972	54	0	2	52	A	splice_donor_variant&intron_variant	HIGH	fbxa-206	WBGene00013610	transcript	Y102A5C.1	protein_coding
V	16919344	T	[A]	{A, T}	0.037037	0.947368	TRUE	FALSE	FALSE	0.0719972	54	0	2	52	A	splice_donor_variant&intron_variant	HIGH	Y102A5C.2	WBGene00013611	transcript	Y102A5C.2	protein_coding
V	16919445	TAG	[T]	{TAG, T}	0.0833333	0.947368	FALSE	TRUE	FALSE	0.154206	54	1	4	49	T	frameshift_variant	HIGH	Y102A5C.2	WBGene00013611	transcript	Y102A5C.2	protein_coding
V	16922637	CA	[C]	{CA, C}	0.0175439	1	FALSE	TRUE	FALSE	0.0347772	57	0	1	56	C	frameshift_variant	HIGH	Y102A5C.4	WBGene00013613	transcript	Y102A5C.4	protein_coding
V	16923163	G	[GA]	{G, GA}	0.0350877	1	FALSE	TRUE	FALSE	0.0683124	57	0	2	55	GA	frameshift_variant	HIGH	Y102A5C.4	WBGene00013613	transcript	Y102A5C.4	protein_coding
V	16957362	G	[A]	{G, A}	0.368421	1	TRUE	FALSE	TRUE	0.469492	57	0	21	36	A	stop_gained	HIGH	clec-239	WBGene00013621	transcript	Y102A5C.16	protein_coding
V	16972529	ATC	[A]	{A, ATC}	0.0438596	1	FALSE	TRUE	FALSE	0.0846142	57	1	2	54	A	frameshift_variant	HIGH	srh-119	WBGene00005338	transcript	Y102A5C.21	protein_coding
V	16973516	GC	[G]	{G, GC}	0.140351	1	FALSE	TRUE	FALSE	0.24344	57	0	8	49	G	frameshift_variant	HIGH	srh-119	WBGene00005338	transcript	Y102A5C.21	protein_coding
V	16973773	CT	[C]	{CT, C}	0.0363636	0.964912	FALSE	TRUE	FALSE	0.0707256	55	0	2	53	C	frameshift_variant	HIGH	srh-119	WBGene00005338	transcript	Y102A5C.21	protein_coding
V	16974017	A	[T]	{A, T}	0.0175439	1	TRUE	FALSE	FALSE	0.0347772	57	0	1	56	T	stop_gained	HIGH	srh-119	WBGene00005338	transcript	Y102A5C.21	protein_coding
V	16986676	G	[A, T]	{G, A}	0.0350877	1	TRUE	FALSE	FALSE	0.0683124	57	0	2	55	T	stop_gained	HIGH	Y102A5C.40	WBGene00077624	transcript	Y102A5C.40	protein_coding
V	16987135	T	[A]	{A, T}	0.0175439	1	TRUE	FALSE	FALSE	0.0347772	57	0	1	56	A	start_lost	HIGH	Y102A5C.40	WBGene00077624	transcript	Y102A5C.40	protein_coding

## Sheet: Moderate
CHROM	POS	REF	ALT	allele_set	aaf	call_rate	is_snp	is_indel	is_transition	nucl_diversity	num_called	num_het	num_hom_alt	num_hom_ref	ANN	Mutation type	Impact	Gene name	WBGene ID	Transcript?	Gene ID	Gene Type
V	16601880	C	[G, T]	{G, C}	0.0701754	1	TRUE	FALSE	FALSE	0.131657	57	0	4	53	G	missense_variant	MODERATE	T03E6.8	WBGene00011397	transcript	T03E6.8.1	protein_coding
V	16601928	T	[C]	{C, T}	0.0350877	1	TRUE	FALSE	TRUE	0.0683124	57	0	2	55	C	missense_variant	MODERATE	T03E6.8	WBGene00011397	transcript	T03E6.8.1	protein_coding
V	16601947	G	[A]	{G, A}	0.122807	1	TRUE	FALSE	TRUE	0.217358	57	0	7	50	A	missense_variant	MODERATE	T03E6.8	WBGene00011397	transcript	T03E6.8.1	protein_coding
V	16601948	C	[T]	{C, T}	0.192982	1	TRUE	FALSE	TRUE	0.314237	57	0	11	46	T	missense_variant	MODERATE	T03E6.8	WBGene00011397	transcript	T03E6.8.1	protein_coding
V	16601969	A	[T]	{A, T}	0.263158	1	TRUE	FALSE	FALSE	0.391244	57	0	15	42	T	missense_variant	MODERATE	T03E6.8	WBGene00011397	transcript	T03E6.8.1	protein_coding
V	16601971	A	[T]	{A, T}	0.263158	1	TRUE	FALSE	FALSE	0.391244	57	0	15	42	T	missense_variant	MODERATE	T03E6.8	WBGene00011397	transcript	T03E6.8.1	protein_coding
V	16601972	A	[G]	{G, A}	0.122807	1	TRUE	FALSE	TRUE	0.217358	57	0	7	50	G	missense_variant	MODERATE	T03E6.8	WBGene00011397	transcript	T03E6.8.1	protein_coding
V	16601978	A	[T]	{A, T}	0.122807	1	TRUE	FALSE	FALSE	0.217358	57	0	7	50	T	missense_variant	MODERATE	T03E6.8	WBGene00011397	transcript	T03E6.8.1	protein_coding
V	16601988	T	[G]	{G, T}	0.0701754	1	TRUE	FALSE	FALSE	0.131657	57	0	4	53	G	missense_variant	MODERATE	T03E6.8	WBGene00011397	transcript	T03E6.8.1	protein_coding
V	16601996	A	[G]	{G, A}	0.263158	1	TRUE	FALSE	TRUE	0.391244	57	0	15	42	G	missense_variant	MODERATE	T03E6.8	WBGene00011397	transcript	T03E6.8.1	protein_coding
V	16601997	C	[T, G]	{G, C, T}	0.140351	1	TRUE	FALSE	FALSE	0.24344	57	0	8	49	G	missense_variant	MODERATE	T03E6.8	WBGene00011397	transcript	T03E6.8.1	protein_coding
V	16602032	G	[A, T]	{G, A}	0.192982	1	TRUE	FALSE	FALSE	0.314237	57	0	11	46	T	missense_variant	MODERATE	T03E6.8	WBGene00011397	transcript	T03E6.8.1	protein_coding
V	16602038	C	[T]	{C, T}	0.0526316	1	TRUE	FALSE	TRUE	0.100605	57	0	3	54	T	missense_variant	MODERATE	T03E6.8	WBGene00011397	transcript	T03E6.8.1	protein_coding
V	16602056	G	[A]	{G, A}	0.0701754	1	TRUE	FALSE	TRUE	0.131657	57	0	4	53	A	missense_variant	MODERATE	T03E6.8	WBGene00011397	transcript	T03E6.8.1	protein_coding
V	16602514	A	[G]	{G, A}	0.122807	1	TRUE	FALSE	TRUE	0.217358	57	0	7	50	G	missense_variant	MODERATE	T03E6.8	WBGene00011397	transcript	T03E6.8.1	protein_coding
V	16602531	C	[G, T]	{G, C, T}	0.192982	1	TRUE	FALSE	FALSE	0.314237	57	0	11	46	G	missense_variant	MODERATE	T03E6.8	WBGene00011397	transcript	T03E6.8.1	protein_coding
V	16602539	G	[A]	{G, A}	0.0526316	1	TRUE	FALSE	TRUE	0.100605	57	0	3	54	A	missense_variant	MODERATE	T03E6.8	WBGene00011397	transcript	T03E6.8.1	protein_coding
V	16602560	T	[A]	{A, T}	0.0701754	1	TRUE	FALSE	FALSE	0.131657	57	0	4	53	A	missense_variant	MODERATE	T03E6.8	WBGene00011397	transcript	T03E6.8.1	protein_coding
V	16602620	C	[T]	{C, T}	0.122807	1	TRUE	FALSE	TRUE	0.217358	57	0	7	50	T	missense_variant	MODERATE	T03E6.8	WBGene00011397	transcript	T03E6.8.1	protein_coding
V	16602631	A	[G]	{G, A}	0.0701754	1	TRUE	FALSE	TRUE	0.131657	57	0	4	53	G	missense_variant	MODERATE	T03E6.8	WBGene00011397	transcript	T03E6.8.1	protein_coding
V	16602644	T	[G]	{G, T}	0.245614	1	TRUE	FALSE	FALSE	0.373855	57	0	14	43	G	missense_variant	MODERATE	T03E6.8	WBGene00011397	transcript	T03E6.8.1	protein_coding
V	16602782	G	[A]	{G, A}	0.192982	1	TRUE	FALSE	TRUE	0.314237	57	0	11	46	A	missense_variant	MODERATE	T03E6.8	WBGene00011397	transcript	T03E6.8.1	protein_coding
V	16602817	A	[G]	{G, A}	0.0175439	1	TRUE	FALSE	TRUE	0.0347772	57	0	1	56	G	missense_variant	MODERATE	T03E6.8	WBGene00011397	transcript	T03E6.8.1	protein_coding
V	16602848	C	[T]	{C, T}	0.0526316	1	TRUE	FALSE	TRUE	0.100605	57	0	3	54	T	missense_variant	MODERATE	T03E6.8	WBGene00011397	transcript	T03E6.8.1	protein_coding
V	16602860	T	[C]	{C, T}	0.122807	1	TRUE	FALSE	TRUE	0.217358	57	0	7	50	C	missense_variant	MODERATE	T03E6.8	WBGene00011397	transcript	T03E6.8.1	protein_coding
V	16602865	G	[A]	{G, A}	0.0701754	1	TRUE	FALSE	TRUE	0.131657	57	0	4	53	A	missense_variant	MODERATE	T03E6.8	WBGene00011397	transcript	T03E6.8.1	protein_coding
V	16602880	A	[G]	{G, A}	0.0175439	1	TRUE	FALSE	TRUE	0.0347772	57	0	1	56	G	missense_variant	MODERATE	T03E6.8	WBGene00011397	transcript	T03E6.8.1	protein_coding
V	16602890	A	[T, C]	{A, T}	0.192982	1	TRUE	FALSE	FALSE	0.314237	57	0	11	46	C	missense_variant	MODERATE	T03E6.8	WBGene00011397	transcript	T03E6.8.1	protein_coding
V	16602901	A	[G]	{G, A}	0.122807	1	TRUE	FALSE	TRUE	0.217358	57	0	7	50	G	missense_variant	MODERATE	T03E6.8	WBGene00011397	transcript	T03E6.8.1	protein_coding
V	16602947	A	[T]	{A, T}	0.0526316	1	TRUE	FALSE	FALSE	0.100605	57	0	3	54	T	missense_variant	MODERATE	T03E6.8	WBGene00011397	transcript	T03E6.8.1	protein_coding
V	16606626	C	[A]	{A, C}	0.0178571	0.982456	TRUE	FALSE	FALSE	0.0353925	56	0	1	55	A	missense_variant	MODERATE	Y32B12C.1	WBGene00012525	transcript	Y32B12C.1	protein_coding
V	16606632	A	[T]	{A, T}	0.0178571	0.982456	TRUE	FALSE	FALSE	0.0353925	56	0	1	55	T	missense_variant	MODERATE	Y32B12C.1	WBGene00012525	transcript	Y32B12C.1	protein_coding
V	16606712	A	[G]	{G, A}	0.0178571	0.982456	TRUE	FALSE	TRUE	0.0353925	56	0	1	55	G	missense_variant	MODERATE	Y32B12C.1	WBGene00012525	transcript	Y32B12C.1	protein_coding
V	16606894	G	[C]	{G, C}	0.0357143	0.982456	TRUE	FALSE	FALSE	0.0694981	56	0	2	54	C	missense_variant	MODERATE	Y32B12C.1	WBGene00012525	transcript	Y32B12C.1	protein_coding
V	16606900	A	[G]	{G, A}	0.0357143	0.982456	TRUE	FALSE	TRUE	0.0694981	56	0	2	54	G	missense_variant	MODERATE	Y32B12C.1	WBGene00012525	transcript	Y32B12C.1	protein_coding
V	16606918	T	[A]	{A, T}	0.0357143	0.982456	TRUE	FALSE	FALSE	0.0694981	56	0	2	54	A	missense_variant	MODERATE	Y32B12C.1	WBGene00012525	transcript	Y32B12C.1	protein_coding
V	16606935	A	[G]	{G, A}	0.0178571	0.982456	TRUE	FALSE	TRUE	0.0353925	56	0	1	55	G	missense_variant	MODERATE	Y32B12C.1	WBGene00012525	transcript	Y32B12C.1	protein_coding
V	16606938	A	[G]	{G, A}	0.0178571	0.982456	TRUE	FALSE	TRUE	0.0353925	56	0	1	55	G	missense_variant	MODERATE	Y32B12C.1	WBGene00012525	transcript	Y32B12C.1	protein_coding
V	16606941	A	[G]	{G, A}	0.0178571	0.982456	TRUE	FALSE	TRUE	0.0353925	56	0	1	55	G	missense_variant	MODERATE	Y32B12C.1	WBGene00012525	transcript	Y32B12C.1	protein_coding
V	16606947	G	[A]	{G, A}	0.0178571	0.982456	TRUE	FALSE	TRUE	0.0353925	56	0	1	55	A	missense_variant	MODERATE	Y32B12C.1	WBGene00012525	transcript	Y32B12C.1	protein_coding
V	16606952	C	[A]	{A, C}	0.0178571	0.982456	TRUE	FALSE	FALSE	0.0353925	56	0	1	55	A	missense_variant	MODERATE	Y32B12C.1	WBGene00012525	transcript	Y32B12C.1	protein_coding
V	16606980	G	[A]	{G, A}	0.0357143	0.982456	TRUE	FALSE	TRUE	0.0694981	56	0	2	54	A	missense_variant	MODERATE	Y32B12C.1	WBGene00012525	transcript	Y32B12C.1	protein_coding
V	16606990	A	[C]	{A, C}	0.0357143	0.982456	TRUE	FALSE	FALSE	0.0694981	56	0	2	54	C	missense_variant	MODERATE	Y32B12C.1	WBGene00012525	transcript	Y32B12C.1	protein_coding
V	16607003	A	[C]	{A, C}	0.0178571	0.982456	TRUE	FALSE	FALSE	0.0353925	56	0	1	55	C	missense_variant	MODERATE	Y32B12C.1	WBGene00012525	transcript	Y32B12C.1	protein_coding
V	16607074	G	[T]	{G, T}	0.339286	0.982456	TRUE	FALSE	FALSE	0.452381	56	0	19	37	T	missense_variant	MODERATE	Y32B12C.1	WBGene00012525	transcript	Y32B12C.1	protein_coding
V	16607081	T	[C]	{C, T}	0.0178571	0.982456	TRUE	FALSE	TRUE	0.0353925	56	0	1	55	C	missense_variant	MODERATE	Y32B12C.1	WBGene00012525	transcript	Y32B12C.1	protein_coding
V	16607092	A	[T]	{A, T}	0.0178571	0.982456	TRUE	FALSE	FALSE	0.0353925	56	0	1	55	T	missense_variant	MODERATE	Y32B12C.1	WBGene00012525	transcript	Y32B12C.1	protein_coding
V	16607098	G	[A]	{G, A}	0.0178571	0.982456	TRUE	FALSE	TRUE	0.0353925	56	0	1	55	A	missense_variant	MODERATE	Y32B12C.1	WBGene00012525	transcript	Y32B12C.1	protein_coding
V	16607109	T	[A]	{A, T}	0.0178571	0.982456	TRUE	FALSE	FALSE	0.0353925	56	0	1	55	A	missense_variant	MODERATE	Y32B12C.1	WBGene00012525	transcript	Y32B12C.1	protein_coding
V	16607153	A	[T]	{A, T}	0.0178571	0.982456	TRUE	FALSE	FALSE	0.0353925	56	0	1	55	T	missense_variant	MODERATE	Y32B12C.1	WBGene00012525	transcript	Y32B12C.1	protein_coding
V	16607154	C	[G]	{G, C}	0.0178571	0.982456	TRUE	FALSE	FALSE	0.0353925	56	0	1	55	G	missense_variant	MODERATE	Y32B12C.1	WBGene00012525	transcript	Y32B12C.1	protein_coding
V	16607191	G	[A]	{G, A}	0.0178571	0.982456	TRUE	FALSE	TRUE	0.0353925	56	0	1	55	A	missense_variant	MODERATE	Y32B12C.1	WBGene00012525	transcript	Y32B12C.1	protein_coding
V	16607196	C	[A]	{A, C}	0.0178571	0.982456	TRUE	FALSE	FALSE	0.0353925	56	0	1	55	A	missense_variant	MODERATE	Y32B12C.1	WBGene00012525	transcript	Y32B12C.1	protein_coding
V	16607203	G	[T]	{G, T}	0.321429	0.982456	TRUE	FALSE	FALSE	0.440154	56	0	18	38	T	missense_variant	MODERATE	Y32B12C.1	WBGene00012525	transcript	Y32B12C.1	protein_coding
V	16607212	C	[G]	{G, C}	0.0267857	0.982456	TRUE	FALSE	FALSE	0.0526062	56	1	1	54	G	missense_variant	MODERATE	Y32B12C.1	WBGene00012525	transcript	Y32B12C.1	protein_coding
V	16607215	A	[G]	{G, A}	0.0178571	0.982456	TRUE	FALSE	TRUE	0.0353925	56	0	1	55	G	missense_variant	MODERATE	Y32B12C.1	WBGene00012525	transcript	Y32B12C.1	protein_coding
V	16607216	T	[A]	{A, T}	0.0178571	0.982456	TRUE	FALSE	FALSE	0.0353925	56	0	1	55	A	missense_variant	MODERATE	Y32B12C.1	WBGene00012525	transcript	Y32B12C.1	protein_coding
V	16607253	T	[G]	{G, T}	0.0178571	0.982456	TRUE	FALSE	FALSE	0.0353925	56	0	1	55	G	missense_variant	MODERATE	Y32B12C.1	WBGene00012525	transcript	Y32B12C.1	protein_coding
V	16607255	A	[C]	{A, C}	0.0178571	0.982456	TRUE	FALSE	FALSE	0.0353925	56	0	1	55	C	missense_variant	MODERATE	Y32B12C.1	WBGene00012525	transcript	Y32B12C.1	protein_coding
V	16607332	A	[G]	{G, A}	0.303571	0.982456	TRUE	FALSE	TRUE	0.426641	56	0	17	39	G	missense_variant	MODERATE	Y32B12C.1	WBGene00012525	transcript	Y32B12C.1	protein_coding
V	16607345	G	[A]	{G, A}	0.303571	0.982456	TRUE	FALSE	TRUE	0.426641	56	0	17	39	A	missense_variant	MODERATE	Y32B12C.1	WBGene00012525	transcript	Y32B12C.1	protein_coding
V	16607346	A	[T]	{A, T}	0.303571	0.982456	TRUE	FALSE	FALSE	0.426641	56	0	17	39	T	missense_variant	MODERATE	Y32B12C.1	WBGene00012525	transcript	Y32B12C.1	protein_coding
V	16607899	A	[G]	{G, A}	0.303571	0.982456	TRUE	FALSE	TRUE	0.426641	56	0	17	39	G	missense_variant	MODERATE	Y32B12C.1	WBGene00012525	transcript	Y32B12C.1	protein_coding
V	16607908	A	[G]	{G, A}	0.303571	0.982456	TRUE	FALSE	TRUE	0.426641	56	0	17	39	G	missense_variant	MODERATE	Y32B12C.1	WBGene00012525	transcript	Y32B12C.1	protein_coding
V	16607909	G	[A]	{G, A}	0.303571	0.982456	TRUE	FALSE	TRUE	0.426641	56	0	17	39	A	missense_variant	MODERATE	Y32B12C.1	WBGene00012525	transcript	Y32B12C.1	protein_coding
V	16607910	A	[T]	{A, T}	0.303571	0.982456	TRUE	FALSE	FALSE	0.426641	56	0	17	39	T	missense_variant	MODERATE	Y32B12C.1	WBGene00012525	transcript	Y32B12C.1	protein_coding
V	16607911	A	[T]	{A, T}	0.303571	0.982456	TRUE	FALSE	FALSE	0.426641	56	0	17	39	T	missense_variant	MODERATE	Y32B12C.1	WBGene00012525	transcript	Y32B12C.1	protein_coding
V	16607918	C	[G]	{G, C}	0.303571	0.982456	TRUE	FALSE	FALSE	0.426641	56	0	17	39	G	missense_variant	MODERATE	Y32B12C.1	WBGene00012525	transcript	Y32B12C.1	protein_coding
V	16607925	T	[A]	{A, T}	0.303571	0.982456	TRUE	FALSE	FALSE	0.426641	56	0	17	39	A	missense_variant	MODERATE	Y32B12C.1	WBGene00012525	transcript	Y32B12C.1	protein_coding
V	16611356	T	[A]	{A, T}	0.105263	1	TRUE	FALSE	FALSE	0.190033	57	0	6	51	A	missense_variant	MODERATE	srw-54	WBGene00005801	transcript	Y32B12C.2a	protein_coding
V	16611369	G	[A]	{G, A}	0.105263	1	TRUE	FALSE	TRUE	0.190033	57	0	6	51	A	missense_variant	MODERATE	srw-54	WBGene00005801	transcript	Y32B12C.2a	protein_coding
V	16611375	G	[C]	{G, C}	0.105263	1	TRUE	FALSE	FALSE	0.190033	57	0	6	51	C	missense_variant	MODERATE	srw-54	WBGene00005801	transcript	Y32B12C.2a	protein_coding
V	16611383	G	[A]	{G, A}	0.105263	1	TRUE	FALSE	TRUE	0.190033	57	0	6	51	A	missense_variant	MODERATE	srw-54	WBGene00005801	transcript	Y32B12C.2a	protein_coding
V	16611384	A	[C]	{A, C}	0.105263	1	TRUE	FALSE	FALSE	0.190033	57	0	6	51	C	missense_variant	MODERATE	srw-54	WBGene00005801	transcript	Y32B12C.2a	protein_coding
V	16611391	A	[T]	{A, T}	0.105263	1	TRUE	FALSE	FALSE	0.190033	57	0	6	51	T	missense_variant	MODERATE	srw-54	WBGene00005801	transcript	Y32B12C.2a	protein_coding
V	16611426	G	[T, C]	{G, T}	0.105263	1	TRUE	FALSE	FALSE	0.190033	57	0	6	51	C	missense_variant	MODERATE	srw-54	WBGene00005801	transcript	Y32B12C.2a	protein_coding
V	16611454	C	[A]	{A, C}	0.298246	1	TRUE	FALSE	FALSE	0.422295	57	0	17	40	A	missense_variant	MODERATE	srw-54	WBGene00005801	transcript	Y32B12C.2a	protein_coding
V	16611479	G	[A]	{G, A}	0.105263	1	TRUE	FALSE	TRUE	0.190033	57	0	6	51	A	missense_variant	MODERATE	srw-54	WBGene00005801	transcript	Y32B12C.2a	protein_coding
V	16611546	C	[T]	{C, T}	0.105263	1	TRUE	FALSE	TRUE	0.190033	57	0	6	51	T	missense_variant	MODERATE	srw-54	WBGene00005801	transcript	Y32B12C.2a	protein_coding
V	16611556	G	[C]	{G, C}	0.105263	1	TRUE	FALSE	FALSE	0.190033	57	0	6	51	C	missense_variant	MODERATE	srw-54	WBGene00005801	transcript	Y32B12C.2a	protein_coding
V	16611635	A	[G]	{G, A}	0.105263	1	TRUE	FALSE	TRUE	0.190033	57	0	6	51	G	missense_variant	MODERATE	srw-54	WBGene00005801	transcript	Y32B12C.2a	protein_coding
V	16611709	C	[T]	{C, T}	0.122807	1	TRUE	FALSE	TRUE	0.217358	57	0	7	50	T	missense_variant	MODERATE	srw-54	WBGene00005801	transcript	Y32B12C.2a	protein_coding
V	16612076	C	[T]	{C, T}	0.127273	0.964912	TRUE	FALSE	TRUE	0.224187	55	0	7	48	T	missense_variant	MODERATE	srw-54	WBGene00005801	transcript	Y32B12C.2a	protein_coding
V	16612100	G	[A]	{G, A}	0.105263	1	TRUE	FALSE	TRUE	0.190033	57	0	6	51	A	missense_variant	MODERATE	srw-54	WBGene00005801	transcript	Y32B12C.2a	protein_coding
V	16612139	G	[T]	{G, T}	0.105263	1	TRUE	FALSE	FALSE	0.190033	57	0	6	51	T	missense_variant	MODERATE	srw-54	WBGene00005801	transcript	Y32B12C.2a	protein_coding
V	16612178	G	[A]	{G, A}	0.105263	1	TRUE	FALSE	TRUE	0.190033	57	0	6	51	A	missense_variant	MODERATE	srw-54	WBGene00005801	transcript	Y32B12C.2a	protein_coding
V	16612194	T	[A]	{A, T}	0.105263	1	TRUE	FALSE	FALSE	0.190033	57	0	6	51	A	missense_variant	MODERATE	srw-54	WBGene00005801	transcript	Y32B12C.2a	protein_coding
V	16612266	T	[C]	{C, T}	0.122807	1	TRUE	FALSE	TRUE	0.217358	57	2	6	49	C	missense_variant	MODERATE	srw-54	WBGene00005801	transcript	Y32B12C.2a	protein_coding
V	16612283	A	[G]	{G, A}	0.0701754	1	TRUE	FALSE	TRUE	0.131657	57	4	2	51	G	missense_variant	MODERATE	srw-54	WBGene00005801	transcript	Y32B12C.2a	protein_coding
V	16612368	C	[T]	{C, T}	0.140351	1	TRUE	FALSE	TRUE	0.24344	57	0	8	49	T	missense_variant	MODERATE	srw-54	WBGene00005801	transcript	Y32B12C.2a	protein_coding
V	16612812	A	[G]	{G, A}	0.105263	1	TRUE	FALSE	TRUE	0.190033	57	0	6	51	G	missense_variant	MODERATE	Y32B12C.3	WBGene00012526	transcript	Y32B12C.3	protein_coding
V	16612829	C	[T]	{C, T}	0.105263	1	TRUE	FALSE	TRUE	0.190033	57	0	6	51	T	missense_variant	MODERATE	Y32B12C.3	WBGene00012526	transcript	Y32B12C.3	protein_coding
V	16612875	C	[T]	{C, T}	0.105263	1	TRUE	FALSE	TRUE	0.190033	57	0	6	51	T	missense_variant	MODERATE	Y32B12C.3	WBGene00012526	transcript	Y32B12C.3	protein_coding
V	16612896	C	[T]	{C, T}	0.0526316	1	TRUE	FALSE	TRUE	0.100605	57	0	3	54	T	missense_variant	MODERATE	Y32B12C.3	WBGene00012526	transcript	Y32B12C.3	protein_coding
V	16612932	T	[G, A]	{G, T}	0.105263	1	TRUE	FALSE	FALSE	0.190033	57	0	6	51	A	missense_variant	MODERATE	Y32B12C.3	WBGene00012526	transcript	Y32B12C.3	protein_coding
V	16612938	A	[G]	{G, A}	0.105263	1	TRUE	FALSE	TRUE	0.190033	57	0	6	51	G	missense_variant	MODERATE	Y32B12C.3	WBGene00012526	transcript	Y32B12C.3	protein_coding
V	16612955	A	[T]	{A, T}	0.105263	1	TRUE	FALSE	FALSE	0.190033	57	0	6	51	T	missense_variant	MODERATE	Y32B12C.3	WBGene00012526	transcript	Y32B12C.3	protein_coding
V	16612983	C	[T]	{C, T}	0.122807	1	TRUE	FALSE	TRUE	0.217358	57	0	7	50	T	missense_variant	MODERATE	Y32B12C.3	WBGene00012526	transcript	Y32B12C.3	protein_coding
V	16613015	C	[T]	{C, T}	0.0175439	1	TRUE	FALSE	TRUE	0.0347772	57	0	1	56	T	missense_variant	MODERATE	Y32B12C.3	WBGene00012526	transcript	Y32B12C.3	protein_coding
V	16613127	G	[A]	{G, A}	0.105263	1	TRUE	FALSE	TRUE	0.190033	57	0	6	51	A	missense_variant	MODERATE	Y32B12C.3	WBGene00012526	transcript	Y32B12C.3	protein_coding
V	16613149	C	[T]	{C, T}	0.105263	1	TRUE	FALSE	TRUE	0.190033	57	0	6	51	T	missense_variant	MODERATE	Y32B12C.3	WBGene00012526	transcript	Y32B12C.3	protein_coding
V	16613168	T	[A, G]	{A, T}	0.105263	1	TRUE	FALSE	FALSE	0.190033	57	0	6	51	A	missense_variant	MODERATE	Y32B12C.3	WBGene00012526	transcript	Y32B12C.3	protein_coding
V	16613179	C	[T]	{C, T}	0.105263	1	TRUE	FALSE	TRUE	0.190033	57	0	6	51	T	missense_variant	MODERATE	Y32B12C.3	WBGene00012526	transcript	Y32B12C.3	protein_coding
V	16613202	C	[T]	{C, T}	0.105263	1	TRUE	FALSE	TRUE	0.190033	57	0	6	51	T	missense_variant	MODERATE	Y32B12C.3	WBGene00012526	transcript	Y32B12C.3	protein_coding
V	16613222	G	[T, C, A]	{G, T}	0.0877193	1	TRUE	FALSE	FALSE	0.161466	57	2	4	51	C	missense_variant	MODERATE	Y32B12C.3	WBGene00012526	transcript	Y32B12C.3	protein_coding
V	16613253	T	[C, A]	{A, C, T}	0.0789474	1	TRUE	FALSE	FALSE	0.146716	57	5	2	50	A	missense_variant	MODERATE	Y32B12C.3	WBGene00012526	transcript	Y32B12C.3	protein_coding
V	16613295	C	[T]	{C, T}	0.0614035	1	TRUE	FALSE	TRUE	0.116286	57	5	1	51	T	missense_variant	MODERATE	Y32B12C.3	WBGene00012526	transcript	Y32B12C.3	protein_coding
V	16613307	G	[A]	{G, A}	0.114035	1	TRUE	FALSE	TRUE	0.20385	57	5	4	48	A	missense_variant	MODERATE	Y32B12C.3	WBGene00012526	transcript	Y32B12C.3	protein_coding
V	16613368	C	[T]	{C, T}	0.105263	1	TRUE	FALSE	TRUE	0.190033	57	0	6	51	T	missense_variant	MODERATE	Y32B12C.3	WBGene00012526	transcript	Y32B12C.3	protein_coding
V	16613376	T	[C]	{C, T}	0.105263	1	TRUE	FALSE	TRUE	0.190033	57	0	6	51	C	missense_variant	MODERATE	Y32B12C.3	WBGene00012526	transcript	Y32B12C.3	protein_coding
V	16613418	G	[A]	{G, A}	0.0789474	1	TRUE	FALSE	TRUE	0.146716	57	3	3	51	A	missense_variant	MODERATE	Y32B12C.3	WBGene00012526	transcript	Y32B12C.3	protein_coding
V	16613423	T	[C, A]	{A, C, T}	0.0789474	1	TRUE	FALSE	FALSE	0.146716	57	3	3	51	A	missense_variant	MODERATE	Y32B12C.3	WBGene00012526	transcript	Y32B12C.3	protein_coding
V	16613434	C	[A]	{A, C}	0.105263	1	TRUE	FALSE	FALSE	0.190033	57	0	6	51	A	missense_variant	MODERATE	Y32B12C.3	WBGene00012526	transcript	Y32B12C.3	protein_coding
V	16613479	C	[T]	{C, T}	0.105263	1	TRUE	FALSE	TRUE	0.190033	57	0	6	51	T	missense_variant	MODERATE	Y32B12C.3	WBGene00012526	transcript	Y32B12C.3	protein_coding
V	16613543	T	[G]	{G, T}	0.0964912	1	TRUE	FALSE	FALSE	0.175904	57	5	3	49	G	missense_variant	MODERATE	Y32B12C.3	WBGene00012526	transcript	Y32B12C.3	protein_coding
V	16613580	C	[A, T, G]	{C, T}	0.107143	0.982456	TRUE	FALSE	FALSE	0.19305	56	0	6	50	A	missense_variant	MODERATE	Y32B12C.3	WBGene00012526	transcript	Y32B12C.3	protein_coding
V	16613621	T	[A]	{A, T}	0.0892857	0.982456	TRUE	FALSE	FALSE	0.164093	56	2	4	50	A	missense_variant	MODERATE	Y32B12C.3	WBGene00012526	transcript	Y32B12C.3	protein_coding
V	16613659	C	[T]	{C, T}	0.107143	0.982456	TRUE	FALSE	TRUE	0.19305	56	0	6	50	T	missense_variant	MODERATE	Y32B12C.3	WBGene00012526	transcript	Y32B12C.3	protein_coding
V	16613666	T	[G]	{G, T}	0.107143	0.982456	TRUE	FALSE	FALSE	0.19305	56	0	6	50	G	missense_variant	MODERATE	Y32B12C.3	WBGene00012526	transcript	Y32B12C.3	protein_coding
V	16613730	T	[A]	{A, T}	0.117647	0.894737	TRUE	FALSE	FALSE	0.209668	51	0	6	45	A	missense_variant	MODERATE	Y32B12C.3	WBGene00012526	transcript	Y32B12C.3	protein_coding
V	16613736	T	[C]	{C, T}	0.117647	0.894737	TRUE	FALSE	TRUE	0.209668	51	0	6	45	C	missense_variant	MODERATE	Y32B12C.3	WBGene00012526	transcript	Y32B12C.3	protein_coding
V	16613752	C	[T]	{C, T}	0.117647	0.894737	TRUE	FALSE	TRUE	0.209668	51	0	6	45	T	missense_variant	MODERATE	Y32B12C.3	WBGene00012526	transcript	Y32B12C.3	protein_coding
V	16613767	C	[T]	{C, T}	0.117647	0.894737	TRUE	FALSE	TRUE	0.209668	51	0	6	45	T	missense_variant	MODERATE	Y32B12C.3	WBGene00012526	transcript	Y32B12C.3	protein_coding
V	16613791	A	[C]	{A, C}	0.107843	0.894737	TRUE	FALSE	FALSE	0.194331	51	1	5	45	C	missense_variant	MODERATE	Y32B12C.3	WBGene00012526	transcript	Y32B12C.3	protein_coding
V	16613824	C	[T]	{C, T}	0.0196078	0.894737	TRUE	FALSE	TRUE	0.0388274	51	0	1	50	T	missense_variant	MODERATE	Y32B12C.3	WBGene00012526	transcript	Y32B12C.3	protein_coding
V	16613942	A	[G]	{G, A}	0.12	0.877193	TRUE	FALSE	TRUE	0.213333	50	0	6	44	G	missense_variant	MODERATE	Y32B12C.3	WBGene00012526	transcript	Y32B12C.3	protein_coding
V	16613951	A	[G]	{G, A}	0.12	0.877193	TRUE	FALSE	TRUE	0.213333	50	0	6	44	G	missense_variant	MODERATE	Y32B12C.3	WBGene00012526	transcript	Y32B12C.3	protein_coding
V	16614195	C	[A, G]	{A, C}	0.134615	0.912281	TRUE	FALSE	FALSE	0.23525	52	0	7	45	A	missense_variant	MODERATE	Y32B12C.3	WBGene00012526	transcript	Y32B12C.3	protein_coding
V	16614206	A	[C, G]	{A, C}	0.0865385	0.912281	TRUE	FALSE	FALSE	0.159634	52	1	4	47	C	missense_variant	MODERATE	Y32B12C.3	WBGene00012526	transcript	Y32B12C.3	protein_coding
V	16614226	G	[C]	{G, C}	0.105769	0.912281	TRUE	FALSE	FALSE	0.191001	52	1	5	46	C	missense_variant	MODERATE	Y32B12C.3	WBGene00012526	transcript	Y32B12C.3	protein_coding
V	16614233	G	[A]	{G, A}	0.0961538	0.912281	TRUE	FALSE	TRUE	0.175504	52	0	5	47	A	missense_variant	MODERATE	Y32B12C.3	WBGene00012526	transcript	Y32B12C.3	protein_coding
V	16614235	C	[A]	{A, C}	0.0961538	0.912281	TRUE	FALSE	FALSE	0.175504	52	0	5	47	A	missense_variant	MODERATE	Y32B12C.3	WBGene00012526	transcript	Y32B12C.3	protein_coding
V	16614236	A	[G, T, C]	{G, A}	0.115385	0.912281	TRUE	FALSE	FALSE	0.206124	52	0	6	46	C	missense_variant	MODERATE	Y32B12C.3	WBGene00012526	transcript	Y32B12C.3	protein_coding
V	16614253	T	[C]	{C, T}	0.105769	0.912281	TRUE	FALSE	TRUE	0.191001	52	3	4	45	C	missense_variant	MODERATE	Y32B12C.3	WBGene00012526	transcript	Y32B12C.3	protein_coding
V	16614272	A	[T, G]	{G, A, T}	0.105769	0.912281	TRUE	FALSE	FALSE	0.191001	52	3	4	45	T	missense_variant	MODERATE	Y32B12C.3	WBGene00012526	transcript	Y32B12C.3	protein_coding
V	16614275	T	[C]	{C, T}	0.105769	0.912281	TRUE	FALSE	TRUE	0.191001	52	3	4	45	C	missense_variant	MODERATE	Y32B12C.3	WBGene00012526	transcript	Y32B12C.3	protein_coding
V	16614317	A	[T]	{A, T}	0.0769231	0.912281	TRUE	FALSE	FALSE	0.143391	52	4	2	46	T	missense_variant	MODERATE	Y32B12C.3	WBGene00012526	transcript	Y32B12C.3	protein_coding
V	16614328	T	[C]	{C, T}	0.0192308	0.912281	TRUE	FALSE	TRUE	0.0380881	52	0	1	51	C	missense_variant	MODERATE	Y32B12C.3	WBGene00012526	transcript	Y32B12C.3	protein_coding
V	16614332	T	[C]	{C, T}	0.115385	0.912281	TRUE	FALSE	TRUE	0.206124	52	0	6	46	C	missense_variant	MODERATE	Y32B12C.3	WBGene00012526	transcript	Y32B12C.3	protein_coding
V	16614347	G	[T]	{G, T}	0.115385	0.912281	TRUE	FALSE	FALSE	0.206124	52	0	6	46	T	missense_variant	MODERATE	Y32B12C.3	WBGene00012526	transcript	Y32B12C.3	protein_coding
V	16614351	T	[G]	{G, T}	0.115385	0.912281	TRUE	FALSE	FALSE	0.206124	52	0	6	46	G	missense_variant	MODERATE	Y32B12C.3	WBGene00012526	transcript	Y32B12C.3	protein_coding
V	16614352	C	[T]	{C, T}	0.115385	0.912281	TRUE	FALSE	TRUE	0.206124	52	0	6	46	T	missense_variant	MODERATE	Y32B12C.3	WBGene00012526	transcript	Y32B12C.3	protein_coding
V	16614367	C	[A]	{A, C}	0.192308	0.912281	TRUE	FALSE	FALSE	0.313667	52	0	10	42	A	missense_variant	MODERATE	Y32B12C.3	WBGene00012526	transcript	Y32B12C.3	protein_coding
V	16614448	C	[A]	{A, C}	0.0673077	0.912281	TRUE	FALSE	FALSE	0.126774	52	5	1	46	A	missense_variant	MODERATE	Y32B12C.3	WBGene00012526	transcript	Y32B12C.3	protein_coding
V	16614453	C	[G]	{G, C}	0.0673077	0.912281	TRUE	FALSE	FALSE	0.126774	52	5	1	46	G	missense_variant	MODERATE	Y32B12C.3	WBGene00012526	transcript	Y32B12C.3	protein_coding
V	16614459	T	[C]	{C, T}	0.153846	0.912281	TRUE	FALSE	TRUE	0.262883	52	2	7	43	C	missense_variant	MODERATE	Y32B12C.3	WBGene00012526	transcript	Y32B12C.3	protein_coding
V	16614466	G	[A]	{G, A}	0.134615	0.912281	TRUE	FALSE	TRUE	0.23525	52	2	6	44	A	missense_variant	MODERATE	Y32B12C.3	WBGene00012526	transcript	Y32B12C.3	protein_coding
V	16614514	A	[C]	{A, C}	0.105769	0.912281	TRUE	FALSE	FALSE	0.191001	52	1	5	46	C	missense_variant	MODERATE	Y32B12C.3	WBGene00012526	transcript	Y32B12C.3	protein_coding
V	16614518	A	[G]	{G, A}	0.307692	0.912281	TRUE	FALSE	TRUE	0.430172	52	0	16	36	G	missense_variant	MODERATE	Y32B12C.3	WBGene00012526	transcript	Y32B12C.3	protein_coding
V	16614521	A	[T]	{A, T}	0.313725	0.894737	TRUE	FALSE	FALSE	0.434867	51	0	16	35	T	missense_variant	MODERATE	Y32B12C.3	WBGene00012526	transcript	Y32B12C.3	protein_coding
V	16614563	T	[C]	{C, T}	0.0175439	1	TRUE	FALSE	TRUE	0.0347772	57	0	1	56	C	missense_variant	MODERATE	Y32B12C.3	WBGene00012526	transcript	Y32B12C.3	protein_coding
V	16614564	G	[C, A]	{G, C}	0.0175439	1	TRUE	FALSE	FALSE	0.0347772	57	0	1	56	C	missense_variant	MODERATE	Y32B12C.3	WBGene00012526	transcript	Y32B12C.3	protein_coding
V	16614581	C	[T]	{C, T}	0.342105	1	TRUE	FALSE	TRUE	0.454122	57	3	18	36	T	missense_variant	MODERATE	Y32B12C.3	WBGene00012526	transcript	Y32B12C.3	protein_coding
V	16614582	A	[T, G]	{A, T}	0.342105	1	TRUE	FALSE	FALSE	0.454122	57	3	18	36	T	missense_variant	MODERATE	Y32B12C.3	WBGene00012526	transcript	Y32B12C.3	protein_coding
V	16614608	T	[C]	{C, T}	0.0789474	1	TRUE	FALSE	TRUE	0.146716	57	3	3	51	C	missense_variant	MODERATE	Y32B12C.3	WBGene00012526	transcript	Y32B12C.3	protein_coding
V	16614629	T	[A]	{A, T}	0.0526316	1	TRUE	FALSE	FALSE	0.100605	57	0	3	54	A	missense_variant	MODERATE	Y32B12C.3	WBGene00012526	transcript	Y32B12C.3	protein_coding
V	16614635	C	[T]	{C, T}	0.421053	1	TRUE	FALSE	TRUE	0.491849	57	0	24	33	T	missense_variant	MODERATE	Y32B12C.3	WBGene00012526	transcript	Y32B12C.3	protein_coding
V	16614647	T	[A, C]	{A, C, T}	0.377193	1	TRUE	FALSE	FALSE	0.473995	57	3	20	34	A	missense_variant	MODERATE	Y32B12C.3	WBGene00012526	transcript	Y32B12C.3	protein_coding
V	16614653	G	[C]	{G, C}	0.0789474	1	TRUE	FALSE	FALSE	0.146716	57	3	3	51	C	missense_variant	MODERATE	Y32B12C.3	WBGene00012526	transcript	Y32B12C.3	protein_coding
V	16614671	C	[T, G]	{G, C, T}	0.192982	1	TRUE	FALSE	FALSE	0.314237	57	4	9	44	G	missense_variant	MODERATE	Y32B12C.3	WBGene00012526	transcript	Y32B12C.3	protein_coding
V	16614675	A	[T]	{A, T}	0.421053	1	TRUE	FALSE	FALSE	0.491849	57	0	24	33	T	missense_variant	MODERATE	Y32B12C.3	WBGene00012526	transcript	Y32B12C.3	protein_coding
V	16614689	C	[T]	{C, T}	0.0175439	1	TRUE	FALSE	TRUE	0.0347772	57	0	1	56	T	missense_variant	MODERATE	Y32B12C.3	WBGene00012526	transcript	Y32B12C.3	protein_coding
V	16614760	A	[T]	{A, T}	0.333333	1	TRUE	FALSE	FALSE	0.448378	57	2	18	37	T	missense_variant	MODERATE	Y32B12C.3	WBGene00012526	transcript	Y32B12C.3	protein_coding
V	16614762	C	[G]	{G, C}	0.140351	1	TRUE	FALSE	FALSE	0.24344	57	0	8	49	G	missense_variant	MODERATE	Y32B12C.3	WBGene00012526	transcript	Y32B12C.3	protein_coding
V	16618397	T	[C]	{C, T}	0.280702	1	TRUE	FALSE	TRUE	0.40739	57	2	15	40	C	missense_variant	MODERATE	Y70C5A.3	WBGene00050904	transcript	Y70C5A.3	protein_coding
V	16618400	C	[A]	{A, C}	0.27193	1	TRUE	FALSE	FALSE	0.399472	57	1	15	41	A	missense_variant	MODERATE	Y70C5A.3	WBGene00050904	transcript	Y70C5A.3	protein_coding
V	16618407	T	[C, A]	{C, T}	0.394737	1	TRUE	FALSE	FALSE	0.482068	57	3	21	33	A	missense_variant	MODERATE	Y70C5A.3	WBGene00050904	transcript	Y70C5A.3	protein_coding
V	16618411	A	[G]	{G, A}	0.421053	1	TRUE	FALSE	TRUE	0.491849	57	0	24	33	G	missense_variant	MODERATE	Y70C5A.3	WBGene00050904	transcript	Y70C5A.3	protein_coding
V	16618428	C	[A]	{A, C}	0.280702	1	TRUE	FALSE	FALSE	0.40739	57	2	15	40	A	missense_variant	MODERATE	Y70C5A.3	WBGene00050904	transcript	Y70C5A.3	protein_coding
V	16618441	C	[T]	{C, T}	0.280702	1	TRUE	FALSE	TRUE	0.40739	57	2	15	40	T	missense_variant	MODERATE	Y70C5A.3	WBGene00050904	transcript	Y70C5A.3	protein_coding
V	16618443	A	[T]	{A, T}	0.280702	1	TRUE	FALSE	FALSE	0.40739	57	2	15	40	T	missense_variant	MODERATE	Y70C5A.3	WBGene00050904	transcript	Y70C5A.3	protein_coding
V	16618481	T	[C]	{C, T}	0.403509	1	TRUE	FALSE	TRUE	0.485639	57	2	22	33	C	missense_variant	MODERATE	Y70C5A.3	WBGene00050904	transcript	Y70C5A.3	protein_coding
V	16618484	G	[T, A]	{G, A, T}	0.0350877	1	TRUE	FALSE	FALSE	0.0683124	57	2	1	54	A	missense_variant	MODERATE	Y70C5A.3	WBGene00050904	transcript	Y70C5A.3	protein_coding
V	16618486	T	[A]	{A, T}	0.421053	1	TRUE	FALSE	FALSE	0.491849	57	0	24	33	A	missense_variant	MODERATE	Y70C5A.3	WBGene00050904	transcript	Y70C5A.3	protein_coding
V	16618502	C	[T]	{C, T}	0.214286	0.982456	TRUE	FALSE	TRUE	0.339768	56	0	12	44	T	missense_variant	MODERATE	Y70C5A.3	WBGene00050904	transcript	Y70C5A.3	protein_coding
V	16618504	C	[T]	{C, T}	0.214286	0.982456	TRUE	FALSE	TRUE	0.339768	56	0	12	44	T	missense_variant	MODERATE	Y70C5A.3	WBGene00050904	transcript	Y70C5A.3	protein_coding
V	16618507	G	[T]	{G, T}	0.214286	0.982456	TRUE	FALSE	FALSE	0.339768	56	0	12	44	T	missense_variant	MODERATE	Y70C5A.3	WBGene00050904	transcript	Y70C5A.3	protein_coding
V	16618517	A	[T]	{A, T}	0.178571	0.982456	TRUE	FALSE	FALSE	0.29601	56	2	9	45	T	missense_variant	MODERATE	Y70C5A.3	WBGene00050904	transcript	Y70C5A.3	protein_coding
V	16618523	A	[C]	{A, C}	0.214286	0.982456	TRUE	FALSE	FALSE	0.339768	56	2	11	43	C	missense_variant	MODERATE	Y70C5A.3	WBGene00050904	transcript	Y70C5A.3	protein_coding
V	16618554	G	[A, C]	{G, A}	0.403509	1	TRUE	FALSE	FALSE	0.485639	57	0	23	34	C	missense_variant	MODERATE	Y70C5A.3	WBGene00050904	transcript	Y70C5A.3	protein_coding
V	16618556	T	[G]	{G, T}	0.377193	1	TRUE	FALSE	FALSE	0.473995	57	3	20	34	G	missense_variant	MODERATE	Y70C5A.3	WBGene00050904	transcript	Y70C5A.3	protein_coding
V	16618585	T	[C]	{C, T}	0.385965	1	TRUE	FALSE	TRUE	0.478187	57	4	20	33	C	missense_variant	MODERATE	Y70C5A.3	WBGene00050904	transcript	Y70C5A.3	protein_coding
V	16618590	C	[G, A]	{G, C}	0.421053	1	TRUE	FALSE	FALSE	0.491849	57	0	24	33	A	missense_variant	MODERATE	Y70C5A.3	WBGene00050904	transcript	Y70C5A.3	protein_coding
V	16618619	T	[C]	{C, T}	0.263158	1	TRUE	FALSE	TRUE	0.391244	57	0	15	42	C	missense_variant	MODERATE	Y70C5A.3	WBGene00050904	transcript	Y70C5A.3	protein_coding
V	16618621	C	[G, A]	{G, C}	0.0263158	1	TRUE	FALSE	FALSE	0.0517	57	1	1	55	A	missense_variant	MODERATE	Y70C5A.3	WBGene00050904	transcript	Y70C5A.3	protein_coding
V	16618622	G	[A]	{G, A}	0.263158	1	TRUE	FALSE	TRUE	0.391244	57	0	15	42	A	missense_variant	MODERATE	Y70C5A.3	WBGene00050904	transcript	Y70C5A.3	protein_coding
V	16618628	T	[G, C]	{G, C, T}	0.27193	1	TRUE	FALSE	FALSE	0.399472	57	1	15	41	C	missense_variant	MODERATE	Y70C5A.3	WBGene00050904	transcript	Y70C5A.3	protein_coding
V	16618635	T	[A]	{A, T}	0.0350877	1	TRUE	FALSE	FALSE	0.0683124	57	0	2	55	A	missense_variant&splice_region_variant	MODERATE	Y70C5A.3	WBGene00050904	transcript	Y70C5A.3	protein_coding
V	16618636	T	[G, A]	{G, T}	0.263158	1	TRUE	FALSE	FALSE	0.391244	57	0	15	42	A	missense_variant&splice_region_variant	MODERATE	Y70C5A.3	WBGene00050904	transcript	Y70C5A.3	protein_coding
V	16618684	G	[T, A]	{G, A, T}	0.0614035	1	TRUE	FALSE	FALSE	0.116286	57	3	2	52	T	missense_variant&splice_region_variant	MODERATE	Y70C5A.3	WBGene00050904	transcript	Y70C5A.3	protein_coding
V	16618694	T	[C, A]	{C, T}	0.0350877	1	TRUE	FALSE	FALSE	0.0683124	57	0	2	55	A	missense_variant	MODERATE	Y70C5A.3	WBGene00050904	transcript	Y70C5A.3	protein_coding
V	16618700	A	[G]	{G, A}	0.263158	1	TRUE	FALSE	TRUE	0.391244	57	0	15	42	G	missense_variant	MODERATE	Y70C5A.3	WBGene00050904	transcript	Y70C5A.3	protein_coding
V	16618701	T	[A]	{A, T}	0.0789474	1	TRUE	FALSE	FALSE	0.146716	57	1	4	52	A	missense_variant	MODERATE	Y70C5A.3	WBGene00050904	transcript	Y70C5A.3	protein_coding
V	16618704	C	[T]	{C, T}	0.0350877	1	TRUE	FALSE	TRUE	0.0683124	57	0	2	55	T	missense_variant	MODERATE	Y70C5A.3	WBGene00050904	transcript	Y70C5A.3	protein_coding
V	16618721	A	[G]	{G, A}	0.0614035	1	TRUE	FALSE	TRUE	0.116286	57	3	2	52	G	missense_variant	MODERATE	Y70C5A.3	WBGene00050904	transcript	Y70C5A.3	protein_coding
V	16618732	A	[T]	{A, T}	0.263158	1	TRUE	FALSE	FALSE	0.391244	57	0	15	42	T	missense_variant	MODERATE	Y70C5A.3	WBGene00050904	transcript	Y70C5A.3	protein_coding
V	16618734	C	[G]	{G, C}	0.263158	1	TRUE	FALSE	FALSE	0.391244	57	0	15	42	G	missense_variant	MODERATE	Y70C5A.3	WBGene00050904	transcript	Y70C5A.3	protein_coding
V	16618757	C	[G]	{G, C}	0.0438596	1	TRUE	FALSE	FALSE	0.0846142	57	3	1	53	G	missense_variant	MODERATE	Y70C5A.3	WBGene00050904	transcript	Y70C5A.3	protein_coding
V	16618758	A	[C]	{A, C}	0.0175439	1	TRUE	FALSE	FALSE	0.0347772	57	0	1	56	C	missense_variant	MODERATE	Y70C5A.3	WBGene00050904	transcript	Y70C5A.3	protein_coding
V	16618761	C	[T]	{C, T}	0.0175439	1	TRUE	FALSE	TRUE	0.0347772	57	0	1	56	T	missense_variant	MODERATE	Y70C5A.3	WBGene00050904	transcript	Y70C5A.3	protein_coding
V	16618766	T	[C]	{C, T}	0.0175439	1	TRUE	FALSE	TRUE	0.0347772	57	0	1	56	C	missense_variant	MODERATE	Y70C5A.3	WBGene00050904	transcript	Y70C5A.3	protein_coding
V	16618772	A	[G, C]	{G, A, C}	0.298246	1	TRUE	FALSE	FALSE	0.422295	57	2	16	39	C	missense_variant	MODERATE	Y70C5A.3	WBGene00050904	transcript	Y70C5A.3	protein_coding
V	16618773	C	[G, T]	{G, C, T}	0.0350877	1	TRUE	FALSE	FALSE	0.0683124	57	0	2	55	G	missense_variant	MODERATE	Y70C5A.3	WBGene00050904	transcript	Y70C5A.3	protein_coding
V	16618776	C	[A, T]	{A, C, T}	0.333333	1	TRUE	FALSE	FALSE	0.448378	57	0	19	38	A	missense_variant	MODERATE	Y70C5A.3	WBGene00050904	transcript	Y70C5A.3	protein_coding
V	16618797	G	[A, T]	{G, A}	0.245614	1	TRUE	FALSE	FALSE	0.373855	57	0	14	43	T	missense_variant	MODERATE	Y70C5A.3	WBGene00050904	transcript	Y70C5A.3	protein_coding
V	16618803	T	[G]	{G, T}	0.0526316	1	TRUE	FALSE	FALSE	0.100605	57	0	3	54	G	missense_variant	MODERATE	Y70C5A.3	WBGene00050904	transcript	Y70C5A.3	protein_coding
V	16618809	T	[A, G]	{G, A, T}	0.350877	1	TRUE	FALSE	FALSE	0.459556	57	0	20	37	A	missense_variant	MODERATE	Y70C5A.3	WBGene00050904	transcript	Y70C5A.3	protein_coding
V	16618810	A	[T, C]	{A, C, T}	0.333333	1	TRUE	FALSE	FALSE	0.448378	57	2	18	37	C	missense_variant	MODERATE	Y70C5A.3	WBGene00050904	transcript	Y70C5A.3	protein_coding
V	16618825	T	[C]	{C, T}	0.0526316	1	TRUE	FALSE	TRUE	0.100605	57	0	3	54	C	missense_variant	MODERATE	Y70C5A.3	WBGene00050904	transcript	Y70C5A.3	protein_coding
V	16618826	A	[T]	{A, T}	0.298246	1	TRUE	FALSE	FALSE	0.422295	57	0	17	40	T	missense_variant	MODERATE	Y70C5A.3	WBGene00050904	transcript	Y70C5A.3	protein_coding
V	16618833	T	[G]	{G, T}	0.0526316	1	TRUE	FALSE	FALSE	0.100605	57	0	3	54	G	missense_variant	MODERATE	Y70C5A.3	WBGene00050904	transcript	Y70C5A.3	protein_coding
V	16618850	C	[T]	{C, T}	0.0526316	1	TRUE	FALSE	TRUE	0.100605	57	0	3	54	T	missense_variant	MODERATE	Y70C5A.3	WBGene00050904	transcript	Y70C5A.3	protein_coding
V	16618892	A	[G]	{G, A}	0.0204082	0.859649	TRUE	FALSE	TRUE	0.0403955	49	0	1	48	G	missense_variant	MODERATE	Y70C5A.3	WBGene00050904	transcript	Y70C5A.3	protein_coding
V	16618917	T	[A]	{A, T}	0.315789	1	TRUE	FALSE	FALSE	0.435957	57	0	18	39	A	missense_variant	MODERATE	Y70C5A.3	WBGene00050904	transcript	Y70C5A.3	protein_coding
V	16618930	A	[C, T]	{A, C, T}	0.421053	1	TRUE	FALSE	FALSE	0.491849	57	0	24	33	C	missense_variant	MODERATE	Y70C5A.3	WBGene00050904	transcript	Y70C5A.3	protein_coding
V	16618932	A	[G]	{G, A}	0.350877	1	TRUE	FALSE	TRUE	0.459556	57	0	20	37	G	missense_variant	MODERATE	Y70C5A.3	WBGene00050904	transcript	Y70C5A.3	protein_coding
V	16618942	T	[A, C]	{A, T}	0.298246	1	TRUE	FALSE	FALSE	0.422295	57	0	17	40	A	missense_variant	MODERATE	Y70C5A.3	WBGene00050904	transcript	Y70C5A.3	protein_coding
V	16618965	G	[A]	{G, A}	0.0526316	1	TRUE	FALSE	TRUE	0.100605	57	0	3	54	A	missense_variant	MODERATE	Y70C5A.3	WBGene00050904	transcript	Y70C5A.3	protein_coding
V	16618986	T	[G]	{G, T}	0.298246	1	TRUE	FALSE	FALSE	0.422295	57	0	17	40	G	missense_variant	MODERATE	Y70C5A.3	WBGene00050904	transcript	Y70C5A.3	protein_coding
V	16619001	G	[A]	{G, A}	0.298246	1	TRUE	FALSE	TRUE	0.422295	57	0	17	40	A	missense_variant	MODERATE	Y70C5A.3	WBGene00050904	transcript	Y70C5A.3	protein_coding
V	16619024	T	[A]	{A, T}	0.0175439	1	TRUE	FALSE	FALSE	0.0347772	57	0	1	56	A	missense_variant	MODERATE	Y70C5A.3	WBGene00050904	transcript	Y70C5A.3	protein_coding
V	16619058	C	[T]	{C, T}	0.0526316	1	TRUE	FALSE	TRUE	0.100605	57	0	3	54	T	missense_variant	MODERATE	Y70C5A.3	WBGene00050904	transcript	Y70C5A.3	protein_coding
V	16619059	G	[T]	{G, T}	0.350877	1	TRUE	FALSE	FALSE	0.459556	57	0	20	37	T	missense_variant	MODERATE	Y70C5A.3	WBGene00050904	transcript	Y70C5A.3	protein_coding
V	16619072	G	[T]	{G, T}	0.0526316	1	TRUE	FALSE	FALSE	0.100605	57	0	3	54	T	missense_variant	MODERATE	Y70C5A.3	WBGene00050904	transcript	Y70C5A.3	protein_coding
V	16619074	A	[C]	{A, C}	0.298246	1	TRUE	FALSE	FALSE	0.422295	57	0	17	40	C	missense_variant	MODERATE	Y70C5A.3	WBGene00050904	transcript	Y70C5A.3	protein_coding
V	16619091	G	[T]	{G, T}	0.298246	1	TRUE	FALSE	FALSE	0.422295	57	0	17	40	T	missense_variant	MODERATE	Y70C5A.3	WBGene00050904	transcript	Y70C5A.3	protein_coding
V	16619097	T	[C]	{C, T}	0.298246	1	TRUE	FALSE	TRUE	0.422295	57	0	17	40	C	missense_variant	MODERATE	Y70C5A.3	WBGene00050904	transcript	Y70C5A.3	protein_coding
V	16619126	A	[T]	{A, T}	0.0701754	1	TRUE	FALSE	FALSE	0.131657	57	0	4	53	T	missense_variant	MODERATE	Y70C5A.3	WBGene00050904	transcript	Y70C5A.3	protein_coding
V	16619128	A	[T]	{A, T}	0.315789	1	TRUE	FALSE	FALSE	0.435957	57	0	18	39	T	missense_variant	MODERATE	Y70C5A.3	WBGene00050904	transcript	Y70C5A.3	protein_coding
V	16619130	T	[G]	{G, T}	0.315789	1	TRUE	FALSE	FALSE	0.435957	57	0	18	39	G	missense_variant	MODERATE	Y70C5A.3	WBGene00050904	transcript	Y70C5A.3	protein_coding
V	16619144	C	[T, A]	{C, T}	0.315789	1	TRUE	FALSE	FALSE	0.435957	57	0	18	39	A	missense_variant	MODERATE	Y70C5A.3	WBGene00050904	transcript	Y70C5A.3	protein_coding
V	16619150	A	[G]	{G, A}	0.315789	1	TRUE	FALSE	TRUE	0.435957	57	0	18	39	G	missense_variant	MODERATE	Y70C5A.3	WBGene00050904	transcript	Y70C5A.3	protein_coding
V	16619163	A	[T]	{A, T}	0.315789	1	TRUE	FALSE	FALSE	0.435957	57	0	18	39	T	missense_variant	MODERATE	Y70C5A.3	WBGene00050904	transcript	Y70C5A.3	protein_coding
V	16619200	C	[A]	{A, C}	0.298246	1	TRUE	FALSE	FALSE	0.422295	57	0	17	40	A	missense_variant	MODERATE	Y70C5A.3	WBGene00050904	transcript	Y70C5A.3	protein_coding
V	16619208	G	[T]	{G, T}	0.0877193	1	TRUE	FALSE	FALSE	0.161466	57	0	5	52	T	missense_variant	MODERATE	Y70C5A.3	WBGene00050904	transcript	Y70C5A.3	protein_coding
V	16619214	A	[T]	{A, T}	0.0526316	1	TRUE	FALSE	FALSE	0.100605	57	0	3	54	T	missense_variant	MODERATE	Y70C5A.3	WBGene00050904	transcript	Y70C5A.3	protein_coding
V	16619215	T	[G]	{G, T}	0.0877193	1	TRUE	FALSE	FALSE	0.161466	57	0	5	52	G	missense_variant	MODERATE	Y70C5A.3	WBGene00050904	transcript	Y70C5A.3	protein_coding
V	16619219	T	[G]	{G, T}	0.0526316	1	TRUE	FALSE	FALSE	0.100605	57	0	3	54	G	missense_variant	MODERATE	Y70C5A.3	WBGene00050904	transcript	Y70C5A.3	protein_coding
V	16619228	C	[T]	{C, T}	0.0526316	1	TRUE	FALSE	TRUE	0.100605	57	0	3	54	T	missense_variant	MODERATE	Y70C5A.3	WBGene00050904	transcript	Y70C5A.3	protein_coding
V	16619229	G	[T]	{G, T}	0.0526316	1	TRUE	FALSE	FALSE	0.100605	57	0	3	54	T	missense_variant	MODERATE	Y70C5A.3	WBGene00050904	transcript	Y70C5A.3	protein_coding
V	16619237	T	[A]	{A, T}	0.280702	1	TRUE	FALSE	FALSE	0.40739	57	0	16	41	A	missense_variant	MODERATE	Y70C5A.3	WBGene00050904	transcript	Y70C5A.3	protein_coding
V	16619238	C	[T]	{C, T}	0.280702	1	TRUE	FALSE	TRUE	0.40739	57	0	16	41	T	missense_variant	MODERATE	Y70C5A.3	WBGene00050904	transcript	Y70C5A.3	protein_coding
V	16619254	G	[C, A]	{G, A, C}	0.375	0.982456	TRUE	FALSE	FALSE	0.472973	56	0	21	35	C	missense_variant	MODERATE	Y70C5A.3	WBGene00050904	transcript	Y70C5A.3	protein_coding
V	16619258	C	[T]	{C, T}	0.375	0.982456	TRUE	FALSE	TRUE	0.472973	56	0	21	35	T	missense_variant	MODERATE	Y70C5A.3	WBGene00050904	transcript	Y70C5A.3	protein_coding
V	16619276	T	[C]	{C, T}	0.303571	0.982456	TRUE	FALSE	TRUE	0.426641	56	0	17	39	C	missense_variant	MODERATE	Y70C5A.3	WBGene00050904	transcript	Y70C5A.3	protein_coding
V	16619280	G	[A]	{G, A}	0.375	0.982456	TRUE	FALSE	TRUE	0.472973	56	0	21	35	A	missense_variant	MODERATE	Y70C5A.3	WBGene00050904	transcript	Y70C5A.3	protein_coding
V	16619305	T	[G]	{G, T}	0.321429	0.982456	TRUE	FALSE	FALSE	0.440154	56	0	18	38	G	missense_variant	MODERATE	Y70C5A.3	WBGene00050904	transcript	Y70C5A.3	protein_coding
V	16619306	T	[C]	{C, T}	0.303571	0.982456	TRUE	FALSE	TRUE	0.426641	56	0	17	39	C	missense_variant	MODERATE	Y70C5A.3	WBGene00050904	transcript	Y70C5A.3	protein_coding
V	16619324	G	[T]	{G, T}	0.321429	0.982456	TRUE	FALSE	FALSE	0.440154	56	0	18	38	T	missense_variant	MODERATE	Y70C5A.3	WBGene00050904	transcript	Y70C5A.3	protein_coding
V	16619334	A	[T]	{A, T}	0.375	0.982456	TRUE	FALSE	FALSE	0.472973	56	0	21	35	T	missense_variant	MODERATE	Y70C5A.3	WBGene00050904	transcript	Y70C5A.3	protein_coding
V	16619343	A	[C]	{A, C}	0.303571	0.982456	TRUE	FALSE	FALSE	0.426641	56	0	17	39	C	missense_variant	MODERATE	Y70C5A.3	WBGene00050904	transcript	Y70C5A.3	protein_coding
V	16619349	C	[T]	{C, T}	0.321429	0.982456	TRUE	FALSE	TRUE	0.440154	56	0	18	38	T	missense_variant	MODERATE	Y70C5A.3	WBGene00050904	transcript	Y70C5A.3	protein_coding
V	16619354	G	[A]	{G, A}	0.303571	0.982456	TRUE	FALSE	TRUE	0.426641	56	0	17	39	A	missense_variant	MODERATE	Y70C5A.3	WBGene00050904	transcript	Y70C5A.3	protein_coding
V	16619368	G	[T]	{G, T}	0.230769	0.912281	TRUE	FALSE	FALSE	0.358476	52	0	12	40	T	missense_variant	MODERATE	Y70C5A.3	WBGene00050904	transcript	Y70C5A.3	protein_coding
V	16619370	T	[C]	{C, T}	0.0576923	0.912281	TRUE	FALSE	TRUE	0.109783	52	0	3	49	C	missense_variant	MODERATE	Y70C5A.3	WBGene00050904	transcript	Y70C5A.3	protein_coding
V	16619371	T	[G]	{G, T}	0.230769	0.912281	TRUE	FALSE	FALSE	0.358476	52	0	12	40	G	missense_variant	MODERATE	Y70C5A.3	WBGene00050904	transcript	Y70C5A.3	protein_coding
V	16619376	C	[T]	{C, T}	0.0769231	0.912281	TRUE	FALSE	TRUE	0.143391	52	0	4	48	T	missense_variant	MODERATE	Y70C5A.3	WBGene00050904	transcript	Y70C5A.3	protein_coding
V	16619378	A	[G]	{G, A}	0.0769231	0.912281	TRUE	FALSE	TRUE	0.143391	52	0	4	48	G	missense_variant	MODERATE	Y70C5A.3	WBGene00050904	transcript	Y70C5A.3	protein_coding
V	16619387	C	[T]	{C, T}	0.267857	0.982456	TRUE	FALSE	TRUE	0.395753	56	0	15	41	T	missense_variant	MODERATE	Y70C5A.3	WBGene00050904	transcript	Y70C5A.3	protein_coding
V	16619394	A	[T]	{A, T}	0.267857	0.982456	TRUE	FALSE	FALSE	0.395753	56	0	15	41	T	missense_variant	MODERATE	Y70C5A.3	WBGene00050904	transcript	Y70C5A.3	protein_coding
V	16619397	A	[G]	{G, A}	0.0535714	0.982456	TRUE	FALSE	TRUE	0.102317	56	0	3	53	G	missense_variant	MODERATE	Y70C5A.3	WBGene00050904	transcript	Y70C5A.3	protein_coding
V	16619412	C	[T]	{C, T}	0.0178571	0.982456	TRUE	FALSE	TRUE	0.0353925	56	0	1	55	T	missense_variant	MODERATE	Y70C5A.3	WBGene00050904	transcript	Y70C5A.3	protein_coding
V	16619442	G	[T]	{G, T}	0.303571	0.982456	TRUE	FALSE	FALSE	0.426641	56	0	17	39	T	missense_variant	MODERATE	Y70C5A.3	WBGene00050904	transcript	Y70C5A.3	protein_coding
V	16619467	A	[T]	{A, T}	0.375	0.982456	TRUE	FALSE	FALSE	0.472973	56	0	21	35	T	missense_variant	MODERATE	Y70C5A.3	WBGene00050904	transcript	Y70C5A.3	protein_coding
V	16619495	T	[C]	{C, T}	0.321429	0.982456	TRUE	FALSE	TRUE	0.440154	56	0	18	38	C	missense_variant	MODERATE	Y70C5A.3	WBGene00050904	transcript	Y70C5A.3	protein_coding
V	16619496	T	[C]	{C, T}	0.321429	0.982456	TRUE	FALSE	TRUE	0.440154	56	0	18	38	C	missense_variant	MODERATE	Y70C5A.3	WBGene00050904	transcript	Y70C5A.3	protein_coding
V	16619498	T	[C]	{C, T}	0.303571	0.982456	TRUE	FALSE	TRUE	0.426641	56	0	17	39	C	missense_variant	MODERATE	Y70C5A.3	WBGene00050904	transcript	Y70C5A.3	protein_coding
V	16619506	T	[G]	{G, T}	0.298246	1	TRUE	FALSE	FALSE	0.422295	57	0	17	40	G	missense_variant	MODERATE	Y70C5A.3	WBGene00050904	transcript	Y70C5A.3	protein_coding
V	16619517	T	[C]	{C, T}	0.0526316	1	TRUE	FALSE	TRUE	0.100605	57	0	3	54	C	missense_variant	MODERATE	Y70C5A.3	WBGene00050904	transcript	Y70C5A.3	protein_coding
V	16619519	T	[A]	{A, T}	0.298246	1	TRUE	FALSE	FALSE	0.422295	57	0	17	40	A	missense_variant&splice_region_variant	MODERATE	Y70C5A.3	WBGene00050904	transcript	Y70C5A.3	protein_coding
V	16619579	G	[C]	{G, C}	0.321429	0.982456	TRUE	FALSE	FALSE	0.440154	56	0	18	38	C	missense_variant	MODERATE	Y70C5A.3	WBGene00050904	transcript	Y70C5A.3	protein_coding
V	16619584	C	[G]	{G, C}	0.321429	0.982456	TRUE	FALSE	FALSE	0.440154	56	0	18	38	G	missense_variant	MODERATE	Y70C5A.3	WBGene00050904	transcript	Y70C5A.3	protein_coding
V	16619600	T	[C]	{C, T}	0.321429	0.982456	TRUE	FALSE	TRUE	0.440154	56	0	18	38	C	missense_variant	MODERATE	Y70C5A.3	WBGene00050904	transcript	Y70C5A.3	protein_coding
V	16619631	T	[A, G]	{G, A, T}	0.321429	0.982456	TRUE	FALSE	FALSE	0.440154	56	0	18	38	A	missense_variant	MODERATE	Y70C5A.3	WBGene00050904	transcript	Y70C5A.3	protein_coding
V	16619634	T	[A, G]	{G, A, T}	0.375	0.982456	TRUE	FALSE	FALSE	0.472973	56	0	21	35	A	missense_variant	MODERATE	Y70C5A.3	WBGene00050904	transcript	Y70C5A.3	protein_coding
V	16619657	C	[T]	{C, T}	0.321429	0.982456	TRUE	FALSE	TRUE	0.440154	56	0	18	38	T	missense_variant	MODERATE	Y70C5A.3	WBGene00050904	transcript	Y70C5A.3	protein_coding
V	16619928	C	[G]	{G, C}	0.309091	0.964912	TRUE	FALSE	FALSE	0.431026	55	0	17	38	G	missense_variant	MODERATE	Y70C5A.3	WBGene00050904	transcript	Y70C5A.3	protein_coding
V	16619946	T	[C]	{C, T}	0.309091	0.964912	TRUE	FALSE	TRUE	0.431026	55	0	17	38	C	missense_variant	MODERATE	Y70C5A.3	WBGene00050904	transcript	Y70C5A.3	protein_coding
V	16619966	C	[T]	{C, T}	0.327273	0.964912	TRUE	FALSE	TRUE	0.44437	55	0	18	37	T	missense_variant	MODERATE	Y70C5A.3	WBGene00050904	transcript	Y70C5A.3	protein_coding
V	16619967	A	[G]	{G, A}	0.0181818	0.964912	TRUE	FALSE	TRUE	0.03603	55	0	1	54	G	missense_variant	MODERATE	Y70C5A.3	WBGene00050904	transcript	Y70C5A.3	protein_coding
V	16619972	G	[C]	{G, C}	0.345455	0.964912	TRUE	FALSE	FALSE	0.45638	55	0	19	36	C	missense_variant	MODERATE	Y70C5A.3	WBGene00050904	transcript	Y70C5A.3	protein_coding
V	16619974	C	[G, A]	{G, A, C}	0.321429	0.982456	TRUE	FALSE	FALSE	0.440154	56	0	18	38	A	missense_variant	MODERATE	Y70C5A.3	WBGene00050904	transcript	Y70C5A.3	protein_coding
V	16619988	C	[G]	{G, C}	0.321429	0.982456	TRUE	FALSE	FALSE	0.440154	56	0	18	38	G	missense_variant	MODERATE	Y70C5A.3	WBGene00050904	transcript	Y70C5A.3	protein_coding
V	16620066	G	[C]	{G, C}	0.303571	0.982456	TRUE	FALSE	FALSE	0.426641	56	0	17	39	C	missense_variant	MODERATE	Y70C5A.3	WBGene00050904	transcript	Y70C5A.3	protein_coding
V	16620069	G	[T]	{G, T}	0.303571	0.982456	TRUE	FALSE	FALSE	0.426641	56	0	17	39	T	missense_variant	MODERATE	Y70C5A.3	WBGene00050904	transcript	Y70C5A.3	protein_coding
V	16620091	T	[A, G]	{A, T}	0.321429	0.982456	TRUE	FALSE	FALSE	0.440154	56	0	18	38	A	missense_variant	MODERATE	Y70C5A.3	WBGene00050904	transcript	Y70C5A.3	protein_coding
V	16620092	A	[G]	{G, A}	0.0535714	0.982456	TRUE	FALSE	TRUE	0.102317	56	0	3	53	G	missense_variant	MODERATE	Y70C5A.3	WBGene00050904	transcript	Y70C5A.3	protein_coding
V	16620093	A	[T]	{A, T}	0.303571	0.982456	TRUE	FALSE	FALSE	0.426641	56	0	17	39	T	missense_variant	MODERATE	Y70C5A.3	WBGene00050904	transcript	Y70C5A.3	protein_coding
V	16620102	T	[C]	{C, T}	0.303571	0.982456	TRUE	FALSE	TRUE	0.426641	56	0	17	39	C	missense_variant	MODERATE	Y70C5A.3	WBGene00050904	transcript	Y70C5A.3	protein_coding
V	16620111	C	[T]	{C, T}	0.0535714	0.982456	TRUE	FALSE	TRUE	0.102317	56	0	3	53	T	missense_variant	MODERATE	Y70C5A.3	WBGene00050904	transcript	Y70C5A.3	protein_coding
V	16620113	G	[C]	{G, C}	0.0178571	0.982456	TRUE	FALSE	FALSE	0.0353925	56	0	1	55	C	missense_variant	MODERATE	Y70C5A.3	WBGene00050904	transcript	Y70C5A.3	protein_coding
V	16620114	A	[C]	{A, C}	0.0178571	0.982456	TRUE	FALSE	FALSE	0.0353925	56	0	1	55	C	missense_variant	MODERATE	Y70C5A.3	WBGene00050904	transcript	Y70C5A.3	protein_coding
V	16620120	T	[C]	{C, T}	0.0178571	0.982456	TRUE	FALSE	TRUE	0.0353925	56	0	1	55	C	missense_variant	MODERATE	Y70C5A.3	WBGene00050904	transcript	Y70C5A.3	protein_coding
V	16620122	G	[A]	{G, A}	0.303571	0.982456	TRUE	FALSE	TRUE	0.426641	56	0	17	39	A	missense_variant	MODERATE	Y70C5A.3	WBGene00050904	transcript	Y70C5A.3	protein_coding
V	16620123	A	[G]	{G, A}	0.375	0.982456	TRUE	FALSE	TRUE	0.472973	56	0	21	35	G	missense_variant	MODERATE	Y70C5A.3	WBGene00050904	transcript	Y70C5A.3	protein_coding
V	16620127	A	[T]	{A, T}	0.303571	0.982456	TRUE	FALSE	FALSE	0.426641	56	0	17	39	T	missense_variant	MODERATE	Y70C5A.3	WBGene00050904	transcript	Y70C5A.3	protein_coding
V	16620141	T	[C]	{C, T}	0.303571	0.982456	TRUE	FALSE	TRUE	0.426641	56	0	17	39	C	missense_variant	MODERATE	Y70C5A.3	WBGene00050904	transcript	Y70C5A.3	protein_coding
V	16620193	C	[G]	{G, C}	0.303571	0.982456	TRUE	FALSE	FALSE	0.426641	56	0	17	39	G	missense_variant	MODERATE	Y70C5A.3	WBGene00050904	transcript	Y70C5A.3	protein_coding
V	16620196	G	[C]	{G, C}	0.357143	0.982456	TRUE	FALSE	FALSE	0.46332	56	0	20	36	C	missense_variant	MODERATE	Y70C5A.3	WBGene00050904	transcript	Y70C5A.3	protein_coding
V	16620229	T	[C, A]	{C, T}	0.108696	0.807018	TRUE	FALSE	FALSE	0.195891	46	0	5	41	A	missense_variant	MODERATE	Y70C5A.3	WBGene00050904	transcript	Y70C5A.3	protein_coding
V	16620288	T	[A]	{A, T}	0.298246	1	TRUE	FALSE	FALSE	0.422295	57	0	17	40	A	missense_variant	MODERATE	Y70C5A.3	WBGene00050904	transcript	Y70C5A.3	protein_coding
V	16620297	C	[A]	{A, C}	0.298246	1	TRUE	FALSE	FALSE	0.422295	57	0	17	40	A	missense_variant	MODERATE	Y70C5A.3	WBGene00050904	transcript	Y70C5A.3	protein_coding
V	16620303	C	[A, G]	{G, A, C}	0.368421	1	TRUE	FALSE	FALSE	0.469492	57	0	21	36	A	missense_variant	MODERATE	Y70C5A.3	WBGene00050904	transcript	Y70C5A.3	protein_coding
V	16620304	G	[T, C]	{G, C, T}	0.350877	1	TRUE	FALSE	FALSE	0.459556	57	0	20	37	C	missense_variant	MODERATE	Y70C5A.3	WBGene00050904	transcript	Y70C5A.3	protein_coding
V	16620305	T	[A]	{A, T}	0.298246	1	TRUE	FALSE	FALSE	0.422295	57	0	17	40	A	missense_variant	MODERATE	Y70C5A.3	WBGene00050904	transcript	Y70C5A.3	protein_coding
V	16620309	C	[T, A]	{A, C, T}	0.350877	1	TRUE	FALSE	FALSE	0.459556	57	0	20	37	A	missense_variant	MODERATE	Y70C5A.3	WBGene00050904	transcript	Y70C5A.3	protein_coding
V	16620310	C	[G, A]	{G, A, C}	0.368421	1	TRUE	FALSE	FALSE	0.469492	57	0	21	36	A	missense_variant	MODERATE	Y70C5A.3	WBGene00050904	transcript	Y70C5A.3	protein_coding
V	16620325	A	[T]	{A, T}	0.298246	1	TRUE	FALSE	FALSE	0.422295	57	0	17	40	T	missense_variant	MODERATE	Y70C5A.3	WBGene00050904	transcript	Y70C5A.3	protein_coding
V	16620344	T	[G]	{G, T}	0.0526316	1	TRUE	FALSE	FALSE	0.100605	57	0	3	54	G	missense_variant	MODERATE	Y70C5A.3	WBGene00050904	transcript	Y70C5A.3	protein_coding
V	16620352	C	[T, A]	{C, T}	0.350877	1	TRUE	FALSE	FALSE	0.459556	57	0	20	37	A	missense_variant	MODERATE	Y70C5A.3	WBGene00050904	transcript	Y70C5A.3	protein_coding
V	16620360	A	[G]	{G, A}	0.357143	0.982456	TRUE	FALSE	TRUE	0.46332	56	0	20	36	G	missense_variant	MODERATE	Y70C5A.3	WBGene00050904	transcript	Y70C5A.3	protein_coding
V	16620369	T	[C]	{C, T}	0.0701754	1	TRUE	FALSE	TRUE	0.131657	57	0	4	53	C	missense_variant	MODERATE	Y70C5A.3	WBGene00050904	transcript	Y70C5A.3	protein_coding
V	16620382	A	[G]	{G, A}	0.0175439	1	TRUE	FALSE	TRUE	0.0347772	57	0	1	56	G	missense_variant	MODERATE	Y70C5A.3	WBGene00050904	transcript	Y70C5A.3	protein_coding
V	16620392	T	[C]	{C, T}	0.0178571	0.982456	TRUE	FALSE	TRUE	0.0353925	56	0	1	55	C	missense_variant	MODERATE	Y70C5A.3	WBGene00050904	transcript	Y70C5A.3	protein_coding
V	16620396	A	[T, G]	{G, A, T}	0.107143	0.982456	TRUE	FALSE	FALSE	0.19305	56	0	6	50	G	missense_variant	MODERATE	Y70C5A.3	WBGene00050904	transcript	Y70C5A.3	protein_coding
V	16620397	C	[T, A]	{A, C, T}	0.125	0.982456	TRUE	FALSE	FALSE	0.220721	56	0	7	49	A	missense_variant	MODERATE	Y70C5A.3	WBGene00050904	transcript	Y70C5A.3	protein_coding
V	16620400	A	[T, G]	{G, A, T}	0.125	0.982456	TRUE	FALSE	FALSE	0.220721	56	0	7	49	G	missense_variant	MODERATE	Y70C5A.3	WBGene00050904	transcript	Y70C5A.3	protein_coding
V	16620403	A	[T]	{A, T}	0.125	0.982456	TRUE	FALSE	FALSE	0.220721	56	0	7	49	T	missense_variant	MODERATE	Y70C5A.3	WBGene00050904	transcript	Y70C5A.3	protein_coding
V	16620414	T	[C]	{C, T}	0.127273	0.964912	TRUE	FALSE	TRUE	0.224187	55	0	7	48	C	missense_variant	MODERATE	Y70C5A.3	WBGene00050904	transcript	Y70C5A.3	protein_coding
V	16620425	T	[A]	{A, T}	0.385965	1	TRUE	FALSE	FALSE	0.478187	57	0	22	35	A	missense_variant	MODERATE	Y70C5A.3	WBGene00050904	transcript	Y70C5A.3	protein_coding
V	16620438	A	[G]	{G, A}	0.368421	1	TRUE	FALSE	TRUE	0.469492	57	0	21	36	G	missense_variant	MODERATE	Y70C5A.3	WBGene00050904	transcript	Y70C5A.3	protein_coding
V	16620453	G	[A]	{G, A}	0.298246	1	TRUE	FALSE	TRUE	0.422295	57	0	17	40	A	missense_variant	MODERATE	Y70C5A.3	WBGene00050904	transcript	Y70C5A.3	protein_coding
V	16620471	A	[C]	{A, C}	0.368421	1	TRUE	FALSE	FALSE	0.469492	57	0	21	36	C	missense_variant	MODERATE	Y70C5A.3	WBGene00050904	transcript	Y70C5A.3	protein_coding
V	16620472	A	[T, C]	{A, T}	0.0526316	1	TRUE	FALSE	FALSE	0.100605	57	0	3	54	C	missense_variant	MODERATE	Y70C5A.3	WBGene00050904	transcript	Y70C5A.3	protein_coding
V	16620477	C	[T]	{C, T}	0.315789	1	TRUE	FALSE	TRUE	0.435957	57	0	18	39	T	missense_variant	MODERATE	Y70C5A.3	WBGene00050904	transcript	Y70C5A.3	protein_coding
V	16620478	C	[G]	{G, C}	0.0175439	1	TRUE	FALSE	FALSE	0.0347772	57	0	1	56	G	missense_variant	MODERATE	Y70C5A.3	WBGene00050904	transcript	Y70C5A.3	protein_coding
V	16620486	C	[A]	{A, C}	0.298246	1	TRUE	FALSE	FALSE	0.422295	57	0	17	40	A	missense_variant	MODERATE	Y70C5A.3	WBGene00050904	transcript	Y70C5A.3	protein_coding
V	16620498	C	[T]	{C, T}	0.298246	1	TRUE	FALSE	TRUE	0.422295	57	0	17	40	T	missense_variant	MODERATE	Y70C5A.3	WBGene00050904	transcript	Y70C5A.3	protein_coding
V	16620561	T	[G]	{G, T}	0.368421	1	TRUE	FALSE	FALSE	0.469492	57	0	21	36	G	missense_variant	MODERATE	Y70C5A.3	WBGene00050904	transcript	Y70C5A.3	protein_coding
V	16620594	C	[T]	{C, T}	0.0701754	1	TRUE	FALSE	TRUE	0.131657	57	0	4	53	T	missense_variant	MODERATE	Y70C5A.3	WBGene00050904	transcript	Y70C5A.3	protein_coding
V	16620603	A	[T]	{A, T}	0.350877	1	TRUE	FALSE	FALSE	0.459556	57	0	20	37	T	missense_variant	MODERATE	Y70C5A.3	WBGene00050904	transcript	Y70C5A.3	protein_coding
V	16620604	T	[C]	{C, T}	0.0526316	1	TRUE	FALSE	TRUE	0.100605	57	0	3	54	C	missense_variant	MODERATE	Y70C5A.3	WBGene00050904	transcript	Y70C5A.3	protein_coding
V	16620606	T	[G]	{G, T}	0.298246	1	TRUE	FALSE	FALSE	0.422295	57	0	17	40	G	missense_variant	MODERATE	Y70C5A.3	WBGene00050904	transcript	Y70C5A.3	protein_coding
V	16620607	G	[A]	{G, A}	0.359649	1	TRUE	FALSE	TRUE	0.464679	57	1	20	36	A	missense_variant	MODERATE	Y70C5A.3	WBGene00050904	transcript	Y70C5A.3	protein_coding
V	16620625	G	[A]	{G, A}	0.298246	1	TRUE	FALSE	TRUE	0.422295	57	0	17	40	A	missense_variant	MODERATE	Y70C5A.3	WBGene00050904	transcript	Y70C5A.3	protein_coding
V	16620634	C	[T]	{C, T}	0.0614035	1	TRUE	FALSE	TRUE	0.116286	57	1	3	53	T	missense_variant	MODERATE	Y70C5A.3	WBGene00050904	transcript	Y70C5A.3	protein_coding
V	16620636	G	[T]	{G, T}	0.0789474	1	TRUE	FALSE	FALSE	0.146716	57	1	4	52	T	missense_variant	MODERATE	Y70C5A.3	WBGene00050904	transcript	Y70C5A.3	protein_coding
V	16620637	C	[T]	{C, T}	0.0175439	1	TRUE	FALSE	TRUE	0.0347772	57	0	1	56	T	missense_variant	MODERATE	Y70C5A.3	WBGene00050904	transcript	Y70C5A.3	protein_coding
V	16620667	C	[T]	{C, T}	0.0526316	1	TRUE	FALSE	TRUE	0.100605	57	0	3	54	T	missense_variant	MODERATE	Y70C5A.3	WBGene00050904	transcript	Y70C5A.3	protein_coding
V	16620724	G	[A]	{G, A}	0.0526316	1	TRUE	FALSE	TRUE	0.100605	57	0	3	54	A	missense_variant	MODERATE	Y70C5A.3	WBGene00050904	transcript	Y70C5A.3	protein_coding
V	16620732	G	[A]	{G, A}	0.298246	1	TRUE	FALSE	TRUE	0.422295	57	0	17	40	A	missense_variant	MODERATE	Y70C5A.3	WBGene00050904	transcript	Y70C5A.3	protein_coding
V	16620733	G	[A]	{G, A}	0.298246	1	TRUE	FALSE	TRUE	0.422295	57	0	17	40	A	missense_variant	MODERATE	Y70C5A.3	WBGene00050904	transcript	Y70C5A.3	protein_coding
V	16620750	T	[C]	{C, T}	0.368421	1	TRUE	FALSE	TRUE	0.469492	57	0	21	36	C	missense_variant	MODERATE	Y70C5A.3	WBGene00050904	transcript	Y70C5A.3	protein_coding
V	16620753	C	[T]	{C, T}	0.298246	1	TRUE	FALSE	TRUE	0.422295	57	0	17	40	T	missense_variant	MODERATE	Y70C5A.3	WBGene00050904	transcript	Y70C5A.3	protein_coding
V	16620757	C	[T]	{C, T}	0.122807	1	TRUE	FALSE	TRUE	0.217358	57	0	7	50	T	missense_variant	MODERATE	Y70C5A.3	WBGene00050904	transcript	Y70C5A.3	protein_coding
V	16620778	C	[T]	{C, T}	0.0701754	1	TRUE	FALSE	TRUE	0.131657	57	0	4	53	T	missense_variant	MODERATE	Y70C5A.3	WBGene00050904	transcript	Y70C5A.3	protein_coding
V	16620781	T	[A]	{A, T}	0.185185	0.947368	TRUE	FALSE	FALSE	0.304604	54	0	10	44	A	missense_variant	MODERATE	Y70C5A.3	WBGene00050904	transcript	Y70C5A.3	protein_coding
V	16620783	T	[G, A]	{G, A, T}	0.037037	0.947368	TRUE	FALSE	FALSE	0.0719972	54	0	2	52	A	missense_variant	MODERATE	Y70C5A.3	WBGene00050904	transcript	Y70C5A.3	protein_coding
V	16620784	C	[A, T]	{A, C}	0.203704	0.947368	TRUE	FALSE	FALSE	0.327449	54	0	11	43	A	missense_variant	MODERATE	Y70C5A.3	WBGene00050904	transcript	Y70C5A.3	protein_coding
V	16620789	G	[C]	{G, C}	0.185185	0.947368	TRUE	FALSE	FALSE	0.304604	54	0	10	44	C	missense_variant	MODERATE	Y70C5A.3	WBGene00050904	transcript	Y70C5A.3	protein_coding
V	16620792	G	[C]	{G, C}	0.175926	0.947368	TRUE	FALSE	FALSE	0.292662	54	1	9	44	C	missense_variant	MODERATE	Y70C5A.3	WBGene00050904	transcript	Y70C5A.3	protein_coding
V	16620820	T	[C]	{C, T}	0.368421	1	TRUE	FALSE	TRUE	0.469492	57	0	21	36	C	missense_variant	MODERATE	Y70C5A.3	WBGene00050904	transcript	Y70C5A.3	protein_coding
V	16620822	T	[C]	{C, T}	0.298246	1	TRUE	FALSE	TRUE	0.422295	57	0	17	40	C	missense_variant	MODERATE	Y70C5A.3	WBGene00050904	transcript	Y70C5A.3	protein_coding
V	16620849	A	[T]	{A, T}	0.298246	1	TRUE	FALSE	FALSE	0.422295	57	0	17	40	T	missense_variant	MODERATE	Y70C5A.3	WBGene00050904	transcript	Y70C5A.3	protein_coding
V	16620850	C	[T]	{C, T}	0.298246	1	TRUE	FALSE	TRUE	0.422295	57	0	17	40	T	missense_variant	MODERATE	Y70C5A.3	WBGene00050904	transcript	Y70C5A.3	protein_coding
V	16620852	G	[C]	{G, C}	0.298246	1	TRUE	FALSE	FALSE	0.422295	57	0	17	40	C	missense_variant	MODERATE	Y70C5A.3	WBGene00050904	transcript	Y70C5A.3	protein_coding
V	16620853	A	[G, T]	{G, A}	0.298246	1	TRUE	FALSE	FALSE	0.422295	57	0	17	40	G	missense_variant	MODERATE	Y70C5A.3	WBGene00050904	transcript	Y70C5A.3	protein_coding
V	16620861	G	[A, T]	{G, A}	0.307018	1	TRUE	FALSE	FALSE	0.429281	57	1	17	39	A	missense_variant	MODERATE	Y70C5A.3	WBGene00050904	transcript	Y70C5A.3	protein_coding
V	16620871	T	[A]	{A, T}	0.307018	1	TRUE	FALSE	FALSE	0.429281	57	1	17	39	A	missense_variant	MODERATE	Y70C5A.3	WBGene00050904	transcript	Y70C5A.3	protein_coding
V	16621446	C	[T]	{C, T}	0.298246	1	TRUE	FALSE	TRUE	0.422295	57	0	17	40	T	missense_variant	MODERATE	Y70C5A.2	WBGene00013490	transcript	Y70C5A.2	protein_coding
V	16621581	G	[T]	{G, T}	0.368421	1	TRUE	FALSE	FALSE	0.469492	57	0	21	36	T	missense_variant	MODERATE	Y70C5A.2	WBGene00013490	transcript	Y70C5A.2	protein_coding
V	16621605	G	[A]	{G, A}	0.421053	1	TRUE	FALSE	TRUE	0.491849	57	0	24	33	A	missense_variant	MODERATE	Y70C5A.2	WBGene00013490	transcript	Y70C5A.2	protein_coding
V	16621614	T	[A]	{A, T}	0.0175439	1	TRUE	FALSE	FALSE	0.0347772	57	0	1	56	A	missense_variant	MODERATE	Y70C5A.2	WBGene00013490	transcript	Y70C5A.2	protein_coding
V	16621648	T	[G, A]	{G, A, T}	0.0888889	0.789474	TRUE	FALSE	FALSE	0.163795	45	0	4	41	A	missense_variant	MODERATE	Y70C5A.2	WBGene00013490	transcript	Y70C5A.2	protein_coding
V	16621653	T	[G]	{G, T}	0.178571	0.736842	TRUE	FALSE	FALSE	0.296902	42	1	7	34	G	missense_variant	MODERATE	Y70C5A.2	WBGene00013490	transcript	Y70C5A.2	protein_coding
V	16621738	C	[T]	{C, T}	0.0526316	1	TRUE	FALSE	TRUE	0.100605	57	0	3	54	T	missense_variant	MODERATE	Y70C5A.2	WBGene00013490	transcript	Y70C5A.2	protein_coding
V	16621765	T	[C]	{C, T}	0.0526316	1	TRUE	FALSE	TRUE	0.100605	57	0	3	54	C	missense_variant	MODERATE	Y70C5A.2	WBGene00013490	transcript	Y70C5A.2	protein_coding
V	16621930	T	[C]	{C, T}	0.0526316	1	TRUE	FALSE	TRUE	0.100605	57	0	3	54	C	missense_variant	MODERATE	Y70C5A.2	WBGene00013490	transcript	Y70C5A.2	protein_coding
V	16621978	T	[C]	{C, T}	0.421053	1	TRUE	FALSE	TRUE	0.491849	57	0	24	33	C	missense_variant	MODERATE	Y70C5A.2	WBGene00013490	transcript	Y70C5A.2	protein_coding
V	16622366	G	[T]	{G, T}	0.0526316	1	TRUE	FALSE	FALSE	0.100605	57	0	3	54	T	missense_variant	MODERATE	Y70C5A.2	WBGene00013490	transcript	Y70C5A.2	protein_coding
V	16622442	C	[T]	{C, T}	0.438596	1	TRUE	FALSE	TRUE	0.496817	57	0	25	32	T	missense_variant	MODERATE	Y70C5A.2	WBGene00013490	transcript	Y70C5A.2	protein_coding
V	16622488	C	[A, T]	{A, C}	0.0178571	0.982456	TRUE	FALSE	FALSE	0.0353925	56	0	1	55	A	missense_variant	MODERATE	Y70C5A.2	WBGene00013490	transcript	Y70C5A.2	protein_coding
V	16622691	T	[G]	{G, T}	0.0701754	1	TRUE	FALSE	FALSE	0.131657	57	0	4	53	G	missense_variant	MODERATE	Y70C5A.2	WBGene00013490	transcript	Y70C5A.2	protein_coding
V	16622780	C	[T]	{C, T}	0.0526316	1	TRUE	FALSE	TRUE	0.100605	57	0	3	54	T	missense_variant	MODERATE	Y70C5A.2	WBGene00013490	transcript	Y70C5A.2	protein_coding
V	16622787	A	[G, T]	{G, A}	0.122807	1	TRUE	FALSE	FALSE	0.217358	57	0	7	50	T	missense_variant&splice_region_variant	MODERATE	Y70C5A.2	WBGene00013490	transcript	Y70C5A.2	protein_coding
V	16623133	G	[A, C]	{G, A, C}	0.0701754	1	TRUE	FALSE	FALSE	0.131657	57	0	4	53	A	missense_variant	MODERATE	Y70C5A.2	WBGene00013490	transcript	Y70C5A.2	protein_coding
V	16623163	C	[G]	{G, C}	0.0526316	1	TRUE	FALSE	FALSE	0.100605	57	0	3	54	G	missense_variant	MODERATE	Y70C5A.2	WBGene00013490	transcript	Y70C5A.2	protein_coding
V	16624043	T	[C]	{C, T}	0.0701754	1	TRUE	FALSE	TRUE	0.131657	57	0	4	53	C	missense_variant	MODERATE	oac-53	WBGene00012308	transcript	W06G6.1	protein_coding
V	16624126	C	[T]	{C, T}	0.122807	1	TRUE	FALSE	TRUE	0.217358	57	0	7	50	T	missense_variant	MODERATE	oac-53	WBGene00012308	transcript	W06G6.1	protein_coding
V	16624138	G	[T, C]	{G, C, T}	0.105263	1	TRUE	FALSE	FALSE	0.190033	57	0	6	51	C	missense_variant	MODERATE	oac-53	WBGene00012308	transcript	W06G6.1	protein_coding
V	16624145	C	[A]	{A, C}	0.0526316	1	TRUE	FALSE	FALSE	0.100605	57	0	3	54	A	missense_variant	MODERATE	oac-53	WBGene00012308	transcript	W06G6.1	protein_coding
V	16624244	A	[G]	{G, A}	0.0175439	1	TRUE	FALSE	TRUE	0.0347772	57	0	1	56	G	missense_variant	MODERATE	oac-53	WBGene00012308	transcript	W06G6.1	protein_coding
V	16624302	T	[A]	{A, T}	0.0175439	1	TRUE	FALSE	FALSE	0.0347772	57	0	1	56	A	missense_variant	MODERATE	oac-53	WBGene00012308	transcript	W06G6.1	protein_coding
V	16624918	G	[T]	{G, T}	0.0175439	1	TRUE	FALSE	FALSE	0.0347772	57	0	1	56	T	missense_variant	MODERATE	oac-53	WBGene00012308	transcript	W06G6.1	protein_coding
V	16624988	T	[C, A]	{C, T}	0.0526316	1	TRUE	FALSE	FALSE	0.100605	57	0	3	54	A	missense_variant	MODERATE	oac-53	WBGene00012308	transcript	W06G6.1	protein_coding
V	16625125	G	[A]	{G, A}	0.0175439	1	TRUE	FALSE	TRUE	0.0347772	57	0	1	56	A	missense_variant	MODERATE	oac-53	WBGene00012308	transcript	W06G6.1	protein_coding
V	16625129	C	[T]	{C, T}	0.0175439	1	TRUE	FALSE	TRUE	0.0347772	57	0	1	56	T	missense_variant	MODERATE	oac-53	WBGene00012308	transcript	W06G6.1	protein_coding
V	16625199	T	[A, C]	{A, C, T}	0.385965	1	TRUE	FALSE	FALSE	0.478187	57	0	22	35	A	missense_variant	MODERATE	oac-53	WBGene00012308	transcript	W06G6.1	protein_coding
V	16625221	A	[C]	{A, C}	0.0175439	1	TRUE	FALSE	FALSE	0.0347772	57	0	1	56	C	missense_variant	MODERATE	oac-53	WBGene00012308	transcript	W06G6.1	protein_coding
V	16625263	G	[A, C]	{G, A}	0.0526316	1	TRUE	FALSE	FALSE	0.100605	57	0	3	54	A	missense_variant	MODERATE	oac-53	WBGene00012308	transcript	W06G6.1	protein_coding
V	16625276	C	[A]	{A, C}	0.315789	1	TRUE	FALSE	FALSE	0.435957	57	0	18	39	A	missense_variant	MODERATE	oac-53	WBGene00012308	transcript	W06G6.1	protein_coding
V	16625283	A	[T]	{A, T}	0.438596	1	TRUE	FALSE	FALSE	0.496817	57	0	25	32	T	missense_variant	MODERATE	oac-53	WBGene00012308	transcript	W06G6.1	protein_coding
V	16625307	A	[T]	{A, T}	0.0535714	0.982456	TRUE	FALSE	FALSE	0.102317	56	0	3	53	T	missense_variant	MODERATE	oac-53	WBGene00012308	transcript	W06G6.1	protein_coding
V	16625308	T	[G]	{G, T}	0.428571	0.982456	TRUE	FALSE	FALSE	0.494208	56	0	24	32	G	missense_variant	MODERATE	oac-53	WBGene00012308	transcript	W06G6.1	protein_coding
V	16625721	T	[A]	{A, T}	0.175439	1	TRUE	FALSE	FALSE	0.29188	57	0	10	47	A	missense_variant	MODERATE	oac-53	WBGene00012308	transcript	W06G6.1	protein_coding
V	16625918	G	[C]	{G, C}	0.0526316	1	TRUE	FALSE	FALSE	0.100605	57	0	3	54	C	missense_variant	MODERATE	oac-53	WBGene00012308	transcript	W06G6.1	protein_coding
V	16625988	T	[G]	{G, T}	0.368421	1	TRUE	FALSE	FALSE	0.469492	57	0	21	36	G	missense_variant	MODERATE	oac-53	WBGene00012308	transcript	W06G6.1	protein_coding
V	16626101	A	[G]	{G, A}	0.0526316	1	TRUE	FALSE	TRUE	0.100605	57	0	3	54	G	missense_variant	MODERATE	oac-53	WBGene00012308	transcript	W06G6.1	protein_coding
V	16626200	G	[C]	{G, C}	0.0526316	1	TRUE	FALSE	FALSE	0.100605	57	0	3	54	C	missense_variant	MODERATE	oac-53	WBGene00012308	transcript	W06G6.1	protein_coding
V	16626201	A	[G]	{G, A}	0.0526316	1	TRUE	FALSE	TRUE	0.100605	57	0	3	54	G	missense_variant	MODERATE	oac-53	WBGene00012308	transcript	W06G6.1	protein_coding
V	16626262	G	[A, T]	{G, A, T}	0.105263	1	TRUE	FALSE	FALSE	0.190033	57	0	6	51	T	missense_variant	MODERATE	oac-53	WBGene00012308	transcript	W06G6.1	protein_coding
V	16626347	A	[C]	{A, C}	0.0526316	1	TRUE	FALSE	FALSE	0.100605	57	0	3	54	C	missense_variant	MODERATE	oac-53	WBGene00012308	transcript	W06G6.1	protein_coding
V	16626535	A	[C, G]	{A, C}	0.307018	1	TRUE	FALSE	FALSE	0.429281	57	1	17	39	C	missense_variant	MODERATE	oac-53	WBGene00012308	transcript	W06G6.1	protein_coding
V	16626537	A	[G]	{G, A}	0.438596	1	TRUE	FALSE	TRUE	0.496817	57	0	25	32	G	missense_variant	MODERATE	oac-53	WBGene00012308	transcript	W06G6.1	protein_coding
V	16626564	C	[T]	{C, T}	0.163636	0.964912	TRUE	FALSE	TRUE	0.27623	55	0	9	46	T	missense_variant	MODERATE	oac-53	WBGene00012308	transcript	W06G6.1	protein_coding
V	16626581	G	[A]	{G, A}	0.0545455	0.964912	TRUE	FALSE	TRUE	0.104087	55	0	3	52	A	missense_variant	MODERATE	oac-53	WBGene00012308	transcript	W06G6.1	protein_coding
V	16626582	T	[C]	{C, T}	0.0625	0.842105	TRUE	FALSE	TRUE	0.118421	48	0	3	45	C	missense_variant	MODERATE	oac-53	WBGene00012308	transcript	W06G6.1	protein_coding
V	16626626	C	[G]	{G, C}	0.0526316	1	TRUE	FALSE	FALSE	0.100605	57	0	3	54	G	missense_variant	MODERATE	oac-53	WBGene00012308	transcript	W06G6.1	protein_coding
V	16626627	T	[A]	{A, T}	0.122807	1	TRUE	FALSE	FALSE	0.217358	57	0	7	50	A	missense_variant	MODERATE	oac-53	WBGene00012308	transcript	W06G6.1	protein_coding
V	16626648	T	[C]	{C, T}	0.0526316	1	TRUE	FALSE	TRUE	0.100605	57	0	3	54	C	missense_variant&splice_region_variant	MODERATE	oac-53	WBGene00012308	transcript	W06G6.1	protein_coding
V	16627069	G	[T]	{G, T}	0.122807	1	TRUE	FALSE	FALSE	0.217358	57	0	7	50	T	missense_variant	MODERATE	oac-53	WBGene00012308	transcript	W06G6.1	protein_coding
V	16627096	T	[C]	{C, T}	0.0701754	1	TRUE	FALSE	TRUE	0.131657	57	0	4	53	C	missense_variant	MODERATE	oac-53	WBGene00012308	transcript	W06G6.1	protein_coding
V	16627267	G	[T]	{G, T}	0.0350877	1	TRUE	FALSE	FALSE	0.0683124	57	0	2	55	T	missense_variant	MODERATE	oac-53	WBGene00012308	transcript	W06G6.1	protein_coding
V	16627276	G	[C]	{G, C}	0.0526316	1	TRUE	FALSE	FALSE	0.100605	57	0	3	54	C	missense_variant	MODERATE	oac-53	WBGene00012308	transcript	W06G6.1	protein_coding
V	16627430	A	[G]	{G, A}	0.122807	1	TRUE	FALSE	TRUE	0.217358	57	0	7	50	G	missense_variant	MODERATE	oac-53	WBGene00012308	transcript	W06G6.1	protein_coding
V	16627497	A	[C]	{A, C}	0.0701754	1	TRUE	FALSE	FALSE	0.131657	57	0	4	53	C	missense_variant	MODERATE	oac-53	WBGene00012308	transcript	W06G6.1	protein_coding
V	16627503	C	[T]	{C, T}	0.0526316	1	TRUE	FALSE	TRUE	0.100605	57	0	3	54	T	missense_variant	MODERATE	oac-53	WBGene00012308	transcript	W06G6.1	protein_coding
V	16627506	C	[G]	{G, C}	0.122807	1	TRUE	FALSE	FALSE	0.217358	57	0	7	50	G	missense_variant	MODERATE	oac-53	WBGene00012308	transcript	W06G6.1	protein_coding
V	16627511	G	[A]	{G, A}	0.0701754	1	TRUE	FALSE	TRUE	0.131657	57	0	4	53	A	missense_variant	MODERATE	oac-53	WBGene00012308	transcript	W06G6.1	protein_coding
V	16627533	G	[A, T]	{G, A, T}	0.122807	1	TRUE	FALSE	FALSE	0.217358	57	0	7	50	T	missense_variant	MODERATE	oac-53	WBGene00012308	transcript	W06G6.1	protein_coding
V	16627583	G	[T, A]	{G, T}	0.298246	1	TRUE	FALSE	FALSE	0.422295	57	0	17	40	A	missense_variant	MODERATE	oac-53	WBGene00012308	transcript	W06G6.1	protein_coding
V	16627912	T	[C]	{C, T}	0.0701754	1	TRUE	FALSE	TRUE	0.131657	57	0	4	53	C	missense_variant&splice_region_variant	MODERATE	oac-53	WBGene00012308	transcript	W06G6.1	protein_coding
V	16627925	G	[C]	{G, C}	0.122807	1	TRUE	FALSE	FALSE	0.217358	57	0	7	50	C	missense_variant	MODERATE	oac-53	WBGene00012308	transcript	W06G6.1	protein_coding
V	16627946	A	[T]	{A, T}	0.0526316	1	TRUE	FALSE	FALSE	0.100605	57	0	3	54	T	missense_variant	MODERATE	oac-53	WBGene00012308	transcript	W06G6.1	protein_coding
V	16629322	A	[C]	{A, C}	0.0526316	1	TRUE	FALSE	FALSE	0.100605	57	0	3	54	C	missense_variant	MODERATE	W06G6.2	WBGene00012309	transcript	W06G6.2	protein_coding
V	16629336	A	[T]	{A, T}	0.140351	1	TRUE	FALSE	FALSE	0.24344	57	0	8	49	T	missense_variant	MODERATE	W06G6.2	WBGene00012309	transcript	W06G6.2	protein_coding
V	16629392	C	[A]	{A, C}	0.0526316	1	TRUE	FALSE	FALSE	0.100605	57	0	3	54	A	missense_variant	MODERATE	W06G6.2	WBGene00012309	transcript	W06G6.2	protein_coding
V	16629404	A	[C, G]	{A, C}	0.0526316	1	TRUE	FALSE	FALSE	0.100605	57	0	3	54	C	missense_variant	MODERATE	W06G6.2	WBGene00012309	transcript	W06G6.2	protein_coding
V	16629408	T	[G]	{G, T}	0.0526316	1	TRUE	FALSE	FALSE	0.100605	57	0	3	54	G	missense_variant	MODERATE	W06G6.2	WBGene00012309	transcript	W06G6.2	protein_coding
V	16629504	T	[C]	{C, T}	0.0526316	1	TRUE	FALSE	TRUE	0.100605	57	0	3	54	C	missense_variant	MODERATE	W06G6.2	WBGene00012309	transcript	W06G6.2	protein_coding
V	16629525	C	[T]	{C, T}	0.0526316	1	TRUE	FALSE	TRUE	0.100605	57	0	3	54	T	missense_variant	MODERATE	W06G6.2	WBGene00012309	transcript	W06G6.2	protein_coding
V	16629528	A	[G]	{G, A}	0.122807	1	TRUE	FALSE	TRUE	0.217358	57	0	7	50	G	missense_variant&splice_region_variant	MODERATE	W06G6.2	WBGene00012309	transcript	W06G6.2	protein_coding
V	16629644	A	[T]	{A, T}	0.122807	1	TRUE	FALSE	FALSE	0.217358	57	0	7	50	T	missense_variant	MODERATE	W06G6.2	WBGene00012309	transcript	W06G6.2	protein_coding
V	16629645	C	[G]	{G, C}	0.0350877	1	TRUE	FALSE	FALSE	0.0683124	57	0	2	55	G	missense_variant	MODERATE	W06G6.2	WBGene00012309	transcript	W06G6.2	protein_coding
V	16629918	C	[A]	{A, C}	0.0350877	1	TRUE	FALSE	FALSE	0.0683124	57	0	2	55	A	missense_variant	MODERATE	srd-21	WBGene00005099	transcript	W06G6.3	protein_coding
V	16629924	G	[T]	{G, T}	0.122807	1	TRUE	FALSE	FALSE	0.217358	57	0	7	50	T	missense_variant	MODERATE	srd-21	WBGene00005099	transcript	W06G6.3	protein_coding
V	16629933	G	[A]	{G, A}	0.0175439	1	TRUE	FALSE	TRUE	0.0347772	57	0	1	56	A	missense_variant	MODERATE	srd-21	WBGene00005099	transcript	W06G6.3	protein_coding
V	16629937	C	[T]	{C, T}	0.122807	1	TRUE	FALSE	TRUE	0.217358	57	0	7	50	T	missense_variant	MODERATE	srd-21	WBGene00005099	transcript	W06G6.3	protein_coding
V	16630024	TAAAGTCAACGAC	[T]	{TAAAGTCAACGAC, T}	0.0175439	1	FALSE	TRUE	FALSE	0.0347772	57	0	1	56	T	conservative_inframe_deletion	MODERATE	srd-21	WBGene00005099	transcript	W06G6.3	protein_coding
V	16630043	G	[C]	{G, C}	0.0350877	1	TRUE	FALSE	FALSE	0.0683124	57	0	2	55	C	missense_variant	MODERATE	srd-21	WBGene00005099	transcript	W06G6.3	protein_coding
V	16630148	A	[G]	{G, A}	0.122807	1	TRUE	FALSE	TRUE	0.217358	57	0	7	50	G	missense_variant	MODERATE	srd-21	WBGene00005099	transcript	W06G6.3	protein_coding
V	16630176	G	[T]	{G, T}	0.122807	1	TRUE	FALSE	FALSE	0.217358	57	0	7	50	T	missense_variant	MODERATE	srd-21	WBGene00005099	transcript	W06G6.3	protein_coding
V	16630177	T	[A]	{A, T}	0.122807	1	TRUE	FALSE	FALSE	0.217358	57	0	7	50	A	missense_variant	MODERATE	srd-21	WBGene00005099	transcript	W06G6.3	protein_coding
V	16630197	G	[A]	{G, A}	0.0175439	1	TRUE	FALSE	TRUE	0.0347772	57	0	1	56	A	missense_variant	MODERATE	srd-21	WBGene00005099	transcript	W06G6.3	protein_coding
V	16630331	G	[A]	{G, A}	0.122807	1	TRUE	FALSE	TRUE	0.217358	57	0	7	50	A	missense_variant	MODERATE	srd-21	WBGene00005099	transcript	W06G6.3	protein_coding
V	16630334	A	[T]	{A, T}	0.0175439	1	TRUE	FALSE	FALSE	0.0347772	57	0	1	56	T	missense_variant	MODERATE	srd-21	WBGene00005099	transcript	W06G6.3	protein_coding
V	16630437	G	[A]	{G, A}	0.122807	1	TRUE	FALSE	TRUE	0.217358	57	0	7	50	A	missense_variant	MODERATE	srd-21	WBGene00005099	transcript	W06G6.3	protein_coding
V	16630480	G	[A, T]	{G, T}	0.0526316	1	TRUE	FALSE	FALSE	0.100605	57	0	3	54	A	missense_variant	MODERATE	srd-21	WBGene00005099	transcript	W06G6.3	protein_coding
V	16630518	C	[T]	{C, T}	0.0175439	1	TRUE	FALSE	TRUE	0.0347772	57	0	1	56	T	missense_variant	MODERATE	srd-21	WBGene00005099	transcript	W06G6.3	protein_coding
V	16630936	C	[G]	{G, C}	0.122807	1	TRUE	FALSE	FALSE	0.217358	57	0	7	50	G	missense_variant	MODERATE	srd-21	WBGene00005099	transcript	W06G6.3	protein_coding
V	16630950	C	[T]	{C, T}	0.122807	1	TRUE	FALSE	TRUE	0.217358	57	0	7	50	T	missense_variant	MODERATE	srd-21	WBGene00005099	transcript	W06G6.3	protein_coding
V	16630959	G	[A]	{G, A}	0.122807	1	TRUE	FALSE	TRUE	0.217358	57	0	7	50	A	missense_variant	MODERATE	srd-21	WBGene00005099	transcript	W06G6.3	protein_coding
V	16630988	G	[A]	{G, A}	0.122807	1	TRUE	FALSE	TRUE	0.217358	57	0	7	50	A	missense_variant	MODERATE	srd-21	WBGene00005099	transcript	W06G6.3	protein_coding
V	16636932	A	[G]	{G, A}	0.0175439	1	TRUE	FALSE	TRUE	0.0347772	57	0	1	56	G	missense_variant	MODERATE	srw-76	WBGene00005823	transcript	W06G6.6	protein_coding
V	16636940	C	[T]	{C, T}	0.22807	1	TRUE	FALSE	TRUE	0.355224	57	0	13	44	T	missense_variant	MODERATE	srw-76	WBGene00005823	transcript	W06G6.6	protein_coding
V	16637050	T	[A]	{A, T}	0.0175439	1	TRUE	FALSE	FALSE	0.0347772	57	0	1	56	A	missense_variant	MODERATE	srw-76	WBGene00005823	transcript	W06G6.6	protein_coding
V	16637060	A	[C]	{A, C}	0.0175439	1	TRUE	FALSE	FALSE	0.0347772	57	0	1	56	C	missense_variant	MODERATE	srw-76	WBGene00005823	transcript	W06G6.6	protein_coding
V	16637143	T	[C]	{C, T}	0.0350877	1	TRUE	FALSE	TRUE	0.0683124	57	0	2	55	C	missense_variant	MODERATE	srw-76	WBGene00005823	transcript	W06G6.6	protein_coding
V	16637559	T	[C]	{C, T}	0.0701754	1	TRUE	FALSE	TRUE	0.131657	57	0	4	53	C	missense_variant	MODERATE	srw-76	WBGene00005823	transcript	W06G6.6	protein_coding
V	16637580	T	[C]	{C, T}	0.0701754	1	TRUE	FALSE	TRUE	0.131657	57	0	4	53	C	missense_variant	MODERATE	srw-76	WBGene00005823	transcript	W06G6.6	protein_coding
V	16637681	T	[C]	{C, T}	0.0877193	1	TRUE	FALSE	TRUE	0.161466	57	0	5	52	C	missense_variant	MODERATE	srw-76	WBGene00005823	transcript	W06G6.6	protein_coding
V	16637933	A	[C]	{A, C}	0.0701754	1	TRUE	FALSE	FALSE	0.131657	57	0	4	53	C	missense_variant	MODERATE	srw-76	WBGene00005823	transcript	W06G6.6	protein_coding
V	16638124	C	[T]	{C, T}	0.0701754	1	TRUE	FALSE	TRUE	0.131657	57	0	4	53	T	missense_variant	MODERATE	srw-76	WBGene00005823	transcript	W06G6.6	protein_coding
V	16638150	A	[G]	{G, A}	0.0175439	1	TRUE	FALSE	TRUE	0.0347772	57	0	1	56	G	missense_variant	MODERATE	srw-76	WBGene00005823	transcript	W06G6.6	protein_coding
V	16638159	T	[G]	{G, T}	0.0701754	1	TRUE	FALSE	FALSE	0.131657	57	0	4	53	G	missense_variant	MODERATE	srw-76	WBGene00005823	transcript	W06G6.6	protein_coding
V	16638211	G	[T]	{G, T}	0.0701754	1	TRUE	FALSE	FALSE	0.131657	57	0	4	53	T	missense_variant	MODERATE	srw-76	WBGene00005823	transcript	W06G6.6	protein_coding
V	16638218	A	[C]	{A, C}	0.0701754	1	TRUE	FALSE	FALSE	0.131657	57	0	4	53	C	missense_variant	MODERATE	srw-76	WBGene00005823	transcript	W06G6.6	protein_coding
V	16638250	T	[C]	{C, T}	0.0701754	1	TRUE	FALSE	TRUE	0.131657	57	0	4	53	C	missense_variant	MODERATE	srw-76	WBGene00005823	transcript	W06G6.6	protein_coding
V	16638274	G	[T]	{G, T}	0.0526316	1	TRUE	FALSE	FALSE	0.100605	57	0	3	54	T	missense_variant	MODERATE	srw-76	WBGene00005823	transcript	W06G6.6	protein_coding
V	16638292	G	[C]	{G, C}	0.0701754	1	TRUE	FALSE	FALSE	0.131657	57	0	4	53	C	missense_variant	MODERATE	srw-76	WBGene00005823	transcript	W06G6.6	protein_coding
V	16638296	C	[G]	{G, C}	0.0701754	1	TRUE	FALSE	FALSE	0.131657	57	0	4	53	G	missense_variant	MODERATE	srw-76	WBGene00005823	transcript	W06G6.6	protein_coding
V	16638297	T	[C]	{C, T}	0.0701754	1	TRUE	FALSE	TRUE	0.131657	57	0	4	53	C	missense_variant	MODERATE	srw-76	WBGene00005823	transcript	W06G6.6	protein_coding
V	16639020	A	[G]	{G, A}	0.122807	1	TRUE	FALSE	TRUE	0.217358	57	0	7	50	G	missense_variant	MODERATE	mltn-11	WBGene00012310	transcript	W06G6.7	protein_coding
V	16639036	C	[T]	{C, T}	0.0701754	1	TRUE	FALSE	TRUE	0.131657	57	0	4	53	T	missense_variant	MODERATE	mltn-11	WBGene00012310	transcript	W06G6.7	protein_coding
V	16639141	A	[T]	{A, T}	0.0701754	1	TRUE	FALSE	FALSE	0.131657	57	0	4	53	T	missense_variant	MODERATE	mltn-11	WBGene00012310	transcript	W06G6.7	protein_coding
V	16639159	T	[A]	{A, T}	0.0701754	1	TRUE	FALSE	FALSE	0.131657	57	0	4	53	A	missense_variant	MODERATE	mltn-11	WBGene00012310	transcript	W06G6.7	protein_coding
V	16639195	G	[T]	{G, T}	0.0701754	1	TRUE	FALSE	FALSE	0.131657	57	0	4	53	T	missense_variant	MODERATE	mltn-11	WBGene00012310	transcript	W06G6.7	protein_coding
V	16639212	C	[A]	{A, C}	0.0701754	1	TRUE	FALSE	FALSE	0.131657	57	0	4	53	A	missense_variant	MODERATE	mltn-11	WBGene00012310	transcript	W06G6.7	protein_coding
V	16639220	T	[G]	{G, T}	0.0701754	1	TRUE	FALSE	FALSE	0.131657	57	0	4	53	G	missense_variant	MODERATE	mltn-11	WBGene00012310	transcript	W06G6.7	protein_coding
V	16639236	G	[A]	{G, A}	0.0701754	1	TRUE	FALSE	TRUE	0.131657	57	0	4	53	A	missense_variant	MODERATE	mltn-11	WBGene00012310	transcript	W06G6.7	protein_coding
V	16639295	C	[A]	{A, C}	0.0701754	1	TRUE	FALSE	FALSE	0.131657	57	0	4	53	A	missense_variant	MODERATE	mltn-11	WBGene00012310	transcript	W06G6.7	protein_coding
V	16639297	C	[A]	{A, C}	0.0701754	1	TRUE	FALSE	FALSE	0.131657	57	0	4	53	A	missense_variant	MODERATE	mltn-11	WBGene00012310	transcript	W06G6.7	protein_coding
V	16639301	T	[G]	{G, T}	0.0701754	1	TRUE	FALSE	FALSE	0.131657	57	0	4	53	G	missense_variant	MODERATE	mltn-11	WBGene00012310	transcript	W06G6.7	protein_coding
V	16639420	C	[T]	{C, T}	0.122807	1	TRUE	FALSE	TRUE	0.217358	57	0	7	50	T	missense_variant	MODERATE	mltn-11	WBGene00012310	transcript	W06G6.7	protein_coding
V	16640000	T	[A]	{A, T}	0.0784314	0.894737	TRUE	FALSE	FALSE	0.145991	51	0	4	47	A	missense_variant	MODERATE	mltn-11	WBGene00012310	transcript	W06G6.7	protein_coding
V	16640010	C	[G]	{G, C}	0.0784314	0.894737	TRUE	FALSE	FALSE	0.145991	51	0	4	47	G	missense_variant	MODERATE	mltn-11	WBGene00012310	transcript	W06G6.7	protein_coding
V	16640087	A	[G]	{G, A}	0.0784314	0.894737	TRUE	FALSE	TRUE	0.145991	51	0	4	47	G	missense_variant	MODERATE	mltn-11	WBGene00012310	transcript	W06G6.7	protein_coding
V	16640177	C	[A]	{A, C}	0.08	0.877193	TRUE	FALSE	FALSE	0.148687	50	0	4	46	A	missense_variant	MODERATE	mltn-11	WBGene00012310	transcript	W06G6.7	protein_coding
V	16640178	A	[T]	{A, T}	0.08	0.877193	TRUE	FALSE	FALSE	0.148687	50	0	4	46	T	missense_variant	MODERATE	mltn-11	WBGene00012310	transcript	W06G6.7	protein_coding
V	16640187	A	[G]	{G, A}	0.08	0.877193	TRUE	FALSE	TRUE	0.148687	50	0	4	46	G	missense_variant	MODERATE	mltn-11	WBGene00012310	transcript	W06G6.7	protein_coding
V	16640217	G	[A]	{G, A}	0.08	0.877193	TRUE	FALSE	TRUE	0.148687	50	0	4	46	A	missense_variant	MODERATE	mltn-11	WBGene00012310	transcript	W06G6.7	protein_coding
V	16640283	A	[G]	{G, A}	0.0392157	0.894737	TRUE	FALSE	TRUE	0.0761017	51	0	2	49	G	missense_variant	MODERATE	mltn-11	WBGene00012310	transcript	W06G6.7	protein_coding
V	16640290	T	[A]	{A, T}	0.0784314	0.894737	TRUE	FALSE	FALSE	0.145991	51	0	4	47	A	missense_variant	MODERATE	mltn-11	WBGene00012310	transcript	W06G6.7	protein_coding
V	16640360	G	[A]	{G, A}	0.08	0.877193	TRUE	FALSE	TRUE	0.148687	50	0	4	46	A	missense_variant	MODERATE	mltn-11	WBGene00012310	transcript	W06G6.7	protein_coding
V	16640384	A	[G]	{G, A}	0.0769231	0.912281	TRUE	FALSE	TRUE	0.143391	52	0	4	48	G	missense_variant	MODERATE	mltn-11	WBGene00012310	transcript	W06G6.7	protein_coding
V	16640393	A	[C]	{A, C}	0.115385	0.912281	TRUE	FALSE	FALSE	0.206124	52	0	6	46	C	missense_variant	MODERATE	mltn-11	WBGene00012310	transcript	W06G6.7	protein_coding
V	16640403	C	[T]	{C, T}	0.037037	0.947368	TRUE	FALSE	TRUE	0.0719972	54	0	2	52	T	missense_variant	MODERATE	mltn-11	WBGene00012310	transcript	W06G6.7	protein_coding
V	16640405	A	[G]	{G, A}	0.0185185	0.947368	TRUE	FALSE	TRUE	0.0366909	54	0	1	53	G	missense_variant	MODERATE	mltn-11	WBGene00012310	transcript	W06G6.7	protein_coding
V	16640410	G	[A, C]	{G, A}	0.0740741	0.947368	TRUE	FALSE	FALSE	0.138456	54	0	4	50	C	missense_variant	MODERATE	mltn-11	WBGene00012310	transcript	W06G6.7	protein_coding
V	16641203	G	[A]	{G, A}	0.0178571	0.982456	TRUE	FALSE	TRUE	0.0353925	56	0	1	55	A	missense_variant	MODERATE	mltn-11	WBGene00012310	transcript	W06G6.7	protein_coding
V	16641254	C	[T]	{C, T}	0.0714286	0.982456	TRUE	FALSE	TRUE	0.133848	56	0	4	52	T	missense_variant	MODERATE	mltn-11	WBGene00012310	transcript	W06G6.7	protein_coding
V	16641458	C	[A]	{A, C}	0.0535714	0.982456	TRUE	FALSE	FALSE	0.102317	56	0	3	53	A	missense_variant	MODERATE	mltn-11	WBGene00012310	transcript	W06G6.7	protein_coding
V	16641855	T	[G]	{G, T}	0.236364	0.964912	TRUE	FALSE	FALSE	0.364304	55	0	13	42	G	missense_variant	MODERATE	srw-77	WBGene00005824	transcript	W06G6.8	protein_coding
V	16641873	A	[C]	{A, C}	0.285714	0.982456	TRUE	FALSE	FALSE	0.41184	56	0	16	40	C	missense_variant	MODERATE	srw-77	WBGene00005824	transcript	W06G6.8	protein_coding
V	16641923	C	[T]	{C, T}	0.285714	0.982456	TRUE	FALSE	TRUE	0.41184	56	0	16	40	T	missense_variant	MODERATE	srw-77	WBGene00005824	transcript	W06G6.8	protein_coding
V	16641971	G	[C]	{G, C}	0.0185185	0.947368	TRUE	FALSE	FALSE	0.0366909	54	0	1	53	C	missense_variant	MODERATE	srw-77	WBGene00005824	transcript	W06G6.8	protein_coding
V	16641974	A	[C]	{A, C}	0.0185185	0.947368	TRUE	FALSE	FALSE	0.0366909	54	0	1	53	C	missense_variant	MODERATE	srw-77	WBGene00005824	transcript	W06G6.8	protein_coding
V	16642816	T	[A]	{A, T}	0.12963	0.947368	TRUE	FALSE	FALSE	0.22776	54	0	7	47	A	missense_variant	MODERATE	srw-77	WBGene00005824	transcript	W06G6.8	protein_coding
V	16643020	C	[G]	{G, C}	0.290909	0.964912	TRUE	FALSE	FALSE	0.416347	55	0	16	39	G	missense_variant	MODERATE	srw-77	WBGene00005824	transcript	W06G6.8	protein_coding
V	16643144	C	[T]	{C, T}	0.290909	0.964912	TRUE	FALSE	TRUE	0.416347	55	0	16	39	T	missense_variant&splice_region_variant	MODERATE	srw-77	WBGene00005824	transcript	W06G6.8	protein_coding
V	16643217	C	[A]	{A, C}	0.290909	0.964912	TRUE	FALSE	FALSE	0.416347	55	0	16	39	A	missense_variant	MODERATE	srw-77	WBGene00005824	transcript	W06G6.8	protein_coding
V	16643227	A	[C]	{A, C}	0.218182	0.964912	TRUE	FALSE	FALSE	0.344287	55	0	12	43	C	missense_variant	MODERATE	srw-77	WBGene00005824	transcript	W06G6.8	protein_coding
V	16643237	G	[A]	{G, A}	0.218182	0.964912	TRUE	FALSE	TRUE	0.344287	55	0	12	43	A	missense_variant	MODERATE	srw-77	WBGene00005824	transcript	W06G6.8	protein_coding
V	16643238	T	[A]	{A, T}	0.0727273	0.964912	TRUE	FALSE	FALSE	0.136113	55	0	4	51	A	missense_variant	MODERATE	srw-77	WBGene00005824	transcript	W06G6.8	protein_coding
V	16643246	G	[C, A]	{G, A, C}	0.290909	0.964912	TRUE	FALSE	FALSE	0.416347	55	0	16	39	A	missense_variant	MODERATE	srw-77	WBGene00005824	transcript	W06G6.8	protein_coding
V	16643265	C	[T]	{C, T}	0.218182	0.964912	TRUE	FALSE	TRUE	0.344287	55	0	12	43	T	missense_variant	MODERATE	srw-77	WBGene00005824	transcript	W06G6.8	protein_coding
V	16643388	G	[T]	{G, T}	0.309091	0.964912	TRUE	FALSE	FALSE	0.431026	55	0	17	38	T	missense_variant	MODERATE	srw-77	WBGene00005824	transcript	W06G6.8	protein_coding
V	16643405	C	[G]	{G, C}	0.218182	0.964912	TRUE	FALSE	FALSE	0.344287	55	0	12	43	G	missense_variant	MODERATE	srw-77	WBGene00005824	transcript	W06G6.8	protein_coding
V	16643425	A	[T]	{A, T}	0.0545455	0.964912	TRUE	FALSE	FALSE	0.104087	55	0	3	52	T	missense_variant	MODERATE	srw-77	WBGene00005824	transcript	W06G6.8	protein_coding
V	16643451	G	[A]	{G, A}	0.0181818	0.964912	TRUE	FALSE	TRUE	0.03603	55	0	1	54	A	missense_variant	MODERATE	srw-77	WBGene00005824	transcript	W06G6.8	protein_coding
V	16643452	T	[A]	{A, T}	0.309091	0.964912	TRUE	FALSE	FALSE	0.431026	55	0	17	38	A	missense_variant	MODERATE	srw-77	WBGene00005824	transcript	W06G6.8	protein_coding
V	16643477	A	[G]	{G, A}	0.309091	0.964912	TRUE	FALSE	TRUE	0.431026	55	0	17	38	G	missense_variant	MODERATE	srw-77	WBGene00005824	transcript	W06G6.8	protein_coding
V	16643512	A	[T]	{A, T}	0.0545455	0.964912	TRUE	FALSE	FALSE	0.104087	55	0	3	52	T	missense_variant	MODERATE	srw-77	WBGene00005824	transcript	W06G6.8	protein_coding
V	16643568	T	[C, G]	{C, T}	0.0181818	0.964912	TRUE	FALSE	FALSE	0.03603	55	0	1	54	C	missense_variant	MODERATE	srw-77	WBGene00005824	transcript	W06G6.8	protein_coding
V	16643645	G	[C]	{G, C}	0.0181818	0.964912	TRUE	FALSE	FALSE	0.03603	55	0	1	54	C	missense_variant	MODERATE	srw-77	WBGene00005824	transcript	W06G6.8	protein_coding
V	16644828	G	[A]	{G, A}	0.0181818	0.964912	TRUE	FALSE	TRUE	0.03603	55	0	1	54	A	missense_variant	MODERATE	W06G6.17	WBGene00086565	transcript	W06G6.17	protein_coding
V	16644833	T	[C]	{C, T}	0.0545455	0.964912	TRUE	FALSE	TRUE	0.104087	55	0	3	52	C	missense_variant	MODERATE	W06G6.17	WBGene00086565	transcript	W06G6.17	protein_coding
V	16644894	G	[C]	{G, C}	0.218182	0.964912	TRUE	FALSE	FALSE	0.344287	55	0	12	43	C	missense_variant	MODERATE	W06G6.17	WBGene00086565	transcript	W06G6.17	protein_coding
V	16645082	A	[G]	{G, A}	0.222222	0.947368	TRUE	FALSE	TRUE	0.34891	54	0	12	42	G	missense_variant	MODERATE	W06G6.17	WBGene00086565	transcript	W06G6.17	protein_coding
V	16645726	C	[T]	{C, T}	0.214286	0.982456	TRUE	FALSE	TRUE	0.339768	56	0	12	44	T	missense_variant	MODERATE	W06G6.t3	WBGene00014548	transcript	W06G6.t3	protein_coding
V	16645729	G	[A]	{G, A}	0.214286	0.982456	TRUE	FALSE	TRUE	0.339768	56	0	12	44	A	missense_variant	MODERATE	W06G6.t3	WBGene00014548	transcript	W06G6.t3	protein_coding
V	16646041	C	[A]	{A, C}	0.410714	0.982456	TRUE	FALSE	FALSE	0.488417	56	0	23	33	A	missense_variant	MODERATE	W06G6.9	WBGene00012311	transcript	W06G6.9	protein_coding
V	16646198	G	[A]	{G, A}	0.0178571	0.982456	TRUE	FALSE	TRUE	0.0353925	56	0	1	55	A	missense_variant	MODERATE	W06G6.9	WBGene00012311	transcript	W06G6.9	protein_coding
V	16646319	G	[A]	{G, A}	0.0178571	0.982456	TRUE	FALSE	TRUE	0.0353925	56	0	1	55	A	missense_variant&splice_region_variant	MODERATE	W06G6.9	WBGene00012311	transcript	W06G6.9	protein_coding
V	16646338	C	[T]	{C, T}	0.0178571	0.982456	TRUE	FALSE	TRUE	0.0353925	56	0	1	55	T	missense_variant	MODERATE	W06G6.9	WBGene00012311	transcript	W06G6.9	protein_coding
V	16647000	A	[T]	{A, T}	0.210526	1	TRUE	FALSE	FALSE	0.335352	57	0	12	45	T	missense_variant	MODERATE	W06G6.10	WBGene00012312	transcript	W06G6.10	protein_coding
V	16647025	A	[G]	{G, A}	0.210526	1	TRUE	FALSE	TRUE	0.335352	57	0	12	45	G	missense_variant	MODERATE	W06G6.10	WBGene00012312	transcript	W06G6.10	protein_coding
V	16647028	T	[A]	{A, T}	0.210526	1	TRUE	FALSE	FALSE	0.335352	57	0	12	45	A	missense_variant	MODERATE	W06G6.10	WBGene00012312	transcript	W06G6.10	protein_coding
V	16647058	A	[C]	{A, C}	0.315789	1	TRUE	FALSE	FALSE	0.435957	57	0	18	39	C	missense_variant&splice_region_variant	MODERATE	W06G6.10	WBGene00012312	transcript	W06G6.10	protein_coding
V	16647112	C	[A]	{A, C}	0.0175439	1	TRUE	FALSE	FALSE	0.0347772	57	0	1	56	A	missense_variant&splice_region_variant	MODERATE	W06G6.10	WBGene00012312	transcript	W06G6.10	protein_coding
V	16647125	A	[T]	{A, T}	0.219298	1	TRUE	FALSE	FALSE	0.345443	57	1	12	44	T	missense_variant	MODERATE	W06G6.10	WBGene00012312	transcript	W06G6.10	protein_coding
V	16648158	C	[A]	{A, C}	0.122807	1	TRUE	FALSE	FALSE	0.217358	57	0	7	50	A	missense_variant	MODERATE	W06G6.20	WBGene00219308	transcript	W06G6.20.1	protein_coding
V	16648331	G	[A]	{G, A}	0.105263	1	TRUE	FALSE	TRUE	0.190033	57	0	6	51	A	missense_variant	MODERATE	W06G6.20	WBGene00219308	transcript	W06G6.20.1	protein_coding
V	16649279	T	[C]	{C, T}	0.0350877	1	TRUE	FALSE	TRUE	0.0683124	57	0	2	55	C	missense_variant	MODERATE	W06G6.11	WBGene00012313	transcript	W06G6.11	protein_coding
V	16657426	C	[G]	{G, C}	0.0350877	1	TRUE	FALSE	FALSE	0.0683124	57	0	2	55	G	missense_variant	MODERATE	W06G6.15	WBGene00045380	transcript	W06G6.15	protein_coding
V	16666381	C	[T]	{C, T}	0.0526316	1	TRUE	FALSE	TRUE	0.100605	57	0	3	54	T	missense_variant	MODERATE	F14F8.14	WBGene00044185	transcript	F14F8.14	protein_coding
V	16666404	T	[C]	{C, T}	0.0175439	1	TRUE	FALSE	TRUE	0.0347772	57	0	1	56	C	missense_variant	MODERATE	F14F8.14	WBGene00044185	transcript	F14F8.14	protein_coding
V	16666438	C	[A]	{A, C}	0.368421	1	TRUE	FALSE	FALSE	0.469492	57	0	21	36	A	missense_variant	MODERATE	F14F8.14	WBGene00044185	transcript	F14F8.14	protein_coding
V	16666441	C	[G]	{G, C}	0.45614	1	TRUE	FALSE	FALSE	0.500543	57	0	26	31	G	missense_variant	MODERATE	F14F8.14	WBGene00044185	transcript	F14F8.14	protein_coding
V	16666667	C	[G]	{G, C}	0.0526316	1	TRUE	FALSE	FALSE	0.100605	57	0	3	54	G	missense_variant	MODERATE	F14F8.14	WBGene00044185	transcript	F14F8.14	protein_coding
V	16666696	T	[C]	{C, T}	0.245614	1	TRUE	FALSE	TRUE	0.373855	57	0	14	43	C	missense_variant	MODERATE	F14F8.14	WBGene00044185	transcript	F14F8.14	protein_coding
V	16666707	G	[A]	{G, A}	0.0526316	1	TRUE	FALSE	TRUE	0.100605	57	0	3	54	A	missense_variant	MODERATE	F14F8.14	WBGene00044185	transcript	F14F8.14	protein_coding
V	16666722	A	[G]	{G, A}	0.175439	1	TRUE	FALSE	TRUE	0.29188	57	0	10	47	G	missense_variant	MODERATE	F14F8.14	WBGene00044185	transcript	F14F8.14	protein_coding
V	16666723	G	[A]	{G, A}	0.175439	1	TRUE	FALSE	TRUE	0.29188	57	0	10	47	A	missense_variant	MODERATE	F14F8.14	WBGene00044185	transcript	F14F8.14	protein_coding
V	16667791	T	[A]	{A, T}	0.0175439	1	TRUE	FALSE	FALSE	0.0347772	57	0	1	56	A	missense_variant	MODERATE	F14F8.9	WBGene00008817	transcript	F14F8.9	protein_coding
V	16667799	T	[C]	{C, T}	0.45614	1	TRUE	FALSE	TRUE	0.500543	57	0	26	31	C	missense_variant	MODERATE	F14F8.9	WBGene00008817	transcript	F14F8.9	protein_coding
V	16668122	G	[T]	{G, T}	0.0701754	1	TRUE	FALSE	FALSE	0.131657	57	0	4	53	T	missense_variant	MODERATE	F14F8.9	WBGene00008817	transcript	F14F8.9	protein_coding
V	16668169	C	[A]	{A, C}	0.45614	1	TRUE	FALSE	FALSE	0.500543	57	0	26	31	A	missense_variant	MODERATE	F14F8.9	WBGene00008817	transcript	F14F8.9	protein_coding
V	16668234	T	[C]	{C, T}	0.45614	1	TRUE	FALSE	TRUE	0.500543	57	0	26	31	C	missense_variant	MODERATE	F14F8.9	WBGene00008817	transcript	F14F8.9	protein_coding
V	16668255	T	[A]	{A, T}	0.0701754	1	TRUE	FALSE	FALSE	0.131657	57	0	4	53	A	missense_variant	MODERATE	F14F8.9	WBGene00008817	transcript	F14F8.9	protein_coding
V	16668275	T	[C]	{C, T}	0.0701754	1	TRUE	FALSE	TRUE	0.131657	57	0	4	53	C	missense_variant&splice_region_variant	MODERATE	F14F8.9	WBGene00008817	transcript	F14F8.9	protein_coding
V	16668397	A	[T]	{A, T}	0.0892857	0.982456	TRUE	FALSE	FALSE	0.164093	56	0	5	51	T	missense_variant&splice_region_variant	MODERATE	F14F8.9	WBGene00008817	transcript	F14F8.9	protein_coding
V	16668405	T	[C]	{C, T}	0.0701754	1	TRUE	FALSE	TRUE	0.131657	57	0	4	53	C	missense_variant	MODERATE	F14F8.9	WBGene00008817	transcript	F14F8.9	protein_coding
V	16668425	C	[G]	{G, C}	0.0701754	1	TRUE	FALSE	FALSE	0.131657	57	0	4	53	G	missense_variant	MODERATE	F14F8.9	WBGene00008817	transcript	F14F8.9	protein_coding
V	16668526	A	[C]	{A, C}	0.45614	1	TRUE	FALSE	FALSE	0.500543	57	0	26	31	C	missense_variant	MODERATE	F14F8.9	WBGene00008817	transcript	F14F8.9	protein_coding
V	16668563	C	[T]	{C, T}	0.45614	1	TRUE	FALSE	TRUE	0.500543	57	0	26	31	T	missense_variant	MODERATE	F14F8.9	WBGene00008817	transcript	F14F8.9	protein_coding
V	16669382	A	[G]	{G, A}	0.0350877	1	TRUE	FALSE	TRUE	0.0683124	57	0	2	55	G	missense_variant	MODERATE	str-61	WBGene00006125	transcript	F14F8.1	protein_coding
V	16669411	C	[G]	{G, C}	0.45614	1	TRUE	FALSE	FALSE	0.500543	57	0	26	31	G	missense_variant	MODERATE	str-61	WBGene00006125	transcript	F14F8.1	protein_coding
V	16669521	C	[T]	{C, T}	0.0175439	1	TRUE	FALSE	TRUE	0.0347772	57	0	1	56	T	missense_variant	MODERATE	str-61	WBGene00006125	transcript	F14F8.1	protein_coding
V	16669564	A	[G, C]	{G, A}	0.0701754	1	TRUE	FALSE	FALSE	0.131657	57	0	4	53	C	missense_variant	MODERATE	str-61	WBGene00006125	transcript	F14F8.1	protein_coding
V	16669589	C	[T]	{C, T}	0.0175439	1	TRUE	FALSE	TRUE	0.0347772	57	0	1	56	T	missense_variant	MODERATE	str-61	WBGene00006125	transcript	F14F8.1	protein_coding
V	16669602	T	[C]	{C, T}	0.45614	1	TRUE	FALSE	TRUE	0.500543	57	0	26	31	C	missense_variant	MODERATE	str-61	WBGene00006125	transcript	F14F8.1	protein_coding
V	16669719	C	[A]	{A, C}	0.0701754	1	TRUE	FALSE	FALSE	0.131657	57	0	4	53	A	missense_variant	MODERATE	str-61	WBGene00006125	transcript	F14F8.1	protein_coding
V	16669739	G	[A]	{G, A}	0.0701754	1	TRUE	FALSE	TRUE	0.131657	57	0	4	53	A	missense_variant	MODERATE	str-61	WBGene00006125	transcript	F14F8.1	protein_coding
V	16669749	T	[C]	{C, T}	0.0526316	1	TRUE	FALSE	TRUE	0.100605	57	0	3	54	C	missense_variant	MODERATE	str-61	WBGene00006125	transcript	F14F8.1	protein_coding
V	16669766	C	[A]	{A, C}	0.45614	1	TRUE	FALSE	FALSE	0.500543	57	0	26	31	A	missense_variant	MODERATE	str-61	WBGene00006125	transcript	F14F8.1	protein_coding
V	16669878	C	[T]	{C, T}	0.0350877	1	TRUE	FALSE	TRUE	0.0683124	57	0	2	55	T	missense_variant	MODERATE	str-61	WBGene00006125	transcript	F14F8.1	protein_coding
V	16669890	G	[T, A]	{G, T}	0.0175439	1	TRUE	FALSE	FALSE	0.0347772	57	0	1	56	T	missense_variant	MODERATE	str-61	WBGene00006125	transcript	F14F8.1	protein_coding
V	16669923	A	[T]	{A, T}	0.0526316	1	TRUE	FALSE	FALSE	0.100605	57	0	3	54	T	missense_variant	MODERATE	str-61	WBGene00006125	transcript	F14F8.1	protein_coding
V	16670805	C	[T]	{C, T}	0.157895	1	TRUE	FALSE	TRUE	0.268281	57	0	9	48	T	missense_variant&splice_region_variant	MODERATE	str-61	WBGene00006125	transcript	F14F8.1	protein_coding
V	16670806	A	[G]	{G, A}	0.245614	1	TRUE	FALSE	TRUE	0.373855	57	0	14	43	G	missense_variant	MODERATE	str-61	WBGene00006125	transcript	F14F8.1	protein_coding
V	16670850	C	[T, G]	{C, T}	0.157895	1	TRUE	FALSE	FALSE	0.268281	57	0	9	48	G	missense_variant	MODERATE	str-61	WBGene00006125	transcript	F14F8.1	protein_coding
V	16670855	A	[T]	{A, T}	0.157895	1	TRUE	FALSE	FALSE	0.268281	57	0	9	48	T	missense_variant	MODERATE	str-61	WBGene00006125	transcript	F14F8.1	protein_coding
V	16670888	T	[A]	{A, T}	0.157895	1	TRUE	FALSE	FALSE	0.268281	57	0	9	48	A	missense_variant	MODERATE	str-61	WBGene00006125	transcript	F14F8.1	protein_coding
V	16670897	C	[G, A]	{G, C}	0.157895	1	TRUE	FALSE	FALSE	0.268281	57	0	9	48	A	missense_variant	MODERATE	str-61	WBGene00006125	transcript	F14F8.1	protein_coding
V	16670950	A	[C]	{A, C}	0.157895	1	TRUE	FALSE	FALSE	0.268281	57	0	9	48	C	missense_variant	MODERATE	str-61	WBGene00006125	transcript	F14F8.1	protein_coding
V	16671053	A	[C]	{A, C}	0.0877193	1	TRUE	FALSE	FALSE	0.161466	57	0	5	52	C	missense_variant	MODERATE	str-61	WBGene00006125	transcript	F14F8.1	protein_coding
V	16671212	C	[T]	{C, T}	0.0181818	0.964912	TRUE	FALSE	TRUE	0.03603	55	0	1	54	T	missense_variant	MODERATE	str-61	WBGene00006125	transcript	F14F8.1	protein_coding
V	16671268	C	[G]	{G, C}	0.109091	0.964912	TRUE	FALSE	FALSE	0.196163	55	0	6	49	G	missense_variant	MODERATE	str-61	WBGene00006125	transcript	F14F8.1	protein_coding
V	16671283	G	[A]	{G, A}	0.0545455	0.964912	TRUE	FALSE	TRUE	0.104087	55	0	3	52	A	missense_variant	MODERATE	str-61	WBGene00006125	transcript	F14F8.1	protein_coding
V	16671287	A	[G]	{G, A}	0.436364	0.964912	TRUE	FALSE	TRUE	0.496414	55	0	24	31	G	missense_variant	MODERATE	str-61	WBGene00006125	transcript	F14F8.1	protein_coding
V	16671652	G	[C, T]	{G, C}	0.309091	0.964912	TRUE	FALSE	FALSE	0.431026	55	0	17	38	C	missense_variant	MODERATE	F14F8.8	WBGene00008816	transcript	F14F8.8	protein_coding
V	16671666	C	[T]	{C, T}	0.127273	0.964912	TRUE	FALSE	TRUE	0.224187	55	0	7	48	T	missense_variant	MODERATE	F14F8.8	WBGene00008816	transcript	F14F8.8	protein_coding
V	16671697	A	[G]	{G, A}	0.0181818	0.964912	TRUE	FALSE	TRUE	0.03603	55	0	1	54	G	missense_variant	MODERATE	F14F8.8	WBGene00008816	transcript	F14F8.8	protein_coding
V	16671785	C	[T]	{C, T}	0.0526316	1	TRUE	FALSE	TRUE	0.100605	57	0	3	54	T	missense_variant	MODERATE	F14F8.8	WBGene00008816	transcript	F14F8.8	protein_coding
V	16671807	CCAGCGA	[C]	{CCAGCGA, C}	0.122807	1	FALSE	TRUE	FALSE	0.217358	57	0	7	50	C	disruptive_inframe_deletion	MODERATE	F14F8.8	WBGene00008816	transcript	F14F8.8	protein_coding
V	16675860	A	[G]	{G, A}	0.0350877	1	TRUE	FALSE	TRUE	0.0683124	57	0	2	55	G	missense_variant	MODERATE	srz-1	WBGene00008814	transcript	F14F8.3	protein_coding
V	16675863	C	[T]	{C, T}	0.192982	1	TRUE	FALSE	TRUE	0.314237	57	0	11	46	T	missense_variant	MODERATE	srz-1	WBGene00008814	transcript	F14F8.3	protein_coding
V	16676124	G	[T]	{G, T}	0.315789	1	TRUE	FALSE	FALSE	0.435957	57	0	18	39	T	missense_variant	MODERATE	srz-1	WBGene00008814	transcript	F14F8.3	protein_coding
V	16676408	G	[T]	{G, T}	0.0526316	1	TRUE	FALSE	FALSE	0.100605	57	0	3	54	T	missense_variant	MODERATE	srz-1	WBGene00008814	transcript	F14F8.3	protein_coding
V	16676455	A	[C]	{A, C}	0.263158	1	TRUE	FALSE	FALSE	0.391244	57	0	15	42	C	missense_variant	MODERATE	srz-1	WBGene00008814	transcript	F14F8.3	protein_coding
V	16676522	C	[A]	{A, C}	0.45614	1	TRUE	FALSE	FALSE	0.500543	57	0	26	31	A	missense_variant	MODERATE	srz-1	WBGene00008814	transcript	F14F8.3	protein_coding
V	16676581	A	[G]	{G, A}	0.45614	1	TRUE	FALSE	TRUE	0.500543	57	0	26	31	G	missense_variant	MODERATE	srz-1	WBGene00008814	transcript	F14F8.3	protein_coding
V	16676693	C	[T]	{C, T}	0.45614	1	TRUE	FALSE	TRUE	0.500543	57	0	26	31	T	missense_variant	MODERATE	srz-1	WBGene00008814	transcript	F14F8.3	protein_coding
V	16677652	T	[C]	{C, T}	0.0526316	1	TRUE	FALSE	TRUE	0.100605	57	0	3	54	C	missense_variant	MODERATE	srz-103	WBGene00008815	transcript	F14F8.4	protein_coding
V	16677660	C	[T]	{C, T}	0.45614	1	TRUE	FALSE	TRUE	0.500543	57	0	26	31	T	missense_variant	MODERATE	srz-103	WBGene00008815	transcript	F14F8.4	protein_coding
V	16677681	C	[T, G]	{C, T}	0.0350877	1	TRUE	FALSE	FALSE	0.0683124	57	0	2	55	G	missense_variant	MODERATE	srz-103	WBGene00008815	transcript	F14F8.4	protein_coding
V	16677718	A	[G]	{G, A}	0.192982	1	TRUE	FALSE	TRUE	0.314237	57	0	11	46	G	missense_variant	MODERATE	srz-103	WBGene00008815	transcript	F14F8.4	protein_coding
V	16677735	A	[C]	{A, C}	0.0526316	1	TRUE	FALSE	FALSE	0.100605	57	0	3	54	C	missense_variant	MODERATE	srz-103	WBGene00008815	transcript	F14F8.4	protein_coding
V	16677829	G	[A]	{G, A}	0.0175439	1	TRUE	FALSE	TRUE	0.0347772	57	0	1	56	A	missense_variant	MODERATE	srz-103	WBGene00008815	transcript	F14F8.4	protein_coding
V	16677849	G	[A]	{G, A}	0.45614	1	TRUE	FALSE	TRUE	0.500543	57	0	26	31	A	missense_variant	MODERATE	srz-103	WBGene00008815	transcript	F14F8.4	protein_coding
V	16678643	G	[A]	{G, A}	0.0350877	1	TRUE	FALSE	TRUE	0.0683124	57	0	2	55	A	missense_variant	MODERATE	srz-103	WBGene00008815	transcript	F14F8.4	protein_coding
V	16678742	G	[C]	{G, C}	0.0877193	1	TRUE	FALSE	FALSE	0.161466	57	0	5	52	C	missense_variant	MODERATE	srz-103	WBGene00008815	transcript	F14F8.4	protein_coding
V	16679201	C	[T]	{C, T}	0.45614	1	TRUE	FALSE	TRUE	0.500543	57	0	26	31	T	missense_variant	MODERATE	srz-103	WBGene00008815	transcript	F14F8.4	protein_coding
V	16679249	T	[C]	{C, T}	0.0526316	1	TRUE	FALSE	TRUE	0.100605	57	0	3	54	C	missense_variant	MODERATE	srz-103	WBGene00008815	transcript	F14F8.4	protein_coding
V	16680774	A	[G]	{G, A}	0.0535714	0.982456	TRUE	FALSE	TRUE	0.102317	56	0	3	53	G	missense_variant	MODERATE	srw-44	WBGene00005791	transcript	F14F8.6	protein_coding
V	16680801	G	[A]	{G, A}	0.0178571	0.982456	TRUE	FALSE	TRUE	0.0353925	56	0	1	55	A	missense_variant	MODERATE	srw-44	WBGene00005791	transcript	F14F8.6	protein_coding
V	16680876	A	[G]	{G, A}	0.0535714	0.982456	TRUE	FALSE	TRUE	0.102317	56	0	3	53	G	missense_variant	MODERATE	srw-44	WBGene00005791	transcript	F14F8.6	protein_coding
V	16681768	A	[G]	{G, A}	0.0178571	0.982456	TRUE	FALSE	TRUE	0.0353925	56	0	1	55	G	missense_variant	MODERATE	srw-44	WBGene00005791	transcript	F14F8.6	protein_coding
V	16682264	C	[T]	{C, T}	0.142857	0.982456	TRUE	FALSE	TRUE	0.247104	56	0	8	48	T	missense_variant	MODERATE	srw-44	WBGene00005791	transcript	F14F8.6	protein_coding
V	16682565	G	[A]	{G, A}	0.0892857	0.982456	TRUE	FALSE	TRUE	0.164093	56	0	5	51	A	missense_variant	MODERATE	srw-44	WBGene00005791	transcript	F14F8.6	protein_coding
V	16683220	C	[A]	{A, C}	0.0555556	0.947368	TRUE	FALSE	FALSE	0.105919	54	0	3	51	A	missense_variant	MODERATE	srw-36	WBGene00005783	transcript	F14F8.7	protein_coding
V	16683241	G	[A]	{G, A}	0.0185185	0.947368	TRUE	FALSE	TRUE	0.0366909	54	0	1	53	A	missense_variant	MODERATE	srw-36	WBGene00005783	transcript	F14F8.7	protein_coding
V	16683280	T	[C]	{C, T}	0.0925926	0.947368	TRUE	FALSE	TRUE	0.169609	54	0	5	49	C	missense_variant	MODERATE	srw-36	WBGene00005783	transcript	F14F8.7	protein_coding
V	16683345	C	[A]	{A, C}	0.0892857	0.982456	TRUE	FALSE	FALSE	0.164093	56	0	5	51	A	missense_variant	MODERATE	srw-36	WBGene00005783	transcript	F14F8.7	protein_coding
V	16683806	A	[T]	{A, T}	0.0545455	0.964912	TRUE	FALSE	FALSE	0.104087	55	0	3	52	T	missense_variant	MODERATE	srw-36	WBGene00005783	transcript	F14F8.7	protein_coding
V	16683896	G	[A]	{G, A}	0.0892857	0.982456	TRUE	FALSE	TRUE	0.164093	56	0	5	51	A	missense_variant	MODERATE	srw-36	WBGene00005783	transcript	F14F8.7	protein_coding
V	16684077	C	[A]	{A, C}	0.0178571	0.982456	TRUE	FALSE	FALSE	0.0353925	56	0	1	55	A	missense_variant	MODERATE	srw-36	WBGene00005783	transcript	F14F8.7	protein_coding
V	16686038	T	[C]	{C, T}	0.0350877	1	TRUE	FALSE	TRUE	0.0683124	57	0	2	55	C	missense_variant	MODERATE	srw-43	WBGene00005790	transcript	F14F8.5	protein_coding
V	16686471	A	[T]	{A, T}	0.0350877	1	TRUE	FALSE	FALSE	0.0683124	57	0	2	55	T	missense_variant	MODERATE	srw-43	WBGene00005790	transcript	F14F8.5	protein_coding
V	16686486	C	[A]	{A, C}	0.0175439	1	TRUE	FALSE	FALSE	0.0347772	57	0	1	56	A	missense_variant	MODERATE	srw-43	WBGene00005790	transcript	F14F8.5	protein_coding
V	16686497	G	[A]	{G, A}	0.192982	1	TRUE	FALSE	TRUE	0.314237	57	0	11	46	A	missense_variant	MODERATE	srw-43	WBGene00005790	transcript	F14F8.5	protein_coding
V	16686597	AAGG	[A]	{A, AAGG}	0.0350877	1	FALSE	TRUE	FALSE	0.0683124	57	0	2	55	A	conservative_inframe_deletion	MODERATE	srw-43	WBGene00005790	transcript	F14F8.5	protein_coding
V	16686621	C	[T]	{C, T}	0.0350877	1	TRUE	FALSE	TRUE	0.0683124	57	0	2	55	T	missense_variant	MODERATE	srw-43	WBGene00005790	transcript	F14F8.5	protein_coding
V	16686691	GACA	[G]	{G, GACA}	0.0526316	1	FALSE	TRUE	FALSE	0.100605	57	0	3	54	G	conservative_inframe_deletion	MODERATE	srw-43	WBGene00005790	transcript	F14F8.5	protein_coding
V	16686784	CATG	[C]	{CATG, C}	0.0526316	1	FALSE	TRUE	FALSE	0.100605	57	0	3	54	C	disruptive_inframe_deletion	MODERATE	srw-43	WBGene00005790	transcript	F14F8.5	protein_coding
V	16686785	A	[G]	{G, A}	0.0181818	0.964912	TRUE	FALSE	TRUE	0.03603	55	0	1	54	G	missense_variant	MODERATE	srw-43	WBGene00005790	transcript	F14F8.5	protein_coding
V	16686930	G	[C]	{G, C}	0.45614	1	TRUE	FALSE	FALSE	0.500543	57	0	26	31	C	missense_variant	MODERATE	srw-43	WBGene00005790	transcript	F14F8.5	protein_coding
V	16687547	C	[A]	{A, C}	0.350877	1	TRUE	FALSE	FALSE	0.459556	57	0	20	37	A	missense_variant	MODERATE	srz-102	WBGene00023505	transcript	F14F8.13	protein_coding
V	16687560	G	[A]	{G, A}	0.350877	1	TRUE	FALSE	TRUE	0.459556	57	0	20	37	A	missense_variant	MODERATE	srz-102	WBGene00023505	transcript	F14F8.13	protein_coding
V	16687578	T	[A]	{A, T}	0.0175439	1	TRUE	FALSE	FALSE	0.0347772	57	0	1	56	A	missense_variant	MODERATE	srz-102	WBGene00023505	transcript	F14F8.13	protein_coding
V	16687586	A	[T]	{A, T}	0.315789	1	TRUE	FALSE	FALSE	0.435957	57	0	18	39	T	missense_variant	MODERATE	srz-102	WBGene00023505	transcript	F14F8.13	protein_coding
V	16687587	A	[G]	{G, A}	0.315789	1	TRUE	FALSE	TRUE	0.435957	57	0	18	39	G	missense_variant	MODERATE	srz-102	WBGene00023505	transcript	F14F8.13	protein_coding
V	16687786	T	[C, A]	{A, C, T}	0.0566038	0.929825	TRUE	FALSE	FALSE	0.107817	53	0	3	50	A	missense_variant	MODERATE	srz-102	WBGene00023505	transcript	F14F8.13	protein_coding
V	16687848	G	[A]	{G, A}	0.0175439	1	TRUE	FALSE	TRUE	0.0347772	57	0	1	56	A	missense_variant	MODERATE	srz-102	WBGene00023505	transcript	F14F8.13	protein_coding
V	16688978	T	[G]	{G, T}	0.45614	1	TRUE	FALSE	FALSE	0.500543	57	0	26	31	G	missense_variant	MODERATE	srz-102	WBGene00023505	transcript	F14F8.13	protein_coding
V	16689452	C	[T]	{C, T}	0.0175439	1	TRUE	FALSE	TRUE	0.0347772	57	0	1	56	T	missense_variant	MODERATE	srz-102	WBGene00023505	transcript	F14F8.13	protein_coding
V	16689457	A	[G]	{G, A}	0.140351	1	TRUE	FALSE	TRUE	0.24344	57	0	8	49	G	missense_variant	MODERATE	srz-102	WBGene00023505	transcript	F14F8.13	protein_coding
V	16689494	A	[G]	{G, A}	0.403509	1	TRUE	FALSE	TRUE	0.485639	57	0	23	34	G	missense_variant	MODERATE	srz-102	WBGene00023505	transcript	F14F8.13	protein_coding
V	16689717	A	[G]	{G, A}	0.0526316	1	TRUE	FALSE	TRUE	0.100605	57	0	3	54	G	missense_variant	MODERATE	srz-102	WBGene00023505	transcript	F14F8.13	protein_coding
V	16692385	A	[G]	{G, A}	0.0526316	1	TRUE	FALSE	TRUE	0.100605	57	0	3	54	G	missense_variant	MODERATE	srw-42	WBGene00005789	transcript	F14F8.11	protein_coding
V	16692625	G	[A]	{G, A}	0.175439	1	TRUE	FALSE	TRUE	0.29188	57	0	10	47	A	missense_variant	MODERATE	srw-42	WBGene00005789	transcript	F14F8.11	protein_coding
V	16692754	G	[A]	{G, A}	0.0350877	1	TRUE	FALSE	TRUE	0.0683124	57	0	2	55	A	missense_variant	MODERATE	srw-42	WBGene00005789	transcript	F14F8.11	protein_coding
V	16692755	T	[A]	{A, T}	0.0350877	1	TRUE	FALSE	FALSE	0.0683124	57	0	2	55	A	missense_variant	MODERATE	srw-42	WBGene00005789	transcript	F14F8.11	protein_coding
V	16692815	T	[C]	{C, T}	0.0175439	1	TRUE	FALSE	TRUE	0.0347772	57	0	1	56	C	missense_variant	MODERATE	srw-42	WBGene00005789	transcript	F14F8.11	protein_coding
V	16692833	A	[T]	{A, T}	0.0175439	1	TRUE	FALSE	FALSE	0.0347772	57	0	1	56	T	missense_variant	MODERATE	srw-42	WBGene00005789	transcript	F14F8.11	protein_coding
V	16692851	T	[G]	{G, T}	0.0175439	1	TRUE	FALSE	FALSE	0.0347772	57	0	1	56	G	missense_variant&splice_region_variant	MODERATE	srw-42	WBGene00005789	transcript	F14F8.11	protein_coding
V	16693661	C	[G]	{G, C}	0.0175439	1	TRUE	FALSE	FALSE	0.0347772	57	0	1	56	G	missense_variant	MODERATE	srw-42	WBGene00005789	transcript	F14F8.11	protein_coding
V	16694844	G	[A]	{G, A}	0.0701754	1	TRUE	FALSE	TRUE	0.131657	57	0	4	53	A	missense_variant	MODERATE	srz-101	WBGene00008818	transcript	F14F8.12	protein_coding
V	16694858	C	[A]	{A, C}	0.0175439	1	TRUE	FALSE	FALSE	0.0347772	57	0	1	56	A	missense_variant	MODERATE	srz-101	WBGene00008818	transcript	F14F8.12	protein_coding
V	16694871	G	[A]	{G, A}	0.0175439	1	TRUE	FALSE	TRUE	0.0347772	57	0	1	56	A	missense_variant	MODERATE	srz-101	WBGene00008818	transcript	F14F8.12	protein_coding
V	16694889	T	[A]	{A, T}	0.140351	1	TRUE	FALSE	FALSE	0.24344	57	0	8	49	A	missense_variant	MODERATE	srz-101	WBGene00008818	transcript	F14F8.12	protein_coding
V	16694897	A	[T]	{A, T}	0.0175439	1	TRUE	FALSE	FALSE	0.0347772	57	0	1	56	T	missense_variant	MODERATE	srz-101	WBGene00008818	transcript	F14F8.12	protein_coding
V	16694898	A	[G]	{G, A}	0.0175439	1	TRUE	FALSE	TRUE	0.0347772	57	0	1	56	G	missense_variant	MODERATE	srz-101	WBGene00008818	transcript	F14F8.12	protein_coding
V	16694907	T	[C]	{C, T}	0.0175439	1	TRUE	FALSE	TRUE	0.0347772	57	0	1	56	C	missense_variant	MODERATE	srz-101	WBGene00008818	transcript	F14F8.12	protein_coding
V	16695066	T	[C]	{C, T}	0.0526316	1	TRUE	FALSE	TRUE	0.100605	57	0	3	54	C	missense_variant	MODERATE	srz-101	WBGene00008818	transcript	F14F8.12	protein_coding
V	16695143	A	[T]	{A, T}	0.0526316	1	TRUE	FALSE	FALSE	0.100605	57	0	3	54	T	missense_variant	MODERATE	srz-101	WBGene00008818	transcript	F14F8.12	protein_coding
V	16695157	C	[G]	{G, C}	0.0526316	1	TRUE	FALSE	FALSE	0.100605	57	0	3	54	G	missense_variant	MODERATE	srz-101	WBGene00008818	transcript	F14F8.12	protein_coding
V	16695169	T	[A]	{A, T}	0.0526316	1	TRUE	FALSE	FALSE	0.100605	57	0	3	54	A	missense_variant	MODERATE	srz-101	WBGene00008818	transcript	F14F8.12	protein_coding
V	16695173	A	[T]	{A, T}	0.0526316	1	TRUE	FALSE	FALSE	0.100605	57	0	3	54	T	missense_variant	MODERATE	srz-101	WBGene00008818	transcript	F14F8.12	protein_coding
V	16695176	T	[A, G]	{G, A, T}	0.0526316	1	TRUE	FALSE	FALSE	0.100605	57	0	3	54	A	missense_variant	MODERATE	srz-101	WBGene00008818	transcript	F14F8.12	protein_coding
V	16695177	C	[A]	{A, C}	0.0789474	1	TRUE	FALSE	FALSE	0.146716	57	5	2	50	A	missense_variant	MODERATE	srz-101	WBGene00008818	transcript	F14F8.12	protein_coding
V	16695179	G	[A]	{G, A}	0.0526316	1	TRUE	FALSE	TRUE	0.100605	57	0	3	54	A	missense_variant	MODERATE	srz-101	WBGene00008818	transcript	F14F8.12	protein_coding
V	16695180	A	[G]	{G, A}	0.0526316	1	TRUE	FALSE	TRUE	0.100605	57	0	3	54	G	missense_variant	MODERATE	srz-101	WBGene00008818	transcript	F14F8.12	protein_coding
V	16695196	A	[T]	{A, T}	0.0526316	1	TRUE	FALSE	FALSE	0.100605	57	0	3	54	T	missense_variant	MODERATE	srz-101	WBGene00008818	transcript	F14F8.12	protein_coding
V	16695523	T	[G]	{G, T}	0.140351	1	TRUE	FALSE	FALSE	0.24344	57	0	8	49	G	missense_variant	MODERATE	srz-101	WBGene00008818	transcript	F14F8.12	protein_coding
V	16695654	T	[G]	{G, T}	0.0175439	1	TRUE	FALSE	FALSE	0.0347772	57	0	1	56	G	missense_variant	MODERATE	srz-101	WBGene00008818	transcript	F14F8.12	protein_coding
V	16695676	C	[A]	{A, C}	0.0526316	1	TRUE	FALSE	FALSE	0.100605	57	0	3	54	A	missense_variant	MODERATE	srz-101	WBGene00008818	transcript	F14F8.12	protein_coding
V	16695723	G	[A]	{G, A}	0.0526316	1	TRUE	FALSE	TRUE	0.100605	57	0	3	54	A	missense_variant	MODERATE	srz-101	WBGene00008818	transcript	F14F8.12	protein_coding
V	16696179	A	[G]	{G, A}	0.140351	1	TRUE	FALSE	TRUE	0.24344	57	0	8	49	G	missense_variant	MODERATE	srz-101	WBGene00008818	transcript	F14F8.12	protein_coding
V	16696196	G	[A]	{G, A}	0.0877193	1	TRUE	FALSE	TRUE	0.161466	57	0	5	52	A	missense_variant	MODERATE	srz-101	WBGene00008818	transcript	F14F8.12	protein_coding
V	16696216	A	[G]	{G, A}	0.140351	1	TRUE	FALSE	TRUE	0.24344	57	0	8	49	G	missense_variant	MODERATE	srz-101	WBGene00008818	transcript	F14F8.12	protein_coding
V	16696395	G	[A]	{G, A}	0.140351	1	TRUE	FALSE	TRUE	0.24344	57	0	8	49	A	missense_variant	MODERATE	srz-101	WBGene00008818	transcript	F14F8.12	protein_coding
V	16696417	A	[G]	{G, A}	0.140351	1	TRUE	FALSE	TRUE	0.24344	57	0	8	49	G	missense_variant	MODERATE	srz-101	WBGene00008818	transcript	F14F8.12	protein_coding
V	16696441	T	[A]	{A, T}	0.0526316	1	TRUE	FALSE	FALSE	0.100605	57	0	3	54	A	missense_variant	MODERATE	srz-101	WBGene00008818	transcript	F14F8.12	protein_coding
V	16696449	C	[A]	{A, C}	0.140351	1	TRUE	FALSE	FALSE	0.24344	57	0	8	49	A	missense_variant	MODERATE	srz-101	WBGene00008818	transcript	F14F8.12	protein_coding
V	16696498	C	[A]	{A, C}	0.0175439	1	TRUE	FALSE	FALSE	0.0347772	57	0	1	56	A	missense_variant	MODERATE	srz-101	WBGene00008818	transcript	F14F8.12	protein_coding
V	16696530	T	[C, A]	{C, T}	0.0526316	1	TRUE	FALSE	FALSE	0.100605	57	0	3	54	A	missense_variant	MODERATE	srz-101	WBGene00008818	transcript	F14F8.12	protein_coding
V	16696556	C	[A]	{A, C}	0.140351	1	TRUE	FALSE	FALSE	0.24344	57	0	8	49	A	missense_variant	MODERATE	srz-101	WBGene00008818	transcript	F14F8.12	protein_coding
V	16697523	G	[A]	{G, A}	0.140351	1	TRUE	FALSE	TRUE	0.24344	57	0	8	49	A	missense_variant	MODERATE	srw-41	WBGene00005788	transcript	F14F8.10	protein_coding
V	16697551	A	[C]	{A, C}	0.0877193	1	TRUE	FALSE	FALSE	0.161466	57	0	5	52	C	missense_variant	MODERATE	srw-41	WBGene00005788	transcript	F14F8.10	protein_coding
V	16697560	G	[A]	{G, A}	0.140351	1	TRUE	FALSE	TRUE	0.24344	57	0	8	49	A	missense_variant	MODERATE	srw-41	WBGene00005788	transcript	F14F8.10	protein_coding
V	16697571	A	[G]	{G, A}	0.0350877	1	TRUE	FALSE	TRUE	0.0683124	57	0	2	55	G	missense_variant	MODERATE	srw-41	WBGene00005788	transcript	F14F8.10	protein_coding
V	16697575	T	[C]	{C, T}	0.0526316	1	TRUE	FALSE	TRUE	0.100605	57	0	3	54	C	missense_variant	MODERATE	srw-41	WBGene00005788	transcript	F14F8.10	protein_coding
V	16697580	A	[T]	{A, T}	0.0175439	1	TRUE	FALSE	FALSE	0.0347772	57	0	1	56	T	missense_variant	MODERATE	srw-41	WBGene00005788	transcript	F14F8.10	protein_coding
V	16697584	C	[A]	{A, C}	0.0175439	1	TRUE	FALSE	FALSE	0.0347772	57	0	1	56	A	missense_variant	MODERATE	srw-41	WBGene00005788	transcript	F14F8.10	protein_coding
V	16697660	G	[A]	{G, A}	0.140351	1	TRUE	FALSE	TRUE	0.24344	57	0	8	49	A	missense_variant	MODERATE	srw-41	WBGene00005788	transcript	F14F8.10	protein_coding
V	16697663	G	[A]	{G, A}	0.140351	1	TRUE	FALSE	TRUE	0.24344	57	0	8	49	A	missense_variant	MODERATE	srw-41	WBGene00005788	transcript	F14F8.10	protein_coding
V	16697679	T	[C]	{C, T}	0.140351	1	TRUE	FALSE	TRUE	0.24344	57	0	8	49	C	missense_variant	MODERATE	srw-41	WBGene00005788	transcript	F14F8.10	protein_coding
V	16697687	G	[A]	{G, A}	0.140351	1	TRUE	FALSE	TRUE	0.24344	57	0	8	49	A	missense_variant	MODERATE	srw-41	WBGene00005788	transcript	F14F8.10	protein_coding
V	16697705	A	[G]	{G, A}	0.140351	1	TRUE	FALSE	TRUE	0.24344	57	0	8	49	G	missense_variant	MODERATE	srw-41	WBGene00005788	transcript	F14F8.10	protein_coding
V	16697706	C	[T]	{C, T}	0.140351	1	TRUE	FALSE	TRUE	0.24344	57	0	8	49	T	missense_variant	MODERATE	srw-41	WBGene00005788	transcript	F14F8.10	protein_coding
V	16697720	A	[G]	{G, A}	0.140351	1	TRUE	FALSE	TRUE	0.24344	57	0	8	49	G	missense_variant	MODERATE	srw-41	WBGene00005788	transcript	F14F8.10	protein_coding
V	16697799	C	[T]	{C, T}	0.140351	1	TRUE	FALSE	TRUE	0.24344	57	0	8	49	T	missense_variant	MODERATE	srw-41	WBGene00005788	transcript	F14F8.10	protein_coding
V	16697811	T	[C]	{C, T}	0.140351	1	TRUE	FALSE	TRUE	0.24344	57	0	8	49	C	missense_variant	MODERATE	srw-41	WBGene00005788	transcript	F14F8.10	protein_coding
V	16697815	T	[A]	{A, T}	0.140351	1	TRUE	FALSE	FALSE	0.24344	57	0	8	49	A	missense_variant	MODERATE	srw-41	WBGene00005788	transcript	F14F8.10	protein_coding
V	16697817	A	[C]	{A, C}	0.140351	1	TRUE	FALSE	FALSE	0.24344	57	0	8	49	C	missense_variant	MODERATE	srw-41	WBGene00005788	transcript	F14F8.10	protein_coding
V	16697818	T	[A]	{A, T}	0.140351	1	TRUE	FALSE	FALSE	0.24344	57	0	8	49	A	missense_variant	MODERATE	srw-41	WBGene00005788	transcript	F14F8.10	protein_coding
V	16697822	T	[A]	{A, T}	0.140351	1	TRUE	FALSE	FALSE	0.24344	57	0	8	49	A	missense_variant	MODERATE	srw-41	WBGene00005788	transcript	F14F8.10	protein_coding
V	16697830	G	[C]	{G, C}	0.140351	1	TRUE	FALSE	FALSE	0.24344	57	0	8	49	C	missense_variant	MODERATE	srw-41	WBGene00005788	transcript	F14F8.10	protein_coding
V	16697837	G	[T]	{G, T}	0.140351	1	TRUE	FALSE	FALSE	0.24344	57	0	8	49	T	missense_variant	MODERATE	srw-41	WBGene00005788	transcript	F14F8.10	protein_coding
V	16698747	G	[A]	{G, A}	0.0175439	1	TRUE	FALSE	TRUE	0.0347772	57	0	1	56	A	missense_variant	MODERATE	srw-41	WBGene00005788	transcript	F14F8.10	protein_coding
V	16698837	T	[C]	{C, T}	0.0877193	1	TRUE	FALSE	TRUE	0.161466	57	0	5	52	C	missense_variant	MODERATE	srw-41	WBGene00005788	transcript	F14F8.10	protein_coding
V	16700348	G	[T]	{G, T}	0.245614	1	TRUE	FALSE	FALSE	0.373855	57	0	14	43	T	missense_variant	MODERATE	Y70C5C.1	WBGene00013492	transcript	Y70C5C.1	protein_coding
V	16700361	G	[T]	{G, T}	0.0350877	1	TRUE	FALSE	FALSE	0.0683124	57	0	2	55	T	missense_variant	MODERATE	Y70C5C.1	WBGene00013492	transcript	Y70C5C.1	protein_coding
V	16700368	G	[T]	{G, T}	0.438596	1	TRUE	FALSE	FALSE	0.496817	57	0	25	32	T	missense_variant	MODERATE	Y70C5C.1	WBGene00013492	transcript	Y70C5C.1	protein_coding
V	16700397	G	[A]	{G, A}	0.0175439	1	TRUE	FALSE	TRUE	0.0347772	57	0	1	56	A	missense_variant	MODERATE	Y70C5C.1	WBGene00013492	transcript	Y70C5C.1	protein_coding
V	16700700	G	[A]	{G, A}	0.0175439	1	TRUE	FALSE	TRUE	0.0347772	57	0	1	56	A	missense_variant	MODERATE	Y70C5C.1	WBGene00013492	transcript	Y70C5C.1	protein_coding
V	16700863	A	[T]	{A, T}	0.0350877	1	TRUE	FALSE	FALSE	0.0683124	57	0	2	55	T	missense_variant	MODERATE	Y70C5C.1	WBGene00013492	transcript	Y70C5C.1	protein_coding
V	16701192	C	[A]	{A, C}	0.0350877	1	TRUE	FALSE	FALSE	0.0683124	57	0	2	55	A	missense_variant	MODERATE	Y70C5C.1	WBGene00013492	transcript	Y70C5C.1	protein_coding
V	16701213	T	[C]	{C, T}	0.45614	1	TRUE	FALSE	TRUE	0.500543	57	0	26	31	C	missense_variant	MODERATE	Y70C5C.1	WBGene00013492	transcript	Y70C5C.1	protein_coding
V	16701636	G	[A]	{G, A}	0.0175439	1	TRUE	FALSE	TRUE	0.0347772	57	0	1	56	A	missense_variant	MODERATE	Y70C5C.1	WBGene00013492	transcript	Y70C5C.1	protein_coding
V	16701658	C	[CTAACTA]	{C, CTAACTA}	0.210526	1	FALSE	TRUE	FALSE	0.335352	57	0	12	45	CTAACTA	disruptive_inframe_insertion	MODERATE	Y70C5C.1	WBGene00013492	transcript	Y70C5C.1	protein_coding
V	16701799	C	[T]	{C, T}	0.210526	1	TRUE	FALSE	TRUE	0.335352	57	0	12	45	T	missense_variant	MODERATE	Y70C5C.1	WBGene00013492	transcript	Y70C5C.1	protein_coding
V	16702131	T	[A]	{A, T}	0.140351	1	TRUE	FALSE	FALSE	0.24344	57	0	8	49	A	missense_variant	MODERATE	Y70C5C.1	WBGene00013492	transcript	Y70C5C.1	protein_coding
V	16703129	C	[A]	{A, C}	0.368421	1	TRUE	FALSE	FALSE	0.469492	57	0	21	36	A	missense_variant	MODERATE	Y70C5C.1	WBGene00013492	transcript	Y70C5C.1	protein_coding
V	16703360	T	[C]	{C, T}	0.0526316	1	TRUE	FALSE	TRUE	0.100605	57	0	3	54	C	missense_variant	MODERATE	Y70C5C.1	WBGene00013492	transcript	Y70C5C.1	protein_coding
V	16703433	G	[T]	{G, T}	0.0526316	1	TRUE	FALSE	FALSE	0.100605	57	0	3	54	T	missense_variant	MODERATE	Y70C5C.1	WBGene00013492	transcript	Y70C5C.1	protein_coding
V	16703606	T	[C]	{C, T}	0.0526316	1	TRUE	FALSE	TRUE	0.100605	57	0	3	54	C	missense_variant	MODERATE	Y70C5C.1	WBGene00013492	transcript	Y70C5C.1	protein_coding
V	16703668	C	[T]	{C, T}	0.0526316	1	TRUE	FALSE	TRUE	0.100605	57	0	3	54	T	missense_variant	MODERATE	Y70C5C.1	WBGene00013492	transcript	Y70C5C.1	protein_coding
V	16703783	C	[T]	{C, T}	0.0350877	1	TRUE	FALSE	TRUE	0.0683124	57	0	2	55	T	missense_variant	MODERATE	Y70C5C.1	WBGene00013492	transcript	Y70C5C.1	protein_coding
V	16703813	A	[G]	{G, A}	0.0526316	1	TRUE	FALSE	TRUE	0.100605	57	0	3	54	G	missense_variant	MODERATE	Y70C5C.1	WBGene00013492	transcript	Y70C5C.1	protein_coding
V	16703829	C	[A]	{A, C}	0.140351	1	TRUE	FALSE	FALSE	0.24344	57	0	8	49	A	missense_variant	MODERATE	Y70C5C.1	WBGene00013492	transcript	Y70C5C.1	protein_coding
V	16704026	A	[G]	{G, A}	0.0526316	1	TRUE	FALSE	TRUE	0.100605	57	0	3	54	G	missense_variant	MODERATE	Y70C5C.1	WBGene00013492	transcript	Y70C5C.1	protein_coding
V	16704069	A	[C]	{A, C}	0.333333	1	TRUE	FALSE	FALSE	0.448378	57	0	19	38	C	missense_variant	MODERATE	Y70C5C.1	WBGene00013492	transcript	Y70C5C.1	protein_coding
V	16704153	G	[A]	{G, A}	0.0175439	1	TRUE	FALSE	TRUE	0.0347772	57	0	1	56	A	missense_variant	MODERATE	Y70C5C.1	WBGene00013492	transcript	Y70C5C.1	protein_coding
V	16704160	C	[T]	{C, T}	0.0526316	1	TRUE	FALSE	TRUE	0.100605	57	0	3	54	T	missense_variant	MODERATE	Y70C5C.1	WBGene00013492	transcript	Y70C5C.1	protein_coding
V	16704203	A	[T]	{A, T}	0.0701754	1	TRUE	FALSE	FALSE	0.131657	57	0	4	53	T	missense_variant	MODERATE	Y70C5C.1	WBGene00013492	transcript	Y70C5C.1	protein_coding
V	16704231	A	[G]	{G, A}	0.0526316	1	TRUE	FALSE	TRUE	0.100605	57	0	3	54	G	missense_variant	MODERATE	Y70C5C.1	WBGene00013492	transcript	Y70C5C.1	protein_coding
V	16704264	G	[A]	{G, A}	0.0175439	1	TRUE	FALSE	TRUE	0.0347772	57	0	1	56	A	missense_variant	MODERATE	Y70C5C.1	WBGene00013492	transcript	Y70C5C.1	protein_coding
V	16704367	A	[G]	{G, A}	0.140351	1	TRUE	FALSE	TRUE	0.24344	57	0	8	49	G	missense_variant	MODERATE	Y70C5C.1	WBGene00013492	transcript	Y70C5C.1	protein_coding
V	16705188	A	[G]	{G, A}	0.0701754	1	TRUE	FALSE	TRUE	0.131657	57	0	4	53	G	missense_variant	MODERATE	clec-9	WBGene00013493	transcript	Y70C5C.2	protein_coding
V	16705218	T	[A]	{A, T}	0.0526316	1	TRUE	FALSE	FALSE	0.100605	57	0	3	54	A	missense_variant	MODERATE	clec-9	WBGene00013493	transcript	Y70C5C.2	protein_coding
V	16705473	G	[T]	{G, T}	0.263158	1	TRUE	FALSE	FALSE	0.391244	57	0	15	42	T	missense_variant	MODERATE	clec-9	WBGene00013493	transcript	Y70C5C.2	protein_coding
V	16705685	A	[C]	{A, C}	0.45614	1	TRUE	FALSE	FALSE	0.500543	57	0	26	31	C	missense_variant	MODERATE	clec-9	WBGene00013493	transcript	Y70C5C.2	protein_coding
V	16706180	G	[A]	{G, A}	0.0526316	1	TRUE	FALSE	TRUE	0.100605	57	0	3	54	A	missense_variant	MODERATE	clec-9	WBGene00013493	transcript	Y70C5C.2	protein_coding
V	16706479	G	[T]	{G, T}	0.0175439	1	TRUE	FALSE	FALSE	0.0347772	57	0	1	56	T	missense_variant	MODERATE	clec-9	WBGene00013493	transcript	Y70C5C.2	protein_coding
V	16706607	T	[A]	{A, T}	0.0175439	1	TRUE	FALSE	FALSE	0.0347772	57	0	1	56	A	missense_variant	MODERATE	clec-9	WBGene00013493	transcript	Y70C5C.2	protein_coding
V	16715604	A	[G]	{G, A}	0.0178571	0.982456	TRUE	FALSE	TRUE	0.0353925	56	0	1	55	G	missense_variant	MODERATE	srh-137	WBGene00005354	transcript	Y70C5C.4	protein_coding
V	16715676	A	[G]	{G, A}	0.0714286	0.982456	TRUE	FALSE	TRUE	0.133848	56	0	4	52	G	missense_variant	MODERATE	srh-137	WBGene00005354	transcript	Y70C5C.4	protein_coding
V	16715779	A	[T]	{A, T}	0.0178571	0.982456	TRUE	FALSE	FALSE	0.0353925	56	0	1	55	T	missense_variant	MODERATE	srh-137	WBGene00005354	transcript	Y70C5C.4	protein_coding
V	16715932	C	[T]	{C, T}	0.0714286	0.982456	TRUE	FALSE	TRUE	0.133848	56	0	4	52	T	missense_variant	MODERATE	srh-137	WBGene00005354	transcript	Y70C5C.4	protein_coding
V	16715937	A	[T]	{A, T}	0.0892857	0.982456	TRUE	FALSE	FALSE	0.164093	56	0	5	51	T	missense_variant	MODERATE	srh-137	WBGene00005354	transcript	Y70C5C.4	protein_coding
V	16715976	T	[A, G]	{A, T}	0.0178571	0.982456	TRUE	FALSE	FALSE	0.0353925	56	0	1	55	A	missense_variant	MODERATE	srh-137	WBGene00005354	transcript	Y70C5C.4	protein_coding
V	16715979	G	[A]	{G, A}	0.0178571	0.982456	TRUE	FALSE	TRUE	0.0353925	56	0	1	55	A	missense_variant	MODERATE	srh-137	WBGene00005354	transcript	Y70C5C.4	protein_coding
V	16715986	C	[G]	{G, C}	0.0178571	0.982456	TRUE	FALSE	FALSE	0.0353925	56	0	1	55	G	missense_variant	MODERATE	srh-137	WBGene00005354	transcript	Y70C5C.4	protein_coding
V	16716577	G	[C]	{G, C}	0.446429	0.982456	TRUE	FALSE	FALSE	0.498713	56	0	25	31	C	missense_variant	MODERATE	srh-137	WBGene00005354	transcript	Y70C5C.4	protein_coding
V	16722359	C	[T]	{C, T}	0.107143	0.982456	TRUE	FALSE	TRUE	0.19305	56	0	6	50	T	missense_variant	MODERATE	nhr-112	WBGene00003702	transcript	Y70C5C.6	protein_coding
V	16723010	T	[A]	{A, T}	0.0178571	0.982456	TRUE	FALSE	FALSE	0.0353925	56	0	1	55	A	missense_variant	MODERATE	nhr-112	WBGene00003702	transcript	Y70C5C.6	protein_coding
V	16723061	T	[C]	{C, T}	0.0357143	0.982456	TRUE	FALSE	TRUE	0.0694981	56	0	2	54	C	missense_variant	MODERATE	nhr-112	WBGene00003702	transcript	Y70C5C.6	protein_coding
V	16723298	C	[A]	{A, C}	0.0178571	0.982456	TRUE	FALSE	FALSE	0.0353925	56	0	1	55	A	missense_variant	MODERATE	nhr-112	WBGene00003702	transcript	Y70C5C.6	protein_coding
V	16723359	A	[G]	{G, A}	0.0178571	0.982456	TRUE	FALSE	TRUE	0.0353925	56	0	1	55	G	missense_variant	MODERATE	nhr-112	WBGene00003702	transcript	Y70C5C.6	protein_coding
V	16723389	G	[T]	{G, T}	0.0535714	0.982456	TRUE	FALSE	FALSE	0.102317	56	0	3	53	T	missense_variant	MODERATE	nhr-112	WBGene00003702	transcript	Y70C5C.6	protein_coding
V	16727423	G	[T]	{G, T}	0.0526316	1	TRUE	FALSE	FALSE	0.100605	57	0	3	54	T	missense_variant	MODERATE	T25E12.14	WBGene00077622	transcript	T25E12.14	protein_coding
V	16727536	G	[A]	{G, A}	0.0175439	1	TRUE	FALSE	TRUE	0.0347772	57	0	1	56	A	missense_variant	MODERATE	T25E12.14	WBGene00077622	transcript	T25E12.14	protein_coding
V	16727567	C	[T]	{C, T}	0.45614	1	TRUE	FALSE	TRUE	0.500543	57	0	26	31	T	missense_variant	MODERATE	T25E12.14	WBGene00077622	transcript	T25E12.14	protein_coding
V	16727617	G	[A]	{G, A}	0.0175439	1	TRUE	FALSE	TRUE	0.0347772	57	0	1	56	A	missense_variant	MODERATE	T25E12.14	WBGene00077622	transcript	T25E12.14	protein_coding
V	16727808	A	[G]	{G, A}	0.0701754	1	TRUE	FALSE	TRUE	0.131657	57	0	4	53	G	missense_variant	MODERATE	T25E12.14	WBGene00077622	transcript	T25E12.14	protein_coding
V	16727899	C	[A]	{A, C}	0.0701754	1	TRUE	FALSE	FALSE	0.131657	57	0	4	53	A	missense_variant	MODERATE	T25E12.14	WBGene00077622	transcript	T25E12.14	protein_coding
V	16729155	G	[A]	{G, A}	0.0175439	1	TRUE	FALSE	TRUE	0.0347772	57	0	1	56	A	missense_variant	MODERATE	fbxa-127	WBGene00012027	transcript	T25E12.12	protein_coding
V	16729230	G	[C]	{G, C}	0.0526316	1	TRUE	FALSE	FALSE	0.100605	57	0	3	54	C	missense_variant	MODERATE	fbxa-127	WBGene00012027	transcript	T25E12.12	protein_coding
V	16729275	A	[G]	{G, A}	0.0350877	1	TRUE	FALSE	TRUE	0.0683124	57	0	2	55	G	missense_variant	MODERATE	fbxa-127	WBGene00012027	transcript	T25E12.12	protein_coding
V	16729356	G	[A]	{G, A}	0.0350877	1	TRUE	FALSE	TRUE	0.0683124	57	0	2	55	A	missense_variant	MODERATE	fbxa-127	WBGene00012027	transcript	T25E12.12	protein_coding
V	16729495	G	[T]	{G, T}	0.0350877	1	TRUE	FALSE	FALSE	0.0683124	57	0	2	55	T	missense_variant	MODERATE	fbxa-127	WBGene00012027	transcript	T25E12.12	protein_coding
V	16729514	C	[A, T]	{A, C}	0.140351	1	TRUE	FALSE	FALSE	0.24344	57	0	8	49	A	missense_variant	MODERATE	fbxa-127	WBGene00012027	transcript	T25E12.12	protein_coding
V	16729534	C	[T]	{C, T}	0.0526316	1	TRUE	FALSE	TRUE	0.100605	57	0	3	54	T	missense_variant	MODERATE	fbxa-127	WBGene00012027	transcript	T25E12.12	protein_coding
V	16729579	C	[G]	{G, C}	0.0175439	1	TRUE	FALSE	FALSE	0.0347772	57	0	1	56	G	missense_variant	MODERATE	fbxa-127	WBGene00012027	transcript	T25E12.12	protein_coding
V	16729693	T	[C]	{C, T}	0.0526316	1	TRUE	FALSE	TRUE	0.100605	57	0	3	54	C	missense_variant	MODERATE	fbxa-127	WBGene00012027	transcript	T25E12.12	protein_coding
V	16729813	T	[A]	{A, T}	0.0526316	1	TRUE	FALSE	FALSE	0.100605	57	0	3	54	A	missense_variant	MODERATE	fbxa-127	WBGene00012027	transcript	T25E12.12	protein_coding
V	16729844	A	[G]	{G, A}	0.0526316	1	TRUE	FALSE	TRUE	0.100605	57	0	3	54	G	missense_variant	MODERATE	fbxa-127	WBGene00012027	transcript	T25E12.12	protein_coding
V	16729941	G	[A]	{G, A}	0.140351	1	TRUE	FALSE	TRUE	0.24344	57	0	8	49	A	missense_variant	MODERATE	fbxa-127	WBGene00012027	transcript	T25E12.12	protein_coding
V	16730310	C	[T]	{C, T}	0.0701754	1	TRUE	FALSE	TRUE	0.131657	57	0	4	53	T	missense_variant	MODERATE	srz-99	WBGene00012028	transcript	T25E12.13	protein_coding
V	16730563	G	[A]	{G, A}	0.0175439	1	TRUE	FALSE	TRUE	0.0347772	57	0	1	56	A	missense_variant	MODERATE	srz-99	WBGene00012028	transcript	T25E12.13	protein_coding
V	16730846	C	[A]	{A, C}	0.0526316	1	TRUE	FALSE	FALSE	0.100605	57	0	3	54	A	missense_variant	MODERATE	srz-99	WBGene00012028	transcript	T25E12.13	protein_coding
V	16730951	C	[T]	{C, T}	0.0526316	1	TRUE	FALSE	TRUE	0.100605	57	0	3	54	T	missense_variant	MODERATE	srz-99	WBGene00012028	transcript	T25E12.13	protein_coding
V	16731257	A	[C]	{A, C}	0.45614	1	TRUE	FALSE	FALSE	0.500543	57	0	26	31	C	missense_variant	MODERATE	srz-99	WBGene00012028	transcript	T25E12.13	protein_coding
V	16732024	T	[C]	{C, T}	0.0175439	1	TRUE	FALSE	TRUE	0.0347772	57	0	1	56	C	missense_variant	MODERATE	srz-100	WBGene00012026	transcript	T25E12.11	protein_coding
V	16732239	C	[T]	{C, T}	0.0701754	1	TRUE	FALSE	TRUE	0.131657	57	0	4	53	T	missense_variant	MODERATE	srz-100	WBGene00012026	transcript	T25E12.11	protein_coding
V	16732263	T	[C]	{C, T}	0.0701754	1	TRUE	FALSE	TRUE	0.131657	57	0	4	53	C	missense_variant	MODERATE	srz-100	WBGene00012026	transcript	T25E12.11	protein_coding
V	16732266	T	[A]	{A, T}	0.0701754	1	TRUE	FALSE	FALSE	0.131657	57	0	4	53	A	missense_variant	MODERATE	srz-100	WBGene00012026	transcript	T25E12.11	protein_coding
V	16732407	T	[G]	{G, T}	0.0701754	1	TRUE	FALSE	FALSE	0.131657	57	0	4	53	G	missense_variant	MODERATE	srz-100	WBGene00012026	transcript	T25E12.11	protein_coding
V	16732432	C	[G]	{G, C}	0.0175439	1	TRUE	FALSE	FALSE	0.0347772	57	0	1	56	G	missense_variant	MODERATE	srz-100	WBGene00012026	transcript	T25E12.11	protein_coding
V	16732444	A	[T]	{A, T}	0.0701754	1	TRUE	FALSE	FALSE	0.131657	57	0	4	53	T	missense_variant	MODERATE	srz-100	WBGene00012026	transcript	T25E12.11	protein_coding
V	16732447	T	[C]	{C, T}	0.0701754	1	TRUE	FALSE	TRUE	0.131657	57	0	4	53	C	missense_variant	MODERATE	srz-100	WBGene00012026	transcript	T25E12.11	protein_coding
V	16732461	G	[T]	{G, T}	0.0701754	1	TRUE	FALSE	FALSE	0.131657	57	0	4	53	T	missense_variant	MODERATE	srz-100	WBGene00012026	transcript	T25E12.11	protein_coding
V	16732486	G	[A]	{G, A}	0.0701754	1	TRUE	FALSE	TRUE	0.131657	57	0	4	53	A	missense_variant	MODERATE	srz-100	WBGene00012026	transcript	T25E12.11	protein_coding
V	16732593	A	[C, T]	{A, C}	0.0701754	1	TRUE	FALSE	FALSE	0.131657	57	0	4	53	C	missense_variant	MODERATE	srz-100	WBGene00012026	transcript	T25E12.11	protein_coding
V	16732722	T	[G]	{G, T}	0.0526316	1	TRUE	FALSE	FALSE	0.100605	57	0	3	54	G	missense_variant	MODERATE	srz-100	WBGene00012026	transcript	T25E12.11	protein_coding
V	16732754	G	[A]	{G, A}	0.0701754	1	TRUE	FALSE	TRUE	0.131657	57	0	4	53	A	missense_variant	MODERATE	srz-100	WBGene00012026	transcript	T25E12.11	protein_coding
V	16732774	G	[A]	{G, A}	0.0701754	1	TRUE	FALSE	TRUE	0.131657	57	0	4	53	A	missense_variant	MODERATE	srz-100	WBGene00012026	transcript	T25E12.11	protein_coding
V	16732831	T	[C]	{C, T}	0.122807	1	TRUE	FALSE	TRUE	0.217358	57	0	7	50	C	missense_variant	MODERATE	srz-100	WBGene00012026	transcript	T25E12.11	protein_coding
V	16732941	T	[G]	{G, T}	0.0701754	1	TRUE	FALSE	FALSE	0.131657	57	0	4	53	G	missense_variant	MODERATE	srz-100	WBGene00012026	transcript	T25E12.11	protein_coding
V	16732952	G	[A]	{G, A}	0.0701754	1	TRUE	FALSE	TRUE	0.131657	57	0	4	53	A	missense_variant	MODERATE	srz-100	WBGene00012026	transcript	T25E12.11	protein_coding
V	16732962	G	[A]	{G, A}	0.0701754	1	TRUE	FALSE	TRUE	0.131657	57	0	4	53	A	missense_variant	MODERATE	srz-100	WBGene00012026	transcript	T25E12.11	protein_coding
V	16733049	A	[G]	{G, A}	0.0701754	1	TRUE	FALSE	TRUE	0.131657	57	0	4	53	G	missense_variant	MODERATE	srz-100	WBGene00012026	transcript	T25E12.11	protein_coding
V	16733051	G	[T, C]	{G, T}	0.0701754	1	TRUE	FALSE	FALSE	0.131657	57	0	4	53	C	missense_variant	MODERATE	srz-100	WBGene00012026	transcript	T25E12.11	protein_coding
V	16733085	C	[A]	{A, C}	0.0701754	1	TRUE	FALSE	FALSE	0.131657	57	0	4	53	A	missense_variant	MODERATE	srz-100	WBGene00012026	transcript	T25E12.11	protein_coding
V	16733298	C	[T]	{C, T}	0.0701754	1	TRUE	FALSE	TRUE	0.131657	57	0	4	53	T	missense_variant	MODERATE	T25E12.16	WBGene00194715	transcript	T25E12.16	protein_coding
V	16733357	A	[G]	{G, A}	0.0526316	1	TRUE	FALSE	TRUE	0.100605	57	0	3	54	G	missense_variant	MODERATE	T25E12.16	WBGene00194715	transcript	T25E12.16	protein_coding
V	16733379	G	[C]	{G, C}	0.0701754	1	TRUE	FALSE	FALSE	0.131657	57	0	4	53	C	missense_variant	MODERATE	T25E12.16	WBGene00194715	transcript	T25E12.16	protein_coding
V	16733393	G	[A]	{G, A}	0.0175439	1	TRUE	FALSE	TRUE	0.0347772	57	0	1	56	A	missense_variant	MODERATE	T25E12.16	WBGene00194715	transcript	T25E12.16	protein_coding
V	16733572	C	[T]	{C, T}	0.0701754	1	TRUE	FALSE	TRUE	0.131657	57	0	4	53	T	missense_variant	MODERATE	T25E12.16	WBGene00194715	transcript	T25E12.16	protein_coding
V	16733607	C	[T]	{C, T}	0.0701754	1	TRUE	FALSE	TRUE	0.131657	57	0	4	53	T	missense_variant	MODERATE	T25E12.16	WBGene00194715	transcript	T25E12.16	protein_coding
V	16733624	C	[T]	{C, T}	0.0701754	1	TRUE	FALSE	TRUE	0.131657	57	0	4	53	T	missense_variant	MODERATE	T25E12.16	WBGene00194715	transcript	T25E12.16	protein_coding
V	16733625	C	[T]	{C, T}	0.0701754	1	TRUE	FALSE	TRUE	0.131657	57	0	4	53	T	missense_variant	MODERATE	T25E12.16	WBGene00194715	transcript	T25E12.16	protein_coding
V	16733627	T	[C]	{C, T}	0.0701754	1	TRUE	FALSE	TRUE	0.131657	57	0	4	53	C	missense_variant	MODERATE	T25E12.16	WBGene00194715	transcript	T25E12.16	protein_coding
V	16733633	A	[C]	{A, C}	0.0701754	1	TRUE	FALSE	FALSE	0.131657	57	0	4	53	C	missense_variant	MODERATE	T25E12.16	WBGene00194715	transcript	T25E12.16	protein_coding
V	16733643	A	[G]	{G, A}	0.0701754	1	TRUE	FALSE	TRUE	0.131657	57	0	4	53	G	missense_variant	MODERATE	T25E12.16	WBGene00194715	transcript	T25E12.16	protein_coding
V	16733645	C	[G]	{G, C}	0.0701754	1	TRUE	FALSE	FALSE	0.131657	57	0	4	53	G	missense_variant	MODERATE	T25E12.16	WBGene00194715	transcript	T25E12.16	protein_coding
V	16733665	T	[C]	{C, T}	0.0701754	1	TRUE	FALSE	TRUE	0.131657	57	0	4	53	C	missense_variant	MODERATE	T25E12.16	WBGene00194715	transcript	T25E12.16	protein_coding
V	16733699	G	[C]	{G, C}	0.0175439	1	TRUE	FALSE	FALSE	0.0347772	57	0	1	56	C	missense_variant	MODERATE	T25E12.16	WBGene00194715	transcript	T25E12.16	protein_coding
V	16733703	C	[G]	{G, C}	0.0526316	1	TRUE	FALSE	FALSE	0.100605	57	0	3	54	G	missense_variant	MODERATE	T25E12.16	WBGene00194715	transcript	T25E12.16	protein_coding
V	16734179	C	[T]	{C, T}	0.0701754	1	TRUE	FALSE	TRUE	0.131657	57	0	4	53	T	missense_variant	MODERATE	clec-38	WBGene00012025	transcript	T25E12.10	protein_coding
V	16734184	C	[A]	{A, C}	0.0701754	1	TRUE	FALSE	FALSE	0.131657	57	0	4	53	A	missense_variant	MODERATE	clec-38	WBGene00012025	transcript	T25E12.10	protein_coding
V	16734233	C	[T]	{C, T}	0.157895	1	TRUE	FALSE	TRUE	0.268281	57	0	9	48	T	missense_variant	MODERATE	clec-38	WBGene00012025	transcript	T25E12.10	protein_coding
V	16734629	C	[T]	{C, T}	0.0701754	1	TRUE	FALSE	TRUE	0.131657	57	0	4	53	T	missense_variant&splice_region_variant	MODERATE	clec-38	WBGene00012025	transcript	T25E12.10	protein_coding
V	16734630	G	[A]	{G, A}	0.0701754	1	TRUE	FALSE	TRUE	0.131657	57	0	4	53	A	missense_variant	MODERATE	clec-38	WBGene00012025	transcript	T25E12.10	protein_coding
V	16735020	T	[G]	{G, T}	0.0701754	1	TRUE	FALSE	FALSE	0.131657	57	0	4	53	G	missense_variant	MODERATE	clec-38	WBGene00012025	transcript	T25E12.10	protein_coding
V	16735027	C	[T]	{C, T}	0.0701754	1	TRUE	FALSE	TRUE	0.131657	57	0	4	53	T	missense_variant	MODERATE	clec-38	WBGene00012025	transcript	T25E12.10	protein_coding
V	16735065	C	[T]	{C, T}	0.0701754	1	TRUE	FALSE	TRUE	0.131657	57	0	4	53	T	missense_variant	MODERATE	clec-38	WBGene00012025	transcript	T25E12.10	protein_coding
V	16735078	T	[C]	{C, T}	0.0175439	1	TRUE	FALSE	TRUE	0.0347772	57	0	1	56	C	missense_variant	MODERATE	clec-38	WBGene00012025	transcript	T25E12.10	protein_coding
V	16735092	G	[A]	{G, A}	0.0701754	1	TRUE	FALSE	TRUE	0.131657	57	0	4	53	A	missense_variant	MODERATE	clec-38	WBGene00012025	transcript	T25E12.10	protein_coding
V	16735108	C	[A]	{A, C}	0.0701754	1	TRUE	FALSE	FALSE	0.131657	57	0	4	53	A	missense_variant	MODERATE	clec-38	WBGene00012025	transcript	T25E12.10	protein_coding
V	16735150	C	[T]	{C, T}	0.0701754	1	TRUE	FALSE	TRUE	0.131657	57	0	4	53	T	missense_variant	MODERATE	clec-38	WBGene00012025	transcript	T25E12.10	protein_coding
V	16735159	T	[C]	{C, T}	0.0350877	1	TRUE	FALSE	TRUE	0.0683124	57	0	2	55	C	missense_variant	MODERATE	clec-38	WBGene00012025	transcript	T25E12.10	protein_coding
V	16735275	T	[G]	{G, T}	0.0701754	1	TRUE	FALSE	FALSE	0.131657	57	0	4	53	G	missense_variant	MODERATE	clec-38	WBGene00012025	transcript	T25E12.10	protein_coding
V	16735284	C	[T]	{C, T}	0.0701754	1	TRUE	FALSE	TRUE	0.131657	57	0	4	53	T	missense_variant	MODERATE	clec-38	WBGene00012025	transcript	T25E12.10	protein_coding
V	16735294	T	[C]	{C, T}	0.0701754	1	TRUE	FALSE	TRUE	0.131657	57	0	4	53	C	missense_variant	MODERATE	clec-38	WBGene00012025	transcript	T25E12.10	protein_coding
V	16735302	G	[A]	{G, A}	0.0526316	1	TRUE	FALSE	TRUE	0.100605	57	0	3	54	A	missense_variant	MODERATE	clec-38	WBGene00012025	transcript	T25E12.10	protein_coding
V	16735308	A	[T]	{A, T}	0.0701754	1	TRUE	FALSE	FALSE	0.131657	57	0	4	53	T	missense_variant	MODERATE	clec-38	WBGene00012025	transcript	T25E12.10	protein_coding
V	16735383	A	[G]	{G, A}	0.0701754	1	TRUE	FALSE	TRUE	0.131657	57	0	4	53	G	missense_variant	MODERATE	clec-38	WBGene00012025	transcript	T25E12.10	protein_coding
V	16735389	G	[A]	{G, A}	0.0701754	1	TRUE	FALSE	TRUE	0.131657	57	0	4	53	A	missense_variant	MODERATE	clec-38	WBGene00012025	transcript	T25E12.10	protein_coding
V	16735468	G	[A]	{G, A}	0.0701754	1	TRUE	FALSE	TRUE	0.131657	57	0	4	53	A	missense_variant	MODERATE	clec-38	WBGene00012025	transcript	T25E12.10	protein_coding
V	16735477	G	[A]	{G, A}	0.0701754	1	TRUE	FALSE	TRUE	0.131657	57	0	4	53	A	missense_variant	MODERATE	clec-38	WBGene00012025	transcript	T25E12.10	protein_coding
V	16735485	T	[A]	{A, T}	0.0701754	1	TRUE	FALSE	FALSE	0.131657	57	0	4	53	A	missense_variant	MODERATE	clec-38	WBGene00012025	transcript	T25E12.10	protein_coding
V	16735486	T	[A]	{A, T}	0.140351	1	TRUE	FALSE	FALSE	0.24344	57	0	8	49	A	missense_variant	MODERATE	clec-38	WBGene00012025	transcript	T25E12.10	protein_coding
V	16735519	C	[A]	{A, C}	0.0701754	1	TRUE	FALSE	FALSE	0.131657	57	0	4	53	A	missense_variant	MODERATE	clec-38	WBGene00012025	transcript	T25E12.10	protein_coding
V	16735520	T	[G, A]	{G, T}	0.0701754	1	TRUE	FALSE	FALSE	0.131657	57	0	4	53	A	missense_variant	MODERATE	clec-38	WBGene00012025	transcript	T25E12.10	protein_coding
V	16735521	T	[C]	{C, T}	0.0701754	1	TRUE	FALSE	TRUE	0.131657	57	0	4	53	C	missense_variant	MODERATE	clec-38	WBGene00012025	transcript	T25E12.10	protein_coding
V	16735527	T	[C]	{C, T}	0.0701754	1	TRUE	FALSE	TRUE	0.131657	57	0	4	53	C	missense_variant	MODERATE	clec-38	WBGene00012025	transcript	T25E12.10	protein_coding
V	16735572	G	[A]	{G, A}	0.0175439	1	TRUE	FALSE	TRUE	0.0347772	57	0	1	56	A	missense_variant	MODERATE	clec-38	WBGene00012025	transcript	T25E12.10	protein_coding
V	16735591	C	[T]	{C, T}	0.0701754	1	TRUE	FALSE	TRUE	0.131657	57	0	4	53	T	missense_variant	MODERATE	clec-38	WBGene00012025	transcript	T25E12.10	protein_coding
V	16735771	GGCT	[G]	{GGCT, G}	0.0178571	0.982456	FALSE	TRUE	FALSE	0.0353925	56	0	1	55	G	disruptive_inframe_deletion	MODERATE	clec-34	WBGene00012023	transcript	T25E12.8	protein_coding
V	16735783	T	[C]	{C, T}	0.0701754	1	TRUE	FALSE	TRUE	0.131657	57	0	4	53	C	missense_variant	MODERATE	clec-34	WBGene00012023	transcript	T25E12.8	protein_coding
V	16735792	G	[A]	{G, A}	0.0526316	1	TRUE	FALSE	TRUE	0.100605	57	0	3	54	A	missense_variant	MODERATE	clec-34	WBGene00012023	transcript	T25E12.8	protein_coding
V	16735816	T	[C]	{C, T}	0.0701754	1	TRUE	FALSE	TRUE	0.131657	57	0	4	53	C	missense_variant	MODERATE	clec-34	WBGene00012023	transcript	T25E12.8	protein_coding
V	16735858	A	[G]	{G, A}	0.0701754	1	TRUE	FALSE	TRUE	0.131657	57	0	4	53	G	missense_variant	MODERATE	clec-34	WBGene00012023	transcript	T25E12.8	protein_coding
V	16735871	T	[C]	{C, T}	0.0701754	1	TRUE	FALSE	TRUE	0.131657	57	0	4	53	C	missense_variant	MODERATE	clec-34	WBGene00012023	transcript	T25E12.8	protein_coding
V	16735879	A	[C]	{A, C}	0.0701754	1	TRUE	FALSE	FALSE	0.131657	57	0	4	53	C	missense_variant	MODERATE	clec-34	WBGene00012023	transcript	T25E12.8	protein_coding
V	16735892	G	[T]	{G, T}	0.473684	1	TRUE	FALSE	FALSE	0.503027	57	0	27	30	T	missense_variant	MODERATE	clec-34	WBGene00012023	transcript	T25E12.8	protein_coding
V	16735915	G	[A]	{G, A}	0.0701754	1	TRUE	FALSE	TRUE	0.131657	57	0	4	53	A	missense_variant	MODERATE	clec-34	WBGene00012023	transcript	T25E12.8	protein_coding
V	16735964	A	[T]	{A, T}	0.0701754	1	TRUE	FALSE	FALSE	0.131657	57	0	4	53	T	missense_variant&splice_region_variant	MODERATE	clec-34	WBGene00012023	transcript	T25E12.8	protein_coding
V	16735974	G	[A]	{G, A}	0.0350877	1	TRUE	FALSE	TRUE	0.0683124	57	0	2	55	A	missense_variant	MODERATE	clec-34	WBGene00012023	transcript	T25E12.8	protein_coding
V	16735979	C	[T]	{C, T}	0.0701754	1	TRUE	FALSE	TRUE	0.131657	57	0	4	53	T	missense_variant	MODERATE	clec-34	WBGene00012023	transcript	T25E12.8	protein_coding
V	16735996	T	[A]	{A, T}	0.0701754	1	TRUE	FALSE	FALSE	0.131657	57	0	4	53	A	missense_variant	MODERATE	clec-34	WBGene00012023	transcript	T25E12.8	protein_coding
V	16736142	C	[T]	{C, T}	0.0701754	1	TRUE	FALSE	TRUE	0.131657	57	0	4	53	T	missense_variant	MODERATE	clec-34	WBGene00012023	transcript	T25E12.8	protein_coding
V	16736172	A	[T]	{A, T}	0.157895	1	TRUE	FALSE	FALSE	0.268281	57	0	9	48	T	missense_variant	MODERATE	clec-34	WBGene00012023	transcript	T25E12.8	protein_coding
V	16736223	G	[C]	{G, C}	0.0175439	1	TRUE	FALSE	FALSE	0.0347772	57	0	1	56	C	missense_variant	MODERATE	clec-34	WBGene00012023	transcript	T25E12.8	protein_coding
V	16736350	G	[A]	{G, A}	0.157895	1	TRUE	FALSE	TRUE	0.268281	57	0	9	48	A	missense_variant	MODERATE	clec-34	WBGene00012023	transcript	T25E12.8	protein_coding
V	16736355	A	[T]	{A, T}	0.157895	1	TRUE	FALSE	FALSE	0.268281	57	0	9	48	T	missense_variant	MODERATE	clec-34	WBGene00012023	transcript	T25E12.8	protein_coding
V	16736375	T	[G]	{G, T}	0.157895	1	TRUE	FALSE	FALSE	0.268281	57	0	9	48	G	missense_variant	MODERATE	clec-34	WBGene00012023	transcript	T25E12.8	protein_coding
V	16736894	T	[G]	{G, T}	0.157895	1	TRUE	FALSE	FALSE	0.268281	57	0	9	48	G	missense_variant	MODERATE	clec-34	WBGene00012023	transcript	T25E12.8	protein_coding
V	16736895	A	[G]	{G, A}	0.157895	1	TRUE	FALSE	TRUE	0.268281	57	0	9	48	G	missense_variant	MODERATE	clec-34	WBGene00012023	transcript	T25E12.8	protein_coding
V	16737029	C	[A]	{A, C}	0.140351	1	TRUE	FALSE	FALSE	0.24344	57	0	8	49	A	missense_variant&splice_region_variant	MODERATE	clec-34	WBGene00012023	transcript	T25E12.8	protein_coding
V	16737166	T	[A]	{A, T}	0.157895	1	TRUE	FALSE	FALSE	0.268281	57	0	9	48	A	missense_variant	MODERATE	clec-34	WBGene00012023	transcript	T25E12.8	protein_coding
V	16737177	A	[G]	{G, A}	0.0175439	1	TRUE	FALSE	TRUE	0.0347772	57	0	1	56	G	missense_variant	MODERATE	clec-34	WBGene00012023	transcript	T25E12.8	protein_coding
V	16737286	C	[T]	{C, T}	0.0701754	1	TRUE	FALSE	TRUE	0.131657	57	0	4	53	T	missense_variant	MODERATE	clec-34	WBGene00012023	transcript	T25E12.8	protein_coding
V	16737772	T	[C]	{C, T}	0.0192308	0.912281	TRUE	FALSE	TRUE	0.0380881	52	0	1	51	C	missense_variant	MODERATE	clec-29	WBGene00012024	transcript	T25E12.9	protein_coding
V	16737995	G	[A]	{G, A}	0.140351	1	TRUE	FALSE	TRUE	0.24344	57	0	8	49	A	missense_variant	MODERATE	clec-29	WBGene00012024	transcript	T25E12.9	protein_coding
V	16738074	C	[A]	{A, C}	0.0175439	1	TRUE	FALSE	FALSE	0.0347772	57	0	1	56	A	missense_variant	MODERATE	clec-29	WBGene00012024	transcript	T25E12.9	protein_coding
V	16738100	G	[A]	{G, A}	0.0175439	1	TRUE	FALSE	TRUE	0.0347772	57	0	1	56	A	missense_variant	MODERATE	clec-29	WBGene00012024	transcript	T25E12.9	protein_coding
V	16738115	A	[G]	{G, A}	0.157895	1	TRUE	FALSE	TRUE	0.268281	57	0	9	48	G	missense_variant	MODERATE	clec-29	WBGene00012024	transcript	T25E12.9	protein_coding
V	16738141	T	[G]	{G, T}	0.140351	1	TRUE	FALSE	FALSE	0.24344	57	0	8	49	G	missense_variant	MODERATE	clec-29	WBGene00012024	transcript	T25E12.9	protein_coding
V	16738204	C	[A]	{A, C}	0.157895	1	TRUE	FALSE	FALSE	0.268281	57	0	9	48	A	missense_variant	MODERATE	clec-29	WBGene00012024	transcript	T25E12.9	protein_coding
V	16738284	T	[A]	{A, T}	0.157895	1	TRUE	FALSE	FALSE	0.268281	57	0	9	48	A	missense_variant	MODERATE	clec-29	WBGene00012024	transcript	T25E12.9	protein_coding
V	16738297	C	[T]	{C, T}	0.0175439	1	TRUE	FALSE	TRUE	0.0347772	57	0	1	56	T	missense_variant	MODERATE	clec-29	WBGene00012024	transcript	T25E12.9	protein_coding
V	16738307	G	[A, C]	{G, C}	0.0175439	1	TRUE	FALSE	FALSE	0.0347772	57	0	1	56	C	missense_variant	MODERATE	clec-29	WBGene00012024	transcript	T25E12.9	protein_coding
V	16738388	C	[A]	{A, C}	0.157895	1	TRUE	FALSE	FALSE	0.268281	57	0	9	48	A	missense_variant	MODERATE	clec-29	WBGene00012024	transcript	T25E12.9	protein_coding
V	16738396	C	[T]	{C, T}	0.0175439	1	TRUE	FALSE	TRUE	0.0347772	57	0	1	56	T	missense_variant	MODERATE	clec-29	WBGene00012024	transcript	T25E12.9	protein_coding
V	16738402	A	[G]	{G, A}	0.140351	1	TRUE	FALSE	TRUE	0.24344	57	0	8	49	G	missense_variant	MODERATE	clec-29	WBGene00012024	transcript	T25E12.9	protein_coding
V	16738493	G	[C]	{G, C}	0.157895	1	TRUE	FALSE	FALSE	0.268281	57	0	9	48	C	missense_variant	MODERATE	clec-29	WBGene00012024	transcript	T25E12.9	protein_coding
V	16738555	C	[A]	{A, C}	0.0175439	1	TRUE	FALSE	FALSE	0.0347772	57	0	1	56	A	missense_variant	MODERATE	clec-29	WBGene00012024	transcript	T25E12.9	protein_coding
V	16738564	T	[C]	{C, T}	0.0175439	1	TRUE	FALSE	TRUE	0.0347772	57	0	1	56	C	missense_variant	MODERATE	clec-29	WBGene00012024	transcript	T25E12.9	protein_coding
V	16738614	G	[C, A]	{G, C}	0.0175439	1	TRUE	FALSE	FALSE	0.0347772	57	0	1	56	A	missense_variant	MODERATE	clec-29	WBGene00012024	transcript	T25E12.9	protein_coding
V	16738652	T	[G]	{G, T}	0.157895	1	TRUE	FALSE	FALSE	0.268281	57	0	9	48	G	missense_variant	MODERATE	clec-29	WBGene00012024	transcript	T25E12.9	protein_coding
V	16738660	C	[T]	{C, T}	0.157895	1	TRUE	FALSE	TRUE	0.268281	57	0	9	48	T	missense_variant	MODERATE	clec-29	WBGene00012024	transcript	T25E12.9	protein_coding
V	16738691	A	[C]	{A, C}	0.157895	1	TRUE	FALSE	FALSE	0.268281	57	0	9	48	C	missense_variant	MODERATE	clec-29	WBGene00012024	transcript	T25E12.9	protein_coding
V	16738696	A	[G]	{G, A}	0.157895	1	TRUE	FALSE	TRUE	0.268281	57	0	9	48	G	missense_variant&splice_region_variant	MODERATE	clec-29	WBGene00012024	transcript	T25E12.9	protein_coding
V	16738779	G	[T]	{G, T}	0.140351	1	TRUE	FALSE	FALSE	0.24344	57	0	8	49	T	missense_variant&splice_region_variant	MODERATE	clec-29	WBGene00012024	transcript	T25E12.9	protein_coding
V	16738821	T	[C]	{C, T}	0.140351	1	TRUE	FALSE	TRUE	0.24344	57	0	8	49	C	missense_variant	MODERATE	clec-29	WBGene00012024	transcript	T25E12.9	protein_coding
V	16738825	A	[G]	{G, A}	0.140351	1	TRUE	FALSE	TRUE	0.24344	57	0	8	49	G	missense_variant	MODERATE	clec-29	WBGene00012024	transcript	T25E12.9	protein_coding
V	16738826	T	[A]	{A, T}	0.140351	1	TRUE	FALSE	FALSE	0.24344	57	0	8	49	A	missense_variant	MODERATE	clec-29	WBGene00012024	transcript	T25E12.9	protein_coding
V	16738885	G	[A]	{G, A}	0.0175439	1	TRUE	FALSE	TRUE	0.0347772	57	0	1	56	A	missense_variant	MODERATE	clec-29	WBGene00012024	transcript	T25E12.9	protein_coding
V	16738891	T	[C]	{C, T}	0.0175439	1	TRUE	FALSE	TRUE	0.0347772	57	0	1	56	C	missense_variant	MODERATE	clec-29	WBGene00012024	transcript	T25E12.9	protein_coding
V	16738894	G	[A]	{G, A}	0.140351	1	TRUE	FALSE	TRUE	0.24344	57	0	8	49	A	missense_variant	MODERATE	clec-29	WBGene00012024	transcript	T25E12.9	protein_coding
V	16738907	G	[T]	{G, T}	0.140351	1	TRUE	FALSE	FALSE	0.24344	57	0	8	49	T	missense_variant	MODERATE	clec-29	WBGene00012024	transcript	T25E12.9	protein_coding
V	16738909	C	[G]	{G, C}	0.140351	1	TRUE	FALSE	FALSE	0.24344	57	0	8	49	G	missense_variant	MODERATE	clec-29	WBGene00012024	transcript	T25E12.9	protein_coding
V	16738920	A	[G]	{G, A}	0.157895	1	TRUE	FALSE	TRUE	0.268281	57	0	9	48	G	missense_variant	MODERATE	clec-29	WBGene00012024	transcript	T25E12.9	protein_coding
V	16738954	A	[T, G]	{G, A, T}	0.157895	1	TRUE	FALSE	FALSE	0.268281	57	0	9	48	G	missense_variant&splice_region_variant	MODERATE	clec-29	WBGene00012024	transcript	T25E12.9	protein_coding
V	16739005	G	[T]	{G, T}	0.0175439	1	TRUE	FALSE	FALSE	0.0347772	57	0	1	56	T	missense_variant&splice_region_variant	MODERATE	clec-29	WBGene00012024	transcript	T25E12.9	protein_coding
V	16739006	C	[T]	{C, T}	0.140351	1	TRUE	FALSE	TRUE	0.24344	57	0	8	49	T	missense_variant	MODERATE	clec-29	WBGene00012024	transcript	T25E12.9	protein_coding
V	16739014	G	[T]	{G, T}	0.140351	1	TRUE	FALSE	FALSE	0.24344	57	0	8	49	T	missense_variant	MODERATE	clec-29	WBGene00012024	transcript	T25E12.9	protein_coding
V	16739018	G	[A]	{G, A}	0.0526316	1	TRUE	FALSE	TRUE	0.100605	57	0	3	54	A	missense_variant	MODERATE	clec-29	WBGene00012024	transcript	T25E12.9	protein_coding
V	16739022	C	[A]	{A, C}	0.0175439	1	TRUE	FALSE	FALSE	0.0347772	57	0	1	56	A	missense_variant	MODERATE	clec-29	WBGene00012024	transcript	T25E12.9	protein_coding
V	16739065	C	[A]	{A, C}	0.0175439	1	TRUE	FALSE	FALSE	0.0347772	57	0	1	56	A	missense_variant	MODERATE	clec-29	WBGene00012024	transcript	T25E12.9	protein_coding
V	16739066	A	[T]	{A, T}	0.0175439	1	TRUE	FALSE	FALSE	0.0347772	57	0	1	56	T	missense_variant	MODERATE	clec-29	WBGene00012024	transcript	T25E12.9	protein_coding
V	16739074	G	[C, A]	{G, C}	0.245614	1	TRUE	FALSE	FALSE	0.373855	57	0	14	43	A	missense_variant	MODERATE	clec-29	WBGene00012024	transcript	T25E12.9	protein_coding
V	16739093	A	[T]	{A, T}	0.140351	1	TRUE	FALSE	FALSE	0.24344	57	0	8	49	T	missense_variant	MODERATE	clec-29	WBGene00012024	transcript	T25E12.9	protein_coding
V	16739120	G	[C]	{G, C}	0.157895	1	TRUE	FALSE	FALSE	0.268281	57	0	9	48	C	missense_variant	MODERATE	clec-29	WBGene00012024	transcript	T25E12.9	protein_coding
V	16739138	G	[C]	{G, C}	0.0526316	1	TRUE	FALSE	FALSE	0.100605	57	0	3	54	C	missense_variant	MODERATE	clec-29	WBGene00012024	transcript	T25E12.9	protein_coding
V	16739145	A	[C]	{A, C}	0.157895	1	TRUE	FALSE	FALSE	0.268281	57	0	9	48	C	missense_variant	MODERATE	clec-29	WBGene00012024	transcript	T25E12.9	protein_coding
V	16739153	G	[A, T]	{G, A}	0.157895	1	TRUE	FALSE	FALSE	0.268281	57	0	9	48	A	missense_variant	MODERATE	clec-29	WBGene00012024	transcript	T25E12.9	protein_coding
V	16739158	G	[C, A]	{G, C}	0.0175439	1	TRUE	FALSE	FALSE	0.0347772	57	0	1	56	A	missense_variant	MODERATE	clec-29	WBGene00012024	transcript	T25E12.9	protein_coding
V	16739189	G	[A]	{G, A}	0.0175439	1	TRUE	FALSE	TRUE	0.0347772	57	0	1	56	A	missense_variant	MODERATE	clec-29	WBGene00012024	transcript	T25E12.9	protein_coding
V	16739293	C	[T]	{C, T}	0.157895	1	TRUE	FALSE	TRUE	0.268281	57	0	9	48	T	missense_variant	MODERATE	clec-39	WBGene00012022	transcript	T25E12.7	protein_coding
V	16739329	T	[C]	{C, T}	0.0175439	1	TRUE	FALSE	TRUE	0.0347772	57	0	1	56	C	missense_variant	MODERATE	clec-39	WBGene00012022	transcript	T25E12.7	protein_coding
V	16739332	C	[A]	{A, C}	0.140351	1	TRUE	FALSE	FALSE	0.24344	57	0	8	49	A	missense_variant	MODERATE	clec-39	WBGene00012022	transcript	T25E12.7	protein_coding
V	16739334	C	[T, A]	{C, T}	0.140351	1	TRUE	FALSE	FALSE	0.24344	57	0	8	49	A	missense_variant	MODERATE	clec-39	WBGene00012022	transcript	T25E12.7	protein_coding
V	16739337	A	[G]	{G, A}	0.0175439	1	TRUE	FALSE	TRUE	0.0347772	57	0	1	56	G	missense_variant	MODERATE	clec-39	WBGene00012022	transcript	T25E12.7	protein_coding
V	16739340	A	[G]	{G, A}	0.0175439	1	TRUE	FALSE	TRUE	0.0347772	57	0	1	56	G	missense_variant	MODERATE	clec-39	WBGene00012022	transcript	T25E12.7	protein_coding
V	16739344	G	[C]	{G, C}	0.0175439	1	TRUE	FALSE	FALSE	0.0347772	57	0	1	56	C	missense_variant	MODERATE	clec-39	WBGene00012022	transcript	T25E12.7	protein_coding
V	16739379	A	[C]	{A, C}	0.0175439	1	TRUE	FALSE	FALSE	0.0347772	57	0	1	56	C	missense_variant	MODERATE	clec-39	WBGene00012022	transcript	T25E12.7	protein_coding
V	16739403	G	[A, T]	{G, A}	0.140351	1	TRUE	FALSE	FALSE	0.24344	57	0	8	49	A	missense_variant	MODERATE	clec-39	WBGene00012022	transcript	T25E12.7	protein_coding
V	16739406	A	[G]	{G, A}	0.157895	1	TRUE	FALSE	TRUE	0.268281	57	0	9	48	G	missense_variant	MODERATE	clec-39	WBGene00012022	transcript	T25E12.7	protein_coding
V	16739425	T	[C]	{C, T}	0.157895	1	TRUE	FALSE	TRUE	0.268281	57	0	9	48	C	missense_variant	MODERATE	clec-39	WBGene00012022	transcript	T25E12.7	protein_coding
V	16739429	A	[T]	{A, T}	0.157895	1	TRUE	FALSE	FALSE	0.268281	57	0	9	48	T	missense_variant	MODERATE	clec-39	WBGene00012022	transcript	T25E12.7	protein_coding
V	16739436	A	[C, G]	{G, A, C}	0.157895	1	TRUE	FALSE	FALSE	0.268281	57	0	9	48	C	missense_variant	MODERATE	clec-39	WBGene00012022	transcript	T25E12.7	protein_coding
V	16739457	G	[A]	{G, A}	0.157895	1	TRUE	FALSE	TRUE	0.268281	57	0	9	48	A	missense_variant	MODERATE	clec-39	WBGene00012022	transcript	T25E12.7	protein_coding
V	16739478	G	[A]	{G, A}	0.140351	1	TRUE	FALSE	TRUE	0.24344	57	0	8	49	A	missense_variant	MODERATE	clec-39	WBGene00012022	transcript	T25E12.7	protein_coding
V	16739487	T	[C]	{C, T}	0.0175439	1	TRUE	FALSE	TRUE	0.0347772	57	0	1	56	C	missense_variant	MODERATE	clec-39	WBGene00012022	transcript	T25E12.7	protein_coding
V	16739549	C	[A]	{A, C}	0.157895	1	TRUE	FALSE	FALSE	0.268281	57	0	9	48	A	missense_variant&splice_region_variant	MODERATE	clec-39	WBGene00012022	transcript	T25E12.7	protein_coding
V	16739559	A	[C]	{A, C}	0.0175439	1	TRUE	FALSE	FALSE	0.0347772	57	0	1	56	C	missense_variant	MODERATE	clec-39	WBGene00012022	transcript	T25E12.7	protein_coding
V	16739565	C	[G]	{G, C}	0.0175439	1	TRUE	FALSE	FALSE	0.0347772	57	0	1	56	G	missense_variant	MODERATE	clec-39	WBGene00012022	transcript	T25E12.7	protein_coding
V	16739578	A	[C]	{A, C}	0.0175439	1	TRUE	FALSE	FALSE	0.0347772	57	0	1	56	C	missense_variant	MODERATE	clec-39	WBGene00012022	transcript	T25E12.7	protein_coding
V	16739581	T	[G]	{G, T}	0.157895	1	TRUE	FALSE	FALSE	0.268281	57	0	9	48	G	missense_variant	MODERATE	clec-39	WBGene00012022	transcript	T25E12.7	protein_coding
V	16739591	A	[G, T]	{G, A, T}	0.157895	1	TRUE	FALSE	FALSE	0.268281	57	0	9	48	G	missense_variant	MODERATE	clec-39	WBGene00012022	transcript	T25E12.7	protein_coding
V	16739610	A	[T]	{A, T}	0.0175439	1	TRUE	FALSE	FALSE	0.0347772	57	0	1	56	T	missense_variant&splice_region_variant	MODERATE	clec-39	WBGene00012022	transcript	T25E12.7	protein_coding
V	16739664	A	[T]	{A, T}	0.0175439	1	TRUE	FALSE	FALSE	0.0347772	57	0	1	56	T	missense_variant	MODERATE	clec-39	WBGene00012022	transcript	T25E12.7	protein_coding
V	16739698	C	[T]	{C, T}	0.0175439	1	TRUE	FALSE	TRUE	0.0347772	57	0	1	56	T	missense_variant	MODERATE	clec-39	WBGene00012022	transcript	T25E12.7	protein_coding
V	16739704	C	[T]	{C, T}	0.0175439	1	TRUE	FALSE	TRUE	0.0347772	57	0	1	56	T	missense_variant	MODERATE	clec-39	WBGene00012022	transcript	T25E12.7	protein_coding
V	16739711	A	[G, C]	{G, A, C}	0.157895	1	TRUE	FALSE	FALSE	0.268281	57	0	9	48	G	missense_variant	MODERATE	clec-39	WBGene00012022	transcript	T25E12.7	protein_coding
V	16740570	T	[C]	{C, T}	0.157895	1	TRUE	FALSE	TRUE	0.268281	57	0	9	48	C	missense_variant	MODERATE	clec-39	WBGene00012022	transcript	T25E12.7	protein_coding
V	16740573	T	[G]	{G, T}	0.140351	1	TRUE	FALSE	FALSE	0.24344	57	0	8	49	G	missense_variant	MODERATE	clec-39	WBGene00012022	transcript	T25E12.7	protein_coding
V	16740621	G	[A]	{G, A}	0.0175439	1	TRUE	FALSE	TRUE	0.0347772	57	0	1	56	A	missense_variant	MODERATE	clec-39	WBGene00012022	transcript	T25E12.7	protein_coding
V	16740659	T	[G]	{G, T}	0.157895	1	TRUE	FALSE	FALSE	0.268281	57	0	9	48	G	missense_variant	MODERATE	clec-39	WBGene00012022	transcript	T25E12.7	protein_coding
V	16740836	C	[G]	{G, C}	0.0175439	1	TRUE	FALSE	FALSE	0.0347772	57	0	1	56	G	missense_variant&splice_region_variant	MODERATE	clec-39	WBGene00012022	transcript	T25E12.7	protein_coding
V	16740841	G	[A]	{G, A}	0.0175439	1	TRUE	FALSE	TRUE	0.0347772	57	0	1	56	A	missense_variant	MODERATE	clec-39	WBGene00012022	transcript	T25E12.7	protein_coding
V	16740852	C	[A]	{A, C}	0.157895	1	TRUE	FALSE	FALSE	0.268281	57	0	9	48	A	missense_variant	MODERATE	clec-39	WBGene00012022	transcript	T25E12.7	protein_coding
V	16740861	A	[C]	{A, C}	0.0175439	1	TRUE	FALSE	FALSE	0.0347772	57	0	1	56	C	missense_variant	MODERATE	clec-39	WBGene00012022	transcript	T25E12.7	protein_coding
V	16740889	C	[T]	{C, T}	0.140351	1	TRUE	FALSE	TRUE	0.24344	57	0	8	49	T	missense_variant	MODERATE	clec-39	WBGene00012022	transcript	T25E12.7	protein_coding
V	16740914	A	[T]	{A, T}	0.0175439	1	TRUE	FALSE	FALSE	0.0347772	57	0	1	56	T	missense_variant	MODERATE	clec-39	WBGene00012022	transcript	T25E12.7	protein_coding
V	16740922	C	[T]	{C, T}	0.140351	1	TRUE	FALSE	TRUE	0.24344	57	0	8	49	T	missense_variant	MODERATE	clec-39	WBGene00012022	transcript	T25E12.7	protein_coding
V	16740927	A	[G]	{G, A}	0.0175439	1	TRUE	FALSE	TRUE	0.0347772	57	0	1	56	G	missense_variant	MODERATE	clec-39	WBGene00012022	transcript	T25E12.7	protein_coding
V	16740954	G	[T]	{G, T}	0.0175439	1	TRUE	FALSE	FALSE	0.0347772	57	0	1	56	T	missense_variant	MODERATE	clec-39	WBGene00012022	transcript	T25E12.7	protein_coding
V	16741029	C	[T]	{C, T}	0.0175439	1	TRUE	FALSE	TRUE	0.0347772	57	0	1	56	T	missense_variant	MODERATE	clec-39	WBGene00012022	transcript	T25E12.7	protein_coding
V	16741033	A	[G]	{G, A}	0.0175439	1	TRUE	FALSE	TRUE	0.0347772	57	0	1	56	G	missense_variant	MODERATE	clec-39	WBGene00012022	transcript	T25E12.7	protein_coding
V	16741061	C	[G]	{G, C}	0.0175439	1	TRUE	FALSE	FALSE	0.0347772	57	0	1	56	G	missense_variant	MODERATE	clec-39	WBGene00012022	transcript	T25E12.7	protein_coding
V	16741114	T	[C]	{C, T}	0.157895	1	TRUE	FALSE	TRUE	0.268281	57	0	9	48	C	missense_variant	MODERATE	clec-39	WBGene00012022	transcript	T25E12.7	protein_coding
V	16741359	A	[C]	{A, C}	0.0701754	1	TRUE	FALSE	FALSE	0.131657	57	0	4	53	C	missense_variant	MODERATE	clec-39	WBGene00012022	transcript	T25E12.7	protein_coding
V	16741478	C	[T]	{C, T}	0.0526316	1	TRUE	FALSE	TRUE	0.100605	57	0	3	54	T	missense_variant	MODERATE	clec-39	WBGene00012022	transcript	T25E12.7	protein_coding
V	16741581	G	[C]	{G, C}	0.22807	1	TRUE	FALSE	FALSE	0.355224	57	0	13	44	C	missense_variant	MODERATE	clec-39	WBGene00012022	transcript	T25E12.7	protein_coding
V	16742643	G	[C]	{G, C}	0.0877193	1	TRUE	FALSE	FALSE	0.161466	57	0	5	52	C	missense_variant	MODERATE	T25E12.6	WBGene00012021	transcript	T25E12.6	protein_coding
V	16742665	A	[T]	{A, T}	0.157895	1	TRUE	FALSE	FALSE	0.268281	57	0	9	48	T	missense_variant	MODERATE	T25E12.6	WBGene00012021	transcript	T25E12.6	protein_coding
V	16742779	G	[A]	{G, A}	0.0526316	1	TRUE	FALSE	TRUE	0.100605	57	0	3	54	A	missense_variant	MODERATE	T25E12.6	WBGene00012021	transcript	T25E12.6	protein_coding
V	16742807	A	[T]	{A, T}	0.157895	1	TRUE	FALSE	FALSE	0.268281	57	0	9	48	T	missense_variant	MODERATE	T25E12.6	WBGene00012021	transcript	T25E12.6	protein_coding
V	16742969	C	[G]	{G, C}	0.157895	1	TRUE	FALSE	FALSE	0.268281	57	0	9	48	G	missense_variant	MODERATE	T25E12.6	WBGene00012021	transcript	T25E12.6	protein_coding
V	16743067	C	[G, T]	{G, C}	0.0526316	1	TRUE	FALSE	FALSE	0.100605	57	0	3	54	G	missense_variant	MODERATE	T25E12.6	WBGene00012021	transcript	T25E12.6	protein_coding
V	16743079	T	[C]	{C, T}	0.0526316	1	TRUE	FALSE	TRUE	0.100605	57	0	3	54	C	missense_variant	MODERATE	T25E12.6	WBGene00012021	transcript	T25E12.6	protein_coding
V	16743524	T	[C]	{C, T}	0.157895	1	TRUE	FALSE	TRUE	0.268281	57	0	9	48	C	missense_variant&splice_region_variant	MODERATE	T25E12.6	WBGene00012021	transcript	T25E12.6	protein_coding
V	16743719	G	[A]	{G, A}	0.157895	1	TRUE	FALSE	TRUE	0.268281	57	0	9	48	A	missense_variant	MODERATE	T25E12.6	WBGene00012021	transcript	T25E12.6	protein_coding
V	16744654	C	[T]	{C, T}	0.0526316	1	TRUE	FALSE	TRUE	0.100605	57	0	3	54	T	missense_variant	MODERATE	T25E12.6	WBGene00012021	transcript	T25E12.6	protein_coding
V	16744713	A	[T]	{A, T}	0.157895	1	TRUE	FALSE	FALSE	0.268281	57	0	9	48	T	missense_variant	MODERATE	T25E12.6	WBGene00012021	transcript	T25E12.6	protein_coding
V	16744760	A	[T]	{A, T}	0.157895	1	TRUE	FALSE	FALSE	0.268281	57	0	9	48	T	missense_variant	MODERATE	T25E12.6	WBGene00012021	transcript	T25E12.6	protein_coding
V	16745260	A	[T]	{A, T}	0.105263	1	TRUE	FALSE	FALSE	0.190033	57	0	6	51	T	missense_variant	MODERATE	gyg-2	WBGene00012020	transcript	T25E12.5	protein_coding
V	16745348	T	[A]	{A, T}	0.0175439	1	TRUE	FALSE	FALSE	0.0347772	57	0	1	56	A	missense_variant	MODERATE	gyg-2	WBGene00012020	transcript	T25E12.5	protein_coding
V	16745380	G	[A]	{G, A}	0.0175439	1	TRUE	FALSE	TRUE	0.0347772	57	0	1	56	A	missense_variant	MODERATE	gyg-2	WBGene00012020	transcript	T25E12.5	protein_coding
V	16745389	G	[C]	{G, C}	0.105263	1	TRUE	FALSE	FALSE	0.190033	57	0	6	51	C	missense_variant	MODERATE	gyg-2	WBGene00012020	transcript	T25E12.5	protein_coding
V	16745416	A	[T]	{A, T}	0.105263	1	TRUE	FALSE	FALSE	0.190033	57	0	6	51	T	missense_variant	MODERATE	gyg-2	WBGene00012020	transcript	T25E12.5	protein_coding
V	16745467	T	[G]	{G, T}	0.22807	1	TRUE	FALSE	FALSE	0.355224	57	0	13	44	G	missense_variant	MODERATE	gyg-2	WBGene00012020	transcript	T25E12.5	protein_coding
V	16745468	C	[CCGA]	{CCGA, C}	0.105263	1	FALSE	TRUE	FALSE	0.190033	57	0	6	51	CCGA	conservative_inframe_insertion	MODERATE	gyg-2	WBGene00012020	transcript	T25E12.5	protein_coding
V	16745469	C	[CGAT, CGAA]	{CGAT, C}	0.0178571	0.982456	FALSE	TRUE	FALSE	0.0353925	56	0	1	55	CGAA	disruptive_inframe_insertion	MODERATE	gyg-2	WBGene00012020	transcript	T25E12.5	protein_coding
V	16745471	A	[ACGG, ACGT]	{A, ACGT}	0.0175439	1	FALSE	TRUE	FALSE	0.0347772	57	0	1	56	ACGG	conservative_inframe_insertion	MODERATE	gyg-2	WBGene00012020	transcript	T25E12.5	protein_coding
V	16745473	G	[GACT, GACC]	{G, GACT}	0.0175439	1	FALSE	TRUE	FALSE	0.0347772	57	0	1	56	GACC	conservative_inframe_insertion	MODERATE	gyg-2	WBGene00012020	transcript	T25E12.5	protein_coding
V	16745693	A	[C]	{A, C}	0.105263	1	TRUE	FALSE	FALSE	0.190033	57	0	6	51	C	missense_variant	MODERATE	gyg-2	WBGene00012020	transcript	T25E12.5	protein_coding
V	16745852	T	[C, G]	{C, T}	0.105263	1	TRUE	FALSE	FALSE	0.190033	57	0	6	51	G	missense_variant	MODERATE	gyg-2	WBGene00012020	transcript	T25E12.5	protein_coding
V	16746042	T	[C]	{C, T}	0.105263	1	TRUE	FALSE	TRUE	0.190033	57	0	6	51	C	missense_variant	MODERATE	gyg-2	WBGene00012020	transcript	T25E12.5	protein_coding
V	16746045	A	[T]	{A, T}	0.245614	1	TRUE	FALSE	FALSE	0.373855	57	0	14	43	T	missense_variant	MODERATE	gyg-2	WBGene00012020	transcript	T25E12.5	protein_coding
V	16746052	T	[C]	{C, T}	0.421053	1	TRUE	FALSE	TRUE	0.491849	57	0	24	33	C	missense_variant	MODERATE	gyg-2	WBGene00012020	transcript	T25E12.5	protein_coding
V	16747770	T	[G]	{G, T}	0.105263	1	TRUE	FALSE	FALSE	0.190033	57	0	6	51	G	missense_variant	MODERATE	dkf-2	WBGene00012019	transcript	T25E12.4f	protein_coding
V	16747780	G	[GAAA]	{G, GAAA}	0.105263	1	FALSE	TRUE	FALSE	0.190033	57	0	6	51	GAAA	disruptive_inframe_insertion	MODERATE	dkf-2	WBGene00012019	transcript	T25E12.4f	protein_coding
V	16747921	A	[T]	{A, T}	0.0526316	1	TRUE	FALSE	FALSE	0.100605	57	0	3	54	T	missense_variant	MODERATE	dkf-2	WBGene00012019	transcript	T25E12.4f	protein_coding
V	16756785	T	[A]	{A, T}	0.0175439	1	TRUE	FALSE	FALSE	0.0347772	57	0	1	56	A	missense_variant	MODERATE	dkf-2	WBGene00012019	transcript	T25E12.4f	protein_coding
V	16756899	A	[C]	{A, C}	0.157895	1	TRUE	FALSE	FALSE	0.268281	57	0	9	48	C	missense_variant	MODERATE	dkf-2	WBGene00012019	transcript	T25E12.4f	protein_coding
V	16756905	C	[T]	{C, T}	0.105263	1	TRUE	FALSE	TRUE	0.190033	57	0	6	51	T	missense_variant	MODERATE	dkf-2	WBGene00012019	transcript	T25E12.4f	protein_coding
V	16756931	G	[A]	{G, A}	0.0175439	1	TRUE	FALSE	TRUE	0.0347772	57	0	1	56	A	missense_variant	MODERATE	dkf-2	WBGene00012019	transcript	T25E12.4f	protein_coding
V	16756935	G	[C]	{G, C}	0.105263	1	TRUE	FALSE	FALSE	0.190033	57	0	6	51	C	missense_variant	MODERATE	dkf-2	WBGene00012019	transcript	T25E12.4f	protein_coding
V	16756961	C	[T]	{C, T}	0.0175439	1	TRUE	FALSE	TRUE	0.0347772	57	0	1	56	T	missense_variant	MODERATE	dkf-2	WBGene00012019	transcript	T25E12.4f	protein_coding
V	16758034	C	[T]	{C, T}	0.0877193	1	TRUE	FALSE	TRUE	0.161466	57	0	5	52	T	missense_variant	MODERATE	dkf-2	WBGene00012019	transcript	T25E12.4f	protein_coding
V	16758168	A	[G]	{G, A}	0.0701754	1	TRUE	FALSE	TRUE	0.131657	57	0	4	53	G	missense_variant&splice_region_variant	MODERATE	dkf-2	WBGene00012019	transcript	T25E12.4f	protein_coding
V	16759118	A	[T, G]	{G, A, T}	0.105263	1	TRUE	FALSE	FALSE	0.190033	57	0	6	51	T	missense_variant	MODERATE	dkf-2	WBGene00012019	transcript	T25E12.4f	protein_coding	]]
V	16764261	A	[G]	{G, A}	0.0175439	1	TRUE	FALSE	TRUE	0.0347772	57	0	1	56	G	missense_variant	MODERATE	dkf-2	WBGene00012019	transcript	T25E12.4c	protein_coding
V	16764489	C	[T]	{C, T}	0.0701754	1	TRUE	FALSE	TRUE	0.131657	57	0	4	53	T	missense_variant	MODERATE	dkf-2	WBGene00012019	transcript	T25E12.4c	protein_coding
V	16766132	T	[A]	{A, T}	0.157895	1	TRUE	FALSE	FALSE	0.268281	57	0	9	48	A	missense_variant&splice_region_variant	MODERATE	dkf-2	WBGene00012019	transcript	T25E12.4f	protein_coding
V	16784959	C	[T]	{C, T}	0.157895	1	TRUE	FALSE	TRUE	0.268281	57	0	9	48	T	missense_variant	MODERATE	dkf-2	WBGene00012019	transcript	T25E12.4b	protein_coding
V	16789400	T	[A]	{A, T}	0.192982	1	TRUE	FALSE	FALSE	0.314237	57	0	11	46	A	missense_variant&splice_region_variant	MODERATE	immt-2	WBGene00012315	transcript	W06H3.1	protein_coding
V	16789703	C	[G]	{G, C}	0.0701754	1	TRUE	FALSE	FALSE	0.131657	57	0	4	53	G	missense_variant	MODERATE	immt-2	WBGene00012315	transcript	W06H3.1	protein_coding
V	16789708	C	[T]	{C, T}	0.157895	1	TRUE	FALSE	TRUE	0.268281	57	0	9	48	T	missense_variant	MODERATE	immt-2	WBGene00012315	transcript	W06H3.1	protein_coding
V	16789765	C	[T]	{C, T}	0.192982	1	TRUE	FALSE	TRUE	0.314237	57	0	11	46	T	missense_variant	MODERATE	immt-2	WBGene00012315	transcript	W06H3.1	protein_coding
V	16789813	A	[C]	{A, C}	0.0526316	1	TRUE	FALSE	FALSE	0.100605	57	0	3	54	C	missense_variant	MODERATE	immt-2	WBGene00012315	transcript	W06H3.1	protein_coding
V	16790215	A	[G]	{G, A}	0.350877	1	TRUE	FALSE	TRUE	0.459556	57	0	20	37	G	missense_variant	MODERATE	immt-2	WBGene00012315	transcript	W06H3.1	protein_coding
V	16790476	G	[A]	{G, A}	0.122807	1	TRUE	FALSE	TRUE	0.217358	57	0	7	50	A	missense_variant	MODERATE	immt-2	WBGene00012315	transcript	W06H3.1	protein_coding
V	16792083	G	[A]	{G, A}	0.473684	1	TRUE	FALSE	TRUE	0.503027	57	0	27	30	A	missense_variant	MODERATE	immt-2	WBGene00012315	transcript	W06H3.1	protein_coding
V	16792202	A	[G]	{G, A}	0.0526316	1	TRUE	FALSE	TRUE	0.100605	57	0	3	54	G	missense_variant	MODERATE	immt-2	WBGene00012315	transcript	W06H3.1	protein_coding
V	16792223	T	[C]	{C, T}	0.122807	1	TRUE	FALSE	TRUE	0.217358	57	0	7	50	C	missense_variant	MODERATE	immt-2	WBGene00012315	transcript	W06H3.1	protein_coding
V	16792371	C	[T]	{C, T}	0.0175439	1	TRUE	FALSE	TRUE	0.0347772	57	0	1	56	T	missense_variant	MODERATE	immt-2	WBGene00012315	transcript	W06H3.1	protein_coding
V	16792557	A	[G]	{G, A}	0.0175439	1	TRUE	FALSE	TRUE	0.0347772	57	0	1	56	G	missense_variant	MODERATE	immt-2	WBGene00012315	transcript	W06H3.1	protein_coding
V	16792869	G	[T]	{G, T}	0.122807	1	TRUE	FALSE	FALSE	0.217358	57	0	7	50	T	missense_variant	MODERATE	pus-1	WBGene00004248	transcript	W06H3.2a	protein_coding
V	16793841	C	[A]	{A, C}	0.0175439	1	TRUE	FALSE	FALSE	0.0347772	57	0	1	56	A	missense_variant	MODERATE	pus-1	WBGene00004248	transcript	W06H3.2a	protein_coding
V	16794942	G	[A]	{G, A}	0.0175439	1	TRUE	FALSE	TRUE	0.0347772	57	0	1	56	A	missense_variant	MODERATE	pus-1	WBGene00004248	transcript	W06H3.2a	protein_coding
V	16798093	C	[T]	{C, T}	0.0526316	1	TRUE	FALSE	TRUE	0.100605	57	0	3	54	T	missense_variant	MODERATE	ctps-1	WBGene00012316	transcript	W06H3.3	protein_coding
V	16800066	G	[A]	{G, A}	0.0350877	1	TRUE	FALSE	TRUE	0.0683124	57	0	2	55	A	missense_variant	MODERATE	ctps-1	WBGene00012316	transcript	W06H3.3	protein_coding
V	16801525	C	[A]	{A, C}	0.0526316	1	TRUE	FALSE	FALSE	0.100605	57	0	3	54	A	missense_variant	MODERATE	ctps-1	WBGene00012316	transcript	W06H3.3	protein_coding
V	16801667	T	[C]	{C, T}	0.0701754	1	TRUE	FALSE	TRUE	0.131657	57	0	4	53	C	missense_variant	MODERATE	ctps-1	WBGene00012316	transcript	W06H3.3	protein_coding
V	16805129	T	[C]	{C, T}	0.0175439	1	TRUE	FALSE	TRUE	0.0347772	57	0	1	56	C	missense_variant	MODERATE	cand-1	WBGene00013606	transcript	Y102A5A.1	protein_coding
V	16805330	G	[A]	{G, A}	0.0877193	1	TRUE	FALSE	TRUE	0.161466	57	0	5	52	A	missense_variant	MODERATE	cand-1	WBGene00013606	transcript	Y102A5A.1	protein_coding
V	16805550	T	[G]	{G, T}	0.0701754	1	TRUE	FALSE	FALSE	0.131657	57	0	4	53	G	missense_variant	MODERATE	cand-1	WBGene00013606	transcript	Y102A5A.1	protein_coding
V	16807151	A	[T]	{A, T}	0.0175439	1	TRUE	FALSE	FALSE	0.0347772	57	0	1	56	T	missense_variant	MODERATE	cand-1	WBGene00013606	transcript	Y102A5A.1	protein_coding
V	16810470	C	[G]	{G, C}	0.0701754	1	TRUE	FALSE	FALSE	0.131657	57	0	4	53	G	missense_variant	MODERATE	cand-1	WBGene00013606	transcript	Y102A5A.1	protein_coding
V	16811664	G	[A]	{G, A}	0.350877	1	TRUE	FALSE	TRUE	0.459556	57	0	20	37	A	missense_variant	MODERATE	cand-1	WBGene00013606	transcript	Y102A5A.1	protein_coding
V	16811719	C	[T]	{C, T}	0.473684	1	TRUE	FALSE	TRUE	0.503027	57	0	27	30	T	missense_variant	MODERATE	cand-1	WBGene00013606	transcript	Y102A5A.1	protein_coding
V	16815659	C	[T]	{C, T}	0.0701754	1	TRUE	FALSE	TRUE	0.131657	57	0	4	53	T	missense_variant&splice_region_variant	MODERATE	T20B3.1	WBGene00011850	transcript	T20B3.1	protein_coding
V	16815778	G	[A]	{G, A}	0.0526316	1	TRUE	FALSE	TRUE	0.100605	57	0	3	54	A	missense_variant	MODERATE	T20B3.1	WBGene00011850	transcript	T20B3.1	protein_coding
V	16817220	G	[A]	{G, A}	0.45614	1	TRUE	FALSE	TRUE	0.500543	57	0	26	31	A	missense_variant	MODERATE	T20B3.1	WBGene00011850	transcript	T20B3.1	protein_coding
V	16817222	C	[A]	{A, C}	0.0175439	1	TRUE	FALSE	FALSE	0.0347772	57	0	1	56	A	missense_variant	MODERATE	T20B3.1	WBGene00011850	transcript	T20B3.1	protein_coding
V	16817271	A	[C]	{A, C}	0.0701754	1	TRUE	FALSE	FALSE	0.131657	57	0	4	53	C	missense_variant	MODERATE	T20B3.1	WBGene00011850	transcript	T20B3.1	protein_coding
V	16817589	G	[T]	{G, T}	0.0175439	1	TRUE	FALSE	FALSE	0.0347772	57	0	1	56	T	missense_variant	MODERATE	T20B3.1	WBGene00011850	transcript	T20B3.1	protein_coding
V	16817706	A	[G]	{G, A}	0.0175439	1	TRUE	FALSE	TRUE	0.0347772	57	0	1	56	G	missense_variant	MODERATE	T20B3.1	WBGene00011850	transcript	T20B3.1	protein_coding
V	16817901	T	[C]	{C, T}	0.122807	1	TRUE	FALSE	TRUE	0.217358	57	0	7	50	C	missense_variant	MODERATE	T20B3.1	WBGene00011850	transcript	T20B3.1	protein_coding
V	16817953	A	[C]	{A, C}	0.122807	1	TRUE	FALSE	FALSE	0.217358	57	0	7	50	C	missense_variant	MODERATE	T20B3.1	WBGene00011850	transcript	T20B3.1	protein_coding
V	16818002	T	[C]	{C, T}	0.280702	1	TRUE	FALSE	TRUE	0.40739	57	0	16	41	C	missense_variant	MODERATE	T20B3.1	WBGene00011850	transcript	T20B3.1	protein_coding
V	16818159	A	[C]	{A, C}	0.0350877	1	TRUE	FALSE	FALSE	0.0683124	57	0	2	55	C	missense_variant	MODERATE	T20B3.1	WBGene00011850	transcript	T20B3.1	protein_coding
V	16818167	C	[T]	{C, T}	0.0175439	1	TRUE	FALSE	TRUE	0.0347772	57	0	1	56	T	missense_variant	MODERATE	T20B3.1	WBGene00011850	transcript	T20B3.1	protein_coding
V	16820340	T	[C]	{C, T}	0.0350877	1	TRUE	FALSE	TRUE	0.0683124	57	0	2	55	C	missense_variant	MODERATE	T20B3.1	WBGene00011850	transcript	T20B3.1	protein_coding
V	16826155	A	[G]	{G, A}	0.0175439	1	TRUE	FALSE	TRUE	0.0347772	57	0	1	56	G	missense_variant	MODERATE	srh-216	WBGene00005426	transcript	T20B3.5	protein_coding
V	16827300	C	[T]	{C, T}	0.0526316	1	TRUE	FALSE	TRUE	0.100605	57	0	3	54	T	missense_variant	MODERATE	srh-216	WBGene00005426	transcript	T20B3.5	protein_coding
V	16827339	T	[A]	{A, T}	0.350877	1	TRUE	FALSE	FALSE	0.459556	57	0	20	37	A	missense_variant	MODERATE	srh-216	WBGene00005426	transcript	T20B3.5	protein_coding
V	16827486	C	[A]	{A, C}	0.0526316	1	TRUE	FALSE	FALSE	0.100605	57	0	3	54	A	missense_variant	MODERATE	srh-216	WBGene00005426	transcript	T20B3.5	protein_coding
V	16827519	C	[G]	{G, C}	0.0175439	1	TRUE	FALSE	FALSE	0.0347772	57	0	1	56	G	missense_variant	MODERATE	srh-216	WBGene00005426	transcript	T20B3.5	protein_coding
V	16828597	C	[T]	{C, T}	0.0175439	1	TRUE	FALSE	TRUE	0.0347772	57	0	1	56	T	missense_variant	MODERATE	srh-214	WBGene00005424	transcript	T20B3.4	protein_coding
V	16829448	A	[T]	{A, T}	0.0175439	1	TRUE	FALSE	FALSE	0.0347772	57	0	1	56	T	missense_variant	MODERATE	srh-214	WBGene00005424	transcript	T20B3.4	protein_coding
V	16829541	A	[T]	{A, T}	0.0175439	1	TRUE	FALSE	FALSE	0.0347772	57	0	1	56	T	missense_variant	MODERATE	srh-214	WBGene00005424	transcript	T20B3.4	protein_coding
V	16829582	T	[A, G]	{A, T}	0.0175439	1	TRUE	FALSE	FALSE	0.0347772	57	0	1	56	A	missense_variant	MODERATE	srh-214	WBGene00005424	transcript	T20B3.4	protein_coding
V	16829584	A	[C]	{A, C}	0.0175439	1	TRUE	FALSE	FALSE	0.0347772	57	0	1	56	C	missense_variant	MODERATE	srh-214	WBGene00005424	transcript	T20B3.4	protein_coding
V	16830559	ACATATTCGT	[A]	{A, ACATATTCGT}	0.0438596	1	FALSE	TRUE	FALSE	0.0846142	57	1	2	54	A	conservative_inframe_deletion	MODERATE	srh-215	WBGene00005425	transcript	T20B3.3	protein_coding
V	16830899	A	[G]	{G, A}	0.0175439	1	TRUE	FALSE	TRUE	0.0347772	57	0	1	56	G	missense_variant	MODERATE	srh-215	WBGene00005425	transcript	T20B3.3	protein_coding
V	16833379	T	[C]	{C, T}	0.0178571	0.982456	TRUE	FALSE	TRUE	0.0353925	56	0	1	55	C	missense_variant	MODERATE	phy-3	WBGene00004026	transcript	T20B3.7	protein_coding
V	16833395	A	[G]	{G, A}	0.196429	0.982456	TRUE	FALSE	TRUE	0.318533	56	0	11	45	G	missense_variant	MODERATE	phy-3	WBGene00004026	transcript	T20B3.7	protein_coding
V	16833799	T	[C]	{C, T}	0.0175439	1	TRUE	FALSE	TRUE	0.0347772	57	0	1	56	C	missense_variant	MODERATE	tni-3	WBGene00006585	transcript	T20B3.2.1	protein_coding
V	16833803	C	[T]	{C, T}	0.0175439	1	TRUE	FALSE	TRUE	0.0347772	57	0	1	56	T	missense_variant	MODERATE	tni-3	WBGene00006585	transcript	T20B3.2.1	protein_coding
V	16833865	G	[T]	{G, T}	0.140351	1	TRUE	FALSE	FALSE	0.24344	57	0	8	49	T	missense_variant	MODERATE	tni-3	WBGene00006585	transcript	T20B3.2.1	protein_coding
V	16833878	G	[A]	{G, A}	0.0350877	1	TRUE	FALSE	TRUE	0.0683124	57	0	2	55	A	missense_variant	MODERATE	tni-3	WBGene00006585	transcript	T20B3.2.1	protein_coding
V	16833895	A	[T]	{A, T}	0.982456	1	TRUE	FALSE	FALSE	0.0347772	57	0	56	1	T	missense_variant	MODERATE	tni-3	WBGene00006585	transcript	T20B3.2.1	protein_coding
V	16837900	AGATTCG	[A]	{A, AGATTCG}	0.0175439	1	FALSE	TRUE	FALSE	0.0347772	57	0	1	56	A	conservative_inframe_deletion	MODERATE	phy-3	WBGene00004026	transcript	T20B3.7	protein_coding
V	16837901	GATTCGA	[G]	{G, GATTCGA}	0.0175439	1	FALSE	TRUE	FALSE	0.0347772	57	0	1	56	G	conservative_inframe_deletion	MODERATE	phy-3	WBGene00004026	transcript	T20B3.7	protein_coding
V	16838450	A	[G]	{G, A}	0.122807	1	TRUE	FALSE	TRUE	0.217358	57	0	7	50	G	missense_variant	MODERATE	phy-3	WBGene00004026	transcript	T20B3.7	protein_coding
V	16839001	C	[T]	{C, T}	0.0526316	1	TRUE	FALSE	TRUE	0.100605	57	0	3	54	T	missense_variant	MODERATE	phy-3	WBGene00004026	transcript	T20B3.7	protein_coding
V	16839246	C	[G]	{G, C}	0.0175439	1	TRUE	FALSE	FALSE	0.0347772	57	0	1	56	G	missense_variant	MODERATE	clec-40	WBGene00011853	transcript	T20B3.13	protein_coding
V	16839263	ACAGTTC	[A]	{A, ACAGTTC}	0.219298	1	FALSE	TRUE	FALSE	0.345443	57	1	12	44	A	disruptive_inframe_deletion	MODERATE	clec-40	WBGene00011853	transcript	T20B3.13	protein_coding
V	16839365	G	[C]	{G, C}	0.245614	1	TRUE	FALSE	FALSE	0.373855	57	0	14	43	C	missense_variant	MODERATE	clec-40	WBGene00011853	transcript	T20B3.13	protein_coding
V	16839411	C	[A]	{A, C}	0.245614	1	TRUE	FALSE	FALSE	0.373855	57	0	14	43	A	missense_variant	MODERATE	clec-40	WBGene00011853	transcript	T20B3.13	protein_coding
V	16839420	C	[T]	{C, T}	0.245614	1	TRUE	FALSE	TRUE	0.373855	57	0	14	43	T	missense_variant	MODERATE	clec-40	WBGene00011853	transcript	T20B3.13	protein_coding
V	16839431	T	[C]	{C, T}	0.245614	1	TRUE	FALSE	TRUE	0.373855	57	0	14	43	C	missense_variant	MODERATE	clec-40	WBGene00011853	transcript	T20B3.13	protein_coding
V	16839504	G	[T]	{G, T}	0.236842	1	TRUE	FALSE	FALSE	0.364695	57	1	13	43	T	missense_variant	MODERATE	clec-40	WBGene00011853	transcript	T20B3.13	protein_coding
V	16839508	C	[T, G]	{G, C, T}	0.429825	1	TRUE	FALSE	FALSE	0.494488	57	1	24	32	G	missense_variant	MODERATE	clec-40	WBGene00011853	transcript	T20B3.13	protein_coding
V	16839609	A	[C]	{A, C}	0.245614	1	TRUE	FALSE	FALSE	0.373855	57	0	14	43	C	missense_variant	MODERATE	clec-40	WBGene00011853	transcript	T20B3.13	protein_coding
V	16839657	C	[T, A]	{A, C}	0.210526	1	TRUE	FALSE	FALSE	0.335352	57	0	12	45	A	missense_variant	MODERATE	clec-40	WBGene00011853	transcript	T20B3.13	protein_coding
V	16839664	T	[G]	{G, T}	0.245614	1	TRUE	FALSE	FALSE	0.373855	57	0	14	43	G	missense_variant	MODERATE	clec-40	WBGene00011853	transcript	T20B3.13	protein_coding
V	16839810	A	[G]	{G, A}	0.0526316	1	TRUE	FALSE	TRUE	0.100605	57	0	3	54	G	missense_variant	MODERATE	clec-40	WBGene00011853	transcript	T20B3.13	protein_coding
V	16839888	T	[C]	{C, T}	0.245614	1	TRUE	FALSE	TRUE	0.373855	57	0	14	43	C	missense_variant	MODERATE	clec-40	WBGene00011853	transcript	T20B3.13	protein_coding
V	16839894	A	[G, C]	{A, C}	0.245614	1	TRUE	FALSE	FALSE	0.373855	57	0	14	43	C	missense_variant	MODERATE	clec-40	WBGene00011853	transcript	T20B3.13	protein_coding
V	16839915	T	[C]	{C, T}	0.245614	1	TRUE	FALSE	TRUE	0.373855	57	0	14	43	C	missense_variant	MODERATE	clec-40	WBGene00011853	transcript	T20B3.13	protein_coding
V	16839916	T	[G]	{G, T}	0.245614	1	TRUE	FALSE	FALSE	0.373855	57	0	14	43	G	missense_variant	MODERATE	clec-40	WBGene00011853	transcript	T20B3.13	protein_coding
V	16840088	C	[A]	{A, C}	0.438596	1	TRUE	FALSE	FALSE	0.496817	57	0	25	32	A	missense_variant&splice_region_variant	MODERATE	clec-40	WBGene00011853	transcript	T20B3.13	protein_coding
V	16840113	G	[C]	{G, C}	0.0877193	1	TRUE	FALSE	FALSE	0.161466	57	0	5	52	C	missense_variant	MODERATE	clec-40	WBGene00011853	transcript	T20B3.13	protein_coding
V	16840195	T	[C]	{C, T}	0.333333	1	TRUE	FALSE	TRUE	0.448378	57	0	19	38	C	missense_variant	MODERATE	clec-40	WBGene00011853	transcript	T20B3.13	protein_coding
V	16840225	C	[T]	{C, T}	0.245614	1	TRUE	FALSE	TRUE	0.373855	57	0	14	43	T	missense_variant	MODERATE	clec-40	WBGene00011853	transcript	T20B3.13	protein_coding
V	16840519	A	[G]	{G, A}	0.245614	1	TRUE	FALSE	TRUE	0.373855	57	0	14	43	G	missense_variant	MODERATE	clec-40	WBGene00011853	transcript	T20B3.13	protein_coding
V	16840525	T	[C]	{C, T}	0.245614	1	TRUE	FALSE	TRUE	0.373855	57	0	14	43	C	missense_variant	MODERATE	clec-40	WBGene00011853	transcript	T20B3.13	protein_coding
V	16840640	C	[G]	{G, C}	0.245614	1	TRUE	FALSE	FALSE	0.373855	57	0	14	43	G	missense_variant	MODERATE	clec-40	WBGene00011853	transcript	T20B3.13	protein_coding
V	16840648	A	[T]	{A, T}	0.0526316	1	TRUE	FALSE	FALSE	0.100605	57	0	3	54	T	missense_variant	MODERATE	clec-40	WBGene00011853	transcript	T20B3.13	protein_coding
V	16840672	T	[C]	{C, T}	0.245614	1	TRUE	FALSE	TRUE	0.373855	57	0	14	43	C	missense_variant	MODERATE	clec-40	WBGene00011853	transcript	T20B3.13	protein_coding
V	16840714	T	[C]	{C, T}	0.0175439	1	TRUE	FALSE	TRUE	0.0347772	57	0	1	56	C	missense_variant	MODERATE	clec-40	WBGene00011853	transcript	T20B3.13	protein_coding
V	16840793	C	[T]	{C, T}	0.245614	1	TRUE	FALSE	TRUE	0.373855	57	0	14	43	T	missense_variant	MODERATE	clec-40	WBGene00011853	transcript	T20B3.13	protein_coding
V	16840863	G	[A]	{G, A}	0.245614	1	TRUE	FALSE	TRUE	0.373855	57	0	14	43	A	missense_variant	MODERATE	clec-40	WBGene00011853	transcript	T20B3.13	protein_coding
V	16840868	G	[A]	{G, A}	0.0526316	1	TRUE	FALSE	TRUE	0.100605	57	0	3	54	A	missense_variant	MODERATE	clec-40	WBGene00011853	transcript	T20B3.13	protein_coding
V	16840869	T	[C]	{C, T}	0.245614	1	TRUE	FALSE	TRUE	0.373855	57	0	14	43	C	missense_variant	MODERATE	clec-40	WBGene00011853	transcript	T20B3.13	protein_coding
V	16840870	T	[G]	{G, T}	0.245614	1	TRUE	FALSE	FALSE	0.373855	57	0	14	43	G	missense_variant	MODERATE	clec-40	WBGene00011853	transcript	T20B3.13	protein_coding
V	16840892	A	[T]	{A, T}	0.245614	1	TRUE	FALSE	FALSE	0.373855	57	0	14	43	T	missense_variant	MODERATE	clec-40	WBGene00011853	transcript	T20B3.13	protein_coding
V	16841012	A	[G]	{G, A}	0.232143	0.982456	TRUE	FALSE	TRUE	0.359717	56	0	13	43	G	missense_variant&splice_region_variant	MODERATE	clec-40	WBGene00011853	transcript	T20B3.13	protein_coding
V	16841016	C	[T]	{C, T}	0.122807	1	TRUE	FALSE	TRUE	0.217358	57	0	7	50	T	missense_variant	MODERATE	clec-40	WBGene00011853	transcript	T20B3.13	protein_coding
V	16841037	A	[G]	{G, A}	0.22807	1	TRUE	FALSE	TRUE	0.355224	57	0	13	44	G	missense_variant	MODERATE	clec-40	WBGene00011853	transcript	T20B3.13	protein_coding
V	16841042	T	[C]	{C, T}	0.232143	0.982456	TRUE	FALSE	TRUE	0.359717	56	0	13	43	C	missense_variant	MODERATE	clec-40	WBGene00011853	transcript	T20B3.13	protein_coding
V	16841052	C	[T]	{C, T}	0.232143	0.982456	TRUE	FALSE	TRUE	0.359717	56	0	13	43	T	missense_variant	MODERATE	clec-40	WBGene00011853	transcript	T20B3.13	protein_coding
V	16843310	C	[T]	{C, T}	0.196429	0.982456	TRUE	FALSE	TRUE	0.318533	56	0	11	45	T	missense_variant	MODERATE	clec-25	WBGene00044331	transcript	T20B3.15	protein_coding
V	16843313	C	[T]	{C, T}	0.196429	0.982456	TRUE	FALSE	TRUE	0.318533	56	0	11	45	T	missense_variant	MODERATE	clec-25	WBGene00044331	transcript	T20B3.15	protein_coding
V	16843334	T	[G]	{G, T}	0.196429	0.982456	TRUE	FALSE	FALSE	0.318533	56	0	11	45	G	missense_variant	MODERATE	clec-25	WBGene00044331	transcript	T20B3.15	protein_coding
V	16843339	A	[G]	{G, A}	0.196429	0.982456	TRUE	FALSE	TRUE	0.318533	56	0	11	45	G	missense_variant	MODERATE	clec-25	WBGene00044331	transcript	T20B3.15	protein_coding
V	16843355	A	[C]	{A, C}	0.192982	1	TRUE	FALSE	FALSE	0.314237	57	0	11	46	C	missense_variant	MODERATE	clec-25	WBGene00044331	transcript	T20B3.15	protein_coding
V	16843376	G	[A, T]	{G, A}	0.192982	1	TRUE	FALSE	FALSE	0.314237	57	0	11	46	A	missense_variant	MODERATE	clec-25	WBGene00044331	transcript	T20B3.15	protein_coding
V	16843378	G	[C]	{G, C}	0.192982	1	TRUE	FALSE	FALSE	0.314237	57	0	11	46	C	missense_variant	MODERATE	clec-25	WBGene00044331	transcript	T20B3.15	protein_coding
V	16843379	T	[G]	{G, T}	0.0526316	1	TRUE	FALSE	FALSE	0.100605	57	0	3	54	G	missense_variant	MODERATE	clec-25	WBGene00044331	transcript	T20B3.15	protein_coding
V	16843610	A	[G]	{G, A}	0.22807	1	TRUE	FALSE	TRUE	0.355224	57	0	13	44	G	missense_variant	MODERATE	clec-25	WBGene00044331	transcript	T20B3.15	protein_coding
V	16843627	T	[C]	{C, T}	0.184211	1	TRUE	FALSE	TRUE	0.303214	57	5	8	44	C	missense_variant	MODERATE	clec-25	WBGene00044331	transcript	T20B3.15	protein_coding
V	16843635	G	[C]	{G, C}	0.22807	1	TRUE	FALSE	FALSE	0.355224	57	0	13	44	C	missense_variant	MODERATE	clec-25	WBGene00044331	transcript	T20B3.15	protein_coding
V	16843806	T	[G]	{G, T}	0.134615	0.912281	TRUE	FALSE	FALSE	0.23525	52	0	7	45	G	missense_variant	MODERATE	clec-25	WBGene00044331	transcript	T20B3.15	protein_coding
V	16843809	A	[C]	{A, C}	0.134615	0.912281	TRUE	FALSE	FALSE	0.23525	52	0	7	45	C	missense_variant	MODERATE	clec-25	WBGene00044331	transcript	T20B3.15	protein_coding
V	16843825	A	[G]	{G, A}	0.153846	0.912281	TRUE	FALSE	TRUE	0.262883	52	0	8	44	G	missense_variant	MODERATE	clec-25	WBGene00044331	transcript	T20B3.15	protein_coding
V	16843826	A	[G]	{G, A}	0.153846	0.912281	TRUE	FALSE	TRUE	0.262883	52	0	8	44	G	missense_variant	MODERATE	clec-25	WBGene00044331	transcript	T20B3.15	protein_coding
V	16843831	A	[T]	{A, T}	0.109091	0.964912	TRUE	FALSE	FALSE	0.196163	55	0	6	49	T	missense_variant	MODERATE	clec-25	WBGene00044331	transcript	T20B3.15	protein_coding
V	16843832	C	[T]	{C, T}	0.109091	0.964912	TRUE	FALSE	TRUE	0.196163	55	0	6	49	T	missense_variant	MODERATE	clec-25	WBGene00044331	transcript	T20B3.15	protein_coding
V	16843834	T	[A]	{A, T}	0.0909091	0.964912	TRUE	FALSE	FALSE	0.166806	55	0	5	50	A	missense_variant	MODERATE	clec-25	WBGene00044331	transcript	T20B3.15	protein_coding
V	16843843	C	[A]	{A, C}	0.236842	1	TRUE	FALSE	FALSE	0.364695	57	1	13	43	A	missense_variant	MODERATE	clec-25	WBGene00044331	transcript	T20B3.15	protein_coding
V	16843865	C	[A]	{A, C}	0.22807	1	TRUE	FALSE	FALSE	0.355224	57	0	13	44	A	missense_variant	MODERATE	clec-25	WBGene00044331	transcript	T20B3.15	protein_coding
V	16843868	G	[A]	{G, A}	0.22807	1	TRUE	FALSE	TRUE	0.355224	57	0	13	44	A	missense_variant	MODERATE	clec-25	WBGene00044331	transcript	T20B3.15	protein_coding
V	16843880	G	[C, A]	{G, A, C}	0.210526	1	TRUE	FALSE	FALSE	0.335352	57	0	12	45	A	missense_variant	MODERATE	clec-25	WBGene00044331	transcript	T20B3.15	protein_coding
V	16843887	A	[T]	{A, T}	0.263158	1	TRUE	FALSE	FALSE	0.391244	57	0	15	42	T	missense_variant	MODERATE	clec-25	WBGene00044331	transcript	T20B3.15	protein_coding
V	16843897	G	[A]	{G, A}	0.219298	1	TRUE	FALSE	TRUE	0.345443	57	1	12	44	A	missense_variant	MODERATE	clec-25	WBGene00044331	transcript	T20B3.15	protein_coding
V	16843906	A	[T, C]	{A, T}	0.22807	1	TRUE	FALSE	FALSE	0.355224	57	0	13	44	C	missense_variant	MODERATE	clec-25	WBGene00044331	transcript	T20B3.15	protein_coding
V	16843907	T	[A]	{A, T}	0.0350877	1	TRUE	FALSE	FALSE	0.0683124	57	2	1	54	A	missense_variant	MODERATE	clec-25	WBGene00044331	transcript	T20B3.15	protein_coding
V	16843924	C	[A]	{A, C}	0.0350877	1	TRUE	FALSE	FALSE	0.0683124	57	0	2	55	A	missense_variant	MODERATE	clec-25	WBGene00044331	transcript	T20B3.15	protein_coding
V	16843996	T	[A]	{A, T}	0.232143	0.982456	TRUE	FALSE	FALSE	0.359717	56	0	13	43	A	missense_variant&splice_region_variant	MODERATE	clec-25	WBGene00044331	transcript	T20B3.15	protein_coding
V	16844011	G	[C]	{G, C}	0.263158	1	TRUE	FALSE	FALSE	0.391244	57	0	15	42	C	missense_variant	MODERATE	clec-25	WBGene00044331	transcript	T20B3.15	protein_coding
V	16844018	G	[A, C]	{G, A, C}	0.245614	1	TRUE	FALSE	FALSE	0.373855	57	0	14	43	A	missense_variant	MODERATE	clec-25	WBGene00044331	transcript	T20B3.15	protein_coding
V	16844033	G	[A]	{G, A}	0.263158	1	TRUE	FALSE	TRUE	0.391244	57	0	15	42	A	missense_variant	MODERATE	clec-25	WBGene00044331	transcript	T20B3.15	protein_coding
V	16844034	T	[C]	{C, T}	0.0350877	1	TRUE	FALSE	TRUE	0.0683124	57	0	2	55	C	missense_variant	MODERATE	clec-25	WBGene00044331	transcript	T20B3.15	protein_coding
V	16844037	A	[G]	{G, A}	0.0175439	1	TRUE	FALSE	TRUE	0.0347772	57	0	1	56	G	missense_variant	MODERATE	clec-25	WBGene00044331	transcript	T20B3.15	protein_coding
V	16844039	A	[G]	{G, A}	0.0175439	1	TRUE	FALSE	TRUE	0.0347772	57	0	1	56	G	missense_variant	MODERATE	clec-25	WBGene00044331	transcript	T20B3.15	protein_coding
V	16844040	A	[G]	{G, A}	0.0175439	1	TRUE	FALSE	TRUE	0.0347772	57	0	1	56	G	missense_variant	MODERATE	clec-25	WBGene00044331	transcript	T20B3.15	protein_coding
V	16844041	C	[A]	{A, C}	0.245614	1	TRUE	FALSE	FALSE	0.373855	57	0	14	43	A	missense_variant	MODERATE	clec-25	WBGene00044331	transcript	T20B3.15	protein_coding
V	16844057	G	[T, A]	{G, A, T}	0.263158	1	TRUE	FALSE	FALSE	0.391244	57	0	15	42	A	missense_variant	MODERATE	clec-25	WBGene00044331	transcript	T20B3.15	protein_coding
V	16844063	G	[A]	{G, A}	0.245614	1	TRUE	FALSE	TRUE	0.373855	57	0	14	43	A	missense_variant	MODERATE	clec-25	WBGene00044331	transcript	T20B3.15	protein_coding
V	16844064	T	[A]	{A, T}	0.245614	1	TRUE	FALSE	FALSE	0.373855	57	0	14	43	A	missense_variant	MODERATE	clec-25	WBGene00044331	transcript	T20B3.15	protein_coding
V	16844082	C	[T]	{C, T}	0.263158	1	TRUE	FALSE	TRUE	0.391244	57	0	15	42	T	missense_variant	MODERATE	clec-25	WBGene00044331	transcript	T20B3.15	protein_coding
V	16844096	G	[A]	{G, A}	0.263158	1	TRUE	FALSE	TRUE	0.391244	57	0	15	42	A	missense_variant	MODERATE	clec-25	WBGene00044331	transcript	T20B3.15	protein_coding
V	16844111	A	[G]	{G, A}	0.245614	1	TRUE	FALSE	TRUE	0.373855	57	0	14	43	G	missense_variant	MODERATE	clec-25	WBGene00044331	transcript	T20B3.15	protein_coding
V	16844117	G	[A]	{G, A}	0.0175439	1	TRUE	FALSE	TRUE	0.0347772	57	0	1	56	A	missense_variant	MODERATE	clec-25	WBGene00044331	transcript	T20B3.15	protein_coding
V	16844124	G	[A]	{G, A}	0.0175439	1	TRUE	FALSE	TRUE	0.0347772	57	0	1	56	A	missense_variant	MODERATE	clec-25	WBGene00044331	transcript	T20B3.15	protein_coding
V	16844133	C	[T]	{C, T}	0.245614	1	TRUE	FALSE	TRUE	0.373855	57	0	14	43	T	missense_variant	MODERATE	clec-25	WBGene00044331	transcript	T20B3.15	protein_coding
V	16844197	C	[G, T]	{G, C}	0.22807	1	TRUE	FALSE	FALSE	0.355224	57	0	13	44	G	missense_variant	MODERATE	clec-25	WBGene00044331	transcript	T20B3.15	protein_coding
V	16844203	T	[G]	{G, T}	0.0877193	1	TRUE	FALSE	FALSE	0.161466	57	0	5	52	G	missense_variant	MODERATE	clec-25	WBGene00044331	transcript	T20B3.15	protein_coding
V	16844211	T	[A]	{A, T}	0.0175439	1	TRUE	FALSE	FALSE	0.0347772	57	0	1	56	A	missense_variant	MODERATE	clec-25	WBGene00044331	transcript	T20B3.15	protein_coding
V	16844255	G	[A]	{G, A}	0.0438596	1	TRUE	FALSE	TRUE	0.0846142	57	3	1	53	A	missense_variant	MODERATE	clec-25	WBGene00044331	transcript	T20B3.15	protein_coding
V	16844261	G	[A, T]	{G, A, T}	0.0263158	1	TRUE	FALSE	FALSE	0.0517	57	3	0	54	A	missense_variant	MODERATE	clec-25	WBGene00044331	transcript	T20B3.15	protein_coding
V	16844264	A	[T]	{A, T}	0.0175439	1	TRUE	FALSE	FALSE	0.0347772	57	0	1	56	T	missense_variant	MODERATE	clec-25	WBGene00044331	transcript	T20B3.15	protein_coding
V	16844288	G	[C, A, T]	{G, A}	0.219298	1	TRUE	FALSE	FALSE	0.345443	57	1	12	44	A	missense_variant	MODERATE	clec-25	WBGene00044331	transcript	T20B3.15	protein_coding
V	16844362	C	[A]	{A, C}	0.122807	1	TRUE	FALSE	FALSE	0.217358	57	0	7	50	A	missense_variant	MODERATE	clec-25	WBGene00044331	transcript	T20B3.15	protein_coding
V	16844403	G	[A]	{G, A}	0.0175439	1	TRUE	FALSE	TRUE	0.0347772	57	0	1	56	A	missense_variant	MODERATE	clec-25	WBGene00044331	transcript	T20B3.15	protein_coding
V	16844422	A	[G]	{G, A}	0.245614	1	TRUE	FALSE	TRUE	0.373855	57	0	14	43	G	missense_variant	MODERATE	clec-25	WBGene00044331	transcript	T20B3.15	protein_coding
V	16844455	C	[T, G]	{G, C, T}	0.245614	1	TRUE	FALSE	FALSE	0.373855	57	0	14	43	G	missense_variant	MODERATE	clec-25	WBGene00044331	transcript	T20B3.15	protein_coding
V	16844464	C	[T]	{C, T}	0.22807	1	TRUE	FALSE	TRUE	0.355224	57	0	13	44	T	missense_variant	MODERATE	clec-25	WBGene00044331	transcript	T20B3.15	protein_coding
V	16844472	C	[T]	{C, T}	0.0350877	1	TRUE	FALSE	TRUE	0.0683124	57	0	2	55	T	missense_variant	MODERATE	clec-25	WBGene00044331	transcript	T20B3.15	protein_coding
V	16844505	A	[T]	{A, T}	0.122807	1	TRUE	FALSE	FALSE	0.217358	57	0	7	50	T	missense_variant	MODERATE	clec-25	WBGene00044331	transcript	T20B3.15	protein_coding
V	16844508	G	[A]	{G, A}	0.0175439	1	TRUE	FALSE	TRUE	0.0347772	57	0	1	56	A	missense_variant	MODERATE	clec-25	WBGene00044331	transcript	T20B3.15	protein_coding
V	16844543	T	[A, C]	{A, T}	0.140351	1	TRUE	FALSE	FALSE	0.24344	57	0	8	49	A	missense_variant	MODERATE	clec-25	WBGene00044331	transcript	T20B3.15	protein_coding
V	16844565	C	[A, T]	{A, C, T}	0.00877193	1	TRUE	FALSE	FALSE	0.0175439	57	1	0	56	A	missense_variant	MODERATE	clec-25	WBGene00044331	transcript	T20B3.15	protein_coding
V	16844586	A	[G]	{G, A}	0.223214	0.982456	TRUE	FALSE	TRUE	0.349903	56	1	12	43	G	missense_variant	MODERATE	clec-25	WBGene00044331	transcript	T20B3.15	protein_coding
V	16844602	G	[A]	{G, A}	0.232143	0.982456	TRUE	FALSE	TRUE	0.359717	56	0	13	43	A	missense_variant	MODERATE	clec-25	WBGene00044331	transcript	T20B3.15	protein_coding
V	16844609	C	[T, A]	{C, T}	0.232143	0.982456	TRUE	FALSE	FALSE	0.359717	56	0	13	43	A	missense_variant	MODERATE	clec-25	WBGene00044331	transcript	T20B3.15	protein_coding
V	16844640	A	[G]	{G, A}	0.350877	1	TRUE	FALSE	TRUE	0.459556	57	0	20	37	G	missense_variant	MODERATE	clec-25	WBGene00044331	transcript	T20B3.15	protein_coding
V	16844641	C	[G, A]	{G, A, C}	0.245614	1	TRUE	FALSE	FALSE	0.373855	57	0	14	43	A	missense_variant	MODERATE	clec-25	WBGene00044331	transcript	T20B3.15	protein_coding
V	16844682	C	[T]	{C, T}	0.0175439	1	TRUE	FALSE	TRUE	0.0347772	57	0	1	56	T	missense_variant	MODERATE	clec-25	WBGene00044331	transcript	T20B3.15	protein_coding
V	16846870	G	[T]	{G, T}	0.0350877	1	TRUE	FALSE	FALSE	0.0683124	57	0	2	55	T	missense_variant	MODERATE	clec-36	WBGene00044332	transcript	T20B3.16	protein_coding
V	16846874	A	[T]	{A, T}	0.0175439	1	TRUE	FALSE	FALSE	0.0347772	57	0	1	56	T	missense_variant	MODERATE	clec-36	WBGene00044332	transcript	T20B3.16	protein_coding
V	16846935	T	[C]	{C, T}	0.122807	1	TRUE	FALSE	TRUE	0.217358	57	4	5	48	C	missense_variant	MODERATE	clec-36	WBGene00044332	transcript	T20B3.16	protein_coding
V	16846964	A	[C, T]	{A, C}	0.140351	1	TRUE	FALSE	FALSE	0.24344	57	4	6	47	C	missense_variant	MODERATE	clec-36	WBGene00044332	transcript	T20B3.16	protein_coding
V	16846965	G	[T]	{G, T}	0.140351	1	TRUE	FALSE	FALSE	0.24344	57	4	6	47	T	missense_variant	MODERATE	clec-36	WBGene00044332	transcript	T20B3.16	protein_coding
V	16846970	T	[A, G]	{G, A, T}	0.131579	1	TRUE	FALSE	FALSE	0.230554	57	3	6	48	A	missense_variant	MODERATE	clec-36	WBGene00044332	transcript	T20B3.16	protein_coding
V	16846971	C	[T]	{C, T}	0.131579	1	TRUE	FALSE	TRUE	0.230554	57	3	6	48	T	missense_variant	MODERATE	clec-36	WBGene00044332	transcript	T20B3.16	protein_coding
V	16846982	C	[T]	{C, T}	0.131579	1	TRUE	FALSE	TRUE	0.230554	57	3	6	48	T	missense_variant	MODERATE	clec-36	WBGene00044332	transcript	T20B3.16	protein_coding
V	16847018	G	[A]	{G, A}	0.0789474	1	TRUE	FALSE	TRUE	0.146716	57	7	1	49	A	missense_variant	MODERATE	clec-36	WBGene00044332	transcript	T20B3.16	protein_coding
V	16847019	T	[G]	{G, T}	0.114035	1	TRUE	FALSE	FALSE	0.20385	57	3	5	49	G	missense_variant	MODERATE	clec-36	WBGene00044332	transcript	T20B3.16	protein_coding
V	16847052	C	[T]	{C, T}	0.131579	1	TRUE	FALSE	TRUE	0.230554	57	3	6	48	T	missense_variant	MODERATE	clec-36	WBGene00044332	transcript	T20B3.16	protein_coding
V	16847109	C	[T]	{C, T}	0.122807	1	TRUE	FALSE	TRUE	0.217358	57	4	5	48	T	missense_variant	MODERATE	clec-36	WBGene00044332	transcript	T20B3.16	protein_coding
V	16847127	C	[G]	{G, C}	0.0614035	1	TRUE	FALSE	FALSE	0.116286	57	3	2	52	G	missense_variant	MODERATE	clec-36	WBGene00044332	transcript	T20B3.16	protein_coding
V	16847130	A	[T]	{A, T}	0.0438596	1	TRUE	FALSE	FALSE	0.0846142	57	3	1	53	T	missense_variant	MODERATE	clec-36	WBGene00044332	transcript	T20B3.16	protein_coding
V	16847179	A	[T]	{A, T}	0.0789474	1	TRUE	FALSE	FALSE	0.146716	57	3	3	51	T	missense_variant	MODERATE	clec-36	WBGene00044332	transcript	T20B3.16	protein_coding
V	16847211	A	[T]	{A, T}	0.105263	1	TRUE	FALSE	FALSE	0.190033	57	2	5	50	T	missense_variant	MODERATE	clec-36	WBGene00044332	transcript	T20B3.16	protein_coding
V	16847239	G	[T]	{G, T}	0.0438596	1	TRUE	FALSE	FALSE	0.0846142	57	3	1	53	T	missense_variant	MODERATE	clec-36	WBGene00044332	transcript	T20B3.16	protein_coding
V	16847244	A	[C]	{A, C}	0.131579	1	TRUE	FALSE	FALSE	0.230554	57	3	6	48	C	missense_variant	MODERATE	clec-36	WBGene00044332	transcript	T20B3.16	protein_coding
V	16847251	G	[T]	{G, T}	0.131579	1	TRUE	FALSE	FALSE	0.230554	57	3	6	48	T	missense_variant	MODERATE	clec-36	WBGene00044332	transcript	T20B3.16	protein_coding
V	16847327	G	[A, T]	{G, A, T}	0.0789474	1	TRUE	FALSE	FALSE	0.146716	57	3	3	51	T	missense_variant	MODERATE	clec-36	WBGene00044332	transcript	T20B3.16	protein_coding
V	16847344	T	[C]	{C, T}	0.0535714	0.982456	TRUE	FALSE	TRUE	0.102317	56	2	2	52	C	missense_variant	MODERATE	clec-36	WBGene00044332	transcript	T20B3.16	protein_coding
V	16847350	A	[G]	{G, A}	0.116071	0.982456	TRUE	FALSE	TRUE	0.207046	56	3	5	48	G	missense_variant	MODERATE	clec-36	WBGene00044332	transcript	T20B3.16	protein_coding
V	16847352	C	[T]	{C, T}	0.0535714	0.982456	TRUE	FALSE	TRUE	0.102317	56	2	2	52	T	missense_variant	MODERATE	clec-36	WBGene00044332	transcript	T20B3.16	protein_coding
V	16847370	A	[G]	{G, A}	0.107143	0.982456	TRUE	FALSE	TRUE	0.19305	56	2	5	49	G	missense_variant	MODERATE	clec-36	WBGene00044332	transcript	T20B3.16	protein_coding
V	16847371	C	[T]	{C, T}	0.0357143	0.982456	TRUE	FALSE	TRUE	0.0694981	56	0	2	54	T	missense_variant	MODERATE	clec-36	WBGene00044332	transcript	T20B3.16	protein_coding
V	16847373	C	[T]	{C, T}	0.0714286	0.982456	TRUE	FALSE	TRUE	0.133848	56	2	3	51	T	missense_variant	MODERATE	clec-36	WBGene00044332	transcript	T20B3.16	protein_coding
V	16847376	G	[A, C]	{G, A, C}	0.0892857	0.982456	TRUE	FALSE	FALSE	0.164093	56	4	3	49	A	missense_variant	MODERATE	clec-36	WBGene00044332	transcript	T20B3.16	protein_coding
V	16847377	A	[T, G]	{A, T}	0.107143	0.982456	TRUE	FALSE	FALSE	0.19305	56	2	5	49	G	missense_variant	MODERATE	clec-36	WBGene00044332	transcript	T20B3.16	protein_coding
V	16847413	T	[C]	{C, T}	0.0625	0.982456	TRUE	FALSE	TRUE	0.118243	56	3	2	51	C	missense_variant	MODERATE	clec-36	WBGene00044332	transcript	T20B3.16	protein_coding
V	16847427	C	[T]	{C, T}	0.0446429	0.982456	TRUE	FALSE	TRUE	0.0860682	56	1	2	53	T	missense_variant&splice_region_variant	MODERATE	clec-36	WBGene00044332	transcript	T20B3.16	protein_coding
V	16847498	G	[T]	{G, T}	0.0625	0.982456	TRUE	FALSE	FALSE	0.118243	56	3	2	51	T	missense_variant&splice_region_variant	MODERATE	clec-36	WBGene00044332	transcript	T20B3.16	protein_coding
V	16847499	G	[C]	{G, C}	0.0625	0.982456	TRUE	FALSE	FALSE	0.118243	56	3	2	51	C	missense_variant	MODERATE	clec-36	WBGene00044332	transcript	T20B3.16	protein_coding
V	16847625	C	[T]	{C, T}	0.0625	0.982456	TRUE	FALSE	TRUE	0.118243	56	3	2	51	T	missense_variant	MODERATE	clec-36	WBGene00044332	transcript	T20B3.16	protein_coding
V	16847628	G	[T]	{G, T}	0.0625	0.982456	TRUE	FALSE	FALSE	0.118243	56	3	2	51	T	missense_variant	MODERATE	clec-36	WBGene00044332	transcript	T20B3.16	protein_coding
V	16847689	T	[C]	{C, T}	0.125	0.982456	TRUE	FALSE	TRUE	0.220721	56	0	7	49	C	missense_variant	MODERATE	clec-36	WBGene00044332	transcript	T20B3.16	protein_coding
V	16847698	T	[A]	{A, T}	0.116071	0.982456	TRUE	FALSE	FALSE	0.207046	56	3	5	48	A	missense_variant	MODERATE	clec-36	WBGene00044332	transcript	T20B3.16	protein_coding
V	16847717	T	[A]	{A, T}	0.116071	0.982456	TRUE	FALSE	FALSE	0.207046	56	3	5	48	A	missense_variant	MODERATE	clec-36	WBGene00044332	transcript	T20B3.16	protein_coding
V	16847719	T	[G]	{G, T}	0.0357143	0.982456	TRUE	FALSE	FALSE	0.0694981	56	0	2	54	G	missense_variant	MODERATE	clec-36	WBGene00044332	transcript	T20B3.16	protein_coding
V	16847721	C	[A, T]	{A, C, T}	0.0982143	0.982456	TRUE	FALSE	FALSE	0.178732	56	5	3	48	A	missense_variant	MODERATE	clec-36	WBGene00044332	transcript	T20B3.16	protein_coding
V	16847733	T	[A]	{A, T}	0.0625	0.982456	TRUE	FALSE	FALSE	0.118243	56	3	2	51	A	missense_variant	MODERATE	clec-36	WBGene00044332	transcript	T20B3.16	protein_coding
V	16847739	A	[G]	{G, A}	0.116071	0.982456	TRUE	FALSE	TRUE	0.207046	56	3	5	48	G	missense_variant	MODERATE	clec-36	WBGene00044332	transcript	T20B3.16	protein_coding
V	16847745	G	[A]	{G, A}	0.0625	0.982456	TRUE	FALSE	TRUE	0.118243	56	3	2	51	A	missense_variant	MODERATE	clec-36	WBGene00044332	transcript	T20B3.16	protein_coding
V	16847808	G	[A, T]	{G, A}	0.0964912	1	TRUE	FALSE	FALSE	0.175904	57	1	5	51	A	missense_variant	MODERATE	clec-36	WBGene00044332	transcript	T20B3.16	protein_coding
V	16848034	T	[A]	{A, T}	0.0714286	0.982456	TRUE	FALSE	FALSE	0.133848	56	2	3	51	A	missense_variant&splice_region_variant	MODERATE	clec-36	WBGene00044332	transcript	T20B3.16	protein_coding
V	16848047	G	[A]	{G, A}	0.0614035	1	TRUE	FALSE	TRUE	0.116286	57	3	2	52	A	missense_variant	MODERATE	clec-36	WBGene00044332	transcript	T20B3.16	protein_coding
V	16848071	G	[T]	{G, T}	0.0614035	1	TRUE	FALSE	FALSE	0.116286	57	3	2	52	T	missense_variant	MODERATE	clec-36	WBGene00044332	transcript	T20B3.16	protein_coding
V	16848174	A	[G]	{G, A}	0.0614035	1	TRUE	FALSE	TRUE	0.116286	57	3	2	52	G	missense_variant	MODERATE	clec-36	WBGene00044332	transcript	T20B3.16	protein_coding
V	16848191	T	[A]	{A, T}	0.114035	1	TRUE	FALSE	FALSE	0.20385	57	3	5	49	A	missense_variant	MODERATE	clec-36	WBGene00044332	transcript	T20B3.16	protein_coding
V	16848236	T	[G]	{G, T}	0.114035	1	TRUE	FALSE	FALSE	0.20385	57	3	5	49	G	missense_variant	MODERATE	clec-36	WBGene00044332	transcript	T20B3.16	protein_coding
V	16848353	A	[C]	{A, C}	0.151786	0.982456	TRUE	FALSE	FALSE	0.259813	56	3	7	46	C	missense_variant	MODERATE	clec-36	WBGene00044332	transcript	T20B3.16	protein_coding
V	16848406	G	[T]	{G, T}	0.0803571	0.982456	TRUE	FALSE	FALSE	0.149131	56	3	3	50	T	missense_variant	MODERATE	clec-36	WBGene00044332	transcript	T20B3.16	protein_coding
V	16848415	T	[A]	{A, T}	0.0803571	0.982456	TRUE	FALSE	FALSE	0.149131	56	3	3	50	A	missense_variant	MODERATE	clec-36	WBGene00044332	transcript	T20B3.16	protein_coding
V	16848442	T	[C, A]	{C, T}	0.0803571	0.982456	TRUE	FALSE	FALSE	0.149131	56	3	3	50	A	missense_variant	MODERATE	clec-36	WBGene00044332	transcript	T20B3.16	protein_coding
V	16848446	T	[G]	{G, T}	0.105263	1	TRUE	FALSE	FALSE	0.190033	57	4	4	49	G	missense_variant	MODERATE	clec-36	WBGene00044332	transcript	T20B3.16	protein_coding
V	16848754	G	[T]	{G, T}	0.236842	1	TRUE	FALSE	FALSE	0.364695	57	3	12	42	T	missense_variant	MODERATE	clec-26	WBGene00011852	transcript	T20B3.12	protein_coding
V	16848758	T	[C]	{C, T}	0.236842	1	TRUE	FALSE	TRUE	0.364695	57	3	12	42	C	missense_variant	MODERATE	clec-26	WBGene00011852	transcript	T20B3.12	protein_coding
V	16848806	C	[T]	{C, T}	0.0350877	1	TRUE	FALSE	TRUE	0.0683124	57	0	2	55	T	missense_variant	MODERATE	clec-26	WBGene00011852	transcript	T20B3.12	protein_coding
V	16848858	C	[T]	{C, T}	0.184211	1	TRUE	FALSE	TRUE	0.303214	57	3	9	45	T	missense_variant	MODERATE	clec-26	WBGene00011852	transcript	T20B3.12	protein_coding
V	16848878	C	[T]	{C, T}	0.0803571	0.982456	TRUE	FALSE	TRUE	0.149131	56	3	3	50	T	missense_variant	MODERATE	clec-26	WBGene00011852	transcript	T20B3.12	protein_coding
V	16848969	C	[T]	{C, T}	0.1875	0.982456	TRUE	FALSE	TRUE	0.307432	56	3	9	44	T	missense_variant&splice_region_variant	MODERATE	clec-26	WBGene00011852	transcript	T20B3.12	protein_coding
V	16848977	A	[C]	{A, C}	0.1875	0.982456	TRUE	FALSE	FALSE	0.307432	56	3	9	44	C	missense_variant	MODERATE	clec-26	WBGene00011852	transcript	T20B3.12	protein_coding
V	16848992	G	[C]	{G, C}	0.241071	0.982456	TRUE	FALSE	FALSE	0.369208	56	3	12	41	C	missense_variant	MODERATE	clec-26	WBGene00011852	transcript	T20B3.12	protein_coding
V	16849004	T	[A]	{A, T}	0.1875	0.982456	TRUE	FALSE	FALSE	0.307432	56	3	9	44	A	missense_variant	MODERATE	clec-26	WBGene00011852	transcript	T20B3.12	protein_coding
V	16849225	C	[A]	{A, C}	0.219298	1	TRUE	FALSE	FALSE	0.345443	57	1	12	44	A	missense_variant	MODERATE	clec-26	WBGene00011852	transcript	T20B3.12	protein_coding
V	16849231	A	[G]	{G, A}	0.219298	1	TRUE	FALSE	TRUE	0.345443	57	1	12	44	G	missense_variant	MODERATE	clec-26	WBGene00011852	transcript	T20B3.12	protein_coding
V	16849270	A	[C]	{A, C}	0.175439	1	TRUE	FALSE	FALSE	0.29188	57	2	9	46	C	missense_variant	MODERATE	clec-26	WBGene00011852	transcript	T20B3.12	protein_coding
V	16849271	A	[G]	{G, A}	0.210526	1	TRUE	FALSE	TRUE	0.335352	57	0	12	45	G	missense_variant	MODERATE	clec-26	WBGene00011852	transcript	T20B3.12	protein_coding
V	16849276	G	[T, A]	{G, T}	0.175439	1	TRUE	FALSE	FALSE	0.29188	57	2	9	46	A	missense_variant	MODERATE	clec-26	WBGene00011852	transcript	T20B3.12	protein_coding
V	16849324	T	[A]	{A, T}	0.184211	1	TRUE	FALSE	FALSE	0.303214	57	3	9	45	A	missense_variant	MODERATE	clec-26	WBGene00011852	transcript	T20B3.12	protein_coding
V	16849431	G	[T]	{G, T}	0.0175439	1	TRUE	FALSE	FALSE	0.0347772	57	0	1	56	T	missense_variant	MODERATE	clec-26	WBGene00011852	transcript	T20B3.12	protein_coding
V	16849462	A	[G]	{G, A}	0.184211	1	TRUE	FALSE	TRUE	0.303214	57	3	9	45	G	missense_variant	MODERATE	clec-26	WBGene00011852	transcript	T20B3.12	protein_coding
V	16849465	G	[A]	{G, A}	0.0175439	1	TRUE	FALSE	TRUE	0.0347772	57	0	1	56	A	missense_variant	MODERATE	clec-26	WBGene00011852	transcript	T20B3.12	protein_coding
V	16849510	G	[A]	{G, A}	0.184211	1	TRUE	FALSE	TRUE	0.303214	57	3	9	45	A	missense_variant	MODERATE	clec-26	WBGene00011852	transcript	T20B3.12	protein_coding
V	16849513	T	[C]	{C, T}	0.0175439	1	TRUE	FALSE	TRUE	0.0347772	57	0	1	56	C	missense_variant	MODERATE	clec-26	WBGene00011852	transcript	T20B3.12	protein_coding
V	16849526	C	[A]	{A, C}	0.0175439	1	TRUE	FALSE	FALSE	0.0347772	57	0	1	56	A	missense_variant	MODERATE	clec-26	WBGene00011852	transcript	T20B3.12	protein_coding
V	16849531	G	[C]	{G, C}	0.184211	1	TRUE	FALSE	FALSE	0.303214	57	3	9	45	C	missense_variant&splice_region_variant	MODERATE	clec-26	WBGene00011852	transcript	T20B3.12	protein_coding
V	16849587	G	[A]	{G, A}	0.0175439	1	TRUE	FALSE	TRUE	0.0347772	57	0	1	56	A	missense_variant	MODERATE	clec-26	WBGene00011852	transcript	T20B3.12	protein_coding
V	16849596	A	[G]	{G, A}	0.438596	1	TRUE	FALSE	TRUE	0.496817	57	0	25	32	G	missense_variant	MODERATE	clec-26	WBGene00011852	transcript	T20B3.12	protein_coding
V	16849604	A	[G]	{G, A}	0.0175439	1	TRUE	FALSE	TRUE	0.0347772	57	0	1	56	G	missense_variant	MODERATE	clec-26	WBGene00011852	transcript	T20B3.12	protein_coding
V	16849623	G	[C, A]	{G, C}	0.0175439	1	TRUE	FALSE	FALSE	0.0347772	57	0	1	56	A	missense_variant	MODERATE	clec-26	WBGene00011852	transcript	T20B3.12	protein_coding
V	16849625	A	[C, G]	{G, A}	0.0175439	1	TRUE	FALSE	FALSE	0.0347772	57	0	1	56	C	missense_variant	MODERATE	clec-26	WBGene00011852	transcript	T20B3.12	protein_coding
V	16849632	C	[T]	{C, T}	0.0175439	1	TRUE	FALSE	TRUE	0.0347772	57	0	1	56	T	missense_variant	MODERATE	clec-26	WBGene00011852	transcript	T20B3.12	protein_coding
V	16849635	G	[A]	{G, A}	0.0175439	1	TRUE	FALSE	TRUE	0.0347772	57	0	1	56	A	missense_variant	MODERATE	clec-26	WBGene00011852	transcript	T20B3.12	protein_coding
V	16849653	T	[C]	{C, T}	0.236842	1	TRUE	FALSE	TRUE	0.364695	57	3	12	42	C	missense_variant	MODERATE	clec-26	WBGene00011852	transcript	T20B3.12	protein_coding
V	16849654	G	[C, A]	{G, C}	0.184211	1	TRUE	FALSE	FALSE	0.303214	57	3	9	45	C	missense_variant	MODERATE	clec-26	WBGene00011852	transcript	T20B3.12	protein_coding
V	16849662	A	[T]	{A, T}	0.184211	1	TRUE	FALSE	FALSE	0.303214	57	3	9	45	T	missense_variant	MODERATE	clec-26	WBGene00011852	transcript	T20B3.12	protein_coding
V	16849789	T	[C]	{C, T}	0.0614035	1	TRUE	FALSE	TRUE	0.116286	57	3	2	52	C	missense_variant	MODERATE	clec-26	WBGene00011852	transcript	T20B3.12	protein_coding
V	16849819	A	[T]	{A, T}	0.0175439	1	TRUE	FALSE	FALSE	0.0347772	57	0	1	56	T	missense_variant	MODERATE	clec-26	WBGene00011852	transcript	T20B3.12	protein_coding
V	16849853	T	[C]	{C, T}	0.105263	1	TRUE	FALSE	TRUE	0.190033	57	0	6	51	C	missense_variant	MODERATE	clec-26	WBGene00011852	transcript	T20B3.12	protein_coding
V	16849921	A	[G]	{G, A}	0.210526	1	TRUE	FALSE	TRUE	0.335352	57	0	12	45	G	missense_variant	MODERATE	clec-26	WBGene00011852	transcript	T20B3.12	protein_coding
V	16849990	G	[C]	{G, C}	0.0877193	1	TRUE	FALSE	FALSE	0.161466	57	0	5	52	C	missense_variant	MODERATE	clec-26	WBGene00011852	transcript	T20B3.12	protein_coding
V	16849991	A	[C]	{A, C}	0.0877193	1	TRUE	FALSE	FALSE	0.161466	57	0	5	52	C	missense_variant	MODERATE	clec-26	WBGene00011852	transcript	T20B3.12	protein_coding
V	16849993	T	[A]	{A, T}	0.114035	1	TRUE	FALSE	FALSE	0.20385	57	3	5	49	A	missense_variant	MODERATE	clec-26	WBGene00011852	transcript	T20B3.12	protein_coding
V	16850018	T	[C]	{C, T}	0.245614	1	TRUE	FALSE	TRUE	0.373855	57	2	13	42	C	missense_variant	MODERATE	clec-26	WBGene00011852	transcript	T20B3.12	protein_coding
V	16850021	A	[C]	{A, C}	0.245614	1	TRUE	FALSE	FALSE	0.373855	57	2	13	42	C	missense_variant	MODERATE	clec-26	WBGene00011852	transcript	T20B3.12	protein_coding
V	16850038	A	[T, C]	{A, C, T}	0.254386	1	TRUE	FALSE	FALSE	0.382705	57	3	13	41	C	missense_variant	MODERATE	clec-26	WBGene00011852	transcript	T20B3.12	protein_coding
V	16850039	A	[T]	{A, T}	0.0175439	1	TRUE	FALSE	FALSE	0.0347772	57	0	1	56	T	missense_variant	MODERATE	clec-26	WBGene00011852	transcript	T20B3.12	protein_coding
V	16850043	G	[T]	{G, T}	0.254386	1	TRUE	FALSE	FALSE	0.382705	57	3	13	41	T	missense_variant	MODERATE	clec-26	WBGene00011852	transcript	T20B3.12	protein_coding
V	16850071	G	[A]	{G, A}	0.0964912	1	TRUE	FALSE	TRUE	0.175904	57	3	4	50	A	missense_variant	MODERATE	clec-26	WBGene00011852	transcript	T20B3.12	protein_coding
V	16850083	G	[A]	{G, A}	0.0175439	1	TRUE	FALSE	TRUE	0.0347772	57	0	1	56	A	missense_variant	MODERATE	clec-26	WBGene00011852	transcript	T20B3.12	protein_coding
V	16850087	G	[C]	{G, C}	0.0877193	1	TRUE	FALSE	FALSE	0.161466	57	0	5	52	C	missense_variant	MODERATE	clec-26	WBGene00011852	transcript	T20B3.12	protein_coding
V	16850092	A	[G]	{G, A}	0.0964912	1	TRUE	FALSE	TRUE	0.175904	57	3	4	50	G	missense_variant	MODERATE	clec-26	WBGene00011852	transcript	T20B3.12	protein_coding
V	16850120	T	[C, A]	{C, T}	0.214286	0.982456	TRUE	FALSE	FALSE	0.339768	56	0	12	44	A	missense_variant	MODERATE	clec-26	WBGene00011852	transcript	T20B3.12	protein_coding
V	16850479	A	[T]	{A, T}	0.142857	0.982456	TRUE	FALSE	FALSE	0.247104	56	0	8	48	T	missense_variant	MODERATE	clec-37	WBGene00013609	transcript	Y102A5B.3	protein_coding
V	16850485	C	[T]	{C, T}	0.0178571	0.982456	TRUE	FALSE	TRUE	0.0353925	56	0	1	55	T	missense_variant	MODERATE	clec-37	WBGene00013609	transcript	Y102A5B.3	protein_coding
V	16850490	G	[C]	{G, C}	0.0982143	0.982456	TRUE	FALSE	FALSE	0.178732	56	3	4	49	C	missense_variant	MODERATE	clec-37	WBGene00013609	transcript	Y102A5B.3	protein_coding
V	16850493	G	[C]	{G, C}	0.0178571	0.982456	TRUE	FALSE	FALSE	0.0353925	56	0	1	55	C	missense_variant	MODERATE	clec-37	WBGene00013609	transcript	Y102A5B.3	protein_coding
V	16850511	A	[T]	{A, T}	0.157895	1	TRUE	FALSE	FALSE	0.268281	57	2	8	47	T	missense_variant	MODERATE	clec-37	WBGene00013609	transcript	Y102A5B.3	protein_coding
V	16850532	C	[A]	{A, C}	0.0350877	1	TRUE	FALSE	FALSE	0.0683124	57	0	2	55	A	missense_variant	MODERATE	clec-37	WBGene00013609	transcript	Y102A5B.3	protein_coding
V	16850541	T	[G]	{G, T}	0.114035	1	TRUE	FALSE	FALSE	0.20385	57	3	5	49	G	missense_variant	MODERATE	clec-37	WBGene00013609	transcript	Y102A5B.3	protein_coding
V	16850544	T	[A]	{A, T}	0.114035	1	TRUE	FALSE	FALSE	0.20385	57	3	5	49	A	missense_variant	MODERATE	clec-37	WBGene00013609	transcript	Y102A5B.3	protein_coding
V	16850545	C	[T]	{C, T}	0.114035	1	TRUE	FALSE	TRUE	0.20385	57	3	5	49	T	missense_variant	MODERATE	clec-37	WBGene00013609	transcript	Y102A5B.3	protein_coding
V	16850551	T	[A]	{A, T}	0.0964912	1	TRUE	FALSE	FALSE	0.175904	57	3	4	50	A	missense_variant	MODERATE	clec-37	WBGene00013609	transcript	Y102A5B.3	protein_coding
V	16850553	C	[G]	{G, C}	0.0175439	1	TRUE	FALSE	FALSE	0.0347772	57	0	1	56	G	missense_variant	MODERATE	clec-37	WBGene00013609	transcript	Y102A5B.3	protein_coding
V	16850554	C	[A]	{A, C}	0.114035	1	TRUE	FALSE	FALSE	0.20385	57	3	5	49	A	missense_variant	MODERATE	clec-37	WBGene00013609	transcript	Y102A5B.3	protein_coding
V	16850561	T	[C]	{C, T}	0.201754	1	TRUE	FALSE	TRUE	0.32495	57	3	10	44	C	missense_variant	MODERATE	clec-37	WBGene00013609	transcript	Y102A5B.3	protein_coding
V	16850562	A	[T]	{A, T}	0.254386	1	TRUE	FALSE	FALSE	0.382705	57	3	13	41	T	missense_variant	MODERATE	clec-37	WBGene00013609	transcript	Y102A5B.3	protein_coding
V	16850563	T	[G]	{G, T}	0.114035	1	TRUE	FALSE	FALSE	0.20385	57	3	5	49	G	missense_variant	MODERATE	clec-37	WBGene00013609	transcript	Y102A5B.3	protein_coding
V	16850575	A	[T, G]	{A, T}	0.0877193	1	TRUE	FALSE	FALSE	0.161466	57	0	5	52	G	missense_variant	MODERATE	clec-37	WBGene00013609	transcript	Y102A5B.3	protein_coding
V	16850600	A	[C, G]	{G, A, C}	0.254386	1	TRUE	FALSE	FALSE	0.382705	57	3	13	41	C	missense_variant	MODERATE	clec-37	WBGene00013609	transcript	Y102A5B.3	protein_coding
V	16850605	C	[A]	{A, C}	0.377193	1	TRUE	FALSE	FALSE	0.473995	57	3	20	34	A	missense_variant	MODERATE	clec-37	WBGene00013609	transcript	Y102A5B.3	protein_coding
V	16850703	G	[A]	{G, A}	0.037037	0.947368	TRUE	FALSE	TRUE	0.0719972	54	2	1	51	A	missense_variant	MODERATE	clec-37	WBGene00013609	transcript	Y102A5B.3	protein_coding
V	16850721	A	[T]	{A, T}	0.0277778	0.947368	TRUE	FALSE	FALSE	0.0545171	54	1	1	52	T	missense_variant	MODERATE	clec-37	WBGene00013609	transcript	Y102A5B.3	protein_coding
V	16850722	A	[G]	{G, A}	0.203704	0.947368	TRUE	FALSE	TRUE	0.327449	54	6	8	40	G	missense_variant	MODERATE	clec-37	WBGene00013609	transcript	Y102A5B.3	protein_coding
V	16850731	C	[A]	{A, C}	0.0175439	1	TRUE	FALSE	FALSE	0.0347772	57	0	1	56	A	missense_variant	MODERATE	clec-37	WBGene00013609	transcript	Y102A5B.3	protein_coding
V	16850740	C	[T]	{C, T}	0.140351	1	TRUE	FALSE	TRUE	0.24344	57	6	5	46	T	missense_variant	MODERATE	clec-37	WBGene00013609	transcript	Y102A5B.3	protein_coding
V	16850749	C	[A]	{A, C}	0.140351	1	TRUE	FALSE	FALSE	0.24344	57	0	8	49	A	missense_variant	MODERATE	clec-37	WBGene00013609	transcript	Y102A5B.3	protein_coding
V	16850752	C	[A]	{A, C}	0.22807	1	TRUE	FALSE	FALSE	0.355224	57	0	13	44	A	missense_variant	MODERATE	clec-37	WBGene00013609	transcript	Y102A5B.3	protein_coding
V	16850763	G	[A]	{G, A}	0.157895	1	TRUE	FALSE	TRUE	0.268281	57	0	9	48	A	missense_variant	MODERATE	clec-37	WBGene00013609	transcript	Y102A5B.3	protein_coding
V	16850764	T	[G, A]	{G, A, T}	0.114035	1	TRUE	FALSE	FALSE	0.20385	57	3	5	49	A	missense_variant	MODERATE	clec-37	WBGene00013609	transcript	Y102A5B.3	protein_coding
V	16850787	T	[C]	{C, T}	0.169643	0.982456	TRUE	FALSE	TRUE	0.284266	56	1	9	46	C	missense_variant	MODERATE	clec-37	WBGene00013609	transcript	Y102A5B.3	protein_coding
V	16850966	T	[G]	{G, T}	0.175439	1	TRUE	FALSE	FALSE	0.29188	57	4	8	45	G	missense_variant	MODERATE	clec-37	WBGene00013609	transcript	Y102A5B.3	protein_coding
V	16850979	A	[C]	{A, C}	0.175439	1	TRUE	FALSE	FALSE	0.29188	57	4	8	45	C	missense_variant	MODERATE	clec-37	WBGene00013609	transcript	Y102A5B.3	protein_coding
V	16850980	A	[T]	{A, T}	0.114035	1	TRUE	FALSE	FALSE	0.20385	57	3	5	49	T	missense_variant	MODERATE	clec-37	WBGene00013609	transcript	Y102A5B.3	protein_coding
V	16850982	C	[T]	{C, T}	0.175439	1	TRUE	FALSE	TRUE	0.29188	57	4	8	45	T	missense_variant	MODERATE	clec-37	WBGene00013609	transcript	Y102A5B.3	protein_coding
V	16850985	G	[C]	{G, C}	0.175439	1	TRUE	FALSE	FALSE	0.29188	57	4	8	45	C	missense_variant	MODERATE	clec-37	WBGene00013609	transcript	Y102A5B.3	protein_coding
V	16850986	T	[G]	{G, T}	0.175439	1	TRUE	FALSE	FALSE	0.29188	57	4	8	45	G	missense_variant	MODERATE	clec-37	WBGene00013609	transcript	Y102A5B.3	protein_coding
V	16850988	T	[C]	{C, T}	0.175439	1	TRUE	FALSE	TRUE	0.29188	57	4	8	45	C	missense_variant	MODERATE	clec-37	WBGene00013609	transcript	Y102A5B.3	protein_coding
V	16851020	G	[A, T]	{G, A}	0.0964912	1	TRUE	FALSE	FALSE	0.175904	57	3	4	50	T	missense_variant	MODERATE	clec-37	WBGene00013609	transcript	Y102A5B.3	protein_coding
V	16851052	G	[A]	{G, A}	0.0789474	1	TRUE	FALSE	TRUE	0.146716	57	1	4	52	A	missense_variant	MODERATE	clec-37	WBGene00013609	transcript	Y102A5B.3	protein_coding
V	16851147	C	[T]	{C, T}	0.0964912	1	TRUE	FALSE	TRUE	0.175904	57	3	4	50	T	missense_variant	MODERATE	clec-37	WBGene00013609	transcript	Y102A5B.3	protein_coding
V	16851148	T	[C]	{C, T}	0.0964912	1	TRUE	FALSE	TRUE	0.175904	57	3	4	50	C	missense_variant	MODERATE	clec-37	WBGene00013609	transcript	Y102A5B.3	protein_coding
V	16851150	T	[G]	{G, T}	0.0964912	1	TRUE	FALSE	FALSE	0.175904	57	3	4	50	G	missense_variant	MODERATE	clec-37	WBGene00013609	transcript	Y102A5B.3	protein_coding
V	16851223	T	[C]	{C, T}	0.140351	1	TRUE	FALSE	TRUE	0.24344	57	0	8	49	C	missense_variant	MODERATE	clec-37	WBGene00013609	transcript	Y102A5B.3	protein_coding
V	16851234	T	[C]	{C, T}	0.184211	1	TRUE	FALSE	TRUE	0.303214	57	5	8	44	C	missense_variant	MODERATE	clec-37	WBGene00013609	transcript	Y102A5B.3	protein_coding
V	16851238	T	[G, C]	{G, C, T}	0.201754	1	TRUE	FALSE	FALSE	0.32495	57	3	10	44	C	missense_variant	MODERATE	clec-37	WBGene00013609	transcript	Y102A5B.3	protein_coding
V	16851317	C	[G]	{G, C}	0.140351	1	TRUE	FALSE	FALSE	0.24344	57	0	8	49	G	missense_variant	MODERATE	clec-37	WBGene00013609	transcript	Y102A5B.3	protein_coding
V	16851322	C	[T]	{C, T}	0.140351	1	TRUE	FALSE	TRUE	0.24344	57	0	8	49	T	missense_variant	MODERATE	clec-37	WBGene00013609	transcript	Y102A5B.3	protein_coding
V	16851350	G	[T]	{G, T}	0.140351	1	TRUE	FALSE	FALSE	0.24344	57	0	8	49	T	missense_variant	MODERATE	clec-37	WBGene00013609	transcript	Y102A5B.3	protein_coding
V	16851363	G	[T]	{G, T}	0.140351	1	TRUE	FALSE	FALSE	0.24344	57	0	8	49	T	missense_variant	MODERATE	clec-37	WBGene00013609	transcript	Y102A5B.3	protein_coding
V	16851365	G	[A]	{G, A}	0.0877193	1	TRUE	FALSE	TRUE	0.161466	57	0	5	52	A	missense_variant	MODERATE	clec-37	WBGene00013609	transcript	Y102A5B.3	protein_coding
V	16851373	T	[A]	{A, T}	0.140351	1	TRUE	FALSE	FALSE	0.24344	57	0	8	49	A	missense_variant	MODERATE	clec-37	WBGene00013609	transcript	Y102A5B.3	protein_coding
V	16851376	G	[T, A]	{G, T}	0.140351	1	TRUE	FALSE	FALSE	0.24344	57	0	8	49	A	missense_variant	MODERATE	clec-37	WBGene00013609	transcript	Y102A5B.3	protein_coding
V	16851385	C	[T]	{C, T}	0.192982	1	TRUE	FALSE	TRUE	0.314237	57	4	9	44	T	missense_variant	MODERATE	clec-37	WBGene00013609	transcript	Y102A5B.3	protein_coding
V	16851386	C	[T]	{C, T}	0.114035	1	TRUE	FALSE	TRUE	0.20385	57	3	5	49	T	missense_variant	MODERATE	clec-37	WBGene00013609	transcript	Y102A5B.3	protein_coding
V	16851625	A	[C]	{A, C}	0.0175439	1	TRUE	FALSE	FALSE	0.0347772	57	0	1	56	C	missense_variant&splice_region_variant	MODERATE	clec-37	WBGene00013609	transcript	Y102A5B.3	protein_coding
V	16851647	A	[G]	{G, A}	0.175439	1	TRUE	FALSE	TRUE	0.29188	57	4	8	45	G	missense_variant	MODERATE	clec-37	WBGene00013609	transcript	Y102A5B.3	protein_coding
V	16851649	A	[T]	{A, T}	0.166667	1	TRUE	FALSE	FALSE	0.280236	57	3	8	46	T	missense_variant	MODERATE	clec-37	WBGene00013609	transcript	Y102A5B.3	protein_coding
V	16851662	G	[A]	{G, A}	0.0964912	1	TRUE	FALSE	TRUE	0.175904	57	3	4	50	A	missense_variant	MODERATE	clec-37	WBGene00013609	transcript	Y102A5B.3	protein_coding
V	16851663	G	[A]	{G, A}	0.0964912	1	TRUE	FALSE	TRUE	0.175904	57	3	4	50	A	missense_variant	MODERATE	clec-37	WBGene00013609	transcript	Y102A5B.3	protein_coding
V	16851794	G	[A]	{G, A}	0.0701754	1	TRUE	FALSE	TRUE	0.131657	57	0	4	53	A	missense_variant&splice_region_variant	MODERATE	clec-37	WBGene00013609	transcript	Y102A5B.3	protein_coding
V	16851808	T	[A]	{A, T}	0.0175439	1	TRUE	FALSE	FALSE	0.0347772	57	0	1	56	A	missense_variant	MODERATE	clec-37	WBGene00013609	transcript	Y102A5B.3	protein_coding
V	16851822	T	[C]	{C, T}	0.0964912	1	TRUE	FALSE	TRUE	0.175904	57	3	4	50	C	missense_variant	MODERATE	clec-37	WBGene00013609	transcript	Y102A5B.3	protein_coding
V	16851836	C	[T]	{C, T}	0.149123	1	TRUE	FALSE	TRUE	0.256016	57	3	7	47	T	missense_variant	MODERATE	clec-37	WBGene00013609	transcript	Y102A5B.3	protein_coding
V	16851847	C	[A]	{A, C}	0.203704	0.947368	TRUE	FALSE	FALSE	0.327449	54	4	9	41	A	missense_variant	MODERATE	clec-37	WBGene00013609	transcript	Y102A5B.3	protein_coding
V	16851848	T	[G]	{G, T}	0.203704	0.947368	TRUE	FALSE	FALSE	0.327449	54	4	9	41	G	missense_variant	MODERATE	clec-37	WBGene00013609	transcript	Y102A5B.3	protein_coding
V	16851857	A	[T]	{A, T}	0.0964912	1	TRUE	FALSE	FALSE	0.175904	57	1	5	51	T	missense_variant	MODERATE	clec-37	WBGene00013609	transcript	Y102A5B.3	protein_coding
V	16851858	T	[C]	{C, T}	0.0964912	1	TRUE	FALSE	TRUE	0.175904	57	3	4	50	C	missense_variant&splice_region_variant	MODERATE	clec-37	WBGene00013609	transcript	Y102A5B.3	protein_coding
V	16851956	C	[T]	{C, T}	0.166667	1	TRUE	FALSE	TRUE	0.280236	57	5	7	45	T	missense_variant	MODERATE	clec-37	WBGene00013609	transcript	Y102A5B.3	protein_coding
V	16851988	G	[A]	{G, A}	0.192982	1	TRUE	FALSE	TRUE	0.314237	57	6	8	43	A	missense_variant	MODERATE	clec-37	WBGene00013609	transcript	Y102A5B.3	protein_coding
V	16851989	A	[C, G]	{A, C}	0.45614	1	TRUE	FALSE	FALSE	0.500543	57	0	26	31	C	missense_variant	MODERATE	clec-37	WBGene00013609	transcript	Y102A5B.3	protein_coding
V	16851999	T	[C]	{C, T}	0.0964912	1	TRUE	FALSE	TRUE	0.175904	57	3	4	50	C	missense_variant	MODERATE	clec-37	WBGene00013609	transcript	Y102A5B.3	protein_coding
V	16852058	G	[A]	{G, A}	0.166667	1	TRUE	FALSE	TRUE	0.280236	57	5	7	45	A	missense_variant	MODERATE	clec-37	WBGene00013609	transcript	Y102A5B.3	protein_coding
V	16852307	G	[A]	{G, A}	0.0175439	1	TRUE	FALSE	TRUE	0.0347772	57	0	1	56	A	missense_variant	MODERATE	clec-35	WBGene00013608	transcript	Y102A5B.2b	protein_coding
V	16852335	G	[A]	{G, A}	0.149123	1	TRUE	FALSE	TRUE	0.256016	57	3	7	47	A	missense_variant	MODERATE	clec-35	WBGene00013608	transcript	Y102A5B.2b	protein_coding
V	16852386	T	[C]	{C, T}	0.114035	1	TRUE	FALSE	TRUE	0.20385	57	3	5	49	C	missense_variant	MODERATE	clec-35	WBGene00013608	transcript	Y102A5B.2b	protein_coding
V	16852436	T	[A]	{A, T}	0.114035	1	TRUE	FALSE	FALSE	0.20385	57	3	5	49	A	missense_variant	MODERATE	clec-35	WBGene00013608	transcript	Y102A5B.2b	protein_coding
V	16852440	C	[T]	{C, T}	0.0175439	1	TRUE	FALSE	TRUE	0.0347772	57	0	1	56	T	missense_variant	MODERATE	clec-35	WBGene00013608	transcript	Y102A5B.2b	protein_coding
V	16852503	C	[T]	{C, T}	0.114035	1	TRUE	FALSE	TRUE	0.20385	57	3	5	49	T	missense_variant	MODERATE	clec-35	WBGene00013608	transcript	Y102A5B.2b	protein_coding
V	16852613	T	[G]	{G, T}	0.157895	1	TRUE	FALSE	FALSE	0.268281	57	4	7	46	G	missense_variant	MODERATE	clec-35	WBGene00013608	transcript	Y102A5B.2b	protein_coding
V	16852626	T	[C]	{C, T}	0.131579	1	TRUE	FALSE	TRUE	0.230554	57	5	5	47	C	missense_variant	MODERATE	clec-35	WBGene00013608	transcript	Y102A5B.2b	protein_coding
V	16852672	G	[T]	{G, T}	0.0701754	1	TRUE	FALSE	FALSE	0.131657	57	0	4	53	T	missense_variant&splice_region_variant	MODERATE	clec-35	WBGene00013608	transcript	Y102A5B.2b	protein_coding
V	16852871	G	[C, A]	{G, A, C}	0.0438596	1	TRUE	FALSE	FALSE	0.0846142	57	3	1	53	A	missense_variant	MODERATE	clec-35	WBGene00013608	transcript	Y102A5B.2b	protein_coding
V	16852877	G	[T, C]	{G, C, T}	0.0350877	1	TRUE	FALSE	FALSE	0.0683124	57	0	2	55	C	missense_variant	MODERATE	clec-35	WBGene00013608	transcript	Y102A5B.2b	protein_coding
V	16852883	C	[T]	{C, T}	0.0175439	1	TRUE	FALSE	TRUE	0.0347772	57	0	1	56	T	missense_variant	MODERATE	clec-35	WBGene00013608	transcript	Y102A5B.2b	protein_coding
V	16852903	G	[C]	{G, C}	0.0789474	1	TRUE	FALSE	FALSE	0.146716	57	1	4	52	C	missense_variant	MODERATE	clec-35	WBGene00013608	transcript	Y102A5B.2b	protein_coding
V	16852911	T	[C]	{C, T}	0.0175439	1	TRUE	FALSE	TRUE	0.0347772	57	0	1	56	C	missense_variant	MODERATE	clec-35	WBGene00013608	transcript	Y102A5B.2b	protein_coding
V	16852920	T	[C]	{C, T}	0.0789474	1	TRUE	FALSE	TRUE	0.146716	57	1	4	52	C	missense_variant	MODERATE	clec-35	WBGene00013608	transcript	Y102A5B.2b	protein_coding
V	16852983	C	[T]	{C, T}	0.0535714	0.982456	TRUE	FALSE	TRUE	0.102317	56	0	3	53	T	missense_variant&splice_region_variant	MODERATE	clec-35	WBGene00013608	transcript	Y102A5B.2b	protein_coding
V	16853013	C	[A]	{A, C}	0.0964912	1	TRUE	FALSE	FALSE	0.175904	57	3	4	50	A	missense_variant	MODERATE	clec-35	WBGene00013608	transcript	Y102A5B.2b	protein_coding
V	16853022	C	[T]	{C, T}	0.0175439	1	TRUE	FALSE	TRUE	0.0347772	57	0	1	56	T	missense_variant	MODERATE	clec-35	WBGene00013608	transcript	Y102A5B.2b	protein_coding
V	16853063	G	[T]	{G, T}	0.0964912	1	TRUE	FALSE	FALSE	0.175904	57	3	4	50	T	missense_variant	MODERATE	clec-35	WBGene00013608	transcript	Y102A5B.2b	protein_coding
V	16853103	C	[T]	{C, T}	0.0350877	1	TRUE	FALSE	TRUE	0.0683124	57	0	2	55	T	missense_variant	MODERATE	clec-35	WBGene00013608	transcript	Y102A5B.2b	protein_coding
V	16853109	C	[T]	{C, T}	0.232143	0.982456	TRUE	FALSE	TRUE	0.359717	56	2	12	42	T	missense_variant	MODERATE	clec-35	WBGene00013608	transcript	Y102A5B.2b	protein_coding
V	16853135	G	[T]	{G, T}	0.0175439	1	TRUE	FALSE	FALSE	0.0347772	57	0	1	56	T	missense_variant	MODERATE	clec-35	WBGene00013608	transcript	Y102A5B.2b	protein_coding
V	16853202	A	[T]	{A, T}	0.0614035	1	TRUE	FALSE	FALSE	0.116286	57	1	3	53	T	missense_variant	MODERATE	clec-35	WBGene00013608	transcript	Y102A5B.2b	protein_coding
V	16853233	C	[T]	{C, T}	0.140351	1	TRUE	FALSE	TRUE	0.24344	57	6	5	46	T	missense_variant	MODERATE	clec-35	WBGene00013608	transcript	Y102A5B.2b	protein_coding
V	16853669	G	[A]	{G, A}	0.0701754	1	TRUE	FALSE	TRUE	0.131657	57	0	4	53	A	missense_variant	MODERATE	clec-35	WBGene00013608	transcript	Y102A5B.2b	protein_coding
V	16853780	C	[T]	{C, T}	0.122807	1	TRUE	FALSE	TRUE	0.217358	57	0	7	50	T	missense_variant	MODERATE	clec-35	WBGene00013608	transcript	Y102A5B.2b	protein_coding
V	16853793	T	[C]	{C, T}	0.210526	1	TRUE	FALSE	TRUE	0.335352	57	0	12	45	C	missense_variant	MODERATE	clec-35	WBGene00013608	transcript	Y102A5B.2b	protein_coding
V	16853796	C	[T]	{C, T}	0.210526	1	TRUE	FALSE	TRUE	0.335352	57	0	12	45	T	missense_variant	MODERATE	clec-35	WBGene00013608	transcript	Y102A5B.2b	protein_coding
V	16853800	A	[T]	{A, T}	0.122807	1	TRUE	FALSE	FALSE	0.217358	57	0	7	50	T	missense_variant	MODERATE	clec-35	WBGene00013608	transcript	Y102A5B.2b	protein_coding
V	16853836	T	[C]	{C, T}	0.125	0.982456	TRUE	FALSE	TRUE	0.220721	56	0	7	49	C	missense_variant	MODERATE	clec-35	WBGene00013608	transcript	Y102A5B.2b	protein_coding
V	16853918	C	[A]	{A, C}	0.210526	1	TRUE	FALSE	FALSE	0.335352	57	0	12	45	A	missense_variant&splice_region_variant	MODERATE	clec-35	WBGene00013608	transcript	Y102A5B.2b	protein_coding
V	16853929	A	[G]	{G, A}	0.22807	1	TRUE	FALSE	TRUE	0.355224	57	2	12	43	G	missense_variant	MODERATE	clec-35	WBGene00013608	transcript	Y102A5B.2b	protein_coding
V	16853965	C	[A]	{A, C}	0.0175439	1	TRUE	FALSE	FALSE	0.0347772	57	0	1	56	A	missense_variant	MODERATE	clec-35	WBGene00013608	transcript	Y102A5B.2b	protein_coding
V	16853993	C	[T]	{C, T}	0.210526	1	TRUE	FALSE	TRUE	0.335352	57	0	12	45	T	missense_variant	MODERATE	clec-35	WBGene00013608	transcript	Y102A5B.2b	protein_coding
V	16853995	C	[A, G]	{A, C}	0.210526	1	TRUE	FALSE	FALSE	0.335352	57	0	12	45	A	missense_variant	MODERATE	clec-35	WBGene00013608	transcript	Y102A5B.2b	protein_coding
V	16853999	A	[G]	{G, A}	0.0526316	1	TRUE	FALSE	TRUE	0.100605	57	0	3	54	G	missense_variant	MODERATE	clec-35	WBGene00013608	transcript	Y102A5B.2b	protein_coding
V	16854010	T	[A]	{A, T}	0.210526	1	TRUE	FALSE	FALSE	0.335352	57	0	12	45	A	missense_variant	MODERATE	clec-35	WBGene00013608	transcript	Y102A5B.2b	protein_coding
V	16854014	A	[C]	{A, C}	0.0526316	1	TRUE	FALSE	FALSE	0.100605	57	0	3	54	C	missense_variant	MODERATE	clec-35	WBGene00013608	transcript	Y102A5B.2b	protein_coding
V	16854020	G	[C]	{G, C}	0.210526	1	TRUE	FALSE	FALSE	0.335352	57	0	12	45	C	missense_variant	MODERATE	clec-35	WBGene00013608	transcript	Y102A5B.2b	protein_coding
V	16854035	G	[T]	{G, T}	0.157895	1	TRUE	FALSE	FALSE	0.268281	57	0	9	48	T	missense_variant	MODERATE	clec-35	WBGene00013608	transcript	Y102A5B.2b	protein_coding
V	16854044	C	[T]	{C, T}	0.122807	1	TRUE	FALSE	TRUE	0.217358	57	0	7	50	T	missense_variant	MODERATE	clec-35	WBGene00013608	transcript	Y102A5B.2b	protein_coding
V	16854047	A	[G]	{G, A}	0.122807	1	TRUE	FALSE	TRUE	0.217358	57	0	7	50	G	missense_variant	MODERATE	clec-35	WBGene00013608	transcript	Y102A5B.2b	protein_coding
V	16854680	G	[A]	{G, A}	0.0526316	1	TRUE	FALSE	TRUE	0.100605	57	0	3	54	A	missense_variant	MODERATE	clec-27	WBGene00013607	transcript	Y102A5B.1	protein_coding
V	16854684	T	[C, A]	{A, C, T}	0.0438596	1	TRUE	FALSE	FALSE	0.0846142	57	3	1	53	A	missense_variant	MODERATE	clec-27	WBGene00013607	transcript	Y102A5B.1	protein_coding
V	16854713	A	[G]	{G, A}	0.166667	1	TRUE	FALSE	TRUE	0.280236	57	5	7	45	G	missense_variant	MODERATE	clec-27	WBGene00013607	transcript	Y102A5B.1	protein_coding
V	16854724	G	[T]	{G, T}	0.0614035	1	TRUE	FALSE	FALSE	0.116286	57	3	2	52	T	missense_variant	MODERATE	clec-27	WBGene00013607	transcript	Y102A5B.1	protein_coding
V	16854725	T	[C]	{C, T}	0.22807	1	TRUE	FALSE	TRUE	0.355224	57	2	12	43	C	missense_variant	MODERATE	clec-27	WBGene00013607	transcript	Y102A5B.1	protein_coding
V	16854735	T	[A]	{A, T}	0.0614035	1	TRUE	FALSE	FALSE	0.116286	57	3	2	52	A	missense_variant	MODERATE	clec-27	WBGene00013607	transcript	Y102A5B.1	protein_coding
V	16854822	G	[T, A]	{G, A, T}	0.210526	1	TRUE	FALSE	FALSE	0.335352	57	0	12	45	T	missense_variant	MODERATE	clec-27	WBGene00013607	transcript	Y102A5B.1	protein_coding
V	16854826	C	[A]	{A, C}	0.22807	1	TRUE	FALSE	FALSE	0.355224	57	2	12	43	A	missense_variant	MODERATE	clec-27	WBGene00013607	transcript	Y102A5B.1	protein_coding
V	16854951	G	[C]	{G, C}	0.0614035	1	TRUE	FALSE	FALSE	0.116286	57	3	2	52	C	missense_variant	MODERATE	clec-27	WBGene00013607	transcript	Y102A5B.1	protein_coding
V	16855013	A	[G]	{G, A}	0.0614035	1	TRUE	FALSE	TRUE	0.116286	57	3	2	52	G	missense_variant	MODERATE	clec-27	WBGene00013607	transcript	Y102A5B.1	protein_coding
V	16855014	C	[T]	{C, T}	0.0614035	1	TRUE	FALSE	TRUE	0.116286	57	3	2	52	T	missense_variant	MODERATE	clec-27	WBGene00013607	transcript	Y102A5B.1	protein_coding
V	16855028	T	[TCGC]	{TCGC, T}	0.0526316	1	FALSE	TRUE	FALSE	0.100605	57	0	3	54	TCGC	conservative_inframe_insertion	MODERATE	clec-27	WBGene00013607	transcript	Y102A5B.1	protein_coding
V	16855101	C	[T]	{C, T}	0.0614035	1	TRUE	FALSE	TRUE	0.116286	57	3	2	52	T	missense_variant&splice_region_variant	MODERATE	clec-27	WBGene00013607	transcript	Y102A5B.1	protein_coding
V	16855136	T	[C]	{C, T}	0.175439	1	TRUE	FALSE	TRUE	0.29188	57	2	9	46	C	missense_variant	MODERATE	clec-27	WBGene00013607	transcript	Y102A5B.1	protein_coding
V	16855143	A	[G]	{G, A}	0.0526316	1	TRUE	FALSE	TRUE	0.100605	57	0	3	54	G	missense_variant	MODERATE	clec-27	WBGene00013607	transcript	Y102A5B.1	protein_coding
V	16855173	C	[T]	{C, T}	0.0526316	1	TRUE	FALSE	TRUE	0.100605	57	0	3	54	T	missense_variant	MODERATE	clec-27	WBGene00013607	transcript	Y102A5B.1	protein_coding
V	16855180	T	[G]	{G, T}	0.0614035	1	TRUE	FALSE	FALSE	0.116286	57	3	2	52	G	missense_variant	MODERATE	clec-27	WBGene00013607	transcript	Y102A5B.1	protein_coding
V	16855185	C	[T]	{C, T}	0.0614035	1	TRUE	FALSE	TRUE	0.116286	57	3	2	52	T	missense_variant	MODERATE	clec-27	WBGene00013607	transcript	Y102A5B.1	protein_coding
V	16855200	C	[T]	{C, T}	0.140351	1	TRUE	FALSE	TRUE	0.24344	57	0	8	49	T	missense_variant	MODERATE	clec-27	WBGene00013607	transcript	Y102A5B.1	protein_coding
V	16855304	A	[G, C]	{G, A, C}	0.0877193	1	TRUE	FALSE	FALSE	0.161466	57	0	5	52	C	missense_variant	MODERATE	clec-27	WBGene00013607	transcript	Y102A5B.1	protein_coding
V	16855329	G	[A]	{G, A}	0.22807	1	TRUE	FALSE	TRUE	0.355224	57	2	12	43	A	missense_variant	MODERATE	clec-27	WBGene00013607	transcript	Y102A5B.1	protein_coding
V	16855335	G	[A]	{G, A}	0.192982	1	TRUE	FALSE	TRUE	0.314237	57	6	8	43	A	missense_variant	MODERATE	clec-27	WBGene00013607	transcript	Y102A5B.1	protein_coding
V	16855340	T	[G]	{G, T}	0.175439	1	TRUE	FALSE	FALSE	0.29188	57	2	9	46	G	missense_variant	MODERATE	clec-27	WBGene00013607	transcript	Y102A5B.1	protein_coding
V	16855370	T	[G]	{G, T}	0.149123	1	TRUE	FALSE	FALSE	0.256016	57	7	5	45	G	missense_variant	MODERATE	clec-27	WBGene00013607	transcript	Y102A5B.1	protein_coding
V	16855375	G	[A]	{G, A}	0.166667	1	TRUE	FALSE	TRUE	0.280236	57	5	7	45	A	missense_variant	MODERATE	clec-27	WBGene00013607	transcript	Y102A5B.1	protein_coding
V	16855401	G	[A]	{G, A}	0.166667	1	TRUE	FALSE	TRUE	0.280236	57	5	7	45	A	missense_variant	MODERATE	clec-27	WBGene00013607	transcript	Y102A5B.1	protein_coding
V	16855410	G	[A, T]	{G, A}	0.0614035	1	TRUE	FALSE	FALSE	0.116286	57	3	2	52	A	missense_variant	MODERATE	clec-27	WBGene00013607	transcript	Y102A5B.1	protein_coding
V	16855496	A	[G]	{G, A}	0.122807	1	TRUE	FALSE	TRUE	0.217358	57	0	7	50	G	missense_variant	MODERATE	clec-27	WBGene00013607	transcript	Y102A5B.1	protein_coding
V	16855504	A	[T]	{A, T}	0.0789474	1	TRUE	FALSE	FALSE	0.146716	57	1	4	52	T	missense_variant	MODERATE	clec-27	WBGene00013607	transcript	Y102A5B.1	protein_coding
V	16855507	G	[A]	{G, A}	0.0789474	1	TRUE	FALSE	TRUE	0.146716	57	1	4	52	A	missense_variant	MODERATE	clec-27	WBGene00013607	transcript	Y102A5B.1	protein_coding
V	16855508	G	[A]	{G, A}	0.0789474	1	TRUE	FALSE	TRUE	0.146716	57	1	4	52	A	missense_variant	MODERATE	clec-27	WBGene00013607	transcript	Y102A5B.1	protein_coding
V	16855537	T	[C]	{C, T}	0.0526316	1	TRUE	FALSE	TRUE	0.100605	57	0	3	54	C	missense_variant	MODERATE	clec-27	WBGene00013607	transcript	Y102A5B.1	protein_coding
V	16855543	G	[A]	{G, A}	0.0526316	1	TRUE	FALSE	TRUE	0.100605	57	0	3	54	A	missense_variant	MODERATE	clec-27	WBGene00013607	transcript	Y102A5B.1	protein_coding
V	16855565	C	[T]	{C, T}	0.0175439	1	TRUE	FALSE	TRUE	0.0347772	57	0	1	56	T	missense_variant	MODERATE	clec-27	WBGene00013607	transcript	Y102A5B.1	protein_coding
V	16855570	A	[G]	{G, A}	0.192982	1	TRUE	FALSE	TRUE	0.314237	57	0	11	46	G	missense_variant	MODERATE	clec-27	WBGene00013607	transcript	Y102A5B.1	protein_coding
V	16855572	T	[A]	{A, T}	0.192982	1	TRUE	FALSE	FALSE	0.314237	57	0	11	46	A	missense_variant	MODERATE	clec-27	WBGene00013607	transcript	Y102A5B.1	protein_coding
V	16855573	A	[G]	{G, A}	0.192982	1	TRUE	FALSE	TRUE	0.314237	57	0	11	46	G	missense_variant	MODERATE	clec-27	WBGene00013607	transcript	Y102A5B.1	protein_coding
V	16855575	G	[T]	{G, T}	0.140351	1	TRUE	FALSE	FALSE	0.24344	57	0	8	49	T	missense_variant	MODERATE	clec-27	WBGene00013607	transcript	Y102A5B.1	protein_coding
V	16855604	C	[A, T]	{A, C, T}	0.0789474	1	TRUE	FALSE	FALSE	0.146716	57	3	3	51	A	missense_variant	MODERATE	clec-27	WBGene00013607	transcript	Y102A5B.1	protein_coding
V	16855612	C	[T, A]	{A, C, T}	0.192982	1	TRUE	FALSE	FALSE	0.314237	57	2	10	45	A	missense_variant	MODERATE	clec-27	WBGene00013607	transcript	Y102A5B.1	protein_coding
V	16855615	G	[A]	{G, A}	0.122807	1	TRUE	FALSE	TRUE	0.217358	57	0	7	50	A	missense_variant&splice_region_variant	MODERATE	clec-27	WBGene00013607	transcript	Y102A5B.1	protein_coding
V	16855812	A	[T]	{A, T}	0.210526	1	TRUE	FALSE	FALSE	0.335352	57	0	12	45	T	missense_variant	MODERATE	clec-27	WBGene00013607	transcript	Y102A5B.1	protein_coding
V	16855830	T	[C]	{C, T}	0.350877	1	TRUE	FALSE	TRUE	0.459556	57	2	19	36	C	missense_variant	MODERATE	clec-27	WBGene00013607	transcript	Y102A5B.1	protein_coding
V	16855841	C	[G]	{G, C}	0.218182	0.964912	TRUE	FALSE	FALSE	0.344287	55	0	12	43	G	missense_variant	MODERATE	clec-27	WBGene00013607	transcript	Y102A5B.1	protein_coding
V	16855871	A	[T]	{A, T}	0.140351	1	TRUE	FALSE	FALSE	0.24344	57	0	8	49	T	missense_variant	MODERATE	clec-27	WBGene00013607	transcript	Y102A5B.1	protein_coding
V	16855878	C	[T, A]	{A, C, T}	0.0350877	1	TRUE	FALSE	FALSE	0.0683124	57	4	0	53	A	missense_variant	MODERATE	clec-27	WBGene00013607	transcript	Y102A5B.1	protein_coding
V	16855893	A	[G]	{G, A}	0.236842	1	TRUE	FALSE	TRUE	0.364695	57	3	12	42	G	missense_variant	MODERATE	clec-27	WBGene00013607	transcript	Y102A5B.1	protein_coding
V	16855898	G	[C, A]	{G, A, C}	0.307018	1	TRUE	FALSE	FALSE	0.429281	57	3	16	38	A	missense_variant	MODERATE	clec-27	WBGene00013607	transcript	Y102A5B.1	protein_coding
V	16855899	T	[C]	{C, T}	0.236842	1	TRUE	FALSE	TRUE	0.364695	57	3	12	42	C	missense_variant	MODERATE	clec-27	WBGene00013607	transcript	Y102A5B.1	protein_coding
V	16855944	A	[C]	{A, C}	0.324561	1	TRUE	FALSE	FALSE	0.442323	57	5	16	36	C	missense_variant	MODERATE	clec-27	WBGene00013607	transcript	Y102A5B.1	protein_coding
V	16855949	C	[G]	{G, C}	0.245614	1	TRUE	FALSE	FALSE	0.373855	57	4	12	41	G	missense_variant	MODERATE	clec-27	WBGene00013607	transcript	Y102A5B.1	protein_coding
V	16855983	G	[A]	{G, A}	0.324561	1	TRUE	FALSE	TRUE	0.442323	57	5	16	36	A	missense_variant	MODERATE	clec-27	WBGene00013607	transcript	Y102A5B.1	protein_coding
V	16856023	T	[C, A]	{C, T}	0.210526	1	TRUE	FALSE	FALSE	0.335352	57	0	12	45	A	missense_variant	MODERATE	clec-27	WBGene00013607	transcript	Y102A5B.1	protein_coding
V	16856065	C	[G]	{G, C}	0.210526	1	TRUE	FALSE	FALSE	0.335352	57	0	12	45	G	missense_variant	MODERATE	clec-27	WBGene00013607	transcript	Y102A5B.1	protein_coding
V	16856069	G	[A]	{G, A}	0.210526	1	TRUE	FALSE	TRUE	0.335352	57	0	12	45	A	missense_variant	MODERATE	clec-27	WBGene00013607	transcript	Y102A5B.1	protein_coding
V	16856113	T	[G, A]	{G, T}	0.0526316	1	TRUE	FALSE	FALSE	0.100605	57	0	3	54	A	missense_variant	MODERATE	clec-27	WBGene00013607	transcript	Y102A5B.1	protein_coding
V	16856114	G	[A]	{G, A}	0.324561	1	TRUE	FALSE	TRUE	0.442323	57	5	16	36	A	missense_variant	MODERATE	clec-27	WBGene00013607	transcript	Y102A5B.1	protein_coding
V	16856133	A	[G]	{G, A}	0.324561	1	TRUE	FALSE	TRUE	0.442323	57	5	16	36	G	missense_variant	MODERATE	clec-27	WBGene00013607	transcript	Y102A5B.1	protein_coding
V	16856135	A	[C]	{A, C}	0.210526	1	TRUE	FALSE	FALSE	0.335352	57	0	12	45	C	missense_variant	MODERATE	clec-27	WBGene00013607	transcript	Y102A5B.1	protein_coding
V	16856142	G	[T]	{G, T}	0.0438596	1	TRUE	FALSE	FALSE	0.0846142	57	3	1	53	T	missense_variant	MODERATE	clec-27	WBGene00013607	transcript	Y102A5B.1	protein_coding
V	16856471	C	[T]	{C, T}	0.210526	1	TRUE	FALSE	TRUE	0.335352	57	0	12	45	T	missense_variant	MODERATE	clec-31	WBGene00009854	transcript	F49A5.2	protein_coding
V	16856474	G	[A]	{G, A}	0.280702	1	TRUE	FALSE	TRUE	0.40739	57	0	16	41	A	missense_variant	MODERATE	clec-31	WBGene00009854	transcript	F49A5.2	protein_coding
V	16856477	G	[A]	{G, A}	0.0175439	1	TRUE	FALSE	TRUE	0.0347772	57	0	1	56	A	missense_variant	MODERATE	clec-31	WBGene00009854	transcript	F49A5.2	protein_coding
V	16856487	A	[C]	{A, C}	0.140351	1	TRUE	FALSE	FALSE	0.24344	57	0	8	49	C	missense_variant	MODERATE	clec-31	WBGene00009854	transcript	F49A5.2	protein_coding
V	16856505	G	[T]	{G, T}	0.0701754	1	TRUE	FALSE	FALSE	0.131657	57	0	4	53	T	missense_variant	MODERATE	clec-31	WBGene00009854	transcript	F49A5.2	protein_coding
V	16856527	A	[C]	{A, C}	0.280702	1	TRUE	FALSE	FALSE	0.40739	57	0	16	41	C	missense_variant	MODERATE	clec-31	WBGene00009854	transcript	F49A5.2	protein_coding
V	16856528	A	[G]	{G, A}	0.210526	1	TRUE	FALSE	TRUE	0.335352	57	0	12	45	G	missense_variant	MODERATE	clec-31	WBGene00009854	transcript	F49A5.2	protein_coding
V	16856529	A	[T]	{A, T}	0.280702	1	TRUE	FALSE	FALSE	0.40739	57	0	16	41	T	missense_variant	MODERATE	clec-31	WBGene00009854	transcript	F49A5.2	protein_coding
V	16856534	C	[A]	{A, C}	0.0350877	1	TRUE	FALSE	FALSE	0.0683124	57	0	2	55	A	missense_variant	MODERATE	clec-31	WBGene00009854	transcript	F49A5.2	protein_coding
V	16856540	T	[C]	{C, T}	0.280702	1	TRUE	FALSE	TRUE	0.40739	57	0	16	41	C	missense_variant	MODERATE	clec-31	WBGene00009854	transcript	F49A5.2	protein_coding
V	16856550	C	[T]	{C, T}	0.0701754	1	TRUE	FALSE	TRUE	0.131657	57	0	4	53	T	missense_variant	MODERATE	clec-31	WBGene00009854	transcript	F49A5.2	protein_coding
V	16856552	C	[A]	{A, C}	0.210526	1	TRUE	FALSE	FALSE	0.335352	57	0	12	45	A	missense_variant	MODERATE	clec-31	WBGene00009854	transcript	F49A5.2	protein_coding
V	16856575	C	[A]	{A, C}	0.210526	1	TRUE	FALSE	FALSE	0.335352	57	0	12	45	A	missense_variant	MODERATE	clec-31	WBGene00009854	transcript	F49A5.2	protein_coding
V	16856579	G	[T]	{G, T}	0.280702	1	TRUE	FALSE	FALSE	0.40739	57	0	16	41	T	missense_variant	MODERATE	clec-31	WBGene00009854	transcript	F49A5.2	protein_coding
V	16856580	T	[G]	{G, T}	0.280702	1	TRUE	FALSE	FALSE	0.40739	57	0	16	41	G	missense_variant	MODERATE	clec-31	WBGene00009854	transcript	F49A5.2	protein_coding
V	16856606	A	[G]	{G, A}	0.210526	1	TRUE	FALSE	TRUE	0.335352	57	0	12	45	G	missense_variant	MODERATE	clec-31	WBGene00009854	transcript	F49A5.2	protein_coding
V	16856671	G	[GTAA]	{G, GTAA}	0.0526316	1	FALSE	TRUE	FALSE	0.100605	57	2	2	53	GTAA	disruptive_inframe_insertion	MODERATE	clec-31	WBGene00009854	transcript	F49A5.2	protein_coding
V	16856703	G	[A]	{G, A}	0.122807	1	TRUE	FALSE	TRUE	0.217358	57	0	7	50	A	missense_variant	MODERATE	clec-31	WBGene00009854	transcript	F49A5.2	protein_coding
V	16856747	G	[T]	{G, T}	0.210526	1	TRUE	FALSE	FALSE	0.335352	57	0	12	45	T	missense_variant	MODERATE	clec-31	WBGene00009854	transcript	F49A5.2	protein_coding
V	16856755	G	[T, A]	{G, A}	0.0175439	1	TRUE	FALSE	FALSE	0.0347772	57	0	1	56	T	missense_variant	MODERATE	clec-31	WBGene00009854	transcript	F49A5.2	protein_coding
V	16856759	G	[T]	{G, T}	0.280702	1	TRUE	FALSE	FALSE	0.40739	57	0	16	41	T	missense_variant	MODERATE	clec-31	WBGene00009854	transcript	F49A5.2	protein_coding
V	16856772	C	[T]	{C, T}	0.210526	1	TRUE	FALSE	TRUE	0.335352	57	0	12	45	T	missense_variant	MODERATE	clec-31	WBGene00009854	transcript	F49A5.2	protein_coding
V	16856819	A	[T]	{A, T}	0.45614	1	TRUE	FALSE	FALSE	0.500543	57	0	26	31	T	missense_variant	MODERATE	clec-31	WBGene00009854	transcript	F49A5.2	protein_coding
V	16856821	G	[A, T]	{G, A}	0.210526	1	TRUE	FALSE	FALSE	0.335352	57	0	12	45	T	missense_variant	MODERATE	clec-31	WBGene00009854	transcript	F49A5.2	protein_coding
V	16856881	A	[C]	{A, C}	0.0526316	1	TRUE	FALSE	FALSE	0.100605	57	0	3	54	C	missense_variant&splice_region_variant	MODERATE	clec-31	WBGene00009854	transcript	F49A5.2	protein_coding
V	16856930	G	[A]	{G, A}	0.0701754	1	TRUE	FALSE	TRUE	0.131657	57	0	4	53	A	missense_variant	MODERATE	clec-31	WBGene00009854	transcript	F49A5.2	protein_coding
V	16856932	G	[A, T]	{G, A}	0.280702	1	TRUE	FALSE	FALSE	0.40739	57	0	16	41	T	missense_variant	MODERATE	clec-31	WBGene00009854	transcript	F49A5.2	protein_coding
V	16856933	T	[C]	{C, T}	0.280702	1	TRUE	FALSE	TRUE	0.40739	57	0	16	41	C	missense_variant	MODERATE	clec-31	WBGene00009854	transcript	F49A5.2	protein_coding
V	16856964	C	[T]	{C, T}	0.280702	1	TRUE	FALSE	TRUE	0.40739	57	0	16	41	T	missense_variant	MODERATE	clec-31	WBGene00009854	transcript	F49A5.2	protein_coding
V	16856976	A	[G]	{G, A}	0.0701754	1	TRUE	FALSE	TRUE	0.131657	57	0	4	53	G	missense_variant	MODERATE	clec-31	WBGene00009854	transcript	F49A5.2	protein_coding
V	16857073	A	[G]	{G, A}	0.0701754	1	TRUE	FALSE	TRUE	0.131657	57	0	4	53	G	missense_variant	MODERATE	clec-31	WBGene00009854	transcript	F49A5.2	protein_coding
V	16857077	G	[A]	{G, A}	0.0701754	1	TRUE	FALSE	TRUE	0.131657	57	0	4	53	A	missense_variant	MODERATE	clec-31	WBGene00009854	transcript	F49A5.2	protein_coding
V	16857095	G	[C]	{G, C}	0.0701754	1	TRUE	FALSE	FALSE	0.131657	57	0	4	53	C	missense_variant	MODERATE	clec-31	WBGene00009854	transcript	F49A5.2	protein_coding
V	16857100	T	[C]	{C, T}	0.0701754	1	TRUE	FALSE	TRUE	0.131657	57	0	4	53	C	missense_variant	MODERATE	clec-31	WBGene00009854	transcript	F49A5.2	protein_coding
V	16857107	C	[T]	{C, T}	0.157895	1	TRUE	FALSE	TRUE	0.268281	57	0	9	48	T	missense_variant	MODERATE	clec-31	WBGene00009854	transcript	F49A5.2	protein_coding
V	16857128	C	[A]	{A, C}	0.22807	1	TRUE	FALSE	FALSE	0.355224	57	0	13	44	A	missense_variant	MODERATE	clec-31	WBGene00009854	transcript	F49A5.2	protein_coding
V	16857136	T	[C]	{C, T}	0.22807	1	TRUE	FALSE	TRUE	0.355224	57	0	13	44	C	missense_variant	MODERATE	clec-31	WBGene00009854	transcript	F49A5.2	protein_coding
V	16857158	C	[T]	{C, T}	0.157895	1	TRUE	FALSE	TRUE	0.268281	57	0	9	48	T	missense_variant	MODERATE	clec-31	WBGene00009854	transcript	F49A5.2	protein_coding
V	16857173	G	[A]	{G, A}	0.22807	1	TRUE	FALSE	TRUE	0.355224	57	0	13	44	A	missense_variant	MODERATE	clec-31	WBGene00009854	transcript	F49A5.2	protein_coding
V	16857181	T	[A]	{A, T}	0.0175439	1	TRUE	FALSE	FALSE	0.0347772	57	0	1	56	A	missense_variant	MODERATE	clec-31	WBGene00009854	transcript	F49A5.2	protein_coding
V	16857266	G	[T]	{G, T}	0.0526316	1	TRUE	FALSE	FALSE	0.100605	57	0	3	54	T	missense_variant	MODERATE	clec-31	WBGene00009854	transcript	F49A5.2	protein_coding
V	16857304	T	[G]	{G, T}	0.0701754	1	TRUE	FALSE	FALSE	0.131657	57	0	4	53	G	missense_variant	MODERATE	clec-31	WBGene00009854	transcript	F49A5.2	protein_coding
V	16857308	C	[T]	{C, T}	0.157895	1	TRUE	FALSE	TRUE	0.268281	57	0	9	48	T	missense_variant	MODERATE	clec-31	WBGene00009854	transcript	F49A5.2	protein_coding
V	16857311	G	[C]	{G, C}	0.192982	1	TRUE	FALSE	FALSE	0.314237	57	0	11	46	C	missense_variant	MODERATE	clec-31	WBGene00009854	transcript	F49A5.2	protein_coding
V	16857312	T	[A, C]	{A, C, T}	0.0701754	1	TRUE	FALSE	FALSE	0.131657	57	0	4	53	A	missense_variant	MODERATE	clec-31	WBGene00009854	transcript	F49A5.2	protein_coding
V	16857314	T	[C]	{C, T}	0.140351	1	TRUE	FALSE	TRUE	0.24344	57	0	8	49	C	missense_variant	MODERATE	clec-31	WBGene00009854	transcript	F49A5.2	protein_coding
V	16857358	G	[A, C]	{G, A}	0.157895	1	TRUE	FALSE	FALSE	0.268281	57	0	9	48	C	missense_variant	MODERATE	clec-31	WBGene00009854	transcript	F49A5.2	protein_coding
V	16857365	A	[G]	{G, A}	0.0701754	1	TRUE	FALSE	TRUE	0.131657	57	0	4	53	G	missense_variant	MODERATE	clec-31	WBGene00009854	transcript	F49A5.2	protein_coding
V	16857366	A	[G]	{G, A}	0.0701754	1	TRUE	FALSE	TRUE	0.131657	57	0	4	53	G	missense_variant	MODERATE	clec-31	WBGene00009854	transcript	F49A5.2	protein_coding
V	16857376	A	[T]	{A, T}	0.157895	1	TRUE	FALSE	FALSE	0.268281	57	0	9	48	T	missense_variant	MODERATE	clec-31	WBGene00009854	transcript	F49A5.2	protein_coding
V	16857377	C	[T]	{C, T}	0.0701754	1	TRUE	FALSE	TRUE	0.131657	57	0	4	53	T	missense_variant	MODERATE	clec-31	WBGene00009854	transcript	F49A5.2	protein_coding
V	16857527	A	[C]	{A, C}	0.0714286	0.982456	TRUE	FALSE	FALSE	0.133848	56	0	4	52	C	missense_variant	MODERATE	clec-31	WBGene00009854	transcript	F49A5.2	protein_coding
V	16857530	G	[T]	{G, T}	0.0714286	0.982456	TRUE	FALSE	FALSE	0.133848	56	0	4	52	T	missense_variant	MODERATE	clec-31	WBGene00009854	transcript	F49A5.2	protein_coding
V	16857538	C	[T]	{C, T}	0.0714286	0.982456	TRUE	FALSE	TRUE	0.133848	56	0	4	52	T	missense_variant	MODERATE	clec-31	WBGene00009854	transcript	F49A5.2	protein_coding
V	16857550	T	[G, A]	{G, T}	0.0714286	0.982456	TRUE	FALSE	FALSE	0.133848	56	0	4	52	A	missense_variant	MODERATE	clec-31	WBGene00009854	transcript	F49A5.2	protein_coding
V	16857651	T	[C]	{C, T}	0.125	0.982456	TRUE	FALSE	TRUE	0.220721	56	0	7	49	C	missense_variant	MODERATE	clec-31	WBGene00009854	transcript	F49A5.2	protein_coding
V	16857667	G	[C]	{G, C}	0.421053	1	TRUE	FALSE	FALSE	0.491849	57	0	24	33	C	missense_variant	MODERATE	clec-31	WBGene00009854	transcript	F49A5.2	protein_coding
V	16857702	A	[T]	{A, T}	0.22807	1	TRUE	FALSE	FALSE	0.355224	57	0	13	44	T	missense_variant	MODERATE	clec-31	WBGene00009854	transcript	F49A5.2	protein_coding
V	16857710	A	[G]	{G, A}	0.22807	1	TRUE	FALSE	TRUE	0.355224	57	0	13	44	G	missense_variant	MODERATE	clec-31	WBGene00009854	transcript	F49A5.2	protein_coding
V	16857719	G	[A]	{G, A}	0.0701754	1	TRUE	FALSE	TRUE	0.131657	57	0	4	53	A	missense_variant	MODERATE	clec-31	WBGene00009854	transcript	F49A5.2	protein_coding
V	16857726	C	[A]	{A, C}	0.0526316	1	TRUE	FALSE	FALSE	0.100605	57	0	3	54	A	missense_variant	MODERATE	clec-31	WBGene00009854	transcript	F49A5.2	protein_coding
V	16857741	C	[T]	{C, T}	0.0701754	1	TRUE	FALSE	TRUE	0.131657	57	0	4	53	T	missense_variant	MODERATE	clec-31	WBGene00009854	transcript	F49A5.2	protein_coding
V	16857744	G	[T]	{G, T}	0.157895	1	TRUE	FALSE	FALSE	0.268281	57	0	9	48	T	missense_variant	MODERATE	clec-31	WBGene00009854	transcript	F49A5.2	protein_coding
V	16857783	G	[C]	{G, C}	0.22807	1	TRUE	FALSE	FALSE	0.355224	57	0	13	44	C	missense_variant	MODERATE	clec-31	WBGene00009854	transcript	F49A5.2	protein_coding
V	16857791	C	[G]	{G, C}	0.22807	1	TRUE	FALSE	FALSE	0.355224	57	0	13	44	G	missense_variant	MODERATE	clec-31	WBGene00009854	transcript	F49A5.2	protein_coding
V	16857803	G	[A]	{G, A}	0.157895	1	TRUE	FALSE	TRUE	0.268281	57	0	9	48	A	missense_variant	MODERATE	clec-31	WBGene00009854	transcript	F49A5.2	protein_coding
V	16857809	G	[A]	{G, A}	0.0701754	1	TRUE	FALSE	TRUE	0.131657	57	0	4	53	A	missense_variant	MODERATE	clec-31	WBGene00009854	transcript	F49A5.2	protein_coding
V	16857812	T	[G]	{G, T}	0.22807	1	TRUE	FALSE	FALSE	0.355224	57	0	13	44	G	missense_variant	MODERATE	clec-31	WBGene00009854	transcript	F49A5.2	protein_coding
V	16857891	G	[A]	{G, A}	0.0701754	1	TRUE	FALSE	TRUE	0.131657	57	0	4	53	A	missense_variant	MODERATE	clec-31	WBGene00009854	transcript	F49A5.2	protein_coding
V	16857895	T	[A]	{A, T}	0.157895	1	TRUE	FALSE	FALSE	0.268281	57	0	9	48	A	missense_variant	MODERATE	clec-31	WBGene00009854	transcript	F49A5.2	protein_coding
V	16857897	G	[A]	{G, A}	0.0175439	1	TRUE	FALSE	TRUE	0.0347772	57	0	1	56	A	missense_variant	MODERATE	clec-31	WBGene00009854	transcript	F49A5.2	protein_coding
V	16857921	C	[T]	{C, T}	0.22807	1	TRUE	FALSE	TRUE	0.355224	57	0	13	44	T	missense_variant	MODERATE	clec-31	WBGene00009854	transcript	F49A5.2	protein_coding
V	16857925	G	[T]	{G, T}	0.22807	1	TRUE	FALSE	FALSE	0.355224	57	0	13	44	T	missense_variant	MODERATE	clec-31	WBGene00009854	transcript	F49A5.2	protein_coding
V	16857932	G	[T]	{G, T}	0.157895	1	TRUE	FALSE	FALSE	0.268281	57	0	9	48	T	missense_variant	MODERATE	clec-31	WBGene00009854	transcript	F49A5.2	protein_coding
V	16857933	T	[C]	{C, T}	0.157895	1	TRUE	FALSE	TRUE	0.268281	57	0	9	48	C	missense_variant	MODERATE	clec-31	WBGene00009854	transcript	F49A5.2	protein_coding
V	16857935	A	[C]	{A, C}	0.0701754	1	TRUE	FALSE	FALSE	0.131657	57	0	4	53	C	missense_variant	MODERATE	clec-31	WBGene00009854	transcript	F49A5.2	protein_coding
V	16857937	G	[T]	{G, T}	0.0701754	1	TRUE	FALSE	FALSE	0.131657	57	0	4	53	T	missense_variant	MODERATE	clec-31	WBGene00009854	transcript	F49A5.2	protein_coding
V	16857943	C	[T]	{C, T}	0.0701754	1	TRUE	FALSE	TRUE	0.131657	57	0	4	53	T	missense_variant	MODERATE	clec-31	WBGene00009854	transcript	F49A5.2	protein_coding
V	16858454	C	[T, A]	{A, C, T}	0.175439	1	TRUE	FALSE	FALSE	0.29188	57	0	10	47	A	missense_variant	MODERATE	clec-22	WBGene00009855	transcript	F49A5.3	protein_coding
V	16858470	G	[T]	{G, T}	0.0175439	1	TRUE	FALSE	FALSE	0.0347772	57	0	1	56	T	missense_variant	MODERATE	clec-22	WBGene00009855	transcript	F49A5.3	protein_coding
V	16858471	C	[A]	{A, C}	0.157895	1	TRUE	FALSE	FALSE	0.268281	57	0	9	48	A	missense_variant	MODERATE	clec-22	WBGene00009855	transcript	F49A5.3	protein_coding
V	16858477	G	[A]	{G, A}	0.157895	1	TRUE	FALSE	TRUE	0.268281	57	0	9	48	A	missense_variant	MODERATE	clec-22	WBGene00009855	transcript	F49A5.3	protein_coding
V	16858481	T	[C]	{C, T}	0.0175439	1	TRUE	FALSE	TRUE	0.0347772	57	0	1	56	C	missense_variant	MODERATE	clec-22	WBGene00009855	transcript	F49A5.3	protein_coding
V	16858490	G	[C]	{G, C}	0.0175439	1	TRUE	FALSE	FALSE	0.0347772	57	0	1	56	C	missense_variant	MODERATE	clec-22	WBGene00009855	transcript	F49A5.3	protein_coding
V	16858492	T	[C]	{C, T}	0.0175439	1	TRUE	FALSE	TRUE	0.0347772	57	0	1	56	C	missense_variant	MODERATE	clec-22	WBGene00009855	transcript	F49A5.3	protein_coding
V	16858501	T	[A, C]	{A, T}	0.0175439	1	TRUE	FALSE	FALSE	0.0347772	57	0	1	56	A	missense_variant	MODERATE	clec-22	WBGene00009855	transcript	F49A5.3	protein_coding
V	16858522	T	[C]	{C, T}	0.175439	1	TRUE	FALSE	TRUE	0.29188	57	0	10	47	C	missense_variant	MODERATE	clec-22	WBGene00009855	transcript	F49A5.3	protein_coding
V	16858531	A	[G]	{G, A}	0.157895	1	TRUE	FALSE	TRUE	0.268281	57	0	9	48	G	missense_variant	MODERATE	clec-22	WBGene00009855	transcript	F49A5.3	protein_coding
V	16858562	T	[G]	{G, T}	0.157895	1	TRUE	FALSE	FALSE	0.268281	57	0	9	48	G	missense_variant	MODERATE	clec-22	WBGene00009855	transcript	F49A5.3	protein_coding
V	16858571	C	[T]	{C, T}	0.0357143	0.982456	TRUE	FALSE	TRUE	0.0694981	56	0	2	54	T	missense_variant	MODERATE	clec-22	WBGene00009855	transcript	F49A5.3	protein_coding
V	16858608	A	[C]	{A, C}	0.157895	1	TRUE	FALSE	FALSE	0.268281	57	0	9	48	C	missense_variant	MODERATE	clec-22	WBGene00009855	transcript	F49A5.3	protein_coding
V	16858610	A	[C, G]	{A, C}	0.0175439	1	TRUE	FALSE	FALSE	0.0347772	57	0	1	56	C	missense_variant	MODERATE	clec-22	WBGene00009855	transcript	F49A5.3	protein_coding
V	16858611	C	[A]	{A, C}	0.175439	1	TRUE	FALSE	FALSE	0.29188	57	0	10	47	A	missense_variant	MODERATE	clec-22	WBGene00009855	transcript	F49A5.3	protein_coding
V	16858620	A	[T]	{A, T}	0.157895	1	TRUE	FALSE	FALSE	0.268281	57	0	9	48	T	missense_variant	MODERATE	clec-22	WBGene00009855	transcript	F49A5.3	protein_coding
V	16858621	G	[A]	{G, A}	0.0175439	1	TRUE	FALSE	TRUE	0.0347772	57	0	1	56	A	missense_variant	MODERATE	clec-22	WBGene00009855	transcript	F49A5.3	protein_coding
V	16858622	C	[A]	{A, C}	0.0175439	1	TRUE	FALSE	FALSE	0.0347772	57	0	1	56	A	missense_variant&splice_region_variant	MODERATE	clec-22	WBGene00009855	transcript	F49A5.3	protein_coding
V	16858677	A	[G, T]	{G, A, T}	0.175439	1	TRUE	FALSE	FALSE	0.29188	57	0	10	47	G	missense_variant	MODERATE	clec-22	WBGene00009855	transcript	F49A5.3	protein_coding
V	16858693	A	[C]	{A, C}	0.175439	1	TRUE	FALSE	FALSE	0.29188	57	0	10	47	C	missense_variant	MODERATE	clec-22	WBGene00009855	transcript	F49A5.3	protein_coding
V	16858713	G	[A]	{G, A}	0.0175439	1	TRUE	FALSE	TRUE	0.0347772	57	0	1	56	A	missense_variant	MODERATE	clec-22	WBGene00009855	transcript	F49A5.3	protein_coding
V	16858718	T	[G]	{G, T}	0.175439	1	TRUE	FALSE	FALSE	0.29188	57	0	10	47	G	missense_variant	MODERATE	clec-22	WBGene00009855	transcript	F49A5.3	protein_coding
V	16859067	A	[C, G]	{G, A, C}	0.0350877	1	TRUE	FALSE	FALSE	0.0683124	57	0	2	55	C	missense_variant	MODERATE	clec-22	WBGene00009855	transcript	F49A5.3	protein_coding
V	16859104	T	[G, C]	{G, T}	0.210526	1	TRUE	FALSE	FALSE	0.335352	57	0	12	45	G	missense_variant	MODERATE	clec-22	WBGene00009855	transcript	F49A5.3	protein_coding
V	16859106	T	[C]	{C, T}	0.0701754	1	TRUE	FALSE	TRUE	0.131657	57	0	4	53	C	missense_variant	MODERATE	clec-22	WBGene00009855	transcript	F49A5.3	protein_coding
V	16859112	G	[A]	{G, A}	0.157895	1	TRUE	FALSE	TRUE	0.268281	57	0	9	48	A	missense_variant	MODERATE	clec-22	WBGene00009855	transcript	F49A5.3	protein_coding
V	16859115	C	[T]	{C, T}	0.157895	1	TRUE	FALSE	TRUE	0.268281	57	0	9	48	T	missense_variant	MODERATE	clec-22	WBGene00009855	transcript	F49A5.3	protein_coding
V	16859119	G	[T]	{G, T}	0.157895	1	TRUE	FALSE	FALSE	0.268281	57	0	9	48	T	missense_variant	MODERATE	clec-22	WBGene00009855	transcript	F49A5.3	protein_coding
V	16859126	G	[T]	{G, T}	0.0526316	1	TRUE	FALSE	FALSE	0.100605	57	0	3	54	T	missense_variant	MODERATE	clec-22	WBGene00009855	transcript	F49A5.3	protein_coding
V	16859129	G	[A]	{G, A}	0.0701754	1	TRUE	FALSE	TRUE	0.131657	57	0	4	53	A	missense_variant	MODERATE	clec-22	WBGene00009855	transcript	F49A5.3	protein_coding
V	16859135	G	[A]	{G, A}	0.0175439	1	TRUE	FALSE	TRUE	0.0347772	57	0	1	56	A	missense_variant	MODERATE	clec-22	WBGene00009855	transcript	F49A5.3	protein_coding
V	16859145	G	[C]	{G, C}	0.0701754	1	TRUE	FALSE	FALSE	0.131657	57	0	4	53	C	missense_variant	MODERATE	clec-22	WBGene00009855	transcript	F49A5.3	protein_coding
V	16859153	C	[T]	{C, T}	0.0877193	1	TRUE	FALSE	TRUE	0.161466	57	0	5	52	T	missense_variant	MODERATE	clec-22	WBGene00009855	transcript	F49A5.3	protein_coding
V	16859157	A	[G]	{G, A}	0.22807	1	TRUE	FALSE	TRUE	0.355224	57	0	13	44	G	missense_variant	MODERATE	clec-22	WBGene00009855	transcript	F49A5.3	protein_coding
V	16859158	C	[T, A]	{A, C, T}	0.0701754	1	TRUE	FALSE	FALSE	0.131657	57	0	4	53	A	missense_variant	MODERATE	clec-22	WBGene00009855	transcript	F49A5.3	protein_coding
V	16859168	C	[A]	{A, C}	0.140351	1	TRUE	FALSE	FALSE	0.24344	57	0	8	49	A	missense_variant	MODERATE	clec-22	WBGene00009855	transcript	F49A5.3	protein_coding
V	16859250	C	[T]	{C, T}	0.368421	1	TRUE	FALSE	TRUE	0.469492	57	0	21	36	T	missense_variant	MODERATE	clec-22	WBGene00009855	transcript	F49A5.3	protein_coding
V	16859261	G	[T]	{G, T}	0.140351	1	TRUE	FALSE	FALSE	0.24344	57	0	8	49	T	missense_variant	MODERATE	clec-22	WBGene00009855	transcript	F49A5.3	protein_coding
V	16859267	G	[A]	{G, A}	0.0877193	1	TRUE	FALSE	TRUE	0.161466	57	0	5	52	A	missense_variant	MODERATE	clec-22	WBGene00009855	transcript	F49A5.3	protein_coding
V	16859273	A	[C]	{A, C}	0.140351	1	TRUE	FALSE	FALSE	0.24344	57	0	8	49	C	missense_variant	MODERATE	clec-22	WBGene00009855	transcript	F49A5.3	protein_coding
V	16859279	G	[A]	{G, A}	0.140351	1	TRUE	FALSE	TRUE	0.24344	57	0	8	49	A	missense_variant	MODERATE	clec-22	WBGene00009855	transcript	F49A5.3	protein_coding
V	16859281	T	[A]	{A, T}	0.140351	1	TRUE	FALSE	FALSE	0.24344	57	0	8	49	A	missense_variant	MODERATE	clec-22	WBGene00009855	transcript	F49A5.3	protein_coding
V	16859346	G	[A]	{G, A}	0.0877193	1	TRUE	FALSE	TRUE	0.161466	57	0	5	52	A	missense_variant	MODERATE	clec-22	WBGene00009855	transcript	F49A5.3	protein_coding
V	16859427	A	[G]	{G, A}	0.0526316	1	TRUE	FALSE	TRUE	0.100605	57	0	3	54	G	missense_variant	MODERATE	clec-22	WBGene00009855	transcript	F49A5.3	protein_coding
V	16859440	G	[C]	{G, C}	0.0175439	1	TRUE	FALSE	FALSE	0.0347772	57	0	1	56	C	missense_variant	MODERATE	clec-22	WBGene00009855	transcript	F49A5.3	protein_coding
V	16859475	C	[A]	{A, C}	0.0877193	1	TRUE	FALSE	FALSE	0.161466	57	0	5	52	A	missense_variant	MODERATE	clec-22	WBGene00009855	transcript	F49A5.3	protein_coding
V	16859481	C	[T]	{C, T}	0.175439	1	TRUE	FALSE	TRUE	0.29188	57	0	10	47	T	missense_variant	MODERATE	clec-22	WBGene00009855	transcript	F49A5.3	protein_coding
V	16859486	A	[C]	{A, C}	0.22807	1	TRUE	FALSE	FALSE	0.355224	57	0	13	44	C	missense_variant	MODERATE	clec-22	WBGene00009855	transcript	F49A5.3	protein_coding
V	16859488	C	[A]	{A, C}	0.22807	1	TRUE	FALSE	FALSE	0.355224	57	0	13	44	A	missense_variant	MODERATE	clec-22	WBGene00009855	transcript	F49A5.3	protein_coding
V	16859492	G	[A]	{G, A}	0.0877193	1	TRUE	FALSE	TRUE	0.161466	57	0	5	52	A	missense_variant	MODERATE	clec-22	WBGene00009855	transcript	F49A5.3	protein_coding
V	16859496	A	[G]	{G, A}	0.45614	1	TRUE	FALSE	TRUE	0.500543	57	0	26	31	G	missense_variant	MODERATE	clec-22	WBGene00009855	transcript	F49A5.3	protein_coding
V	16859546	G	[A]	{G, A}	0.22807	1	TRUE	FALSE	TRUE	0.355224	57	0	13	44	A	missense_variant	MODERATE	clec-22	WBGene00009855	transcript	F49A5.3	protein_coding
V	16859675	A	[G]	{G, A}	0.157895	1	TRUE	FALSE	TRUE	0.268281	57	0	9	48	G	missense_variant&splice_region_variant	MODERATE	clec-22	WBGene00009855	transcript	F49A5.3	protein_coding
V	16859696	G	[A]	{G, A}	0.140351	1	TRUE	FALSE	TRUE	0.24344	57	0	8	49	A	missense_variant	MODERATE	clec-22	WBGene00009855	transcript	F49A5.3	protein_coding
V	16859698	A	[C]	{A, C}	0.22807	1	TRUE	FALSE	FALSE	0.355224	57	0	13	44	C	missense_variant	MODERATE	clec-22	WBGene00009855	transcript	F49A5.3	protein_coding
V	16859702	T	[A]	{A, T}	0.0877193	1	TRUE	FALSE	FALSE	0.161466	57	0	5	52	A	missense_variant	MODERATE	clec-22	WBGene00009855	transcript	F49A5.3	protein_coding
V	16859711	A	[T]	{A, T}	0.0877193	1	TRUE	FALSE	FALSE	0.161466	57	0	5	52	T	missense_variant	MODERATE	clec-22	WBGene00009855	transcript	F49A5.3	protein_coding
V	16859712	C	[T]	{C, T}	0.210526	1	TRUE	FALSE	TRUE	0.335352	57	0	12	45	T	missense_variant	MODERATE	clec-22	WBGene00009855	transcript	F49A5.3	protein_coding
V	16859720	A	[G]	{G, A}	0.0877193	1	TRUE	FALSE	TRUE	0.161466	57	0	5	52	G	missense_variant	MODERATE	clec-22	WBGene00009855	transcript	F49A5.3	protein_coding
V	16859726	T	[A, C]	{A, C, T}	0.22807	1	TRUE	FALSE	FALSE	0.355224	57	0	13	44	A	missense_variant	MODERATE	clec-22	WBGene00009855	transcript	F49A5.3	protein_coding
V	16859729	G	[A]	{G, A}	0.350877	1	TRUE	FALSE	TRUE	0.459556	57	0	20	37	A	missense_variant	MODERATE	clec-22	WBGene00009855	transcript	F49A5.3	protein_coding
V	16859739	G	[A]	{G, A}	0.0877193	1	TRUE	FALSE	TRUE	0.161466	57	0	5	52	A	missense_variant	MODERATE	clec-22	WBGene00009855	transcript	F49A5.3	protein_coding
V	16859762	T	[G]	{G, T}	0.0877193	1	TRUE	FALSE	FALSE	0.161466	57	0	5	52	G	missense_variant	MODERATE	clec-22	WBGene00009855	transcript	F49A5.3	protein_coding
V	16859780	A	[C, G]	{G, A}	0.0877193	1	TRUE	FALSE	FALSE	0.161466	57	0	5	52	C	missense_variant	MODERATE	clec-22	WBGene00009855	transcript	F49A5.3	protein_coding
V	16859813	C	[G, T]	{G, C}	0.22807	1	TRUE	FALSE	FALSE	0.355224	57	0	13	44	G	missense_variant	MODERATE	clec-22	WBGene00009855	transcript	F49A5.3	protein_coding
V	16859816	G	[A]	{G, A}	0.22807	1	TRUE	FALSE	TRUE	0.355224	57	0	13	44	A	missense_variant	MODERATE	clec-22	WBGene00009855	transcript	F49A5.3	protein_coding
V	16859831	T	[A]	{A, T}	0.140351	1	TRUE	FALSE	FALSE	0.24344	57	0	8	49	A	missense_variant	MODERATE	clec-22	WBGene00009855	transcript	F49A5.3	protein_coding
V	16859847	T	[C]	{C, T}	0.0350877	1	TRUE	FALSE	TRUE	0.0683124	57	0	2	55	C	missense_variant	MODERATE	clec-22	WBGene00009855	transcript	F49A5.3	protein_coding
V	16859906	A	[C]	{A, C}	0.22807	1	TRUE	FALSE	FALSE	0.355224	57	0	13	44	C	missense_variant	MODERATE	clec-22	WBGene00009855	transcript	F49A5.3	protein_coding
V	16859913	T	[A]	{A, T}	0.0175439	1	TRUE	FALSE	FALSE	0.0347772	57	0	1	56	A	missense_variant	MODERATE	clec-22	WBGene00009855	transcript	F49A5.3	protein_coding
V	16859923	A	[G]	{G, A}	0.140351	1	TRUE	FALSE	TRUE	0.24344	57	0	8	49	G	missense_variant	MODERATE	clec-22	WBGene00009855	transcript	F49A5.3	protein_coding
V	16859925	T	[C]	{C, T}	0.22807	1	TRUE	FALSE	TRUE	0.355224	57	0	13	44	C	missense_variant	MODERATE	clec-22	WBGene00009855	transcript	F49A5.3	protein_coding
V	16859945	C	[T]	{C, T}	0.0877193	1	TRUE	FALSE	TRUE	0.161466	57	0	5	52	T	missense_variant	MODERATE	clec-22	WBGene00009855	transcript	F49A5.3	protein_coding
V	16860003	C	[T]	{C, T}	0.140351	1	TRUE	FALSE	TRUE	0.24344	57	0	8	49	T	missense_variant	MODERATE	clec-22	WBGene00009855	transcript	F49A5.3	protein_coding
V	16860009	T	[A]	{A, T}	0.0350877	1	TRUE	FALSE	FALSE	0.0683124	57	0	2	55	A	missense_variant	MODERATE	clec-22	WBGene00009855	transcript	F49A5.3	protein_coding
V	16860288	A	[T]	{A, T}	0.0877193	1	TRUE	FALSE	FALSE	0.161466	57	0	5	52	T	missense_variant	MODERATE	clec-32	WBGene00009860	transcript	F49A5.9	protein_coding
V	16860338	G	[A]	{G, A}	0.0701754	1	TRUE	FALSE	TRUE	0.131657	57	0	4	53	A	missense_variant	MODERATE	clec-32	WBGene00009860	transcript	F49A5.9	protein_coding
V	16860356	A	[G]	{G, A}	0.0701754	1	TRUE	FALSE	TRUE	0.131657	57	0	4	53	G	missense_variant	MODERATE	clec-32	WBGene00009860	transcript	F49A5.9	protein_coding
V	16860470	C	[T]	{C, T}	0.0877193	1	TRUE	FALSE	TRUE	0.161466	57	0	5	52	T	missense_variant	MODERATE	clec-32	WBGene00009860	transcript	F49A5.9	protein_coding
V	16860511	C	[G]	{G, C}	0.0877193	1	TRUE	FALSE	FALSE	0.161466	57	0	5	52	G	missense_variant	MODERATE	clec-32	WBGene00009860	transcript	F49A5.9	protein_coding
V	16860539	T	[C]	{C, T}	0.0877193	1	TRUE	FALSE	TRUE	0.161466	57	0	5	52	C	missense_variant	MODERATE	clec-32	WBGene00009860	transcript	F49A5.9	protein_coding
V	16860540	T	[G]	{G, T}	0.0877193	1	TRUE	FALSE	FALSE	0.161466	57	0	5	52	G	missense_variant	MODERATE	clec-32	WBGene00009860	transcript	F49A5.9	protein_coding
V	16860602	A	[T]	{A, T}	0.0877193	1	TRUE	FALSE	FALSE	0.161466	57	0	5	52	T	missense_variant	MODERATE	clec-32	WBGene00009860	transcript	F49A5.9	protein_coding
V	16860608	T	[C]	{C, T}	0.0877193	1	TRUE	FALSE	TRUE	0.161466	57	0	5	52	C	missense_variant&splice_region_variant	MODERATE	clec-32	WBGene00009860	transcript	F49A5.9	protein_coding
V	16860876	T	[A, C]	{A, C, T}	0.0614035	1	TRUE	FALSE	FALSE	0.116286	57	3	2	52	C	missense_variant	MODERATE	clec-32	WBGene00009860	transcript	F49A5.9	protein_coding
V	16860878	T	[C]	{C, T}	0.0350877	1	TRUE	FALSE	TRUE	0.0683124	57	0	2	55	C	missense_variant	MODERATE	clec-32	WBGene00009860	transcript	F49A5.9	protein_coding
V	16860889	G	[T]	{G, T}	0.0350877	1	TRUE	FALSE	FALSE	0.0683124	57	0	2	55	T	missense_variant	MODERATE	clec-32	WBGene00009860	transcript	F49A5.9	protein_coding
V	16860892	G	[T, A]	{G, T}	0.0789474	1	TRUE	FALSE	FALSE	0.146716	57	1	4	52	A	missense_variant	MODERATE	clec-32	WBGene00009860	transcript	F49A5.9	protein_coding
V	16860901	G	[A]	{G, A}	0.0263158	1	TRUE	FALSE	TRUE	0.0517	57	1	1	55	A	missense_variant	MODERATE	clec-32	WBGene00009860	transcript	F49A5.9	protein_coding
V	16860929	A	[G, T]	{G, A, T}	0.0526316	1	TRUE	FALSE	FALSE	0.100605	57	2	2	53	G	missense_variant	MODERATE	clec-32	WBGene00009860	transcript	F49A5.9	protein_coding
V	16860938	T	[C]	{C, T}	0.0877193	1	TRUE	FALSE	TRUE	0.161466	57	0	5	52	C	missense_variant	MODERATE	clec-32	WBGene00009860	transcript	F49A5.9	protein_coding
V	16860954	C	[G]	{G, C}	0.0526316	1	TRUE	FALSE	FALSE	0.100605	57	0	3	54	G	missense_variant	MODERATE	clec-32	WBGene00009860	transcript	F49A5.9	protein_coding
V	16861121	T	[C]	{C, T}	0.0701754	1	TRUE	FALSE	TRUE	0.131657	57	0	4	53	C	missense_variant	MODERATE	clec-32	WBGene00009860	transcript	F49A5.9	protein_coding
V	16861145	C	[T]	{C, T}	0.0877193	1	TRUE	FALSE	TRUE	0.161466	57	0	5	52	T	missense_variant	MODERATE	clec-32	WBGene00009860	transcript	F49A5.9	protein_coding
V	16861162	A	[T]	{A, T}	0.0175439	1	TRUE	FALSE	FALSE	0.0347772	57	0	1	56	T	missense_variant	MODERATE	clec-32	WBGene00009860	transcript	F49A5.9	protein_coding
V	16861167	A	[C]	{A, C}	0.0877193	1	TRUE	FALSE	FALSE	0.161466	57	0	5	52	C	missense_variant	MODERATE	clec-32	WBGene00009860	transcript	F49A5.9	protein_coding
V	16861169	A	[G]	{G, A}	0.0877193	1	TRUE	FALSE	TRUE	0.161466	57	0	5	52	G	missense_variant	MODERATE	clec-32	WBGene00009860	transcript	F49A5.9	protein_coding
V	16861274	A	[G, T]	{G, A}	0.0877193	1	TRUE	FALSE	FALSE	0.161466	57	0	5	52	G	missense_variant	MODERATE	clec-32	WBGene00009860	transcript	F49A5.9	protein_coding
V	16861288	T	[G]	{G, T}	0.0877193	1	TRUE	FALSE	FALSE	0.161466	57	0	5	52	G	missense_variant	MODERATE	clec-32	WBGene00009860	transcript	F49A5.9	protein_coding
V	16861296	T	[C]	{C, T}	0.0877193	1	TRUE	FALSE	TRUE	0.161466	57	0	5	52	C	missense_variant	MODERATE	clec-32	WBGene00009860	transcript	F49A5.9	protein_coding
V	16861302	G	[A]	{G, A}	0.0350877	1	TRUE	FALSE	TRUE	0.0683124	57	0	2	55	A	missense_variant	MODERATE	clec-32	WBGene00009860	transcript	F49A5.9	protein_coding
V	16861323	A	[G]	{G, A}	0.0701754	1	TRUE	FALSE	TRUE	0.131657	57	0	4	53	G	missense_variant	MODERATE	clec-32	WBGene00009860	transcript	F49A5.9	protein_coding
V	16861340	G	[T]	{G, T}	0.0175439	1	TRUE	FALSE	FALSE	0.0347772	57	0	1	56	T	missense_variant	MODERATE	clec-32	WBGene00009860	transcript	F49A5.9	protein_coding
V	16861376	G	[T]	{G, T}	0.0877193	1	TRUE	FALSE	FALSE	0.161466	57	0	5	52	T	missense_variant&splice_region_variant	MODERATE	clec-32	WBGene00009860	transcript	F49A5.9	protein_coding
V	16861458	G	[T]	{G, T}	0.150943	0.929825	TRUE	FALSE	FALSE	0.25876	53	0	8	45	T	missense_variant	MODERATE	clec-32	WBGene00009860	transcript	F49A5.9	protein_coding
V	16861529	C	[G, A]	{G, C}	0.0877193	1	TRUE	FALSE	FALSE	0.161466	57	0	5	52	A	missense_variant	MODERATE	clec-32	WBGene00009860	transcript	F49A5.9	protein_coding
V	16861543	C	[A]	{A, C}	0.0877193	1	TRUE	FALSE	FALSE	0.161466	57	0	5	52	A	missense_variant	MODERATE	clec-32	WBGene00009860	transcript	F49A5.9	protein_coding
V	16861556	G	[A]	{G, A}	0.0350877	1	TRUE	FALSE	TRUE	0.0683124	57	0	2	55	A	missense_variant	MODERATE	clec-32	WBGene00009860	transcript	F49A5.9	protein_coding
V	16861568	T	[A]	{A, T}	0.0175439	1	TRUE	FALSE	FALSE	0.0347772	57	0	1	56	A	missense_variant	MODERATE	clec-32	WBGene00009860	transcript	F49A5.9	protein_coding
V	16861577	T	[C]	{C, T}	0.0877193	1	TRUE	FALSE	TRUE	0.161466	57	0	5	52	C	missense_variant&splice_region_variant	MODERATE	clec-32	WBGene00009860	transcript	F49A5.9	protein_coding
V	16861638	C	[T, G]	{C, T}	0.0377358	0.929825	TRUE	FALSE	FALSE	0.0733154	53	0	2	51	G	missense_variant	MODERATE	clec-32	WBGene00009860	transcript	F49A5.9	protein_coding
V	16861724	C	[G]	{G, C}	0.0877193	1	TRUE	FALSE	FALSE	0.161466	57	0	5	52	G	missense_variant	MODERATE	clec-32	WBGene00009860	transcript	F49A5.9	protein_coding
V	16861753	T	[C]	{C, T}	0.0877193	1	TRUE	FALSE	TRUE	0.161466	57	0	5	52	C	missense_variant	MODERATE	clec-32	WBGene00009860	transcript	F49A5.9	protein_coding
V	16861758	C	[T]	{C, T}	0.0877193	1	TRUE	FALSE	TRUE	0.161466	57	0	5	52	T	missense_variant	MODERATE	clec-32	WBGene00009860	transcript	F49A5.9	protein_coding
V	16861787	G	[T, A]	{G, T}	0.0877193	1	TRUE	FALSE	FALSE	0.161466	57	0	5	52	T	missense_variant	MODERATE	clec-32	WBGene00009860	transcript	F49A5.9	protein_coding
V	16861806	T	[A]	{A, T}	0.0175439	1	TRUE	FALSE	FALSE	0.0347772	57	0	1	56	A	missense_variant	MODERATE	clec-32	WBGene00009860	transcript	F49A5.9	protein_coding
V	16861813	C	[T]	{C, T}	0.0877193	1	TRUE	FALSE	TRUE	0.161466	57	0	5	52	T	missense_variant	MODERATE	clec-32	WBGene00009860	transcript	F49A5.9	protein_coding
V	16862025	T	[A]	{A, T}	0.122807	1	TRUE	FALSE	FALSE	0.217358	57	0	7	50	A	missense_variant	MODERATE	clec-24	WBGene00009856	transcript	F49A5.4b	protein_coding
V	16862031	A	[C]	{A, C}	0.0350877	1	TRUE	FALSE	FALSE	0.0683124	57	0	2	55	C	missense_variant	MODERATE	clec-24	WBGene00009856	transcript	F49A5.4b	protein_coding
V	16862173	C	[T]	{C, T}	0.122807	1	TRUE	FALSE	TRUE	0.217358	57	0	7	50	T	missense_variant	MODERATE	clec-24	WBGene00009856	transcript	F49A5.4b	protein_coding
V	16862203	A	[G]	{G, A}	0.122807	1	TRUE	FALSE	TRUE	0.217358	57	0	7	50	G	missense_variant	MODERATE	clec-24	WBGene00009856	transcript	F49A5.4b	protein_coding
V	16862211	A	[G]	{G, A}	0.122807	1	TRUE	FALSE	TRUE	0.217358	57	0	7	50	G	missense_variant	MODERATE	clec-24	WBGene00009856	transcript	F49A5.4b	protein_coding
V	16862235	C	[T]	{C, T}	0.122807	1	TRUE	FALSE	TRUE	0.217358	57	0	7	50	T	missense_variant	MODERATE	clec-24	WBGene00009856	transcript	F49A5.4b	protein_coding
V	16862246	C	[G]	{G, C}	0.122807	1	TRUE	FALSE	FALSE	0.217358	57	0	7	50	G	missense_variant	MODERATE	clec-24	WBGene00009856	transcript	F49A5.4b	protein_coding
V	16862247	A	[G]	{G, A}	0.122807	1	TRUE	FALSE	TRUE	0.217358	57	0	7	50	G	missense_variant	MODERATE	clec-24	WBGene00009856	transcript	F49A5.4b	protein_coding
V	16862304	C	[T]	{C, T}	0.122807	1	TRUE	FALSE	TRUE	0.217358	57	0	7	50	T	missense_variant	MODERATE	clec-24	WBGene00009856	transcript	F49A5.4b	protein_coding
V	16862369	G	[T]	{G, T}	0.122807	1	TRUE	FALSE	FALSE	0.217358	57	0	7	50	T	missense_variant	MODERATE	clec-24	WBGene00009856	transcript	F49A5.4b	protein_coding
V	16862481	T	[A]	{A, T}	0.140351	1	TRUE	FALSE	FALSE	0.24344	57	0	8	49	A	missense_variant	MODERATE	clec-24	WBGene00009856	transcript	F49A5.4b	protein_coding
V	16862485	G	[A]	{G, A}	0.0526316	1	TRUE	FALSE	TRUE	0.100605	57	0	3	54	A	missense_variant	MODERATE	clec-24	WBGene00009856	transcript	F49A5.4b	protein_coding
V	16862502	C	[G]	{G, C}	0.140351	1	TRUE	FALSE	FALSE	0.24344	57	0	8	49	G	missense_variant&splice_region_variant	MODERATE	clec-24	WBGene00009856	transcript	F49A5.4b	protein_coding
V	16862564	C	[T]	{C, T}	0.140351	1	TRUE	FALSE	TRUE	0.24344	57	0	8	49	T	missense_variant	MODERATE	clec-24	WBGene00009856	transcript	F49A5.4b	protein_coding
V	16862582	T	[A]	{A, T}	0.140351	1	TRUE	FALSE	FALSE	0.24344	57	0	8	49	A	missense_variant	MODERATE	clec-24	WBGene00009856	transcript	F49A5.4b	protein_coding
V	16862720	T	[C, G]	{G, C, T}	0.114035	1	TRUE	FALSE	FALSE	0.20385	57	3	5	49	C	missense_variant&splice_region_variant	MODERATE	clec-24	WBGene00009856	transcript	F49A5.4b	protein_coding
V	16862751	C	[T]	{C, T}	0.122807	1	TRUE	FALSE	TRUE	0.217358	57	2	6	49	T	missense_variant	MODERATE	clec-24	WBGene00009856	transcript	F49A5.4b	protein_coding
V	16862786	G	[A]	{G, A}	0.140351	1	TRUE	FALSE	TRUE	0.24344	57	0	8	49	A	missense_variant	MODERATE	clec-24	WBGene00009856	transcript	F49A5.4b	protein_coding
V	16862925	T	[G]	{G, T}	0.45614	1	TRUE	FALSE	FALSE	0.500543	57	0	26	31	G	missense_variant	MODERATE	clec-24	WBGene00009856	transcript	F49A5.4b	protein_coding
V	16862928	A	[C]	{A, C}	0.0526316	1	TRUE	FALSE	FALSE	0.100605	57	0	3	54	C	missense_variant	MODERATE	clec-24	WBGene00009856	transcript	F49A5.4b	protein_coding
V	16862967	G	[A]	{G, A}	0.0877193	1	TRUE	FALSE	TRUE	0.161466	57	0	5	52	A	missense_variant	MODERATE	clec-24	WBGene00009856	transcript	F49A5.4b	protein_coding
V	16863015	C	[A, T]	{A, C}	0.175439	1	TRUE	FALSE	FALSE	0.29188	57	0	10	47	A	missense_variant	MODERATE	clec-24	WBGene00009856	transcript	F49A5.4b	protein_coding
V	16863037	T	[C]	{C, T}	0.0526316	1	TRUE	FALSE	TRUE	0.100605	57	0	3	54	C	missense_variant	MODERATE	clec-24	WBGene00009856	transcript	F49A5.4b	protein_coding
V	16863044	T	[G, C]	{G, C, T}	0.0701754	1	TRUE	FALSE	FALSE	0.131657	57	0	4	53	G	missense_variant	MODERATE	clec-24	WBGene00009856	transcript	F49A5.4b	protein_coding
V	16863546	G	[C]	{G, C}	0.0175439	1	TRUE	FALSE	FALSE	0.0347772	57	0	1	56	C	missense_variant	MODERATE	clec-24	WBGene00009856	transcript	F49A5.4b	protein_coding
V	16866691	T	[A]	{A, T}	0.0526316	1	TRUE	FALSE	FALSE	0.100605	57	0	3	54	A	missense_variant&splice_region_variant	MODERATE	clec-28	WBGene00009857	transcript	F49A5.5a	protein_coding
V	16867028	G	[T]	{G, T}	0.0263158	1	TRUE	FALSE	FALSE	0.0517	57	1	1	55	T	missense_variant	MODERATE	clec-28	WBGene00009857	transcript	F49A5.5a	protein_coding
V	16867986	A	[G]	{G, A}	0.0175439	1	TRUE	FALSE	TRUE	0.0347772	57	0	1	56	G	missense_variant	MODERATE	clec-33	WBGene00009859	transcript	F49A5.7	protein_coding
V	16868592	T	[G]	{G, T}	0.0175439	1	TRUE	FALSE	FALSE	0.0347772	57	0	1	56	G	missense_variant	MODERATE	clec-33	WBGene00009859	transcript	F49A5.7	protein_coding
V	16868604	G	[A]	{G, A}	0.0526316	1	TRUE	FALSE	TRUE	0.100605	57	0	3	54	A	missense_variant	MODERATE	clec-33	WBGene00009859	transcript	F49A5.7	protein_coding
V	16868768	C	[T]	{C, T}	0.0350877	1	TRUE	FALSE	TRUE	0.0683124	57	0	2	55	T	missense_variant	MODERATE	clec-33	WBGene00009859	transcript	F49A5.7	protein_coding
V	16870788	G	[A]	{G, A}	0.0175439	1	TRUE	FALSE	TRUE	0.0347772	57	0	1	56	A	missense_variant	MODERATE	thn-4	WBGene00009858	transcript	F49A5.6	protein_coding
V	16870802	G	[T]	{G, T}	0.0526316	1	TRUE	FALSE	FALSE	0.100605	57	0	3	54	T	missense_variant	MODERATE	thn-4	WBGene00009858	transcript	F49A5.6	protein_coding
V	16871028	T	[C]	{C, T}	0.0350877	1	TRUE	FALSE	TRUE	0.0683124	57	0	2	55	C	missense_variant	MODERATE	thn-4	WBGene00009858	transcript	F49A5.6	protein_coding
V	16871034	C	[G]	{G, C}	0.0535714	0.982456	TRUE	FALSE	FALSE	0.102317	56	0	3	53	G	missense_variant	MODERATE	thn-4	WBGene00009858	transcript	F49A5.6	protein_coding
V	16871115	C	[T]	{C, T}	0.45614	1	TRUE	FALSE	TRUE	0.500543	57	0	26	31	T	missense_variant	MODERATE	thn-4	WBGene00009858	transcript	F49A5.6	protein_coding
V	16871265	C	[A]	{A, C}	0.0350877	1	TRUE	FALSE	FALSE	0.0683124	57	0	2	55	A	missense_variant	MODERATE	thn-4	WBGene00009858	transcript	F49A5.6	protein_coding
V	16871337	A	[G]	{G, A}	0.037037	0.947368	TRUE	FALSE	TRUE	0.0719972	54	0	2	52	G	missense_variant	MODERATE	thn-4	WBGene00009858	transcript	F49A5.6	protein_coding
V	16871399	A	[C]	{A, C}	0.0526316	1	TRUE	FALSE	FALSE	0.100605	57	0	3	54	C	missense_variant	MODERATE	thn-4	WBGene00009858	transcript	F49A5.6	protein_coding
V	16871403	G	[A]	{G, A}	0.0526316	1	TRUE	FALSE	TRUE	0.100605	57	0	3	54	A	missense_variant	MODERATE	thn-4	WBGene00009858	transcript	F49A5.6	protein_coding
V	16871463	C	[G, A]	{G, C}	0.0350877	1	TRUE	FALSE	FALSE	0.0683124	57	0	2	55	A	missense_variant	MODERATE	thn-4	WBGene00009858	transcript	F49A5.6	protein_coding
V	16874003	T	[C]	{C, T}	0.0350877	1	TRUE	FALSE	TRUE	0.0683124	57	0	2	55	C	missense_variant	MODERATE	srw-23	WBGene00005770	transcript	F49A5.8	protein_coding
V	16874213	GCCT	[G]	{GCCT, G}	0.0350877	1	FALSE	TRUE	FALSE	0.0683124	57	0	2	55	G	conservative_inframe_deletion	MODERATE	srw-23	WBGene00005770	transcript	F49A5.8	protein_coding
V	16874215	CTCG	[C]	{CTCG, C}	0.315789	1	FALSE	TRUE	FALSE	0.435957	57	0	18	39	C	disruptive_inframe_deletion	MODERATE	srw-23	WBGene00005770	transcript	F49A5.8	protein_coding
V	16874329	G	[A]	{G, A}	0.140351	1	TRUE	FALSE	TRUE	0.24344	57	0	8	49	A	missense_variant	MODERATE	srw-23	WBGene00005770	transcript	F49A5.8	protein_coding
V	16874506	A	[C]	{A, C}	0.0350877	1	TRUE	FALSE	FALSE	0.0683124	57	0	2	55	C	missense_variant	MODERATE	srw-23	WBGene00005770	transcript	F49A5.8	protein_coding
V	16874832	C	[T]	{C, T}	0.0526316	1	TRUE	FALSE	TRUE	0.100605	57	0	3	54	T	missense_variant	MODERATE	srw-23	WBGene00005770	transcript	F49A5.8	protein_coding
V	16874860	G	[C]	{G, C}	0.0175439	1	TRUE	FALSE	FALSE	0.0347772	57	0	1	56	C	missense_variant	MODERATE	srw-23	WBGene00005770	transcript	F49A5.8	protein_coding
V	16874872	A	[G]	{G, A}	0.0701754	1	TRUE	FALSE	TRUE	0.131657	57	0	4	53	G	missense_variant	MODERATE	srw-23	WBGene00005770	transcript	F49A5.8	protein_coding
V	16874904	A	[T, G]	{A, T}	0.0701754	1	TRUE	FALSE	FALSE	0.131657	57	0	4	53	G	missense_variant	MODERATE	srw-23	WBGene00005770	transcript	F49A5.8	protein_coding
V	16874937	G	[A]	{G, A}	0.0350877	1	TRUE	FALSE	TRUE	0.0683124	57	0	2	55	A	missense_variant	MODERATE	srw-23	WBGene00005770	transcript	F49A5.8	protein_coding
V	16874952	A	[T]	{A, T}	0.0350877	1	TRUE	FALSE	FALSE	0.0683124	57	0	2	55	T	missense_variant	MODERATE	srw-23	WBGene00005770	transcript	F49A5.8	protein_coding
V	16874973	T	[G]	{G, T}	0.0526316	1	TRUE	FALSE	FALSE	0.100605	57	0	3	54	G	missense_variant	MODERATE	srw-23	WBGene00005770	transcript	F49A5.8	protein_coding
V	16875090	A	[G]	{G, A}	0.0175439	1	TRUE	FALSE	TRUE	0.0347772	57	0	1	56	G	missense_variant	MODERATE	srw-23	WBGene00005770	transcript	F49A5.8	protein_coding
V	16875106	T	[C]	{C, T}	0.0175439	1	TRUE	FALSE	TRUE	0.0347772	57	0	1	56	C	missense_variant	MODERATE	srw-23	WBGene00005770	transcript	F49A5.8	protein_coding
V	16875132	A	[G]	{G, A}	0.421053	1	TRUE	FALSE	TRUE	0.491849	57	0	24	33	G	missense_variant	MODERATE	srw-23	WBGene00005770	transcript	F49A5.8	protein_coding
V	16875139	A	[G]	{G, A}	0.192982	1	TRUE	FALSE	TRUE	0.314237	57	0	11	46	G	missense_variant	MODERATE	srw-23	WBGene00005770	transcript	F49A5.8	protein_coding
V	16875142	T	[A]	{A, T}	0.0175439	1	TRUE	FALSE	FALSE	0.0347772	57	0	1	56	A	missense_variant&splice_region_variant	MODERATE	srw-23	WBGene00005770	transcript	F49A5.8	protein_coding
V	16875243	C	[G]	{G, C}	0.421053	1	TRUE	FALSE	FALSE	0.491849	57	0	24	33	G	missense_variant	MODERATE	srw-23	WBGene00005770	transcript	F49A5.8	protein_coding
V	16875258	G	[T, C]	{G, T}	0.0350877	1	TRUE	FALSE	FALSE	0.0683124	57	0	2	55	C	missense_variant	MODERATE	srw-23	WBGene00005770	transcript	F49A5.8	protein_coding
V	16875279	T	[C]	{C, T}	0.0175439	1	TRUE	FALSE	TRUE	0.0347772	57	0	1	56	C	missense_variant	MODERATE	srw-23	WBGene00005770	transcript	F49A5.8	protein_coding
V	16875303	G	[A]	{G, A}	0.0175439	1	TRUE	FALSE	TRUE	0.0347772	57	0	1	56	A	missense_variant	MODERATE	srw-23	WBGene00005770	transcript	F49A5.8	protein_coding
V	16875310	T	[C]	{C, T}	0.0175439	1	TRUE	FALSE	TRUE	0.0347772	57	0	1	56	C	missense_variant	MODERATE	srw-23	WBGene00005770	transcript	F49A5.8	protein_coding
V	16875331	G	[A]	{G, A}	0.0175439	1	TRUE	FALSE	TRUE	0.0347772	57	0	1	56	A	missense_variant	MODERATE	srw-23	WBGene00005770	transcript	F49A5.8	protein_coding
V	16875399	G	[A]	{G, A}	0.0175439	1	TRUE	FALSE	TRUE	0.0347772	57	0	1	56	A	missense_variant	MODERATE	srw-23	WBGene00005770	transcript	F49A5.8	protein_coding
V	16875423	T	[G]	{G, T}	0.0175439	1	TRUE	FALSE	FALSE	0.0347772	57	0	1	56	G	missense_variant	MODERATE	srw-23	WBGene00005770	transcript	F49A5.8	protein_coding
V	16875889	T	[G]	{G, T}	0.0175439	1	TRUE	FALSE	FALSE	0.0347772	57	0	1	56	G	missense_variant	MODERATE	F49A5.10	WBGene00044195	transcript	F49A5.10	protein_coding
V	16875905	C	[A]	{A, C}	0.0175439	1	TRUE	FALSE	FALSE	0.0347772	57	0	1	56	A	missense_variant	MODERATE	F49A5.10	WBGene00044195	transcript	F49A5.10	protein_coding
V	16875911	T	[A]	{A, T}	0.0175439	1	TRUE	FALSE	FALSE	0.0347772	57	0	1	56	A	missense_variant	MODERATE	F49A5.10	WBGene00044195	transcript	F49A5.10	protein_coding
V	16875917	G	[T]	{G, T}	0.0175439	1	TRUE	FALSE	FALSE	0.0347772	57	0	1	56	T	missense_variant	MODERATE	F49A5.10	WBGene00044195	transcript	F49A5.10	protein_coding
V	16876035	G	[A]	{G, A}	0.45614	1	TRUE	FALSE	TRUE	0.500543	57	0	26	31	A	missense_variant	MODERATE	F49A5.10	WBGene00044195	transcript	F49A5.10	protein_coding
V	16876071	C	[T]	{C, T}	0.0175439	1	TRUE	FALSE	TRUE	0.0347772	57	0	1	56	T	missense_variant	MODERATE	F49A5.10	WBGene00044195	transcript	F49A5.10	protein_coding
V	16876140	T	[C]	{C, T}	0.0175439	1	TRUE	FALSE	TRUE	0.0347772	57	0	1	56	C	missense_variant	MODERATE	F49A5.10	WBGene00044195	transcript	F49A5.10	protein_coding
V	16878912	T	[G]	{G, T}	0.0526316	1	TRUE	FALSE	FALSE	0.100605	57	0	3	54	G	missense_variant&splice_region_variant	MODERATE	F09C6.3	WBGene00008617	transcript	F09C6.3	protein_coding
V	16878949	C	[T]	{C, T}	0.0175439	1	TRUE	FALSE	TRUE	0.0347772	57	0	1	56	T	missense_variant	MODERATE	F09C6.3	WBGene00008617	transcript	F09C6.3	protein_coding
V	16879006	CTCT	[C]	{C, CTCT}	0.0175439	1	FALSE	TRUE	FALSE	0.0347772	57	0	1	56	C	disruptive_inframe_deletion	MODERATE	F09C6.3	WBGene00008617	transcript	F09C6.3	protein_coding
V	16879016	C	[T]	{C, T}	0.0175439	1	TRUE	FALSE	TRUE	0.0347772	57	0	1	56	T	missense_variant	MODERATE	F09C6.3	WBGene00008617	transcript	F09C6.3	protein_coding
V	16879347	C	[T]	{C, T}	0.0178571	0.982456	TRUE	FALSE	TRUE	0.0353925	56	0	1	55	T	missense_variant	MODERATE	F09C6.3	WBGene00008617	transcript	F09C6.3	protein_coding
V	16879375	A	[G]	{G, A}	0.0178571	0.982456	TRUE	FALSE	TRUE	0.0353925	56	0	1	55	G	missense_variant	MODERATE	F09C6.3	WBGene00008617	transcript	F09C6.3	protein_coding
V	16879382	G	[T]	{G, T}	0.0357143	0.982456	TRUE	FALSE	FALSE	0.0694981	56	0	2	54	T	missense_variant	MODERATE	F09C6.3	WBGene00008617	transcript	F09C6.3	protein_coding
V	16879444	C	[G]	{G, C}	0.0178571	0.982456	TRUE	FALSE	FALSE	0.0353925	56	0	1	55	G	missense_variant	MODERATE	F09C6.3	WBGene00008617	transcript	F09C6.3	protein_coding
V	16879458	T	[C]	{C, T}	0.0178571	0.982456	TRUE	FALSE	TRUE	0.0353925	56	0	1	55	C	missense_variant	MODERATE	F09C6.3	WBGene00008617	transcript	F09C6.3	protein_coding
V	16879459	T	[G]	{G, T}	0.0178571	0.982456	TRUE	FALSE	FALSE	0.0353925	56	0	1	55	G	missense_variant	MODERATE	F09C6.3	WBGene00008617	transcript	F09C6.3	protein_coding
V	16879477	C	[T]	{C, T}	0.0178571	0.982456	TRUE	FALSE	TRUE	0.0353925	56	0	1	55	T	missense_variant	MODERATE	F09C6.3	WBGene00008617	transcript	F09C6.3	protein_coding
V	16879487	T	[A]	{A, T}	0.0178571	0.982456	TRUE	FALSE	FALSE	0.0353925	56	0	1	55	A	missense_variant	MODERATE	F09C6.3	WBGene00008617	transcript	F09C6.3	protein_coding
V	16879489	C	[T]	{C, T}	0.0178571	0.982456	TRUE	FALSE	TRUE	0.0353925	56	0	1	55	T	missense_variant	MODERATE	F09C6.3	WBGene00008617	transcript	F09C6.3	protein_coding
V	16879499	G	[T]	{G, T}	0.0178571	0.982456	TRUE	FALSE	FALSE	0.0353925	56	0	1	55	T	missense_variant	MODERATE	F09C6.3	WBGene00008617	transcript	F09C6.3	protein_coding
V	16879504	T	[G]	{G, T}	0.0178571	0.982456	TRUE	FALSE	FALSE	0.0353925	56	0	1	55	G	missense_variant	MODERATE	F09C6.3	WBGene00008617	transcript	F09C6.3	protein_coding
V	16879505	T	[C]	{C, T}	0.0178571	0.982456	TRUE	FALSE	TRUE	0.0353925	56	0	1	55	C	missense_variant	MODERATE	F09C6.3	WBGene00008617	transcript	F09C6.3	protein_coding
V	16879506	A	[C]	{A, C}	0.0178571	0.982456	TRUE	FALSE	FALSE	0.0353925	56	0	1	55	C	missense_variant	MODERATE	F09C6.3	WBGene00008617	transcript	F09C6.3	protein_coding
V	16879530	G	[T]	{G, T}	0.0178571	0.982456	TRUE	FALSE	FALSE	0.0353925	56	0	1	55	T	missense_variant	MODERATE	F09C6.3	WBGene00008617	transcript	F09C6.3	protein_coding
V	16879573	T	[C]	{C, T}	0.0178571	0.982456	TRUE	FALSE	TRUE	0.0353925	56	0	1	55	C	missense_variant	MODERATE	F09C6.3	WBGene00008617	transcript	F09C6.3	protein_coding
V	16879934	C	[T]	{C, T}	0.45614	1	TRUE	FALSE	TRUE	0.500543	57	0	26	31	T	missense_variant	MODERATE	F09C6.3	WBGene00008617	transcript	F09C6.3	protein_coding
V	16879943	T	[A]	{A, T}	0.438596	1	TRUE	FALSE	FALSE	0.496817	57	0	25	32	A	missense_variant	MODERATE	F09C6.3	WBGene00008617	transcript	F09C6.3	protein_coding
V	16879945	C	[T]	{C, T}	0.45614	1	TRUE	FALSE	TRUE	0.500543	57	0	26	31	T	missense_variant	MODERATE	F09C6.3	WBGene00008617	transcript	F09C6.3	protein_coding
V	16879973	C	[T, A]	{C, T}	0.0350877	1	TRUE	FALSE	FALSE	0.0683124	57	0	2	55	A	missense_variant	MODERATE	F09C6.3	WBGene00008617	transcript	F09C6.3	protein_coding
V	16880026	C	[A]	{A, C}	0.0175439	1	TRUE	FALSE	FALSE	0.0347772	57	0	1	56	A	missense_variant&splice_region_variant	MODERATE	F09C6.3	WBGene00008617	transcript	F09C6.3	protein_coding
V	16880038	A	[C]	{A, C}	0.0175439	1	TRUE	FALSE	FALSE	0.0347772	57	0	1	56	C	missense_variant	MODERATE	F09C6.3	WBGene00008617	transcript	F09C6.3	protein_coding
V	16880045	C	[T]	{C, T}	0.45614	1	TRUE	FALSE	TRUE	0.500543	57	0	26	31	T	missense_variant	MODERATE	F09C6.3	WBGene00008617	transcript	F09C6.3	protein_coding
V	16880108	G	[T]	{G, T}	0.45614	1	TRUE	FALSE	FALSE	0.500543	57	0	26	31	T	missense_variant	MODERATE	F09C6.3	WBGene00008617	transcript	F09C6.3	protein_coding
V	16880115	G	[A]	{G, A}	0.403509	1	TRUE	FALSE	TRUE	0.485639	57	0	23	34	A	missense_variant	MODERATE	F09C6.3	WBGene00008617	transcript	F09C6.3	protein_coding
V	16880138	A	[G]	{G, A}	0.45614	1	TRUE	FALSE	TRUE	0.500543	57	0	26	31	G	missense_variant	MODERATE	F09C6.3	WBGene00008617	transcript	F09C6.3	protein_coding
V	16880142	G	[A]	{G, A}	0.0526316	1	TRUE	FALSE	TRUE	0.100605	57	0	3	54	A	missense_variant	MODERATE	F09C6.3	WBGene00008617	transcript	F09C6.3	protein_coding
V	16880997	G	[T]	{G, T}	0.0175439	1	TRUE	FALSE	FALSE	0.0347772	57	0	1	56	T	missense_variant	MODERATE	F09C6.14	WBGene00044278	transcript	F09C6.14	protein_coding
V	16881015	C	[G]	{G, C}	0.368421	1	TRUE	FALSE	FALSE	0.469492	57	0	21	36	G	missense_variant	MODERATE	F09C6.14	WBGene00044278	transcript	F09C6.14	protein_coding
V	16881021	A	[G]	{G, A}	0.0701754	1	TRUE	FALSE	TRUE	0.131657	57	0	4	53	G	missense_variant	MODERATE	F09C6.14	WBGene00044278	transcript	F09C6.14	protein_coding
V	16881091	G	[A]	{G, A}	0.0350877	1	TRUE	FALSE	TRUE	0.0683124	57	0	2	55	A	missense_variant&splice_region_variant	MODERATE	F09C6.14	WBGene00044278	transcript	F09C6.14	protein_coding
V	16881122	C	[T]	{C, T}	0.0701754	1	TRUE	FALSE	TRUE	0.131657	57	0	4	53	T	missense_variant	MODERATE	F09C6.14	WBGene00044278	transcript	F09C6.14	protein_coding
V	16881137	A	[G]	{G, A}	0.438596	1	TRUE	FALSE	TRUE	0.496817	57	0	25	32	G	missense_variant	MODERATE	F09C6.14	WBGene00044278	transcript	F09C6.14	protein_coding
V	16881153	C	[G]	{G, C}	0.45614	1	TRUE	FALSE	FALSE	0.500543	57	0	26	31	G	missense_variant	MODERATE	F09C6.14	WBGene00044278	transcript	F09C6.14	protein_coding
V	16881162	T	[G]	{G, T}	0.45614	1	TRUE	FALSE	FALSE	0.500543	57	0	26	31	G	missense_variant	MODERATE	F09C6.14	WBGene00044278	transcript	F09C6.14	protein_coding
V	16881184	G	[A]	{G, A}	0.0350877	1	TRUE	FALSE	TRUE	0.0683124	57	0	2	55	A	missense_variant	MODERATE	F09C6.14	WBGene00044278	transcript	F09C6.14	protein_coding
V	16881280	G	[A]	{G, A}	0.45614	1	TRUE	FALSE	TRUE	0.500543	57	0	26	31	A	missense_variant	MODERATE	F09C6.14	WBGene00044278	transcript	F09C6.14	protein_coding
V	16881287	A	[T]	{A, T}	0.45614	1	TRUE	FALSE	FALSE	0.500543	57	0	26	31	T	missense_variant	MODERATE	F09C6.14	WBGene00044278	transcript	F09C6.14	protein_coding
V	16881292	C	[A]	{A, C}	0.45614	1	TRUE	FALSE	FALSE	0.500543	57	0	26	31	A	missense_variant	MODERATE	F09C6.14	WBGene00044278	transcript	F09C6.14	protein_coding
V	16881912	T	[G]	{G, T}	0.0961538	0.912281	TRUE	FALSE	FALSE	0.175504	52	0	5	47	G	missense_variant	MODERATE	F09C6.11	WBGene00044181	transcript	F09C6.11b	protein_coding
V	16881923	G	[T]	{G, T}	0.0961538	0.912281	TRUE	FALSE	FALSE	0.175504	52	0	5	47	T	missense_variant	MODERATE	F09C6.11	WBGene00044181	transcript	F09C6.11b	protein_coding
V	16881924	C	[G]	{G, C}	0.0961538	0.912281	TRUE	FALSE	FALSE	0.175504	52	0	5	47	G	missense_variant	MODERATE	F09C6.11	WBGene00044181	transcript	F09C6.11b	protein_coding
V	16881930	A	[G]	{G, A}	0.0961538	0.912281	TRUE	FALSE	TRUE	0.175504	52	0	5	47	G	missense_variant	MODERATE	F09C6.11	WBGene00044181	transcript	F09C6.11b	protein_coding
V	16881938	G	[A]	{G, A}	0.0961538	0.912281	TRUE	FALSE	TRUE	0.175504	52	0	5	47	A	missense_variant	MODERATE	F09C6.11	WBGene00044181	transcript	F09C6.11b	protein_coding
V	16881962	A	[G]	{G, A}	0.0192308	0.912281	TRUE	FALSE	TRUE	0.0380881	52	0	1	51	G	missense_variant	MODERATE	F09C6.11	WBGene00044181	transcript	F09C6.11b	protein_coding
V	16881975	A	[T]	{A, T}	0.0232558	0.754386	TRUE	FALSE	FALSE	0.0459644	43	0	1	42	T	missense_variant	MODERATE	F09C6.11	WBGene00044181	transcript	F09C6.11b	protein_coding
V	16881987	C	[T]	{C, T}	0.45614	1	TRUE	FALSE	TRUE	0.500543	57	0	26	31	T	missense_variant	MODERATE	F09C6.11	WBGene00044181	transcript	F09C6.11b	protein_coding
V	16882003	G	[A, T]	{G, A, T}	0.45614	1	TRUE	FALSE	FALSE	0.500543	57	0	26	31	T	missense_variant	MODERATE	F09C6.11	WBGene00044181	transcript	F09C6.11a	protein_coding
V	16882063	A	[G, C]	{G, A, C}	0.438596	1	TRUE	FALSE	FALSE	0.496817	57	0	25	32	C	missense_variant	MODERATE	F09C6.11	WBGene00044181	transcript	F09C6.11b	protein_coding
V	16882066	A	[G]	{G, A}	0.45614	1	TRUE	FALSE	TRUE	0.500543	57	0	26	31	G	missense_variant	MODERATE	F09C6.11	WBGene00044181	transcript	F09C6.11b	protein_coding
V	16882072	A	[G]	{G, A}	0.368421	1	TRUE	FALSE	TRUE	0.469492	57	0	21	36	G	missense_variant	MODERATE	F09C6.11	WBGene00044181	transcript	F09C6.11b	protein_coding
V	16882081	G	[A]	{G, A}	0.0175439	1	TRUE	FALSE	TRUE	0.0347772	57	0	1	56	A	missense_variant	MODERATE	F09C6.11	WBGene00044181	transcript	F09C6.11b	protein_coding
V	16882106	T	[C]	{C, T}	0.0526316	1	TRUE	FALSE	TRUE	0.100605	57	0	3	54	C	missense_variant	MODERATE	F09C6.11	WBGene00044181	transcript	F09C6.11a	protein_coding
V	16882115	A	[G]	{G, A}	0.45614	1	TRUE	FALSE	TRUE	0.500543	57	0	26	31	G	missense_variant	MODERATE	F09C6.11	WBGene00044181	transcript	F09C6.11a	protein_coding
V	16882128	G	[T]	{G, T}	0.368421	1	TRUE	FALSE	FALSE	0.469492	57	0	21	36	T	missense_variant	MODERATE	F09C6.11	WBGene00044181	transcript	F09C6.11b	protein_coding
V	16882132	C	[T]	{C, T}	0.0175439	1	TRUE	FALSE	TRUE	0.0347772	57	0	1	56	T	missense_variant	MODERATE	F09C6.11	WBGene00044181	transcript	F09C6.11b	protein_coding
V	16882141	T	[C]	{C, T}	0.45614	1	TRUE	FALSE	TRUE	0.500543	57	0	26	31	C	missense_variant	MODERATE	F09C6.11	WBGene00044181	transcript	F09C6.11b	protein_coding
V	16882146	T	[A]	{A, T}	0.45614	1	TRUE	FALSE	FALSE	0.500543	57	0	26	31	A	missense_variant	MODERATE	F09C6.11	WBGene00044181	transcript	F09C6.11a	protein_coding
V	16882212	T	[A]	{A, T}	0.45614	1	TRUE	FALSE	FALSE	0.500543	57	0	26	31	A	missense_variant	MODERATE	F09C6.11	WBGene00044181	transcript	F09C6.11a	protein_coding
V	16882244	C	[T]	{C, T}	0.45614	1	TRUE	FALSE	TRUE	0.500543	57	0	26	31	T	missense_variant	MODERATE	F09C6.11	WBGene00044181	transcript	F09C6.11a	protein_coding
V	16882282	G	[A]	{G, A}	0.0175439	1	TRUE	FALSE	TRUE	0.0347772	57	0	1	56	A	missense_variant	MODERATE	F09C6.11	WBGene00044181	transcript	F09C6.11a	protein_coding
V	16882283	T	[C]	{C, T}	0.0175439	1	TRUE	FALSE	TRUE	0.0347772	57	0	1	56	C	missense_variant	MODERATE	F09C6.11	WBGene00044181	transcript	F09C6.11a	protein_coding
V	16882285	A	[G]	{G, A}	0.0350877	1	TRUE	FALSE	TRUE	0.0683124	57	0	2	55	G	missense_variant	MODERATE	F09C6.11	WBGene00044181	transcript	F09C6.11a	protein_coding
V	16882286	C	[T]	{C, T}	0.0175439	1	TRUE	FALSE	TRUE	0.0347772	57	0	1	56	T	missense_variant	MODERATE	F09C6.11	WBGene00044181	transcript	F09C6.11a	protein_coding
V	16882291	G	[C]	{G, C}	0.0175439	1	TRUE	FALSE	FALSE	0.0347772	57	0	1	56	C	missense_variant	MODERATE	F09C6.11	WBGene00044181	transcript	F09C6.11a	protein_coding
V	16882298	T	[C]	{C, T}	0.0701754	1	TRUE	FALSE	TRUE	0.131657	57	0	4	53	C	missense_variant	MODERATE	F09C6.11	WBGene00044181	transcript	F09C6.11a	protein_coding
V	16882897	C	[G]	{G, C}	0.45614	1	TRUE	FALSE	FALSE	0.500543	57	0	26	31	G	missense_variant	MODERATE	F09C6.12	WBGene00044182	transcript	F09C6.12	protein_coding
V	16882933	A	[C]	{A, C}	0.45614	1	TRUE	FALSE	FALSE	0.500543	57	0	26	31	C	missense_variant	MODERATE	F09C6.12	WBGene00044182	transcript	F09C6.12	protein_coding
V	16882934	T	[G]	{G, T}	0.45614	1	TRUE	FALSE	FALSE	0.500543	57	0	26	31	G	missense_variant	MODERATE	F09C6.12	WBGene00044182	transcript	F09C6.12	protein_coding
V	16882942	A	[G]	{G, A}	0.0175439	1	TRUE	FALSE	TRUE	0.0347772	57	0	1	56	G	missense_variant	MODERATE	F09C6.12	WBGene00044182	transcript	F09C6.12	protein_coding
V	16882959	A	[T]	{A, T}	0.0350877	1	TRUE	FALSE	FALSE	0.0683124	57	0	2	55	T	missense_variant	MODERATE	F09C6.12	WBGene00044182	transcript	F09C6.12	protein_coding
V	16882968	G	[A]	{G, A}	0.45614	1	TRUE	FALSE	TRUE	0.500543	57	0	26	31	A	missense_variant	MODERATE	F09C6.12	WBGene00044182	transcript	F09C6.12	protein_coding
V	16883123	G	[T, C]	{G, C, T}	0.45614	1	TRUE	FALSE	FALSE	0.500543	57	0	26	31	C	missense_variant	MODERATE	F09C6.12	WBGene00044182	transcript	F09C6.12	protein_coding
V	16885130	C	[A]	{A, C}	0.0175439	1	TRUE	FALSE	FALSE	0.0347772	57	0	1	56	A	missense_variant	MODERATE	F09C6.13	WBGene00044183	transcript	F09C6.13	protein_coding
V	16885139	C	[G]	{G, C}	0.0350877	1	TRUE	FALSE	FALSE	0.0683124	57	0	2	55	G	missense_variant	MODERATE	F09C6.13	WBGene00044183	transcript	F09C6.13	protein_coding
V	16885142	C	[A]	{A, C}	0.140351	1	TRUE	FALSE	FALSE	0.24344	57	0	8	49	A	missense_variant	MODERATE	F09C6.13	WBGene00044183	transcript	F09C6.13	protein_coding
V	16885326	A	[T]	{A, T}	0.0350877	1	TRUE	FALSE	FALSE	0.0683124	57	0	2	55	T	missense_variant	MODERATE	F09C6.13	WBGene00044183	transcript	F09C6.13	protein_coding
V	16887479	C	[T]	{C, T}	0.0175439	1	TRUE	FALSE	TRUE	0.0347772	57	0	1	56	T	missense_variant	MODERATE	F09C6.1	WBGene00008615	transcript	F09C6.1	protein_coding
V	16887554	G	[T]	{G, T}	0.0350877	1	TRUE	FALSE	FALSE	0.0683124	57	0	2	55	T	missense_variant	MODERATE	F09C6.1	WBGene00008615	transcript	F09C6.1	protein_coding
V	16887731	C	[A]	{A, C}	0.0175439	1	TRUE	FALSE	FALSE	0.0347772	57	0	1	56	A	missense_variant	MODERATE	F09C6.1	WBGene00008615	transcript	F09C6.1	protein_coding
V	16887797	T	[C]	{C, T}	0.0526316	1	TRUE	FALSE	TRUE	0.100605	57	0	3	54	C	missense_variant	MODERATE	F09C6.1	WBGene00008615	transcript	F09C6.1	protein_coding
V	16887867	T	[A]	{A, T}	0.0350877	1	TRUE	FALSE	FALSE	0.0683124	57	0	2	55	A	missense_variant	MODERATE	F09C6.1	WBGene00008615	transcript	F09C6.1	protein_coding
V	16887940	A	[T]	{A, T}	0.0526316	1	TRUE	FALSE	FALSE	0.100605	57	0	3	54	T	missense_variant	MODERATE	F09C6.1	WBGene00008615	transcript	F09C6.1	protein_coding
V	16887949	C	[T]	{C, T}	0.0350877	1	TRUE	FALSE	TRUE	0.0683124	57	0	2	55	T	missense_variant	MODERATE	F09C6.1	WBGene00008615	transcript	F09C6.1	protein_coding
V	16887957	A	[G]	{G, A}	0.0175439	1	TRUE	FALSE	TRUE	0.0347772	57	0	1	56	G	missense_variant	MODERATE	F09C6.1	WBGene00008615	transcript	F09C6.1	protein_coding
V	16887972	G	[A]	{G, A}	0.0175439	1	TRUE	FALSE	TRUE	0.0347772	57	0	1	56	A	missense_variant	MODERATE	F09C6.1	WBGene00008615	transcript	F09C6.1	protein_coding
V	16887973	C	[T]	{C, T}	0.0350877	1	TRUE	FALSE	TRUE	0.0683124	57	0	2	55	T	missense_variant	MODERATE	F09C6.1	WBGene00008615	transcript	F09C6.1	protein_coding
V	16887979	C	[T]	{C, T}	0.0350877	1	TRUE	FALSE	TRUE	0.0683124	57	0	2	55	T	missense_variant	MODERATE	F09C6.1	WBGene00008615	transcript	F09C6.1	protein_coding
V	16888095	T	[A]	{A, T}	0.0526316	1	TRUE	FALSE	FALSE	0.100605	57	0	3	54	A	missense_variant	MODERATE	F09C6.1	WBGene00008615	transcript	F09C6.1	protein_coding
V	16888382	C	[T]	{C, T}	0.0350877	1	TRUE	FALSE	TRUE	0.0683124	57	0	2	55	T	missense_variant&splice_region_variant	MODERATE	F09C6.1	WBGene00008615	transcript	F09C6.1	protein_coding
V	16888408	T	[A]	{A, T}	0.0526316	1	TRUE	FALSE	FALSE	0.100605	57	0	3	54	A	missense_variant	MODERATE	F09C6.1	WBGene00008615	transcript	F09C6.1	protein_coding
V	16888417	C	[G]	{G, C}	0.473684	1	TRUE	FALSE	FALSE	0.503027	57	0	27	30	G	missense_variant	MODERATE	F09C6.1	WBGene00008615	transcript	F09C6.1	protein_coding
V	16888468	C	[G]	{G, C}	0.45614	1	TRUE	FALSE	FALSE	0.500543	57	0	26	31	G	missense_variant	MODERATE	F09C6.1	WBGene00008615	transcript	F09C6.1	protein_coding
V	16888469	A	[C]	{A, C}	0.45614	1	TRUE	FALSE	FALSE	0.500543	57	0	26	31	C	missense_variant	MODERATE	F09C6.1	WBGene00008615	transcript	F09C6.1	protein_coding
V	16889306	A	[C]	{A, C}	0.0175439	1	TRUE	FALSE	FALSE	0.0347772	57	0	1	56	C	missense_variant	MODERATE	fbxa-44	WBGene00008616	transcript	F09C6.2	protein_coding
V	16889317	A	[G]	{G, A}	0.0701754	1	TRUE	FALSE	TRUE	0.131657	57	2	3	52	G	missense_variant	MODERATE	fbxa-44	WBGene00008616	transcript	F09C6.2	protein_coding
V	16889323	A	[T, G]	{G, A, T}	0.0526316	1	TRUE	FALSE	FALSE	0.100605	57	2	2	53	G	missense_variant	MODERATE	fbxa-44	WBGene00008616	transcript	F09C6.2	protein_coding
V	16889330	C	[T]	{C, T}	0.0175439	1	TRUE	FALSE	TRUE	0.0347772	57	0	1	56	T	missense_variant	MODERATE	fbxa-44	WBGene00008616	transcript	F09C6.2	protein_coding
V	16889347	C	[T, A]	{C, T}	0.0350877	1	TRUE	FALSE	FALSE	0.0683124	57	0	2	55	A	missense_variant	MODERATE	fbxa-44	WBGene00008616	transcript	F09C6.2	protein_coding
V	16889359	A	[G]	{G, A}	0.0350877	1	TRUE	FALSE	TRUE	0.0683124	57	0	2	55	G	missense_variant	MODERATE	fbxa-44	WBGene00008616	transcript	F09C6.2	protein_coding
V	16889378	G	[A]	{G, A}	0.0178571	0.982456	TRUE	FALSE	TRUE	0.0353925	56	0	1	55	A	missense_variant	MODERATE	fbxa-44	WBGene00008616	transcript	F09C6.2	protein_coding
V	16889381	G	[A]	{G, A}	0.0357143	0.982456	TRUE	FALSE	TRUE	0.0694981	56	0	2	54	A	missense_variant	MODERATE	fbxa-44	WBGene00008616	transcript	F09C6.2	protein_coding
V	16889833	A	[C]	{A, C}	0.0526316	1	TRUE	FALSE	FALSE	0.100605	57	0	3	54	C	missense_variant	MODERATE	fbxa-44	WBGene00008616	transcript	F09C6.2	protein_coding
V	16889845	A	[C]	{A, C}	0.0350877	1	TRUE	FALSE	FALSE	0.0683124	57	0	2	55	C	missense_variant	MODERATE	fbxa-44	WBGene00008616	transcript	F09C6.2	protein_coding
V	16889846	G	[T]	{G, T}	0.0350877	1	TRUE	FALSE	FALSE	0.0683124	57	0	2	55	T	missense_variant	MODERATE	fbxa-44	WBGene00008616	transcript	F09C6.2	protein_coding
V	16889859	T	[A]	{A, T}	0.0526316	1	TRUE	FALSE	FALSE	0.100605	57	0	3	54	A	missense_variant	MODERATE	fbxa-44	WBGene00008616	transcript	F09C6.2	protein_coding
V	16889897	A	[G]	{G, A}	0.0350877	1	TRUE	FALSE	TRUE	0.0683124	57	0	2	55	G	missense_variant	MODERATE	fbxa-44	WBGene00008616	transcript	F09C6.2	protein_coding
V	16889905	C	[A]	{A, C}	0.0350877	1	TRUE	FALSE	FALSE	0.0683124	57	0	2	55	A	missense_variant	MODERATE	fbxa-44	WBGene00008616	transcript	F09C6.2	protein_coding
V	16889908	G	[T]	{G, T}	0.0350877	1	TRUE	FALSE	FALSE	0.0683124	57	0	2	55	T	missense_variant	MODERATE	fbxa-44	WBGene00008616	transcript	F09C6.2	protein_coding
V	16889920	C	[A]	{A, C}	0.0350877	1	TRUE	FALSE	FALSE	0.0683124	57	0	2	55	A	missense_variant	MODERATE	fbxa-44	WBGene00008616	transcript	F09C6.2	protein_coding
V	16889921	T	[C]	{C, T}	0.0350877	1	TRUE	FALSE	TRUE	0.0683124	57	0	2	55	C	missense_variant	MODERATE	fbxa-44	WBGene00008616	transcript	F09C6.2	protein_coding
V	16889925	A	[G, C]	{A, C}	0.0350877	1	TRUE	FALSE	FALSE	0.0683124	57	0	2	55	C	missense_variant	MODERATE	fbxa-44	WBGene00008616	transcript	F09C6.2	protein_coding
V	16889931	C	[A]	{A, C}	0.0350877	1	TRUE	FALSE	FALSE	0.0683124	57	0	2	55	A	missense_variant	MODERATE	fbxa-44	WBGene00008616	transcript	F09C6.2	protein_coding
V	16889933	G	[A]	{G, A}	0.0350877	1	TRUE	FALSE	TRUE	0.0683124	57	0	2	55	A	missense_variant	MODERATE	fbxa-44	WBGene00008616	transcript	F09C6.2	protein_coding
V	16889955	C	[A]	{A, C}	0.0350877	1	TRUE	FALSE	FALSE	0.0683124	57	0	2	55	A	missense_variant	MODERATE	fbxa-44	WBGene00008616	transcript	F09C6.2	protein_coding
V	16889957	C	[A]	{A, C}	0.0350877	1	TRUE	FALSE	FALSE	0.0683124	57	0	2	55	A	missense_variant	MODERATE	fbxa-44	WBGene00008616	transcript	F09C6.2	protein_coding
V	16889959	G	[A]	{G, A}	0.0350877	1	TRUE	FALSE	TRUE	0.0683124	57	0	2	55	A	missense_variant	MODERATE	fbxa-44	WBGene00008616	transcript	F09C6.2	protein_coding
V	16889967	C	[T, A]	{C, T}	0.0350877	1	TRUE	FALSE	FALSE	0.0683124	57	0	2	55	A	missense_variant	MODERATE	fbxa-44	WBGene00008616	transcript	F09C6.2	protein_coding
V	16889968	A	[G]	{G, A}	0.140351	1	TRUE	FALSE	TRUE	0.24344	57	0	8	49	G	missense_variant	MODERATE	fbxa-44	WBGene00008616	transcript	F09C6.2	protein_coding
V	16889978	G	[A]	{G, A}	0.140351	1	TRUE	FALSE	TRUE	0.24344	57	0	8	49	A	missense_variant	MODERATE	fbxa-44	WBGene00008616	transcript	F09C6.2	protein_coding
V	16890007	G	[A]	{G, A}	0.0350877	1	TRUE	FALSE	TRUE	0.0683124	57	0	2	55	A	missense_variant	MODERATE	fbxa-44	WBGene00008616	transcript	F09C6.2	protein_coding
V	16890008	C	[G]	{G, C}	0.0350877	1	TRUE	FALSE	FALSE	0.0683124	57	0	2	55	G	missense_variant	MODERATE	fbxa-44	WBGene00008616	transcript	F09C6.2	protein_coding
V	16890015	C	[G]	{G, C}	0.0350877	1	TRUE	FALSE	FALSE	0.0683124	57	0	2	55	G	missense_variant	MODERATE	fbxa-44	WBGene00008616	transcript	F09C6.2	protein_coding
V	16890032	T	[A]	{A, T}	0.0526316	1	TRUE	FALSE	FALSE	0.100605	57	0	3	54	A	missense_variant	MODERATE	fbxa-44	WBGene00008616	transcript	F09C6.2	protein_coding
V	16890033	G	[A]	{G, A}	0.0526316	1	TRUE	FALSE	TRUE	0.100605	57	0	3	54	A	missense_variant	MODERATE	fbxa-44	WBGene00008616	transcript	F09C6.2	protein_coding
V	16890100	G	[A]	{G, A}	0.0175439	1	TRUE	FALSE	TRUE	0.0347772	57	0	1	56	A	missense_variant	MODERATE	fbxa-44	WBGene00008616	transcript	F09C6.2	protein_coding
V	16890107	A	[C]	{A, C}	0.0526316	1	TRUE	FALSE	FALSE	0.100605	57	0	3	54	C	missense_variant	MODERATE	fbxa-44	WBGene00008616	transcript	F09C6.2	protein_coding
V	16890109	C	[A]	{A, C}	0.0175439	1	TRUE	FALSE	FALSE	0.0347772	57	0	1	56	A	missense_variant	MODERATE	fbxa-44	WBGene00008616	transcript	F09C6.2	protein_coding
V	16890143	T	[C]	{C, T}	0.0526316	1	TRUE	FALSE	TRUE	0.100605	57	0	3	54	C	missense_variant	MODERATE	fbxa-44	WBGene00008616	transcript	F09C6.2	protein_coding
V	16890172	C	[G]	{G, C}	0.0526316	1	TRUE	FALSE	FALSE	0.100605	57	0	3	54	G	missense_variant	MODERATE	fbxa-44	WBGene00008616	transcript	F09C6.2	protein_coding
V	16890176	T	[A]	{A, T}	0.0526316	1	TRUE	FALSE	FALSE	0.100605	57	0	3	54	A	missense_variant	MODERATE	fbxa-44	WBGene00008616	transcript	F09C6.2	protein_coding
V	16890282	T	[A]	{A, T}	0.0526316	1	TRUE	FALSE	FALSE	0.100605	57	0	3	54	A	missense_variant	MODERATE	fbxa-44	WBGene00008616	transcript	F09C6.2	protein_coding
V	16890465	T	[G]	{G, T}	0.105263	1	TRUE	FALSE	FALSE	0.190033	57	0	6	51	G	missense_variant	MODERATE	fbxa-44	WBGene00008616	transcript	F09C6.2	protein_coding
V	16890472	G	[A]	{G, A}	0.107143	0.982456	TRUE	FALSE	TRUE	0.19305	56	0	6	50	A	missense_variant	MODERATE	fbxa-44	WBGene00008616	transcript	F09C6.2	protein_coding
V	16890473	A	[G, T]	{G, A}	0.0178571	0.982456	TRUE	FALSE	FALSE	0.0353925	56	0	1	55	G	missense_variant	MODERATE	fbxa-44	WBGene00008616	transcript	F09C6.2	protein_coding
V	16890474	G	[C]	{G, C}	0.0178571	0.982456	TRUE	FALSE	FALSE	0.0353925	56	0	1	55	C	missense_variant	MODERATE	fbxa-44	WBGene00008616	transcript	F09C6.2	protein_coding
V	16890475	T	[G]	{G, T}	0.0175439	1	TRUE	FALSE	FALSE	0.0347772	57	0	1	56	G	missense_variant	MODERATE	fbxa-44	WBGene00008616	transcript	F09C6.2	protein_coding
V	16890476	C	[T]	{C, T}	0.0175439	1	TRUE	FALSE	TRUE	0.0347772	57	0	1	56	T	missense_variant	MODERATE	fbxa-44	WBGene00008616	transcript	F09C6.2	protein_coding
V	16890478	C	[A]	{A, C}	0.0526316	1	TRUE	FALSE	FALSE	0.100605	57	0	3	54	A	missense_variant	MODERATE	fbxa-44	WBGene00008616	transcript	F09C6.2	protein_coding
V	16890479	C	[T]	{C, T}	0.0175439	1	TRUE	FALSE	TRUE	0.0347772	57	0	1	56	T	missense_variant	MODERATE	fbxa-44	WBGene00008616	transcript	F09C6.2	protein_coding
V	16890502	G	[A]	{G, A}	0.0175439	1	TRUE	FALSE	TRUE	0.0347772	57	0	1	56	A	missense_variant	MODERATE	fbxa-44	WBGene00008616	transcript	F09C6.2	protein_coding
V	16890518	G	[A]	{G, A}	0.0614035	1	TRUE	FALSE	TRUE	0.116286	57	1	3	53	A	missense_variant	MODERATE	fbxa-44	WBGene00008616	transcript	F09C6.2	protein_coding
V	16890529	T	[A]	{A, T}	0.263158	1	TRUE	FALSE	FALSE	0.391244	57	2	14	41	A	missense_variant	MODERATE	fbxa-44	WBGene00008616	transcript	F09C6.2	protein_coding
V	16890530	A	[G]	{G, A}	0.122807	1	TRUE	FALSE	TRUE	0.217358	57	0	7	50	G	missense_variant	MODERATE	fbxa-44	WBGene00008616	transcript	F09C6.2	protein_coding
V	16890543	G	[T, A]	{G, A, T}	0.192982	1	TRUE	FALSE	FALSE	0.314237	57	2	10	45	T	missense_variant	MODERATE	fbxa-44	WBGene00008616	transcript	F09C6.2	protein_coding
V	16890546	CGATACTGGCGACGAT	[C]	{CGATACTGGCGACGAT, C}	0.0526316	1	FALSE	TRUE	FALSE	0.100605	57	0	3	54	C	disruptive_inframe_deletion	MODERATE	fbxa-44	WBGene00008616	transcript	F09C6.2	protein_coding
V	16890554	G	[A]	{G, A}	0.0909091	0.964912	TRUE	FALSE	TRUE	0.166806	55	0	5	50	A	missense_variant	MODERATE	fbxa-44	WBGene00008616	transcript	F09C6.2	protein_coding
V	16890610	A	[G]	{G, A}	0.0357143	0.982456	TRUE	FALSE	TRUE	0.0694981	56	0	2	54	G	missense_variant	MODERATE	fbxa-44	WBGene00008616	transcript	F09C6.2	protein_coding
V	16890628	C	[G]	{G, C}	0.0357143	0.982456	TRUE	FALSE	FALSE	0.0694981	56	0	2	54	G	missense_variant	MODERATE	fbxa-44	WBGene00008616	transcript	F09C6.2	protein_coding
V	16890629	A	[C]	{A, C}	0.125	0.982456	TRUE	FALSE	FALSE	0.220721	56	0	7	49	C	missense_variant	MODERATE	fbxa-44	WBGene00008616	transcript	F09C6.2	protein_coding
V	16890631	T	[A]	{A, T}	0.214286	0.982456	TRUE	FALSE	FALSE	0.339768	56	0	12	44	A	missense_variant	MODERATE	fbxa-44	WBGene00008616	transcript	F09C6.2	protein_coding
V	16890634	G	[C]	{G, C}	0.125	0.982456	TRUE	FALSE	FALSE	0.220721	56	0	7	49	C	missense_variant	MODERATE	fbxa-44	WBGene00008616	transcript	F09C6.2	protein_coding
V	16890639	T	[C, A]	{C, T}	0.0357143	0.982456	TRUE	FALSE	FALSE	0.0694981	56	0	2	54	A	missense_variant	MODERATE	fbxa-44	WBGene00008616	transcript	F09C6.2	protein_coding
V	16890641	C	[T]	{C, T}	0.0350877	1	TRUE	FALSE	TRUE	0.0683124	57	0	2	55	T	missense_variant	MODERATE	fbxa-44	WBGene00008616	transcript	F09C6.2	protein_coding
V	16890652	A	[G]	{G, A}	0.0438596	1	TRUE	FALSE	TRUE	0.0846142	57	1	2	54	G	missense_variant	MODERATE	fbxa-44	WBGene00008616	transcript	F09C6.2	protein_coding
V	16890672	A	[T]	{A, T}	0.0438596	1	TRUE	FALSE	FALSE	0.0846142	57	1	2	54	T	missense_variant	MODERATE	fbxa-44	WBGene00008616	transcript	F09C6.2	protein_coding
V	16893762	C	[A]	{A, C}	0.0350877	1	TRUE	FALSE	FALSE	0.0683124	57	0	2	55	A	missense_variant	MODERATE	F09C6.15	WBGene00077492	transcript	F09C6.15	protein_coding
V	16893781	G	[T]	{G, T}	0.0175439	1	TRUE	FALSE	FALSE	0.0347772	57	0	1	56	T	missense_variant&splice_region_variant	MODERATE	F09C6.15	WBGene00077492	transcript	F09C6.15	protein_coding
V	16893845	A	[G]	{G, A}	0.0175439	1	TRUE	FALSE	TRUE	0.0347772	57	0	1	56	G	missense_variant	MODERATE	F09C6.15	WBGene00077492	transcript	F09C6.15	protein_coding
V	16893888	G	[C]	{G, C}	0.0175439	1	TRUE	FALSE	FALSE	0.0347772	57	0	1	56	C	missense_variant	MODERATE	F09C6.15	WBGene00077492	transcript	F09C6.15	protein_coding
V	16893889	T	[G]	{G, T}	0.0175439	1	TRUE	FALSE	FALSE	0.0347772	57	0	1	56	G	missense_variant	MODERATE	F09C6.15	WBGene00077492	transcript	F09C6.15	protein_coding
V	16893892	C	[A]	{A, C}	0.0175439	1	TRUE	FALSE	FALSE	0.0347772	57	0	1	56	A	missense_variant	MODERATE	F09C6.15	WBGene00077492	transcript	F09C6.15	protein_coding
V	16893893	C	[T]	{C, T}	0.0175439	1	TRUE	FALSE	TRUE	0.0347772	57	0	1	56	T	missense_variant	MODERATE	F09C6.15	WBGene00077492	transcript	F09C6.15	protein_coding
V	16893916	G	[A]	{G, A}	0.0175439	1	TRUE	FALSE	TRUE	0.0347772	57	0	1	56	A	missense_variant	MODERATE	F09C6.15	WBGene00077492	transcript	F09C6.15	protein_coding
V	16893932	A	[G]	{G, A}	0.0263158	1	TRUE	FALSE	TRUE	0.0517	57	1	1	55	G	missense_variant	MODERATE	F09C6.15	WBGene00077492	transcript	F09C6.15	protein_coding
V	16893946	G	[A]	{G, A}	0.0526316	1	TRUE	FALSE	TRUE	0.100605	57	0	3	54	A	missense_variant	MODERATE	F09C6.15	WBGene00077492	transcript	F09C6.15	protein_coding
V	16893985	C	[A]	{A, C}	0.0526316	1	TRUE	FALSE	FALSE	0.100605	57	0	3	54	A	missense_variant	MODERATE	F09C6.15	WBGene00077492	transcript	F09C6.15	protein_coding
V	16894030	A	[G]	{G, A}	0.0350877	1	TRUE	FALSE	TRUE	0.0683124	57	2	1	54	G	missense_variant	MODERATE	F09C6.15	WBGene00077492	transcript	F09C6.15	protein_coding
V	16894041	A	[T]	{A, T}	0.0526316	1	TRUE	FALSE	FALSE	0.100605	57	0	3	54	T	missense_variant	MODERATE	F09C6.15	WBGene00077492	transcript	F09C6.15	protein_coding
V	16894043	A	[G]	{G, A}	0.0526316	1	TRUE	FALSE	TRUE	0.100605	57	0	3	54	G	missense_variant	MODERATE	F09C6.15	WBGene00077492	transcript	F09C6.15	protein_coding
V	16894059	T	[C, A]	{C, T}	0.0526316	1	TRUE	FALSE	FALSE	0.100605	57	0	3	54	A	missense_variant	MODERATE	F09C6.15	WBGene00077492	transcript	F09C6.15	protein_coding
V	16894073	G	[C]	{G, C}	0.0526316	1	TRUE	FALSE	FALSE	0.100605	57	0	3	54	C	missense_variant	MODERATE	F09C6.15	WBGene00077492	transcript	F09C6.15	protein_coding
V	16894074	A	[T]	{A, T}	0.0175439	1	TRUE	FALSE	FALSE	0.0347772	57	0	1	56	T	missense_variant	MODERATE	F09C6.15	WBGene00077492	transcript	F09C6.15	protein_coding
V	16894090	C	[A]	{A, C}	0.0350877	1	TRUE	FALSE	FALSE	0.0683124	57	0	2	55	A	missense_variant	MODERATE	F09C6.15	WBGene00077492	transcript	F09C6.15	protein_coding
V	16894096	A	[C]	{A, C}	0.0175439	1	TRUE	FALSE	FALSE	0.0347772	57	0	1	56	C	missense_variant	MODERATE	F09C6.15	WBGene00077492	transcript	F09C6.15	protein_coding
V	16898467	C	[T]	{C, T}	0.0175439	1	TRUE	FALSE	TRUE	0.0347772	57	0	1	56	T	missense_variant	MODERATE	fbxa-45	WBGene00008618	transcript	F09C6.6	protein_coding
V	16898477	C	[A]	{A, C}	0.0175439	1	TRUE	FALSE	FALSE	0.0347772	57	0	1	56	A	missense_variant	MODERATE	fbxa-45	WBGene00008618	transcript	F09C6.6	protein_coding
V	16898489	T	[C]	{C, T}	0.0178571	0.982456	TRUE	FALSE	TRUE	0.0353925	56	0	1	55	C	missense_variant	MODERATE	fbxa-45	WBGene00008618	transcript	F09C6.6	protein_coding
V	16898491	G	[A]	{G, A}	0.0175439	1	TRUE	FALSE	TRUE	0.0347772	57	0	1	56	A	missense_variant	MODERATE	fbxa-45	WBGene00008618	transcript	F09C6.6	protein_coding
V	16898492	A	[G]	{G, A}	0.0175439	1	TRUE	FALSE	TRUE	0.0347772	57	0	1	56	G	missense_variant	MODERATE	fbxa-45	WBGene00008618	transcript	F09C6.6	protein_coding
V	16898522	T	[C]	{C, T}	0.0175439	1	TRUE	FALSE	TRUE	0.0347772	57	0	1	56	C	missense_variant	MODERATE	fbxa-45	WBGene00008618	transcript	F09C6.6	protein_coding
V	16898542	T	[C]	{C, T}	0.0350877	1	TRUE	FALSE	TRUE	0.0683124	57	0	2	55	C	missense_variant	MODERATE	fbxa-45	WBGene00008618	transcript	F09C6.6	protein_coding
V	16898579	C	[A]	{A, C}	0.0526316	1	TRUE	FALSE	FALSE	0.100605	57	0	3	54	A	missense_variant	MODERATE	fbxa-45	WBGene00008618	transcript	F09C6.6	protein_coding
V	16898606	T	[G, C]	{G, T}	0.0526316	1	TRUE	FALSE	FALSE	0.100605	57	0	3	54	C	missense_variant	MODERATE	fbxa-45	WBGene00008618	transcript	F09C6.6	protein_coding
V	16898614	A	[G]	{G, A}	0.0526316	1	TRUE	FALSE	TRUE	0.100605	57	0	3	54	G	missense_variant	MODERATE	fbxa-45	WBGene00008618	transcript	F09C6.6	protein_coding
V	16898627	C	[T]	{C, T}	0.0526316	1	TRUE	FALSE	TRUE	0.100605	57	0	3	54	T	missense_variant	MODERATE	fbxa-45	WBGene00008618	transcript	F09C6.6	protein_coding
V	16898630	A	[C]	{A, C}	0.0175439	1	TRUE	FALSE	FALSE	0.0347772	57	0	1	56	C	missense_variant	MODERATE	fbxa-45	WBGene00008618	transcript	F09C6.6	protein_coding
V	16898631	T	[A]	{A, T}	0.0526316	1	TRUE	FALSE	FALSE	0.100605	57	0	3	54	A	missense_variant	MODERATE	fbxa-45	WBGene00008618	transcript	F09C6.6	protein_coding
V	16898648	T	[G]	{G, T}	0.0350877	1	TRUE	FALSE	FALSE	0.0683124	57	0	2	55	G	missense_variant	MODERATE	fbxa-45	WBGene00008618	transcript	F09C6.6	protein_coding
V	16898727	C	[T]	{C, T}	0.0175439	1	TRUE	FALSE	TRUE	0.0347772	57	0	1	56	T	missense_variant	MODERATE	fbxa-45	WBGene00008618	transcript	F09C6.6	protein_coding
V	16898729	C	[T]	{C, T}	0.0175439	1	TRUE	FALSE	TRUE	0.0347772	57	0	1	56	T	missense_variant	MODERATE	fbxa-45	WBGene00008618	transcript	F09C6.6	protein_coding
V	16898737	T	[A]	{A, T}	0.0175439	1	TRUE	FALSE	FALSE	0.0347772	57	0	1	56	A	missense_variant	MODERATE	fbxa-45	WBGene00008618	transcript	F09C6.6	protein_coding
V	16898743	T	[G]	{G, T}	0.0175439	1	TRUE	FALSE	FALSE	0.0347772	57	0	1	56	G	missense_variant	MODERATE	fbxa-45	WBGene00008618	transcript	F09C6.6	protein_coding
V	16898791	A	[G]	{G, A}	0.0175439	1	TRUE	FALSE	TRUE	0.0347772	57	0	1	56	G	missense_variant	MODERATE	fbxa-45	WBGene00008618	transcript	F09C6.6	protein_coding
V	16898794	A	[T]	{A, T}	0.0526316	1	TRUE	FALSE	FALSE	0.100605	57	0	3	54	T	missense_variant	MODERATE	fbxa-45	WBGene00008618	transcript	F09C6.6	protein_coding
V	16898856	A	[T]	{A, T}	0.0526316	1	TRUE	FALSE	FALSE	0.100605	57	0	3	54	T	missense_variant	MODERATE	fbxa-45	WBGene00008618	transcript	F09C6.6	protein_coding
V	16898858	A	[T]	{A, T}	0.0175439	1	TRUE	FALSE	FALSE	0.0347772	57	0	1	56	T	missense_variant	MODERATE	fbxa-45	WBGene00008618	transcript	F09C6.6	protein_coding
V	16898859	C	[T]	{C, T}	0.0175439	1	TRUE	FALSE	TRUE	0.0347772	57	0	1	56	T	missense_variant	MODERATE	fbxa-45	WBGene00008618	transcript	F09C6.6	protein_coding
V	16898863	G	[A, T]	{G, A}	0.0175439	1	TRUE	FALSE	FALSE	0.0347772	57	0	1	56	A	missense_variant	MODERATE	fbxa-45	WBGene00008618	transcript	F09C6.6	protein_coding
V	16898870	C	[T]	{C, T}	0.0175439	1	TRUE	FALSE	TRUE	0.0347772	57	0	1	56	T	missense_variant	MODERATE	fbxa-45	WBGene00008618	transcript	F09C6.6	protein_coding
V	16898878	C	[T]	{C, T}	0.0175439	1	TRUE	FALSE	TRUE	0.0347772	57	0	1	56	T	missense_variant	MODERATE	fbxa-45	WBGene00008618	transcript	F09C6.6	protein_coding
V	16898916	A	[G]	{G, A}	0.0175439	1	TRUE	FALSE	TRUE	0.0347772	57	0	1	56	G	missense_variant	MODERATE	fbxa-45	WBGene00008618	transcript	F09C6.6	protein_coding
V	16898947	T	[G]	{G, T}	0.0175439	1	TRUE	FALSE	FALSE	0.0347772	57	0	1	56	G	missense_variant	MODERATE	fbxa-45	WBGene00008618	transcript	F09C6.6	protein_coding
V	16899001	C	[T]	{C, T}	0.0175439	1	TRUE	FALSE	TRUE	0.0347772	57	0	1	56	T	missense_variant	MODERATE	fbxa-45	WBGene00008618	transcript	F09C6.6	protein_coding
V	16899002	G	[T, A]	{G, T}	0.0175439	1	TRUE	FALSE	FALSE	0.0347772	57	0	1	56	T	missense_variant	MODERATE	fbxa-45	WBGene00008618	transcript	F09C6.6	protein_coding
V	16899011	C	[A, T]	{A, C}	0.0175439	1	TRUE	FALSE	FALSE	0.0347772	57	0	1	56	A	missense_variant	MODERATE	fbxa-45	WBGene00008618	transcript	F09C6.6	protein_coding
V	16899031	C	[T]	{C, T}	0.0701754	1	TRUE	FALSE	TRUE	0.131657	57	0	4	53	T	missense_variant	MODERATE	fbxa-45	WBGene00008618	transcript	F09C6.6	protein_coding
V	16899042	T	[G]	{G, T}	0.0175439	1	TRUE	FALSE	FALSE	0.0347772	57	0	1	56	G	missense_variant	MODERATE	fbxa-45	WBGene00008618	transcript	F09C6.6	protein_coding
V	16899049	C	[T]	{C, T}	0.0175439	1	TRUE	FALSE	TRUE	0.0347772	57	0	1	56	T	missense_variant	MODERATE	fbxa-45	WBGene00008618	transcript	F09C6.6	protein_coding
V	16899079	A	[G]	{G, A}	0.0175439	1	TRUE	FALSE	TRUE	0.0347772	57	0	1	56	G	missense_variant	MODERATE	fbxa-45	WBGene00008618	transcript	F09C6.6	protein_coding
V	16899094	A	[G]	{G, A}	0.0175439	1	TRUE	FALSE	TRUE	0.0347772	57	0	1	56	G	missense_variant	MODERATE	fbxa-45	WBGene00008618	transcript	F09C6.6	protein_coding
V	16899099	C	[T]	{C, T}	0.0175439	1	TRUE	FALSE	TRUE	0.0347772	57	0	1	56	T	missense_variant	MODERATE	fbxa-45	WBGene00008618	transcript	F09C6.6	protein_coding
V	16899109	A	[T]	{A, T}	0.0175439	1	TRUE	FALSE	FALSE	0.0347772	57	0	1	56	T	missense_variant	MODERATE	fbxa-45	WBGene00008618	transcript	F09C6.6	protein_coding
V	16899115	C	[T]	{C, T}	0.0175439	1	TRUE	FALSE	TRUE	0.0347772	57	0	1	56	T	missense_variant	MODERATE	fbxa-45	WBGene00008618	transcript	F09C6.6	protein_coding
V	16899133	T	[C]	{C, T}	0.0175439	1	TRUE	FALSE	TRUE	0.0347772	57	0	1	56	C	missense_variant	MODERATE	fbxa-45	WBGene00008618	transcript	F09C6.6	protein_coding
V	16899135	T	[C]	{C, T}	0.0350877	1	TRUE	FALSE	TRUE	0.0683124	57	0	2	55	C	missense_variant	MODERATE	fbxa-45	WBGene00008618	transcript	F09C6.6	protein_coding
V	16899136	T	[C]	{C, T}	0.0175439	1	TRUE	FALSE	TRUE	0.0347772	57	0	1	56	C	missense_variant	MODERATE	fbxa-45	WBGene00008618	transcript	F09C6.6	protein_coding
V	16899139	C	[T]	{C, T}	0.0175439	1	TRUE	FALSE	TRUE	0.0347772	57	0	1	56	T	missense_variant	MODERATE	fbxa-45	WBGene00008618	transcript	F09C6.6	protein_coding
V	16899148	G	[T]	{G, T}	0.0175439	1	TRUE	FALSE	FALSE	0.0347772	57	0	1	56	T	missense_variant	MODERATE	fbxa-45	WBGene00008618	transcript	F09C6.6	protein_coding
V	16899186	C	[T]	{C, T}	0.0350877	1	TRUE	FALSE	TRUE	0.0683124	57	0	2	55	T	missense_variant	MODERATE	fbxa-45	WBGene00008618	transcript	F09C6.6	protein_coding
V	16899196	C	[T]	{C, T}	0.0350877	1	TRUE	FALSE	TRUE	0.0683124	57	0	2	55	T	missense_variant	MODERATE	fbxa-45	WBGene00008618	transcript	F09C6.6	protein_coding
V	16899206	C	[A]	{A, C}	0.0701754	1	TRUE	FALSE	FALSE	0.131657	57	0	4	53	A	missense_variant	MODERATE	fbxa-45	WBGene00008618	transcript	F09C6.6	protein_coding
V	16899212	A	[C]	{A, C}	0.0350877	1	TRUE	FALSE	FALSE	0.0683124	57	0	2	55	C	missense_variant	MODERATE	fbxa-45	WBGene00008618	transcript	F09C6.6	protein_coding
V	16899250	G	[C]	{G, C}	0.0175439	1	TRUE	FALSE	FALSE	0.0347772	57	0	1	56	C	missense_variant	MODERATE	fbxa-45	WBGene00008618	transcript	F09C6.6	protein_coding
V	16899274	T	[C, G]	{G, C, T}	0.0526316	1	TRUE	FALSE	FALSE	0.100605	57	0	3	54	C	missense_variant	MODERATE	fbxa-45	WBGene00008618	transcript	F09C6.6	protein_coding
V	16899303	C	[T]	{C, T}	0.0175439	1	TRUE	FALSE	TRUE	0.0347772	57	0	1	56	T	missense_variant	MODERATE	fbxa-45	WBGene00008618	transcript	F09C6.6	protein_coding
V	16901238	G	[C]	{G, C}	0.0175439	1	TRUE	FALSE	FALSE	0.0347772	57	0	1	56	C	missense_variant	MODERATE	srd-68	WBGene00005145	transcript	F09C6.7	protein_coding
V	16901353	C	[T]	{C, T}	0.0350877	1	TRUE	FALSE	TRUE	0.0683124	57	0	2	55	T	missense_variant	MODERATE	srd-68	WBGene00005145	transcript	F09C6.7	protein_coding
V	16901605	G	[A]	{G, A}	0.0350877	1	TRUE	FALSE	TRUE	0.0683124	57	0	2	55	A	missense_variant	MODERATE	srd-68	WBGene00005145	transcript	F09C6.7	protein_coding
V	16901611	G	[T]	{G, T}	0.0350877	1	TRUE	FALSE	FALSE	0.0683124	57	0	2	55	T	missense_variant	MODERATE	srd-68	WBGene00005145	transcript	F09C6.7	protein_coding
V	16901652	A	[C]	{A, C}	0.0526316	1	TRUE	FALSE	FALSE	0.100605	57	0	3	54	C	missense_variant	MODERATE	srd-68	WBGene00005145	transcript	F09C6.7	protein_coding
V	16901690	G	[T, A]	{G, A, T}	0.0701754	1	TRUE	FALSE	FALSE	0.131657	57	0	4	53	T	missense_variant	MODERATE	srd-68	WBGene00005145	transcript	F09C6.7	protein_coding
V	16901765	C	[T, A]	{A, C, T}	0.0526316	1	TRUE	FALSE	FALSE	0.100605	57	0	3	54	A	missense_variant	MODERATE	srd-68	WBGene00005145	transcript	F09C6.7	protein_coding
V	16901771	T	[C]	{C, T}	0.0526316	1	TRUE	FALSE	TRUE	0.100605	57	0	3	54	C	missense_variant	MODERATE	srd-68	WBGene00005145	transcript	F09C6.7	protein_coding
V	16901772	A	[T]	{A, T}	0.0350877	1	TRUE	FALSE	FALSE	0.0683124	57	0	2	55	T	missense_variant	MODERATE	srd-68	WBGene00005145	transcript	F09C6.7	protein_coding
V	16901790	C	[T]	{C, T}	0.0350877	1	TRUE	FALSE	TRUE	0.0683124	57	0	2	55	T	missense_variant	MODERATE	srd-68	WBGene00005145	transcript	F09C6.7	protein_coding
V	16901792	T	[G]	{G, T}	0.0526316	1	TRUE	FALSE	FALSE	0.100605	57	0	3	54	G	missense_variant	MODERATE	srd-68	WBGene00005145	transcript	F09C6.7	protein_coding
V	16901824	C	[G]	{G, C}	0.0526316	1	TRUE	FALSE	FALSE	0.100605	57	0	3	54	G	missense_variant	MODERATE	srd-68	WBGene00005145	transcript	F09C6.7	protein_coding
V	16901842	G	[A]	{G, A}	0.0526316	1	TRUE	FALSE	TRUE	0.100605	57	0	3	54	A	missense_variant&splice_region_variant	MODERATE	srd-68	WBGene00005145	transcript	F09C6.7	protein_coding
V	16902188	C	[A]	{A, C}	0.0350877	1	TRUE	FALSE	FALSE	0.0683124	57	0	2	55	A	missense_variant	MODERATE	srd-68	WBGene00005145	transcript	F09C6.7	protein_coding
V	16902519	A	[C, G]	{A, C}	0.0350877	1	TRUE	FALSE	FALSE	0.0683124	57	0	2	55	C	missense_variant	MODERATE	srd-68	WBGene00005145	transcript	F09C6.7	protein_coding
V	16902820	G	[A]	{G, A}	0.0526316	1	TRUE	FALSE	TRUE	0.100605	57	0	3	54	A	missense_variant	MODERATE	srd-68	WBGene00005145	transcript	F09C6.7	protein_coding
V	16904943	T	[C, A]	{C, T}	0.0178571	0.982456	TRUE	FALSE	FALSE	0.0353925	56	0	1	55	A	missense_variant	MODERATE	nhr-262	WBGene00008619	transcript	F09C6.8	protein_coding
V	16904947	T	[G]	{G, T}	0.0178571	0.982456	TRUE	FALSE	FALSE	0.0353925	56	0	1	55	G	missense_variant	MODERATE	nhr-262	WBGene00008619	transcript	F09C6.8	protein_coding
V	16904957	A	[G]	{G, A}	0.125	0.982456	TRUE	FALSE	TRUE	0.220721	56	0	7	49	G	missense_variant	MODERATE	nhr-262	WBGene00008619	transcript	F09C6.8	protein_coding
V	16904974	T	[A]	{A, T}	0.0178571	0.982456	TRUE	FALSE	FALSE	0.0353925	56	0	1	55	A	missense_variant	MODERATE	nhr-262	WBGene00008619	transcript	F09C6.8	protein_coding
V	16905006	G	[A, T]	{G, A, T}	0.22807	1	TRUE	FALSE	FALSE	0.355224	57	0	13	44	T	missense_variant	MODERATE	nhr-262	WBGene00008619	transcript	F09C6.8	protein_coding
V	16905010	C	[T]	{C, T}	0.0175439	1	TRUE	FALSE	TRUE	0.0347772	57	0	1	56	T	missense_variant	MODERATE	nhr-262	WBGene00008619	transcript	F09C6.8	protein_coding
V	16905052	G	[A]	{G, A}	0.0175439	1	TRUE	FALSE	TRUE	0.0347772	57	0	1	56	A	missense_variant	MODERATE	nhr-262	WBGene00008619	transcript	F09C6.8	protein_coding
V	16905053	A	[G]	{G, A}	0.0175439	1	TRUE	FALSE	TRUE	0.0347772	57	0	1	56	G	missense_variant	MODERATE	nhr-262	WBGene00008619	transcript	F09C6.8	protein_coding
V	16905067	T	[C]	{C, T}	0.0175439	1	TRUE	FALSE	TRUE	0.0347772	57	0	1	56	C	missense_variant	MODERATE	nhr-262	WBGene00008619	transcript	F09C6.8	protein_coding
V	16905104	C	[A]	{A, C}	0.0175439	1	TRUE	FALSE	FALSE	0.0347772	57	0	1	56	A	missense_variant	MODERATE	nhr-262	WBGene00008619	transcript	F09C6.8	protein_coding
V	16905107	T	[C]	{C, T}	0.0175439	1	TRUE	FALSE	TRUE	0.0347772	57	0	1	56	C	missense_variant	MODERATE	nhr-262	WBGene00008619	transcript	F09C6.8	protein_coding
V	16905109	G	[A]	{G, A}	0.0350877	1	TRUE	FALSE	TRUE	0.0683124	57	0	2	55	A	missense_variant	MODERATE	nhr-262	WBGene00008619	transcript	F09C6.8	protein_coding
V	16905114	A	[T]	{A, T}	0.0175439	1	TRUE	FALSE	FALSE	0.0347772	57	0	1	56	T	missense_variant	MODERATE	nhr-262	WBGene00008619	transcript	F09C6.8	protein_coding
V	16905271	A	[G]	{G, A}	0.0350877	1	TRUE	FALSE	TRUE	0.0683124	57	0	2	55	G	missense_variant	MODERATE	nhr-262	WBGene00008619	transcript	F09C6.8	protein_coding
V	16905333	G	[A]	{G, A}	0.0175439	1	TRUE	FALSE	TRUE	0.0347772	57	0	1	56	A	missense_variant	MODERATE	nhr-262	WBGene00008619	transcript	F09C6.8	protein_coding
V	16905339	A	[G]	{G, A}	0.157895	1	TRUE	FALSE	TRUE	0.268281	57	0	9	48	G	missense_variant	MODERATE	nhr-262	WBGene00008619	transcript	F09C6.8	protein_coding
V	16905347	A	[C]	{A, C}	0.0357143	0.982456	TRUE	FALSE	FALSE	0.0694981	56	0	2	54	C	missense_variant&splice_region_variant	MODERATE	nhr-262	WBGene00008619	transcript	F09C6.8	protein_coding
V	16905433	G	[T]	{G, T}	0.0175439	1	TRUE	FALSE	FALSE	0.0347772	57	0	1	56	T	missense_variant	MODERATE	nhr-262	WBGene00008619	transcript	F09C6.8	protein_coding
V	16905435	A	[G]	{G, A}	0.0350877	1	TRUE	FALSE	TRUE	0.0683124	57	0	2	55	G	missense_variant	MODERATE	nhr-262	WBGene00008619	transcript	F09C6.8	protein_coding
V	16905495	G	[A]	{G, A}	0.0175439	1	TRUE	FALSE	TRUE	0.0347772	57	0	1	56	A	missense_variant	MODERATE	nhr-262	WBGene00008619	transcript	F09C6.8	protein_coding
V	16906075	G	[T, C]	{G, C}	0.0175439	1	TRUE	FALSE	FALSE	0.0347772	57	0	1	56	C	missense_variant	MODERATE	nhr-262	WBGene00008619	transcript	F09C6.8	protein_coding
V	16906076	C	[T]	{C, T}	0.0175439	1	TRUE	FALSE	TRUE	0.0347772	57	0	1	56	T	missense_variant	MODERATE	nhr-262	WBGene00008619	transcript	F09C6.8	protein_coding
V	16906191	T	[A]	{A, T}	0.0175439	1	TRUE	FALSE	FALSE	0.0347772	57	0	1	56	A	missense_variant	MODERATE	nhr-262	WBGene00008619	transcript	F09C6.8	protein_coding
V	16906226	T	[A]	{A, T}	0.0175439	1	TRUE	FALSE	FALSE	0.0347772	57	0	1	56	A	missense_variant	MODERATE	nhr-262	WBGene00008619	transcript	F09C6.8	protein_coding
V	16906228	A	[G]	{G, A}	0.0175439	1	TRUE	FALSE	TRUE	0.0347772	57	0	1	56	G	missense_variant	MODERATE	nhr-262	WBGene00008619	transcript	F09C6.8	protein_coding
V	16906231	A	[G]	{G, A}	0.0175439	1	TRUE	FALSE	TRUE	0.0347772	57	0	1	56	G	missense_variant	MODERATE	nhr-262	WBGene00008619	transcript	F09C6.8	protein_coding
V	16906235	T	[C]	{C, T}	0.0175439	1	TRUE	FALSE	TRUE	0.0347772	57	0	1	56	C	missense_variant	MODERATE	nhr-262	WBGene00008619	transcript	F09C6.8	protein_coding
V	16906247	G	[A]	{G, A}	0.0175439	1	TRUE	FALSE	TRUE	0.0347772	57	0	1	56	A	missense_variant	MODERATE	nhr-262	WBGene00008619	transcript	F09C6.8	protein_coding
V	16906390	G	[A]	{G, A}	0.245614	1	TRUE	FALSE	TRUE	0.373855	57	0	14	43	A	missense_variant	MODERATE	nhr-262	WBGene00008619	transcript	F09C6.8	protein_coding
V	16906403	A	[G]	{G, A}	0.0175439	1	TRUE	FALSE	TRUE	0.0347772	57	0	1	56	G	missense_variant	MODERATE	nhr-262	WBGene00008619	transcript	F09C6.8	protein_coding
[truncated: 422 more rows]

## Sheet: Low
CHROM	POS	REF	ALT	allele_set	aaf	call_rate	is_snp	is_indel	is_transition	nucl_diversity	num_called	num_het	num_hom_alt	num_hom_ref	ANN	Mutation type	Impact	Gene name	WBGene ID	Transcript?	Gene ID	Gene Type
V	16601867	C	[T]	{C, T}	0.0740741	0.947368	TRUE	FALSE	TRUE	0.138456	54	0	4	50	T	splice_region_variant&intron_variant	LOW	T03E6.8	WBGene00011397	transcript	T03E6.8.1	protein_coding
V	16601868	A	[C, T]	{A, C}	0.0740741	0.947368	TRUE	FALSE	FALSE	0.138456	54	0	4	50	C	splice_region_variant&intron_variant	LOW	T03E6.8	WBGene00011397	transcript	T03E6.8.1	protein_coding
V	16601877	G	[C]	{G, C}	0.0526316	1	TRUE	FALSE	FALSE	0.100605	57	0	3	54	C	synonymous_variant	LOW	T03E6.8	WBGene00011397	transcript	T03E6.8.1	protein_coding
V	16601889	G	[A]	{G, A}	0.122807	1	TRUE	FALSE	TRUE	0.217358	57	0	7	50	A	synonymous_variant	LOW	T03E6.8	WBGene00011397	transcript	T03E6.8.1	protein_coding
V	16601898	C	[A]	{A, C}	0.0701754	1	TRUE	FALSE	FALSE	0.131657	57	0	4	53	A	synonymous_variant	LOW	T03E6.8	WBGene00011397	transcript	T03E6.8.1	protein_coding
V	16601904	G	[A]	{G, A}	0.0526316	1	TRUE	FALSE	TRUE	0.100605	57	0	3	54	A	synonymous_variant	LOW	T03E6.8	WBGene00011397	transcript	T03E6.8.1	protein_coding
V	16601913	G	[A, T]	{G, A, T}	0.122807	1	TRUE	FALSE	FALSE	0.217358	57	0	7	50	A	synonymous_variant	LOW	T03E6.8	WBGene00011397	transcript	T03E6.8.1	protein_coding
V	16601922	T	[G]	{G, T}	0.122807	1	TRUE	FALSE	FALSE	0.217358	57	0	7	50	G	synonymous_variant	LOW	T03E6.8	WBGene00011397	transcript	T03E6.8.1	protein_coding
V	16601927	A	[G]	{G, A}	0.122807	1	TRUE	FALSE	TRUE	0.217358	57	0	7	50	G	synonymous_variant	LOW	T03E6.8	WBGene00011397	transcript	T03E6.8.1	protein_coding
V	16601931	T	[A, G]	{G, A, T}	0.122807	1	TRUE	FALSE	FALSE	0.217358	57	0	7	50	A	synonymous_variant	LOW	T03E6.8	WBGene00011397	transcript	T03E6.8.1	protein_coding
V	16601940	G	[C, A]	{G, C}	0.122807	1	TRUE	FALSE	FALSE	0.217358	57	0	7	50	A	synonymous_variant	LOW	T03E6.8	WBGene00011397	transcript	T03E6.8.1	protein_coding
V	16601982	A	[G]	{G, A}	0.0526316	1	TRUE	FALSE	TRUE	0.100605	57	0	3	54	G	synonymous_variant	LOW	T03E6.8	WBGene00011397	transcript	T03E6.8.1	protein_coding
V	16601991	C	[T]	{C, T}	0.0526316	1	TRUE	FALSE	TRUE	0.100605	57	0	3	54	T	synonymous_variant	LOW	T03E6.8	WBGene00011397	transcript	T03E6.8.1	protein_coding
V	16601999	A	[G]	{G, A}	0.122807	1	TRUE	FALSE	TRUE	0.217358	57	0	7	50	G	synonymous_variant	LOW	T03E6.8	WBGene00011397	transcript	T03E6.8.1	protein_coding
V	16602003	G	[A]	{G, A}	0.122807	1	TRUE	FALSE	TRUE	0.217358	57	0	7	50	A	synonymous_variant	LOW	T03E6.8	WBGene00011397	transcript	T03E6.8.1	protein_coding
V	16602006	T	[C]	{C, T}	0.0175439	1	TRUE	FALSE	TRUE	0.0347772	57	0	1	56	C	synonymous_variant	LOW	T03E6.8	WBGene00011397	transcript	T03E6.8.1	protein_coding
V	16602012	G	[A]	{G, A}	0.0526316	1	TRUE	FALSE	TRUE	0.100605	57	0	3	54	A	synonymous_variant	LOW	T03E6.8	WBGene00011397	transcript	T03E6.8.1	protein_coding
V	16602045	A	[G]	{G, A}	0.192982	1	TRUE	FALSE	TRUE	0.314237	57	0	11	46	G	synonymous_variant	LOW	T03E6.8	WBGene00011397	transcript	T03E6.8.1	protein_coding
V	16602054	A	[G, T]	{G, A, T}	0.263158	1	TRUE	FALSE	FALSE	0.391244	57	0	15	42	G	synonymous_variant	LOW	T03E6.8	WBGene00011397	transcript	T03E6.8.1	protein_coding
V	16602072	A	[G]	{G, A}	0.0526316	1	TRUE	FALSE	TRUE	0.100605	57	0	3	54	G	synonymous_variant	LOW	T03E6.8	WBGene00011397	transcript	T03E6.8.1	protein_coding
V	16602075	G	[A]	{G, A}	0.0701754	1	TRUE	FALSE	TRUE	0.131657	57	0	4	53	A	synonymous_variant	LOW	T03E6.8	WBGene00011397	transcript	T03E6.8.1	protein_coding
V	16602498	A	[C]	{A, C}	0.0350877	1	TRUE	FALSE	FALSE	0.0683124	57	0	2	55	C	splice_region_variant&intron_variant	LOW	T03E6.8	WBGene00011397	transcript	T03E6.8.1	protein_coding
V	16602533	A	[G]	{G, A}	0.122807	1	TRUE	FALSE	TRUE	0.217358	57	0	7	50	G	synonymous_variant	LOW	T03E6.8	WBGene00011397	transcript	T03E6.8.1	protein_coding
V	16602567	A	[G]	{G, A}	0.263158	1	TRUE	FALSE	TRUE	0.391244	57	0	15	42	G	synonymous_variant	LOW	T03E6.8	WBGene00011397	transcript	T03E6.8.1	protein_coding
V	16602579	A	[G]	{G, A}	0.140351	1	TRUE	FALSE	TRUE	0.24344	57	0	8	49	G	synonymous_variant	LOW	T03E6.8	WBGene00011397	transcript	T03E6.8.1	protein_coding
V	16602582	G	[A]	{G, A}	0.122807	1	TRUE	FALSE	TRUE	0.217358	57	0	7	50	A	synonymous_variant	LOW	T03E6.8	WBGene00011397	transcript	T03E6.8.1	protein_coding
V	16602585	C	[T, G]	{G, C}	0.192982	1	TRUE	FALSE	FALSE	0.314237	57	0	11	46	G	synonymous_variant	LOW	T03E6.8	WBGene00011397	transcript	T03E6.8.1	protein_coding
V	16602597	T	[A, C]	{A, T}	0.245614	1	TRUE	FALSE	FALSE	0.373855	57	0	14	43	A	synonymous_variant	LOW	T03E6.8	WBGene00011397	transcript	T03E6.8.1	protein_coding
V	16602603	T	[C]	{C, T}	0.245614	1	TRUE	FALSE	TRUE	0.373855	57	0	14	43	C	synonymous_variant	LOW	T03E6.8	WBGene00011397	transcript	T03E6.8.1	protein_coding
V	16602609	A	[G, T]	{G, A}	0.245614	1	TRUE	FALSE	FALSE	0.373855	57	0	14	43	G	synonymous_variant	LOW	T03E6.8	WBGene00011397	transcript	T03E6.8.1	protein_coding
V	16602612	G	[A]	{G, A}	0.245614	1	TRUE	FALSE	TRUE	0.373855	57	0	14	43	A	synonymous_variant	LOW	T03E6.8	WBGene00011397	transcript	T03E6.8.1	protein_coding
V	16602615	A	[G]	{G, A}	0.122807	1	TRUE	FALSE	TRUE	0.217358	57	0	7	50	G	synonymous_variant	LOW	T03E6.8	WBGene00011397	transcript	T03E6.8.1	protein_coding
V	16602618	G	[A]	{G, A}	0.0701754	1	TRUE	FALSE	TRUE	0.131657	57	0	4	53	A	synonymous_variant	LOW	T03E6.8	WBGene00011397	transcript	T03E6.8.1	protein_coding
V	16602633	T	[G]	{G, T}	0.245614	1	TRUE	FALSE	FALSE	0.373855	57	0	14	43	G	synonymous_variant	LOW	T03E6.8	WBGene00011397	transcript	T03E6.8.1	protein_coding
V	16602639	A	[T]	{A, T}	0.0701754	1	TRUE	FALSE	FALSE	0.131657	57	0	4	53	T	synonymous_variant	LOW	T03E6.8	WBGene00011397	transcript	T03E6.8.1	protein_coding
V	16602645	G	[A]	{G, A}	0.122807	1	TRUE	FALSE	TRUE	0.217358	57	0	7	50	A	synonymous_variant	LOW	T03E6.8	WBGene00011397	transcript	T03E6.8.1	protein_coding
V	16602648	A	[G]	{G, A}	0.245614	1	TRUE	FALSE	TRUE	0.373855	57	0	14	43	G	synonymous_variant	LOW	T03E6.8	WBGene00011397	transcript	T03E6.8.1	protein_coding
V	16602786	C	[T]	{C, T}	0.0701754	1	TRUE	FALSE	TRUE	0.131657	57	0	4	53	T	synonymous_variant	LOW	T03E6.8	WBGene00011397	transcript	T03E6.8.1	protein_coding
V	16602789	T	[C]	{C, T}	0.263158	1	TRUE	FALSE	TRUE	0.391244	57	0	15	42	C	synonymous_variant	LOW	T03E6.8	WBGene00011397	transcript	T03E6.8.1	protein_coding
V	16602800	G	[A]	{G, A}	0.245614	1	TRUE	FALSE	TRUE	0.373855	57	0	14	43	A	synonymous_variant	LOW	T03E6.8	WBGene00011397	transcript	T03E6.8.1	protein_coding
V	16602810	G	[A, T]	{G, A, T}	0.245614	1	TRUE	FALSE	FALSE	0.373855	57	0	14	43	A	synonymous_variant	LOW	T03E6.8	WBGene00011397	transcript	T03E6.8.1	protein_coding
V	16602873	G	[A]	{G, A}	0.245614	1	TRUE	FALSE	TRUE	0.373855	57	0	14	43	A	synonymous_variant	LOW	T03E6.8	WBGene00011397	transcript	T03E6.8.1	protein_coding
V	16602879	T	[C]	{C, T}	0.245614	1	TRUE	FALSE	TRUE	0.373855	57	0	14	43	C	synonymous_variant	LOW	T03E6.8	WBGene00011397	transcript	T03E6.8.1	protein_coding
V	16602882	G	[A]	{G, A}	0.192982	1	TRUE	FALSE	TRUE	0.314237	57	0	11	46	A	synonymous_variant	LOW	T03E6.8	WBGene00011397	transcript	T03E6.8.1	protein_coding
V	16602885	A	[T]	{A, T}	0.192982	1	TRUE	FALSE	FALSE	0.314237	57	0	11	46	T	synonymous_variant	LOW	T03E6.8	WBGene00011397	transcript	T03E6.8.1	protein_coding
V	16602894	A	[G]	{G, A}	0.245614	1	TRUE	FALSE	TRUE	0.373855	57	0	14	43	G	synonymous_variant	LOW	T03E6.8	WBGene00011397	transcript	T03E6.8.1	protein_coding
V	16602897	A	[T]	{A, T}	0.245614	1	TRUE	FALSE	FALSE	0.373855	57	0	14	43	T	synonymous_variant	LOW	T03E6.8	WBGene00011397	transcript	T03E6.8.1	protein_coding
V	16602903	G	[A]	{G, A}	0.175439	1	TRUE	FALSE	TRUE	0.29188	57	0	10	47	A	synonymous_variant	LOW	T03E6.8	WBGene00011397	transcript	T03E6.8.1	protein_coding
V	16602921	T	[C]	{C, T}	0.0701754	1	TRUE	FALSE	TRUE	0.131657	57	0	4	53	C	synonymous_variant	LOW	T03E6.8	WBGene00011397	transcript	T03E6.8.1	protein_coding
V	16602933	T	[A]	{A, T}	0.0701754	1	TRUE	FALSE	FALSE	0.131657	57	0	4	53	A	synonymous_variant	LOW	T03E6.8	WBGene00011397	transcript	T03E6.8.1	protein_coding
V	16602936	G	[A]	{G, A}	0.0701754	1	TRUE	FALSE	TRUE	0.131657	57	0	4	53	A	synonymous_variant	LOW	T03E6.8	WBGene00011397	transcript	T03E6.8.1	protein_coding
V	16603123	T	[G, C]	{G, C, T}	0.25	0.982456	TRUE	FALSE	FALSE	0.378378	56	0	14	42	C	5_prime_UTR_premature_start_codon_gain_variant	LOW	T03E6.8	WBGene00011397	transcript	T03E6.8.1	protein_coding
V	16603187	A	[T]	{A, T}	0.127273	0.964912	TRUE	FALSE	FALSE	0.224187	55	0	7	48	T	5_prime_UTR_premature_start_codon_gain_variant	LOW	T03E6.8	WBGene00011397	transcript	T03E6.8.1	protein_coding
V	16603263	T	[A]	{A, T}	0.0701754	1	TRUE	FALSE	FALSE	0.131657	57	0	4	53	A	5_prime_UTR_premature_start_codon_gain_variant	LOW	T03E6.8	WBGene00011397	transcript	T03E6.8.1	protein_coding
V	16604204	C	[T]	{C, T}	0.0526316	1	TRUE	FALSE	TRUE	0.100605	57	0	3	54	T	splice_region_variant&non_coding_transcript_exon_variant	LOW	Y32B12C.5	WBGene00194769	transcript	Y32B12C.5	pseudogene
V	16604210	C	[A, T]	{A, C}	0.0535714	0.982456	TRUE	FALSE	FALSE	0.102317	56	0	3	53	A	splice_region_variant&intron_variant	LOW	Y32B12C.5	WBGene00194769	transcript	Y32B12C.5	pseudogene
V	16606648	C	[T]	{C, T}	0.0178571	0.982456	TRUE	FALSE	TRUE	0.0353925	56	0	1	55	T	synonymous_variant	LOW	Y32B12C.1	WBGene00012525	transcript	Y32B12C.1	protein_coding
V	16606660	G	[T]	{G, T}	0.0178571	0.982456	TRUE	FALSE	FALSE	0.0353925	56	0	1	55	T	synonymous_variant	LOW	Y32B12C.1	WBGene00012525	transcript	Y32B12C.1	protein_coding
V	16606672	G	[A]	{G, A}	0.0178571	0.982456	TRUE	FALSE	TRUE	0.0353925	56	0	1	55	A	synonymous_variant	LOW	Y32B12C.1	WBGene00012525	transcript	Y32B12C.1	protein_coding
V	16606705	A	[G]	{G, A}	0.0178571	0.982456	TRUE	FALSE	TRUE	0.0353925	56	0	1	55	G	synonymous_variant	LOW	Y32B12C.1	WBGene00012525	transcript	Y32B12C.1	protein_coding
V	16606773	A	[G]	{G, A}	0.0357143	0.982456	TRUE	FALSE	TRUE	0.0694981	56	0	2	54	G	splice_region_variant&intron_variant	LOW	Y32B12C.1	WBGene00012525	transcript	Y32B12C.1	protein_coding
V	16606887	A	[C]	{A, C}	0.0178571	0.982456	TRUE	FALSE	FALSE	0.0353925	56	0	1	55	C	synonymous_variant	LOW	Y32B12C.1	WBGene00012525	transcript	Y32B12C.1	protein_coding
V	16606898	T	[C]	{C, T}	0.0357143	0.982456	TRUE	FALSE	TRUE	0.0694981	56	0	2	54	C	synonymous_variant	LOW	Y32B12C.1	WBGene00012525	transcript	Y32B12C.1	protein_coding
V	16606904	G	[A]	{G, A}	0.0357143	0.982456	TRUE	FALSE	TRUE	0.0694981	56	0	2	54	A	synonymous_variant	LOW	Y32B12C.1	WBGene00012525	transcript	Y32B12C.1	protein_coding
V	16606916	C	[T]	{C, T}	0.0357143	0.982456	TRUE	FALSE	TRUE	0.0694981	56	0	2	54	T	synonymous_variant	LOW	Y32B12C.1	WBGene00012525	transcript	Y32B12C.1	protein_coding
V	16606919	C	[T]	{C, T}	0.0357143	0.982456	TRUE	FALSE	TRUE	0.0694981	56	0	2	54	T	synonymous_variant	LOW	Y32B12C.1	WBGene00012525	transcript	Y32B12C.1	protein_coding
V	16606991	A	[G]	{G, A}	0.0357143	0.982456	TRUE	FALSE	TRUE	0.0694981	56	0	2	54	G	synonymous_variant	LOW	Y32B12C.1	WBGene00012525	transcript	Y32B12C.1	protein_coding
V	16607073	C	[T]	{C, T}	0.0178571	0.982456	TRUE	FALSE	TRUE	0.0353925	56	0	1	55	T	synonymous_variant	LOW	Y32B12C.1	WBGene00012525	transcript	Y32B12C.1	protein_coding
V	16607079	A	[G]	{G, A}	0.0178571	0.982456	TRUE	FALSE	TRUE	0.0353925	56	0	1	55	G	synonymous_variant	LOW	Y32B12C.1	WBGene00012525	transcript	Y32B12C.1	protein_coding
V	16607088	A	[G]	{G, A}	0.0178571	0.982456	TRUE	FALSE	TRUE	0.0353925	56	0	1	55	G	synonymous_variant	LOW	Y32B12C.1	WBGene00012525	transcript	Y32B12C.1	protein_coding
V	16607121	A	[G]	{G, A}	0.0178571	0.982456	TRUE	FALSE	TRUE	0.0353925	56	0	1	55	G	synonymous_variant	LOW	Y32B12C.1	WBGene00012525	transcript	Y32B12C.1	protein_coding
V	16607142	T	[A]	{A, T}	0.0178571	0.982456	TRUE	FALSE	FALSE	0.0353925	56	0	1	55	A	synonymous_variant	LOW	Y32B12C.1	WBGene00012525	transcript	Y32B12C.1	protein_coding
V	16607148	A	[G]	{G, A}	0.0178571	0.982456	TRUE	FALSE	TRUE	0.0353925	56	0	1	55	G	synonymous_variant	LOW	Y32B12C.1	WBGene00012525	transcript	Y32B12C.1	protein_coding
V	16607238	G	[A]	{G, A}	0.0178571	0.982456	TRUE	FALSE	TRUE	0.0353925	56	0	1	55	A	synonymous_variant	LOW	Y32B12C.1	WBGene00012525	transcript	Y32B12C.1	protein_coding
V	16607250	C	[T]	{C, T}	0.0178571	0.982456	TRUE	FALSE	TRUE	0.0353925	56	0	1	55	T	synonymous_variant	LOW	Y32B12C.1	WBGene00012525	transcript	Y32B12C.1	protein_coding
V	16607274	C	[T]	{C, T}	0.0178571	0.982456	TRUE	FALSE	TRUE	0.0353925	56	0	1	55	T	synonymous_variant	LOW	Y32B12C.1	WBGene00012525	transcript	Y32B12C.1	protein_coding
V	16607904	C	[T]	{C, T}	0.303571	0.982456	TRUE	FALSE	TRUE	0.426641	56	0	17	39	T	synonymous_variant	LOW	Y32B12C.1	WBGene00012525	transcript	Y32B12C.1	protein_coding
V	16611349	G	[A]	{G, A}	0.105263	1	TRUE	FALSE	TRUE	0.190033	57	0	6	51	A	synonymous_variant	LOW	srw-54	WBGene00005801	transcript	Y32B12C.2a	protein_coding
V	16611376	A	[T]	{A, T}	0.105263	1	TRUE	FALSE	FALSE	0.190033	57	0	6	51	T	synonymous_variant	LOW	srw-54	WBGene00005801	transcript	Y32B12C.2a	protein_coding
V	16611412	G	[C]	{G, C}	0.105263	1	TRUE	FALSE	FALSE	0.190033	57	0	6	51	C	synonymous_variant	LOW	srw-54	WBGene00005801	transcript	Y32B12C.2a	protein_coding
V	16611469	A	[C, G]	{G, A}	0.105263	1	TRUE	FALSE	FALSE	0.190033	57	0	6	51	C	synonymous_variant	LOW	srw-54	WBGene00005801	transcript	Y32B12C.2a	protein_coding
V	16611490	C	[T]	{C, T}	0.105263	1	TRUE	FALSE	TRUE	0.190033	57	0	6	51	T	synonymous_variant	LOW	srw-54	WBGene00005801	transcript	Y32B12C.2a	protein_coding
V	16611511	T	[C, A]	{A, T}	0.105263	1	TRUE	FALSE	FALSE	0.190033	57	0	6	51	A	synonymous_variant	LOW	srw-54	WBGene00005801	transcript	Y32B12C.2a	protein_coding
V	16611631	T	[C]	{C, T}	0.105263	1	TRUE	FALSE	TRUE	0.190033	57	0	6	51	C	synonymous_variant	LOW	srw-54	WBGene00005801	transcript	Y32B12C.2a	protein_coding
V	16611723	C	[A]	{A, C}	0.105263	1	TRUE	FALSE	FALSE	0.190033	57	0	6	51	A	synonymous_variant	LOW	srw-54	WBGene00005801	transcript	Y32B12C.2a	protein_coding
V	16611777	C	[T, G]	{G, C}	0.105263	1	TRUE	FALSE	FALSE	0.190033	57	0	6	51	G	synonymous_variant	LOW	srw-54	WBGene00005801	transcript	Y32B12C.2a	protein_coding
V	16611780	C	[T]	{C, T}	0.105263	1	TRUE	FALSE	TRUE	0.190033	57	0	6	51	T	synonymous_variant	LOW	srw-54	WBGene00005801	transcript	Y32B12C.2a	protein_coding
V	16611849	C	[T]	{C, T}	0.105263	1	TRUE	FALSE	TRUE	0.190033	57	0	6	51	T	splice_region_variant&intron_variant	LOW	srw-54	WBGene00005801	transcript	Y32B12C.2a	protein_coding
V	16612102	A	[G]	{G, A}	0.105263	1	TRUE	FALSE	TRUE	0.190033	57	0	6	51	G	synonymous_variant	LOW	srw-54	WBGene00005801	transcript	Y32B12C.2a	protein_coding
V	16612144	C	[T]	{C, T}	0.105263	1	TRUE	FALSE	TRUE	0.190033	57	0	6	51	T	synonymous_variant	LOW	srw-54	WBGene00005801	transcript	Y32B12C.2a	protein_coding
V	16612177	T	[C]	{C, T}	0.105263	1	TRUE	FALSE	TRUE	0.190033	57	0	6	51	C	synonymous_variant	LOW	srw-54	WBGene00005801	transcript	Y32B12C.2a	protein_coding
V	16612183	T	[C]	{C, T}	0.105263	1	TRUE	FALSE	TRUE	0.190033	57	0	6	51	C	synonymous_variant	LOW	srw-54	WBGene00005801	transcript	Y32B12C.2a	protein_coding
V	16612211	C	[T]	{C, T}	0.105263	1	TRUE	FALSE	TRUE	0.190033	57	0	6	51	T	synonymous_variant	LOW	srw-54	WBGene00005801	transcript	Y32B12C.2a	protein_coding
V	16612234	A	[G]	{G, A}	0.105263	1	TRUE	FALSE	TRUE	0.190033	57	0	6	51	G	splice_region_variant&intron_variant	LOW	srw-54	WBGene00005801	transcript	Y32B12C.2b	lincRNA
V	16612372	T	[C]	{C, T}	0.0789474	1	TRUE	FALSE	TRUE	0.146716	57	3	3	51	C	synonymous_variant	LOW	srw-54	WBGene00005801	transcript	Y32B12C.2a	protein_coding
V	16612825	A	[G]	{G, A}	0.105263	1	TRUE	FALSE	TRUE	0.190033	57	0	6	51	G	synonymous_variant	LOW	Y32B12C.3	WBGene00012526	transcript	Y32B12C.3	protein_coding
V	16612870	T	[C]	{C, T}	0.105263	1	TRUE	FALSE	TRUE	0.190033	57	0	6	51	C	synonymous_variant	LOW	Y32B12C.3	WBGene00012526	transcript	Y32B12C.3	protein_coding
V	16612891	A	[G]	{G, A}	0.105263	1	TRUE	FALSE	TRUE	0.190033	57	0	6	51	G	synonymous_variant	LOW	Y32B12C.3	WBGene00012526	transcript	Y32B12C.3	protein_coding
V	16612900	A	[G]	{G, A}	0.105263	1	TRUE	FALSE	TRUE	0.190033	57	0	6	51	G	synonymous_variant	LOW	Y32B12C.3	WBGene00012526	transcript	Y32B12C.3	protein_coding
V	16612906	A	[G]	{G, A}	0.105263	1	TRUE	FALSE	TRUE	0.190033	57	0	6	51	G	synonymous_variant	LOW	Y32B12C.3	WBGene00012526	transcript	Y32B12C.3	protein_coding
V	16612909	G	[A]	{G, A}	0.105263	1	TRUE	FALSE	TRUE	0.190033	57	0	6	51	A	synonymous_variant	LOW	Y32B12C.3	WBGene00012526	transcript	Y32B12C.3	protein_coding
V	16612924	T	[C]	{C, T}	0.105263	1	TRUE	FALSE	TRUE	0.190033	57	0	6	51	C	synonymous_variant	LOW	Y32B12C.3	WBGene00012526	transcript	Y32B12C.3	protein_coding
V	16612930	A	[T]	{A, T}	0.105263	1	TRUE	FALSE	FALSE	0.190033	57	0	6	51	T	synonymous_variant	LOW	Y32B12C.3	WBGene00012526	transcript	Y32B12C.3	protein_coding
V	16612942	G	[A]	{G, A}	0.105263	1	TRUE	FALSE	TRUE	0.190033	57	0	6	51	A	synonymous_variant	LOW	Y32B12C.3	WBGene00012526	transcript	Y32B12C.3	protein_coding
V	16613005	A	[G]	{G, A}	0.105263	1	TRUE	FALSE	TRUE	0.190033	57	0	6	51	G	synonymous_variant	LOW	Y32B12C.3	WBGene00012526	transcript	Y32B12C.3	protein_coding
V	16613020	C	[T]	{C, T}	0.105263	1	TRUE	FALSE	TRUE	0.190033	57	0	6	51	T	synonymous_variant	LOW	Y32B12C.3	WBGene00012526	transcript	Y32B12C.3	protein_coding
V	16613056	C	[A]	{A, C}	0.105263	1	TRUE	FALSE	FALSE	0.190033	57	0	6	51	A	splice_region_variant&intron_variant	LOW	Y32B12C.3	WBGene00012526	transcript	Y32B12C.3	protein_coding
V	16613099	A	[G]	{G, A}	0.105263	1	TRUE	FALSE	TRUE	0.190033	57	0	6	51	G	splice_region_variant&synonymous_variant	LOW	Y32B12C.3	WBGene00012526	transcript	Y32B12C.3	protein_coding
V	16613144	A	[T]	{A, T}	0.105263	1	TRUE	FALSE	FALSE	0.190033	57	0	6	51	T	synonymous_variant	LOW	Y32B12C.3	WBGene00012526	transcript	Y32B12C.3	protein_coding
V	16613156	G	[A, C]	{G, A}	0.105263	1	TRUE	FALSE	FALSE	0.190033	57	0	6	51	A	synonymous_variant	LOW	Y32B12C.3	WBGene00012526	transcript	Y32B12C.3	protein_coding
V	16613240	C	[A]	{A, C}	0.0877193	1	TRUE	FALSE	FALSE	0.161466	57	4	3	50	A	synonymous_variant	LOW	Y32B12C.3	WBGene00012526	transcript	Y32B12C.3	protein_coding
V	16613300	T	[C]	{C, T}	0.0614035	1	TRUE	FALSE	TRUE	0.116286	57	5	1	51	C	synonymous_variant	LOW	Y32B12C.3	WBGene00012526	transcript	Y32B12C.3	protein_coding
V	16613384	C	[T]	{C, T}	0.105263	1	TRUE	FALSE	TRUE	0.190033	57	0	6	51	T	synonymous_variant	LOW	Y32B12C.3	WBGene00012526	transcript	Y32B12C.3	protein_coding
V	16613390	C	[A, T, G]	{C, T}	0.0789474	1	TRUE	FALSE	FALSE	0.146716	57	3	3	51	A	synonymous_variant	LOW	Y32B12C.3	WBGene00012526	transcript	Y32B12C.3	protein_coding
V	16613435	G	[A]	{G, A}	0.0789474	1	TRUE	FALSE	TRUE	0.146716	57	3	3	51	A	synonymous_variant	LOW	Y32B12C.3	WBGene00012526	transcript	Y32B12C.3	protein_coding
V	16613498	A	[G]	{G, A}	0.0789474	1	TRUE	FALSE	TRUE	0.146716	57	3	3	51	G	synonymous_variant	LOW	Y32B12C.3	WBGene00012526	transcript	Y32B12C.3	protein_coding
V	16613504	A	[G]	{G, A}	0.0803571	0.982456	TRUE	FALSE	TRUE	0.149131	56	3	3	50	G	synonymous_variant	LOW	Y32B12C.3	WBGene00012526	transcript	Y32B12C.3	protein_coding
V	16613545	A	[G]	{G, A}	0.0526316	1	TRUE	FALSE	TRUE	0.100605	57	0	3	54	G	synonymous_variant	LOW	Y32B12C.3	WBGene00012526	transcript	Y32B12C.3	protein_coding
V	16613663	C	[T]	{C, T}	0.107143	0.982456	TRUE	FALSE	TRUE	0.19305	56	0	6	50	T	synonymous_variant	LOW	Y32B12C.3	WBGene00012526	transcript	Y32B12C.3	protein_coding
V	16613684	T	[C]	{C, T}	0.107143	0.982456	TRUE	FALSE	TRUE	0.19305	56	0	6	50	C	synonymous_variant	LOW	Y32B12C.3	WBGene00012526	transcript	Y32B12C.3	protein_coding
V	16613708	C	[T]	{C, T}	0.0392157	0.894737	TRUE	FALSE	TRUE	0.0761017	51	0	2	49	T	synonymous_variant	LOW	Y32B12C.3	WBGene00012526	transcript	Y32B12C.3	protein_coding
V	16613714	A	[G]	{G, A}	0.117647	0.894737	TRUE	FALSE	TRUE	0.209668	51	0	6	45	G	synonymous_variant	LOW	Y32B12C.3	WBGene00012526	transcript	Y32B12C.3	protein_coding
V	16613753	A	[G]	{G, A}	0.117647	0.894737	TRUE	FALSE	TRUE	0.209668	51	0	6	45	G	synonymous_variant	LOW	Y32B12C.3	WBGene00012526	transcript	Y32B12C.3	protein_coding
V	16613789	A	[C]	{A, C}	0.0490196	0.894737	TRUE	FALSE	FALSE	0.0941565	51	3	1	47	C	synonymous_variant	LOW	Y32B12C.3	WBGene00012526	transcript	Y32B12C.3	protein_coding
V	16613798	T	[C]	{C, T}	0.0392157	0.894737	TRUE	FALSE	TRUE	0.0761017	51	2	1	48	C	synonymous_variant	LOW	Y32B12C.3	WBGene00012526	transcript	Y32B12C.3	protein_coding
V	16613819	G	[A, C]	{G, A}	0.0686275	0.894737	TRUE	FALSE	FALSE	0.129101	51	5	1	45	A	synonymous_variant	LOW	Y32B12C.3	WBGene00012526	transcript	Y32B12C.3	protein_coding
V	16613849	C	[T]	{C, T}	0.0784314	0.894737	TRUE	FALSE	TRUE	0.145991	51	4	2	45	T	synonymous_variant	LOW	Y32B12C.3	WBGene00012526	transcript	Y32B12C.3	protein_coding
V	16613889	C	[A, G]	{A, C}	0.117647	0.894737	TRUE	FALSE	FALSE	0.209668	51	0	6	45	A	splice_region_variant&intron_variant	LOW	Y32B12C.3	WBGene00012526	transcript	Y32B12C.3	protein_coding
V	16613943	A	[G]	{G, A}	0.12	0.877193	TRUE	FALSE	TRUE	0.213333	50	0	6	44	G	synonymous_variant	LOW	Y32B12C.3	WBGene00012526	transcript	Y32B12C.3	protein_coding
V	16614007	A	[C]	{A, C}	0.122449	0.859649	TRUE	FALSE	FALSE	0.217126	49	0	6	43	C	splice_region_variant&intron_variant	LOW	Y32B12C.3	WBGene00012526	transcript	Y32B12C.3	protein_coding
V	16614210	G	[T]	{G, T}	0.115385	0.912281	TRUE	FALSE	FALSE	0.206124	52	0	6	46	T	synonymous_variant	LOW	Y32B12C.3	WBGene00012526	transcript	Y32B12C.3	protein_coding
V	16614231	T	[C]	{C, T}	0.115385	0.912281	TRUE	FALSE	TRUE	0.206124	52	0	6	46	C	synonymous_variant	LOW	Y32B12C.3	WBGene00012526	transcript	Y32B12C.3	protein_coding
V	16614240	G	[A]	{G, A}	0.115385	0.912281	TRUE	FALSE	TRUE	0.206124	52	0	6	46	A	synonymous_variant	LOW	Y32B12C.3	WBGene00012526	transcript	Y32B12C.3	protein_coding
V	16614258	G	[A]	{G, A}	0.0769231	0.912281	TRUE	FALSE	TRUE	0.143391	52	2	3	47	A	synonymous_variant	LOW	Y32B12C.3	WBGene00012526	transcript	Y32B12C.3	protein_coding
V	16614279	T	[C]	{C, T}	0.0769231	0.912281	TRUE	FALSE	TRUE	0.143391	52	2	3	47	C	synonymous_variant	LOW	Y32B12C.3	WBGene00012526	transcript	Y32B12C.3	protein_coding
V	16614330	C	[T]	{C, T}	0.115385	0.912281	TRUE	FALSE	TRUE	0.206124	52	0	6	46	T	synonymous_variant	LOW	Y32B12C.3	WBGene00012526	transcript	Y32B12C.3	protein_coding
V	16614336	T	[C]	{C, T}	0.307692	0.912281	TRUE	FALSE	TRUE	0.430172	52	0	16	36	C	synonymous_variant	LOW	Y32B12C.3	WBGene00012526	transcript	Y32B12C.3	protein_coding
V	16614345	A	[G]	{G, A}	0.115385	0.912281	TRUE	FALSE	TRUE	0.206124	52	0	6	46	G	synonymous_variant	LOW	Y32B12C.3	WBGene00012526	transcript	Y32B12C.3	protein_coding
V	16614348	A	[G]	{G, A}	0.115385	0.912281	TRUE	FALSE	TRUE	0.206124	52	0	6	46	G	synonymous_variant	LOW	Y32B12C.3	WBGene00012526	transcript	Y32B12C.3	protein_coding
V	16614399	CA	[C]	{CA, C}	0.153846	0.912281	FALSE	TRUE	FALSE	0.262883	52	0	8	44	C	splice_region_variant&intron_variant	LOW	Y32B12C.3	WBGene00012526	transcript	Y32B12C.3	protein_coding
V	16614452	G	[A]	{G, A}	0.0192308	0.912281	TRUE	FALSE	TRUE	0.0380881	52	0	1	51	A	synonymous_variant	LOW	Y32B12C.3	WBGene00012526	transcript	Y32B12C.3	protein_coding
V	16614528	A	[T]	{A, T}	0.0865385	0.912281	TRUE	FALSE	FALSE	0.159634	52	3	3	46	T	synonymous_variant	LOW	Y32B12C.3	WBGene00012526	transcript	Y32B12C.3	protein_coding
V	16614552	A	[C]	{A, C}	0.163636	0.964912	TRUE	FALSE	FALSE	0.27623	55	2	8	45	C	synonymous_variant	LOW	Y32B12C.3	WBGene00012526	transcript	Y32B12C.3	protein_coding
V	16614615	A	[G]	{G, A}	0.342105	1	TRUE	FALSE	TRUE	0.454122	57	3	18	36	G	synonymous_variant	LOW	Y32B12C.3	WBGene00012526	transcript	Y32B12C.3	protein_coding
V	16614657	C	[A]	{A, C}	0.298246	1	TRUE	FALSE	FALSE	0.422295	57	0	17	40	A	synonymous_variant	LOW	Y32B12C.3	WBGene00012526	transcript	Y32B12C.3	protein_coding
V	16614660	A	[G]	{G, A}	0.0877193	1	TRUE	FALSE	TRUE	0.161466	57	4	3	50	G	synonymous_variant	LOW	Y32B12C.3	WBGene00012526	transcript	Y32B12C.3	protein_coding
V	16614669	T	[C, G]	{C, T}	0.157895	1	TRUE	FALSE	FALSE	0.268281	57	2	8	47	C	synonymous_variant	LOW	Y32B12C.3	WBGene00012526	transcript	Y32B12C.3	protein_coding
V	16614684	G	[A]	{G, A}	0.254386	1	TRUE	FALSE	TRUE	0.382705	57	5	12	40	A	synonymous_variant	LOW	Y32B12C.3	WBGene00012526	transcript	Y32B12C.3	protein_coding
V	16614687	G	[A, C]	{G, A}	0.157895	1	TRUE	FALSE	FALSE	0.268281	57	2	8	47	A	synonymous_variant	LOW	Y32B12C.3	WBGene00012526	transcript	Y32B12C.3	protein_coding
V	16614690	G	[A]	{G, A}	0.157895	1	TRUE	FALSE	TRUE	0.268281	57	2	8	47	A	synonymous_variant	LOW	Y32B12C.3	WBGene00012526	transcript	Y32B12C.3	protein_coding
V	16614699	C	[T]	{C, T}	0.140351	1	TRUE	FALSE	TRUE	0.24344	57	2	7	48	T	synonymous_variant	LOW	Y32B12C.3	WBGene00012526	transcript	Y32B12C.3	protein_coding
V	16614702	T	[G, A]	{G, A, T}	0.403509	1	TRUE	FALSE	FALSE	0.485639	57	2	22	33	A	synonymous_variant	LOW	Y32B12C.3	WBGene00012526	transcript	Y32B12C.3	protein_coding
V	16614756	G	[C]	{G, C}	0.149123	1	TRUE	FALSE	FALSE	0.256016	57	1	8	48	C	synonymous_variant	LOW	Y32B12C.3	WBGene00012526	transcript	Y32B12C.3	protein_coding
V	16617767	T	[A]	{A, T}	0.0377358	0.929825	TRUE	FALSE	FALSE	0.0733154	53	0	2	51	A	synonymous_variant	LOW	Y70C5A.4	WBGene00194799	transcript	Y70C5A.4	protein_coding
V	16617791	C	[A]	{A, C}	0.122807	1	TRUE	FALSE	FALSE	0.217358	57	0	7	50	A	synonymous_variant	LOW	Y70C5A.4	WBGene00194799	transcript	Y70C5A.4	protein_coding
V	16618383	T	[G]	{G, T}	0.0350877	1	TRUE	FALSE	FALSE	0.0683124	57	0	2	55	G	synonymous_variant	LOW	Y70C5A.3	WBGene00050904	transcript	Y70C5A.3	protein_coding
V	16618410	A	[G]	{G, A}	0.0526316	1	TRUE	FALSE	TRUE	0.100605	57	4	1	52	G	synonymous_variant	LOW	Y70C5A.3	WBGene00050904	transcript	Y70C5A.3	protein_coding
V	16618442	G	[T]	{G, T}	0.280702	1	TRUE	FALSE	FALSE	0.40739	57	2	15	40	T	synonymous_variant	LOW	Y70C5A.3	WBGene00050904	transcript	Y70C5A.3	protein_coding
V	16618446	C	[T]	{C, T}	0.307018	1	TRUE	FALSE	TRUE	0.429281	57	5	15	37	T	synonymous_variant	LOW	Y70C5A.3	WBGene00050904	transcript	Y70C5A.3	protein_coding
V	16618476	G	[A]	{G, A}	0.403509	1	TRUE	FALSE	TRUE	0.485639	57	0	23	34	A	synonymous_variant	LOW	Y70C5A.3	WBGene00050904	transcript	Y70C5A.3	protein_coding
V	16618482	C	[T]	{C, T}	0.0175439	1	TRUE	FALSE	TRUE	0.0347772	57	0	1	56	T	synonymous_variant	LOW	Y70C5A.3	WBGene00050904	transcript	Y70C5A.3	protein_coding
V	16618491	A	[G]	{G, A}	0.403509	1	TRUE	FALSE	TRUE	0.485639	57	2	22	33	G	synonymous_variant	LOW	Y70C5A.3	WBGene00050904	transcript	Y70C5A.3	protein_coding
V	16618494	A	[G]	{G, A}	0.403509	1	TRUE	FALSE	TRUE	0.485639	57	0	23	34	G	synonymous_variant	LOW	Y70C5A.3	WBGene00050904	transcript	Y70C5A.3	protein_coding
V	16618500	A	[G]	{G, A}	0.0438596	1	TRUE	FALSE	TRUE	0.0846142	57	3	1	53	G	synonymous_variant	LOW	Y70C5A.3	WBGene00050904	transcript	Y70C5A.3	protein_coding
V	16618515	T	[C]	{C, T}	0.160714	0.982456	TRUE	FALSE	TRUE	0.272201	56	0	9	47	C	synonymous_variant	LOW	Y70C5A.3	WBGene00050904	transcript	Y70C5A.3	protein_coding
V	16618521	T	[A, G]	{G, A, T}	0.178571	0.982456	TRUE	FALSE	FALSE	0.29601	56	2	9	45	A	synonymous_variant	LOW	Y70C5A.3	WBGene00050904	transcript	Y70C5A.3	protein_coding
V	16618524	A	[C, T]	{A, C, T}	0.181818	0.964912	TRUE	FALSE	FALSE	0.30025	55	2	9	44	C	synonymous_variant	LOW	Y70C5A.3	WBGene00050904	transcript	Y70C5A.3	protein_coding
V	16618533	C	[A, T]	{A, C, T}	0.289474	1	TRUE	FALSE	FALSE	0.414998	57	3	15	39	A	synonymous_variant	LOW	Y70C5A.3	WBGene00050904	transcript	Y70C5A.3	protein_coding
V	16618542	A	[G]	{G, A}	0.280702	1	TRUE	FALSE	TRUE	0.40739	57	2	15	40	G	synonymous_variant	LOW	Y70C5A.3	WBGene00050904	transcript	Y70C5A.3	protein_coding
V	16618551	G	[A]	{G, A}	0.0789474	1	TRUE	FALSE	TRUE	0.146716	57	3	3	51	A	synonymous_variant	LOW	Y70C5A.3	WBGene00050904	transcript	Y70C5A.3	protein_coding
V	16618566	T	[A]	{A, T}	0.342105	1	TRUE	FALSE	FALSE	0.454122	57	3	18	36	A	synonymous_variant	LOW	Y70C5A.3	WBGene00050904	transcript	Y70C5A.3	protein_coding
V	16618608	C	[T]	{C, T}	0.0263158	1	TRUE	FALSE	TRUE	0.0517	57	1	1	55	T	synonymous_variant	LOW	Y70C5A.3	WBGene00050904	transcript	Y70C5A.3	protein_coding
V	16618631	G	[A]	{G, A}	0.307018	1	TRUE	FALSE	TRUE	0.429281	57	5	15	37	A	synonymous_variant	LOW	Y70C5A.3	WBGene00050904	transcript	Y70C5A.3	protein_coding
V	16618693	A	[G]	{G, A}	0.368421	1	TRUE	FALSE	TRUE	0.469492	57	0	21	36	G	synonymous_variant	LOW	Y70C5A.3	WBGene00050904	transcript	Y70C5A.3	protein_coding
V	16618696	T	[G, C]	{C, T}	0.263158	1	TRUE	FALSE	FALSE	0.391244	57	0	15	42	C	synonymous_variant	LOW	Y70C5A.3	WBGene00050904	transcript	Y70C5A.3	protein_coding
V	16618702	G	[A]	{G, A}	0.350877	1	TRUE	FALSE	TRUE	0.459556	57	0	20	37	A	synonymous_variant	LOW	Y70C5A.3	WBGene00050904	transcript	Y70C5A.3	protein_coding
V	16618708	T	[C]	{C, T}	0.350877	1	TRUE	FALSE	TRUE	0.459556	57	0	20	37	C	synonymous_variant	LOW	Y70C5A.3	WBGene00050904	transcript	Y70C5A.3	protein_coding
V	16618714	A	[C, G]	{A, C}	0.263158	1	TRUE	FALSE	FALSE	0.391244	57	0	15	42	C	synonymous_variant	LOW	Y70C5A.3	WBGene00050904	transcript	Y70C5A.3	protein_coding
V	16618723	T	[A]	{A, T}	0.298246	1	TRUE	FALSE	FALSE	0.422295	57	0	17	40	A	synonymous_variant	LOW	Y70C5A.3	WBGene00050904	transcript	Y70C5A.3	protein_coding
V	16618726	G	[A]	{G, A}	0.140351	1	TRUE	FALSE	TRUE	0.24344	57	0	8	49	A	synonymous_variant	LOW	Y70C5A.3	WBGene00050904	transcript	Y70C5A.3	protein_coding
V	16618735	G	[A]	{G, A}	0.263158	1	TRUE	FALSE	TRUE	0.391244	57	0	15	42	A	synonymous_variant	LOW	Y70C5A.3	WBGene00050904	transcript	Y70C5A.3	protein_coding
V	16618747	A	[G]	{G, A}	0.27193	1	TRUE	FALSE	TRUE	0.399472	57	1	15	41	G	synonymous_variant	LOW	Y70C5A.3	WBGene00050904	transcript	Y70C5A.3	protein_coding
V	16618765	T	[C]	{C, T}	0.0175439	1	TRUE	FALSE	TRUE	0.0347772	57	0	1	56	C	synonymous_variant	LOW	Y70C5A.3	WBGene00050904	transcript	Y70C5A.3	protein_coding
V	16618768	A	[G]	{G, A}	0.0175439	1	TRUE	FALSE	TRUE	0.0347772	57	0	1	56	G	synonymous_variant	LOW	Y70C5A.3	WBGene00050904	transcript	Y70C5A.3	protein_coding
V	16618780	T	[C]	{C, T}	0.315789	1	TRUE	FALSE	TRUE	0.435957	57	0	18	39	C	synonymous_variant	LOW	Y70C5A.3	WBGene00050904	transcript	Y70C5A.3	protein_coding
V	16618783	A	[C]	{A, C}	0.333333	1	TRUE	FALSE	FALSE	0.448378	57	0	19	38	C	synonymous_variant	LOW	Y70C5A.3	WBGene00050904	transcript	Y70C5A.3	protein_coding
V	16618786	C	[T]	{C, T}	0.245614	1	TRUE	FALSE	TRUE	0.373855	57	0	14	43	T	synonymous_variant	LOW	Y70C5A.3	WBGene00050904	transcript	Y70C5A.3	protein_coding
V	16618795	T	[A, C]	{A, T}	0.245614	1	TRUE	FALSE	FALSE	0.373855	57	0	14	43	A	synonymous_variant	LOW	Y70C5A.3	WBGene00050904	transcript	Y70C5A.3	protein_coding
V	16618798	T	[C]	{C, T}	0.245614	1	TRUE	FALSE	TRUE	0.373855	57	0	14	43	C	synonymous_variant	LOW	Y70C5A.3	WBGene00050904	transcript	Y70C5A.3	protein_coding
V	16618819	A	[G]	{G, A}	0.298246	1	TRUE	FALSE	TRUE	0.422295	57	0	17	40	G	synonymous_variant	LOW	Y70C5A.3	WBGene00050904	transcript	Y70C5A.3	protein_coding
V	16618837	A	[G]	{G, A}	0.298246	1	TRUE	FALSE	TRUE	0.422295	57	0	17	40	G	synonymous_variant	LOW	Y70C5A.3	WBGene00050904	transcript	Y70C5A.3	protein_coding
V	16618840	G	[A]	{G, A}	0.0175439	1	TRUE	FALSE	TRUE	0.0347772	57	0	1	56	A	synonymous_variant	LOW	Y70C5A.3	WBGene00050904	transcript	Y70C5A.3	protein_coding
V	16618843	G	[A]	{G, A}	0.0175439	1	TRUE	FALSE	TRUE	0.0347772	57	0	1	56	A	synonymous_variant	LOW	Y70C5A.3	WBGene00050904	transcript	Y70C5A.3	protein_coding
V	16618918	C	[T]	{C, T}	0.315789	1	TRUE	FALSE	TRUE	0.435957	57	0	18	39	T	synonymous_variant	LOW	Y70C5A.3	WBGene00050904	transcript	Y70C5A.3	protein_coding
V	16618923	G	[A]	{G, A}	0.339286	0.982456	TRUE	FALSE	TRUE	0.452381	56	0	19	37	A	synonymous_variant	LOW	Y70C5A.3	WBGene00050904	transcript	Y70C5A.3	protein_coding
V	16618945	A	[G]	{G, A}	0.298246	1	TRUE	FALSE	TRUE	0.422295	57	0	17	40	G	synonymous_variant	LOW	Y70C5A.3	WBGene00050904	transcript	Y70C5A.3	protein_coding
V	16618951	C	[T, G]	{C, T}	0.298246	1	TRUE	FALSE	FALSE	0.422295	57	0	17	40	G	synonymous_variant	LOW	Y70C5A.3	WBGene00050904	transcript	Y70C5A.3	protein_coding
V	16618963	A	[G]	{G, A}	0.0526316	1	TRUE	FALSE	TRUE	0.100605	57	0	3	54	G	synonymous_variant	LOW	Y70C5A.3	WBGene00050904	transcript	Y70C5A.3	protein_coding
V	16618969	T	[C]	{C, T}	0.350877	1	TRUE	FALSE	TRUE	0.459556	57	0	20	37	C	synonymous_variant	LOW	Y70C5A.3	WBGene00050904	transcript	Y70C5A.3	protein_coding
V	16618987	C	[T]	{C, T}	0.298246	1	TRUE	FALSE	TRUE	0.422295	57	0	17	40	T	synonymous_variant	LOW	Y70C5A.3	WBGene00050904	transcript	Y70C5A.3	protein_coding
V	16618999	A	[T]	{A, T}	0.0701754	1	TRUE	FALSE	FALSE	0.131657	57	0	4	53	T	synonymous_variant	LOW	Y70C5A.3	WBGene00050904	transcript	Y70C5A.3	protein_coding
V	16619016	A	[G]	{G, A}	0.298246	1	TRUE	FALSE	TRUE	0.422295	57	0	17	40	G	synonymous_variant	LOW	Y70C5A.3	WBGene00050904	transcript	Y70C5A.3	protein_coding
V	16619026	C	[T]	{C, T}	0.0526316	1	TRUE	FALSE	TRUE	0.100605	57	0	3	54	T	synonymous_variant	LOW	Y70C5A.3	WBGene00050904	transcript	Y70C5A.3	protein_coding
V	16619047	T	[A]	{A, T}	0.368421	1	TRUE	FALSE	FALSE	0.469492	57	0	21	36	A	synonymous_variant	LOW	Y70C5A.3	WBGene00050904	transcript	Y70C5A.3	protein_coding
V	16619050	A	[G]	{G, A}	0.298246	1	TRUE	FALSE	TRUE	0.422295	57	0	17	40	G	synonymous_variant	LOW	Y70C5A.3	WBGene00050904	transcript	Y70C5A.3	protein_coding
V	16619053	T	[C]	{C, T}	0.298246	1	TRUE	FALSE	TRUE	0.422295	57	0	17	40	C	synonymous_variant	LOW	Y70C5A.3	WBGene00050904	transcript	Y70C5A.3	protein_coding
V	16619080	C	[T]	{C, T}	0.350877	1	TRUE	FALSE	TRUE	0.459556	57	0	20	37	T	synonymous_variant	LOW	Y70C5A.3	WBGene00050904	transcript	Y70C5A.3	protein_coding
V	16619095	T	[A, G]	{G, A, T}	0.421053	1	TRUE	FALSE	FALSE	0.491849	57	0	24	33	A	synonymous_variant	LOW	Y70C5A.3	WBGene00050904	transcript	Y70C5A.3	protein_coding
V	16619098	G	[A]	{G, A}	0.298246	1	TRUE	FALSE	TRUE	0.422295	57	0	17	40	A	synonymous_variant	LOW	Y70C5A.3	WBGene00050904	transcript	Y70C5A.3	protein_coding
V	16619110	A	[G]	{G, A}	0.315789	1	TRUE	FALSE	TRUE	0.435957	57	0	18	39	G	synonymous_variant	LOW	Y70C5A.3	WBGene00050904	transcript	Y70C5A.3	protein_coding
V	16619146	A	[C]	{A, C}	0.298246	1	TRUE	FALSE	FALSE	0.422295	57	0	17	40	C	synonymous_variant	LOW	Y70C5A.3	WBGene00050904	transcript	Y70C5A.3	protein_coding
V	16619167	A	[G]	{G, A}	0.368421	1	TRUE	FALSE	TRUE	0.469492	57	0	21	36	G	synonymous_variant	LOW	Y70C5A.3	WBGene00050904	transcript	Y70C5A.3	protein_coding
V	16619182	C	[A]	{A, C}	0.298246	1	TRUE	FALSE	FALSE	0.422295	57	0	17	40	A	synonymous_variant	LOW	Y70C5A.3	WBGene00050904	transcript	Y70C5A.3	protein_coding
V	16619209	C	[G]	{G, C}	0.0526316	1	TRUE	FALSE	FALSE	0.100605	57	0	3	54	G	synonymous_variant	LOW	Y70C5A.3	WBGene00050904	transcript	Y70C5A.3	protein_coding
V	16619221	C	[T]	{C, T}	0.0877193	1	TRUE	FALSE	TRUE	0.161466	57	0	5	52	T	synonymous_variant	LOW	Y70C5A.3	WBGene00050904	transcript	Y70C5A.3	protein_coding
V	16619224	G	[A]	{G, A}	0.140351	1	TRUE	FALSE	TRUE	0.24344	57	0	8	49	A	synonymous_variant	LOW	Y70C5A.3	WBGene00050904	transcript	Y70C5A.3	protein_coding
V	16619257	T	[C]	{C, T}	0.375	0.982456	TRUE	FALSE	TRUE	0.472973	56	0	21	35	C	synonymous_variant	LOW	Y70C5A.3	WBGene00050904	transcript	Y70C5A.3	protein_coding
V	16619311	T	[G]	{G, T}	0.0178571	0.982456	TRUE	FALSE	FALSE	0.0353925	56	0	1	55	G	synonymous_variant	LOW	Y70C5A.3	WBGene00050904	transcript	Y70C5A.3	protein_coding
V	16619361	G	[T]	{G, T}	0.303571	0.982456	TRUE	FALSE	FALSE	0.426641	56	0	17	39	T	synonymous_variant	LOW	Y70C5A.3	WBGene00050904	transcript	Y70C5A.3	protein_coding
V	16619398	A	[G]	{G, A}	0.285714	0.982456	TRUE	FALSE	TRUE	0.41184	56	0	16	40	G	synonymous_variant	LOW	Y70C5A.3	WBGene00050904	transcript	Y70C5A.3	protein_coding
V	16619416	C	[T]	{C, T}	0.0178571	0.982456	TRUE	FALSE	TRUE	0.0353925	56	0	1	55	T	synonymous_variant	LOW	Y70C5A.3	WBGene00050904	transcript	Y70C5A.3	protein_coding
V	16619431	G	[A]	{G, A}	0.0178571	0.982456	TRUE	FALSE	TRUE	0.0353925	56	0	1	55	A	synonymous_variant	LOW	Y70C5A.3	WBGene00050904	transcript	Y70C5A.3	protein_coding
V	16619437	A	[G]	{G, A}	0.303571	0.982456	TRUE	FALSE	TRUE	0.426641	56	0	17	39	G	synonymous_variant	LOW	Y70C5A.3	WBGene00050904	transcript	Y70C5A.3	protein_coding
V	16619452	G	[A]	{G, A}	0.0178571	0.982456	TRUE	FALSE	TRUE	0.0353925	56	0	1	55	A	synonymous_variant	LOW	Y70C5A.3	WBGene00050904	transcript	Y70C5A.3	protein_coding
V	16619470	C	[T]	{C, T}	0.303571	0.982456	TRUE	FALSE	TRUE	0.426641	56	0	17	39	T	synonymous_variant	LOW	Y70C5A.3	WBGene00050904	transcript	Y70C5A.3	protein_coding
V	16619473	G	[A]	{G, A}	0.303571	0.982456	TRUE	FALSE	TRUE	0.426641	56	0	17	39	A	synonymous_variant	LOW	Y70C5A.3	WBGene00050904	transcript	Y70C5A.3	protein_coding
V	16619518	C	[T]	{C, T}	0.315789	1	TRUE	FALSE	TRUE	0.435957	57	0	18	39	T	synonymous_variant	LOW	Y70C5A.3	WBGene00050904	transcript	Y70C5A.3	protein_coding
V	16619616	A	[G]	{G, A}	0.0178571	0.982456	TRUE	FALSE	TRUE	0.0353925	56	0	1	55	G	synonymous_variant	LOW	Y70C5A.3	WBGene00050904	transcript	Y70C5A.3	protein_coding
V	16619649	A	[G]	{G, A}	0.303571	0.982456	TRUE	FALSE	TRUE	0.426641	56	0	17	39	G	synonymous_variant	LOW	Y70C5A.3	WBGene00050904	transcript	Y70C5A.3	protein_coding
V	16619658	T	[C]	{C, T}	0.0178571	0.982456	TRUE	FALSE	TRUE	0.0353925	56	0	1	55	C	synonymous_variant	LOW	Y70C5A.3	WBGene00050904	transcript	Y70C5A.3	protein_coding
V	16619673	G	[A]	{G, A}	0.0178571	0.982456	TRUE	FALSE	TRUE	0.0353925	56	0	1	55	A	splice_region_variant&synonymous_variant	LOW	Y70C5A.3	WBGene00050904	transcript	Y70C5A.3	protein_coding
V	16620013	C	[T]	{C, T}	0.0535714	0.982456	TRUE	FALSE	TRUE	0.102317	56	0	3	53	T	synonymous_variant	LOW	Y70C5A.3	WBGene00050904	transcript	Y70C5A.3	protein_coding
V	16620067	A	[G]	{G, A}	0.303571	0.982456	TRUE	FALSE	TRUE	0.426641	56	0	17	39	G	synonymous_variant	LOW	Y70C5A.3	WBGene00050904	transcript	Y70C5A.3	protein_coding
V	16620076	T	[C]	{C, T}	0.303571	0.982456	TRUE	FALSE	TRUE	0.426641	56	0	17	39	C	synonymous_variant	LOW	Y70C5A.3	WBGene00050904	transcript	Y70C5A.3	protein_coding
V	16620100	G	[A]	{G, A}	0.321429	0.982456	TRUE	FALSE	TRUE	0.440154	56	0	18	38	A	synonymous_variant	LOW	Y70C5A.3	WBGene00050904	transcript	Y70C5A.3	protein_coding
V	16620109	A	[C]	{A, C}	0.303571	0.982456	TRUE	FALSE	FALSE	0.426641	56	0	17	39	C	synonymous_variant	LOW	Y70C5A.3	WBGene00050904	transcript	Y70C5A.3	protein_coding
V	16620112	C	[G]	{G, C}	0.0535714	0.982456	TRUE	FALSE	FALSE	0.102317	56	0	3	53	G	synonymous_variant	LOW	Y70C5A.3	WBGene00050904	transcript	Y70C5A.3	protein_coding
V	16620118	A	[G]	{G, A}	0.0714286	0.982456	TRUE	FALSE	TRUE	0.133848	56	0	4	52	G	synonymous_variant	LOW	Y70C5A.3	WBGene00050904	transcript	Y70C5A.3	protein_coding
V	16620150	G	[A]	{G, A}	0.0535714	0.982456	TRUE	FALSE	TRUE	0.102317	56	0	3	53	A	splice_region_variant&intron_variant	LOW	Y70C5A.3	WBGene00050904	transcript	Y70C5A.3	protein_coding
V	16620154	A	[C]	{A, C}	0.366071	0.982456	TRUE	FALSE	FALSE	0.468308	56	1	20	35	C	splice_region_variant&intron_variant	LOW	Y70C5A.3	WBGene00050904	transcript	Y70C5A.3	protein_coding
V	16620182	A	[T]	{A, T}	0.375	0.982456	TRUE	FALSE	FALSE	0.472973	56	0	21	35	T	splice_region_variant&intron_variant	LOW	Y70C5A.3	WBGene00050904	transcript	Y70C5A.3	protein_coding
V	16620197	T	[A]	{A, T}	0.357143	0.982456	TRUE	FALSE	FALSE	0.46332	56	0	20	36	A	synonymous_variant	LOW	Y70C5A.3	WBGene00050904	transcript	Y70C5A.3	protein_coding
V	16620251	T	[C]	{C, T}	0.137255	0.894737	TRUE	FALSE	TRUE	0.239177	51	0	7	44	C	synonymous_variant	LOW	Y70C5A.3	WBGene00050904	transcript	Y70C5A.3	protein_coding
V	16620272	T	[C]	{C, T}	0.0526316	1	TRUE	FALSE	TRUE	0.100605	57	0	3	54	C	synonymous_variant	LOW	Y70C5A.3	WBGene00050904	transcript	Y70C5A.3	protein_coding
V	16620278	T	[C]	{C, T}	0.350877	1	TRUE	FALSE	TRUE	0.459556	57	0	20	37	C	synonymous_variant	LOW	Y70C5A.3	WBGene00050904	transcript	Y70C5A.3	protein_coding
V	16620311	C	[G, A]	{G, C}	0.350877	1	TRUE	FALSE	FALSE	0.459556	57	0	20	37	A	synonymous_variant	LOW	Y70C5A.3	WBGene00050904	transcript	Y70C5A.3	protein_coding
V	16620389	C	[T]	{C, T}	0.267857	0.982456	TRUE	FALSE	TRUE	0.395753	56	0	15	41	T	synonymous_variant	LOW	Y70C5A.3	WBGene00050904	transcript	Y70C5A.3	protein_coding
V	16620422	C	[T]	{C, T}	0.0175439	1	TRUE	FALSE	TRUE	0.0347772	57	0	1	56	T	synonymous_variant	LOW	Y70C5A.3	WBGene00050904	transcript	Y70C5A.3	protein_coding
V	16620434	T	[C]	{C, T}	0.385965	1	TRUE	FALSE	TRUE	0.478187	57	0	22	35	C	synonymous_variant	LOW	Y70C5A.3	WBGene00050904	transcript	Y70C5A.3	protein_coding
V	16620446	T	[C]	{C, T}	0.0175439	1	TRUE	FALSE	TRUE	0.0347772	57	0	1	56	C	synonymous_variant	LOW	Y70C5A.3	WBGene00050904	transcript	Y70C5A.3	protein_coding
V	16620479	G	[A]	{G, A}	0.298246	1	TRUE	FALSE	TRUE	0.422295	57	0	17	40	A	synonymous_variant	LOW	Y70C5A.3	WBGene00050904	transcript	Y70C5A.3	protein_coding
V	16620485	T	[G]	{G, T}	0.298246	1	TRUE	FALSE	FALSE	0.422295	57	0	17	40	G	synonymous_variant	LOW	Y70C5A.3	WBGene00050904	transcript	Y70C5A.3	protein_coding
V	16620494	C	[T]	{C, T}	0.298246	1	TRUE	FALSE	TRUE	0.422295	57	0	17	40	T	synonymous_variant	LOW	Y70C5A.3	WBGene00050904	transcript	Y70C5A.3	protein_coding
V	16620503	A	[G]	{G, A}	0.0526316	1	TRUE	FALSE	TRUE	0.100605	57	0	3	54	G	synonymous_variant	LOW	Y70C5A.3	WBGene00050904	transcript	Y70C5A.3	protein_coding
V	16620518	A	[G, T]	{G, A, T}	0.333333	1	TRUE	FALSE	FALSE	0.448378	57	0	19	38	G	synonymous_variant	LOW	Y70C5A.3	WBGene00050904	transcript	Y70C5A.3	protein_coding
V	16620523	A	[G]	{G, A}	0.298246	1	TRUE	FALSE	TRUE	0.422295	57	0	17	40	G	synonymous_variant	LOW	Y70C5A.3	WBGene00050904	transcript	Y70C5A.3	protein_coding
V	16620557	G	[A]	{G, A}	0.303571	0.982456	TRUE	FALSE	TRUE	0.426641	56	0	17	39	A	synonymous_variant	LOW	Y70C5A.3	WBGene00050904	transcript	Y70C5A.3	protein_coding
V	16620578	T	[C]	{C, T}	0.298246	1	TRUE	FALSE	TRUE	0.422295	57	0	17	40	C	synonymous_variant	LOW	Y70C5A.3	WBGene00050904	transcript	Y70C5A.3	protein_coding
V	16620584	T	[A]	{A, T}	0.0701754	1	TRUE	FALSE	FALSE	0.131657	57	0	4	53	A	synonymous_variant	LOW	Y70C5A.3	WBGene00050904	transcript	Y70C5A.3	protein_coding
V	16620599	G	[A]	{G, A}	0.0175439	1	TRUE	FALSE	TRUE	0.0347772	57	0	1	56	A	synonymous_variant	LOW	Y70C5A.3	WBGene00050904	transcript	Y70C5A.3	protein_coding
V	16620608	C	[T]	{C, T}	0.0526316	1	TRUE	FALSE	TRUE	0.100605	57	0	3	54	T	synonymous_variant	LOW	Y70C5A.3	WBGene00050904	transcript	Y70C5A.3	protein_coding
V	16620623	A	[T]	{A, T}	0.359649	1	TRUE	FALSE	FALSE	0.464679	57	1	20	36	T	synonymous_variant	LOW	Y70C5A.3	WBGene00050904	transcript	Y70C5A.3	protein_coding
V	16620644	T	[G]	{G, T}	0.298246	1	TRUE	FALSE	FALSE	0.422295	57	0	17	40	G	synonymous_variant	LOW	Y70C5A.3	WBGene00050904	transcript	Y70C5A.3	protein_coding
V	16620656	T	[C]	{C, T}	0.350877	1	TRUE	FALSE	TRUE	0.459556	57	0	20	37	C	synonymous_variant	LOW	Y70C5A.3	WBGene00050904	transcript	Y70C5A.3	protein_coding
V	16620740	A	[G]	{G, A}	0.298246	1	TRUE	FALSE	TRUE	0.422295	57	0	17	40	G	synonymous_variant	LOW	Y70C5A.3	WBGene00050904	transcript	Y70C5A.3	protein_coding
V	16620745	G	[A]	{G, A}	0.350877	1	TRUE	FALSE	TRUE	0.459556	57	0	20	37	A	synonymous_variant	LOW	Y70C5A.3	WBGene00050904	transcript	Y70C5A.3	protein_coding
V	16620782	G	[A]	{G, A}	0.185185	0.947368	TRUE	FALSE	TRUE	0.304604	54	0	10	44	A	synonymous_variant	LOW	Y70C5A.3	WBGene00050904	transcript	Y70C5A.3	protein_coding
V	16620791	A	[G]	{G, A}	0.175926	0.947368	TRUE	FALSE	TRUE	0.292662	54	1	9	44	G	synonymous_variant	LOW	Y70C5A.3	WBGene00050904	transcript	Y70C5A.3	protein_coding
V	16620809	C	[A]	{A, C}	0.298246	1	TRUE	FALSE	FALSE	0.422295	57	0	17	40	A	synonymous_variant	LOW	Y70C5A.3	WBGene00050904	transcript	Y70C5A.3	protein_coding
V	16620821	T	[C]	{C, T}	0.315789	1	TRUE	FALSE	TRUE	0.435957	57	0	18	39	C	synonymous_variant	LOW	Y70C5A.3	WBGene00050904	transcript	Y70C5A.3	protein_coding
V	16620836	T	[C]	{C, T}	0.298246	1	TRUE	FALSE	TRUE	0.422295	57	0	17	40	C	synonymous_variant	LOW	Y70C5A.3	WBGene00050904	transcript	Y70C5A.3	protein_coding
V	16620854	T	[C]	{C, T}	0.298246	1	TRUE	FALSE	TRUE	0.422295	57	0	17	40	C	synonymous_variant	LOW	Y70C5A.3	WBGene00050904	transcript	Y70C5A.3	protein_coding
V	16620860	G	[T]	{G, T}	0.0175439	1	TRUE	FALSE	FALSE	0.0347772	57	0	1	56	T	synonymous_variant	LOW	Y70C5A.3	WBGene00050904	transcript	Y70C5A.3	protein_coding
V	16621399	C	[A]	{A, C}	0.0175439	1	TRUE	FALSE	FALSE	0.0347772	57	0	1	56	A	synonymous_variant	LOW	Y70C5A.2	WBGene00013490	transcript	Y70C5A.2	protein_coding
V	16621438	T	[C]	{C, T}	0.315789	1	TRUE	FALSE	TRUE	0.435957	57	0	18	39	C	synonymous_variant	LOW	Y70C5A.2	WBGene00013490	transcript	Y70C5A.2	protein_coding
V	16621441	T	[A]	{A, T}	0.0175439	1	TRUE	FALSE	FALSE	0.0347772	57	0	1	56	A	synonymous_variant	LOW	Y70C5A.2	WBGene00013490	transcript	Y70C5A.2	protein_coding
V	16621447	A	[G]	{G, A}	0.368421	1	TRUE	FALSE	TRUE	0.469492	57	0	21	36	G	synonymous_variant	LOW	Y70C5A.2	WBGene00013490	transcript	Y70C5A.2	protein_coding
V	16621468	A	[C]	{A, C}	0.0526316	1	TRUE	FALSE	FALSE	0.100605	57	0	3	54	C	synonymous_variant	LOW	Y70C5A.2	WBGene00013490	transcript	Y70C5A.2	protein_coding
V	16621471	G	[A]	{G, A}	0.0526316	1	TRUE	FALSE	TRUE	0.100605	57	0	3	54	A	synonymous_variant	LOW	Y70C5A.2	WBGene00013490	transcript	Y70C5A.2	protein_coding
V	16621477	A	[G]	{G, A}	0.0526316	1	TRUE	FALSE	TRUE	0.100605	57	0	3	54	G	synonymous_variant	LOW	Y70C5A.2	WBGene00013490	transcript	Y70C5A.2	protein_coding
V	16621480	T	[C]	{C, T}	0.298246	1	TRUE	FALSE	TRUE	0.422295	57	0	17	40	C	synonymous_variant	LOW	Y70C5A.2	WBGene00013490	transcript	Y70C5A.2	protein_coding
V	16621489	T	[C]	{C, T}	0.298246	1	TRUE	FALSE	TRUE	0.422295	57	0	17	40	C	synonymous_variant	LOW	Y70C5A.2	WBGene00013490	transcript	Y70C5A.2	protein_coding
V	16621491	G	[T]	{G, T}	0.0526316	1	TRUE	FALSE	FALSE	0.100605	57	0	3	54	T	synonymous_variant	LOW	Y70C5A.2	WBGene00013490	transcript	Y70C5A.2	protein_coding
V	16621492	A	[G]	{G, A}	0.421053	1	TRUE	FALSE	TRUE	0.491849	57	0	24	33	G	synonymous_variant	LOW	Y70C5A.2	WBGene00013490	transcript	Y70C5A.2	protein_coding
V	16621495	G	[C]	{G, C}	0.0526316	1	TRUE	FALSE	FALSE	0.100605	57	0	3	54	C	synonymous_variant	LOW	Y70C5A.2	WBGene00013490	transcript	Y70C5A.2	protein_coding
V	16621498	T	[C]	{C, T}	0.0526316	1	TRUE	FALSE	TRUE	0.100605	57	0	3	54	C	synonymous_variant	LOW	Y70C5A.2	WBGene00013490	transcript	Y70C5A.2	protein_coding
V	16621501	T	[C]	{C, T}	0.0526316	1	TRUE	FALSE	TRUE	0.100605	57	0	3	54	C	synonymous_variant	LOW	Y70C5A.2	WBGene00013490	transcript	Y70C5A.2	protein_coding
V	16621504	T	[A]	{A, T}	0.0526316	1	TRUE	FALSE	FALSE	0.100605	57	0	3	54	A	synonymous_variant	LOW	Y70C5A.2	WBGene00013490	transcript	Y70C5A.2	protein_coding
V	16621507	G	[A]	{G, A}	0.0175439	1	TRUE	FALSE	TRUE	0.0347772	57	0	1	56	A	splice_region_variant&synonymous_variant	LOW	Y70C5A.2	WBGene00013490	transcript	Y70C5A.2	protein_coding
V	16621511	G	[A]	{G, A}	0.0526316	1	TRUE	FALSE	TRUE	0.100605	57	0	3	54	A	splice_region_variant&intron_variant	LOW	Y70C5A.2	WBGene00013490	transcript	Y70C5A.2	protein_coding
V	16621512	A	[G]	{G, A}	0.298246	1	TRUE	FALSE	TRUE	0.422295	57	0	17	40	G	splice_region_variant&intron_variant	LOW	Y70C5A.2	WBGene00013490	transcript	Y70C5A.2	protein_coding
V	16621514	A	[C]	{A, C}	0.0526316	1	TRUE	FALSE	FALSE	0.100605	57	0	3	54	C	splice_region_variant&intron_variant	LOW	Y70C5A.2	WBGene00013490	transcript	Y70C5A.2	protein_coding
V	16621564	A	[G]	{G, A}	0.0175439	1	TRUE	FALSE	TRUE	0.0347772	57	0	1	56	G	synonymous_variant	LOW	Y70C5A.2	WBGene00013490	transcript	Y70C5A.2	protein_coding
V	16621579	A	[T]	{A, T}	0.368421	1	TRUE	FALSE	FALSE	0.469492	57	0	21	36	T	synonymous_variant	LOW	Y70C5A.2	WBGene00013490	transcript	Y70C5A.2	protein_coding
V	16621582	A	[T, C]	{A, C, T}	0.421053	1	TRUE	FALSE	FALSE	0.491849	57	0	24	33	C	synonymous_variant	LOW	Y70C5A.2	WBGene00013490	transcript	Y70C5A.2	protein_coding
V	16621615	T	[A, G]	{G, A, T}	0.421053	1	TRUE	FALSE	FALSE	0.491849	57	0	24	33	A	synonymous_variant	LOW	Y70C5A.2	WBGene00013490	transcript	Y70C5A.2	protein_coding
V	16621618	C	[T, A]	{C, T}	0.0526316	1	TRUE	FALSE	FALSE	0.100605	57	0	3	54	A	synonymous_variant	LOW	Y70C5A.2	WBGene00013490	transcript	Y70C5A.2	protein_coding
V	16621624	A	[T]	{A, T}	0.0526316	1	TRUE	FALSE	FALSE	0.100605	57	0	3	54	T	synonymous_variant	LOW	Y70C5A.2	WBGene00013490	transcript	Y70C5A.2	protein_coding
V	16621633	G	[A]	{G, A}	0.298246	1	TRUE	FALSE	TRUE	0.422295	57	0	17	40	A	synonymous_variant	LOW	Y70C5A.2	WBGene00013490	transcript	Y70C5A.2	protein_coding
V	16621639	C	[T]	{C, T}	0.421053	1	TRUE	FALSE	TRUE	0.491849	57	0	24	33	T	synonymous_variant	LOW	Y70C5A.2	WBGene00013490	transcript	Y70C5A.2	protein_coding
V	16621650	A	[G]	{G, A}	0.0952381	0.736842	TRUE	FALSE	TRUE	0.174412	42	0	4	38	G	synonymous_variant	LOW	Y70C5A.2	WBGene00013490	transcript	Y70C5A.2	protein_coding
V	16621651	A	[G]	{G, A}	0.0952381	0.736842	TRUE	FALSE	TRUE	0.174412	42	0	4	38	G	synonymous_variant	LOW	Y70C5A.2	WBGene00013490	transcript	Y70C5A.2	protein_coding
V	16621657	G	[T, A]	{G, A, T}	0.0952381	0.736842	TRUE	FALSE	FALSE	0.174412	42	0	4	38	A	synonymous_variant	LOW	Y70C5A.2	WBGene00013490	transcript	Y70C5A.2	protein_coding
V	16621662	A	[G]	{G, A}	0.0714286	0.736842	TRUE	FALSE	TRUE	0.134251	42	0	3	39	G	synonymous_variant	LOW	Y70C5A.2	WBGene00013490	transcript	Y70C5A.2	protein_coding
V	16621663	G	[C]	{G, C}	0.0714286	0.736842	TRUE	FALSE	FALSE	0.134251	42	0	3	39	C	synonymous_variant	LOW	Y70C5A.2	WBGene00013490	transcript	Y70C5A.2	protein_coding
V	16621675	T	[A]	{A, T}	0.0833333	0.736842	TRUE	FALSE	FALSE	0.154618	42	1	3	38	A	splice_region_variant&intron_variant	LOW	Y70C5A.2	WBGene00013490	transcript	Y70C5A.2	protein_coding
V	16621730	T	[C]	{C, T}	0.0526316	1	TRUE	FALSE	TRUE	0.100605	57	0	3	54	C	synonymous_variant	LOW	Y70C5A.2	WBGene00013490	transcript	Y70C5A.2	protein_coding
V	16621733	C	[T]	{C, T}	0.0175439	1	TRUE	FALSE	TRUE	0.0347772	57	0	1	56	T	synonymous_variant	LOW	Y70C5A.2	WBGene00013490	transcript	Y70C5A.2	protein_coding
V	16621742	C	[T, A, G]	{C, T}	0.298246	1	TRUE	FALSE	FALSE	0.422295	57	0	17	40	A	synonymous_variant	LOW	Y70C5A.2	WBGene00013490	transcript	Y70C5A.2	protein_coding
V	16621745	C	[T]	{C, T}	0.0526316	1	TRUE	FALSE	TRUE	0.100605	57	0	3	54	T	synonymous_variant	LOW	Y70C5A.2	WBGene00013490	transcript	Y70C5A.2	protein_coding
V	16621751	A	[G]	{G, A}	0.298246	1	TRUE	FALSE	TRUE	0.422295	57	0	17	40	G	synonymous_variant	LOW	Y70C5A.2	WBGene00013490	transcript	Y70C5A.2	protein_coding
V	16621757	G	[A]	{G, A}	0.0175439	1	TRUE	FALSE	TRUE	0.0347772	57	0	1	56	A	synonymous_variant	LOW	Y70C5A.2	WBGene00013490	transcript	Y70C5A.2	protein_coding
V	16621760	A	[G]	{G, A}	0.421053	1	TRUE	FALSE	TRUE	0.491849	57	0	24	33	G	synonymous_variant	LOW	Y70C5A.2	WBGene00013490	transcript	Y70C5A.2	protein_coding
V	16621772	G	[A]	{G, A}	0.298246	1	TRUE	FALSE	TRUE	0.422295	57	0	17	40	A	synonymous_variant	LOW	Y70C5A.2	WBGene00013490	transcript	Y70C5A.2	protein_coding
V	16621775	C	[T]	{C, T}	0.0175439	1	TRUE	FALSE	TRUE	0.0347772	57	0	1	56	T	synonymous_variant	LOW	Y70C5A.2	WBGene00013490	transcript	Y70C5A.2	protein_coding
V	16621777	A	[G]	{G, A}	0.421053	1	TRUE	FALSE	TRUE	0.491849	57	0	24	33	G	synonymous_variant	LOW	Y70C5A.2	WBGene00013490	transcript	Y70C5A.2	protein_coding
V	16621787	A	[G]	{G, A}	0.0526316	1	TRUE	FALSE	TRUE	0.100605	57	0	3	54	G	synonymous_variant	LOW	Y70C5A.2	WBGene00013490	transcript	Y70C5A.2	protein_coding
V	16621790	A	[G]	{G, A}	0.0526316	1	TRUE	FALSE	TRUE	0.100605	57	0	3	54	G	synonymous_variant	LOW	Y70C5A.2	WBGene00013490	transcript	Y70C5A.2	protein_coding
V	16621793	C	[G, A]	{G, C}	0.0526316	1	TRUE	FALSE	FALSE	0.100605	57	0	3	54	A	synonymous_variant	LOW	Y70C5A.2	WBGene00013490	transcript	Y70C5A.2	protein_coding
V	16621802	T	[C]	{C, T}	0.403509	1	TRUE	FALSE	TRUE	0.485639	57	0	23	34	C	synonymous_variant	LOW	Y70C5A.2	WBGene00013490	transcript	Y70C5A.2	protein_coding
V	16621805	A	[G]	{G, A}	0.403509	1	TRUE	FALSE	TRUE	0.485639	57	0	23	34	G	synonymous_variant	LOW	Y70C5A.2	WBGene00013490	transcript	Y70C5A.2	protein_coding
V	16621811	T	[C]	{C, T}	0.0175439	1	TRUE	FALSE	TRUE	0.0347772	57	0	1	56	C	synonymous_variant	LOW	Y70C5A.2	WBGene00013490	transcript	Y70C5A.2	protein_coding
V	16621823	A	[G]	{G, A}	0.0175439	1	TRUE	FALSE	TRUE	0.0347772	57	0	1	56	G	synonymous_variant	LOW	Y70C5A.2	WBGene00013490	transcript	Y70C5A.2	protein_coding
V	16621829	G	[T]	{G, T}	0.0526316	1	TRUE	FALSE	FALSE	0.100605	57	0	3	54	T	synonymous_variant	LOW	Y70C5A.2	WBGene00013490	transcript	Y70C5A.2	protein_coding
V	16621832	C	[T]	{C, T}	0.0526316	1	TRUE	FALSE	TRUE	0.100605	57	0	3	54	T	synonymous_variant	LOW	Y70C5A.2	WBGene00013490	transcript	Y70C5A.2	protein_coding
V	16621838	C	[T]	{C, T}	0.421053	1	TRUE	FALSE	TRUE	0.491849	57	0	24	33	T	synonymous_variant	LOW	Y70C5A.2	WBGene00013490	transcript	Y70C5A.2	protein_coding
V	16621844	A	[G]	{G, A}	0.421053	1	TRUE	FALSE	TRUE	0.491849	57	0	24	33	G	synonymous_variant	LOW	Y70C5A.2	WBGene00013490	transcript	Y70C5A.2	protein_coding
V	16621847	C	[T]	{C, T}	0.421053	1	TRUE	FALSE	TRUE	0.491849	57	0	24	33	T	synonymous_variant	LOW	Y70C5A.2	WBGene00013490	transcript	Y70C5A.2	protein_coding
V	16621850	C	[T]	{C, T}	0.0175439	1	TRUE	FALSE	TRUE	0.0347772	57	0	1	56	T	synonymous_variant	LOW	Y70C5A.2	WBGene00013490	transcript	Y70C5A.2	protein_coding
V	16621856	T	[A]	{A, T}	0.421053	1	TRUE	FALSE	FALSE	0.491849	57	0	24	33	A	synonymous_variant	LOW	Y70C5A.2	WBGene00013490	transcript	Y70C5A.2	protein_coding
V	16621868	G	[T]	{G, T}	0.350877	1	TRUE	FALSE	FALSE	0.459556	57	0	20	37	T	synonymous_variant	LOW	Y70C5A.2	WBGene00013490	transcript	Y70C5A.2	protein_coding
V	16621871	A	[G]	{G, A}	0.350877	1	TRUE	FALSE	TRUE	0.459556	57	0	20	37	G	synonymous_variant	LOW	Y70C5A.2	WBGene00013490	transcript	Y70C5A.2	protein_coding
V	16621874	C	[T]	{C, T}	0.0526316	1	TRUE	FALSE	TRUE	0.100605	57	0	3	54	T	synonymous_variant	LOW	Y70C5A.2	WBGene00013490	transcript	Y70C5A.2	protein_coding
V	16621877	T	[C]	{C, T}	0.0526316	1	TRUE	FALSE	TRUE	0.100605	57	0	3	54	C	synonymous_variant	LOW	Y70C5A.2	WBGene00013490	transcript	Y70C5A.2	protein_coding
V	16621880	A	[T, G]	{G, A, T}	0.315789	1	TRUE	FALSE	FALSE	0.435957	57	0	18	39	G	synonymous_variant	LOW	Y70C5A.2	WBGene00013490	transcript	Y70C5A.2	protein_coding
V	16621889	T	[A, G]	{A, T}	0.0175439	1	TRUE	FALSE	FALSE	0.0347772	57	0	1	56	A	synonymous_variant	LOW	Y70C5A.2	WBGene00013490	transcript	Y70C5A.2	protein_coding
V	16621895	T	[A]	{A, T}	0.0175439	1	TRUE	FALSE	FALSE	0.0347772	57	0	1	56	A	synonymous_variant	LOW	Y70C5A.2	WBGene00013490	transcript	Y70C5A.2	protein_coding
V	16621907	A	[G]	{G, A}	0.0175439	1	TRUE	FALSE	TRUE	0.0347772	57	0	1	56	G	synonymous_variant	LOW	Y70C5A.2	WBGene00013490	transcript	Y70C5A.2	protein_coding
V	16621919	G	[T]	{G, T}	0.298246	1	TRUE	FALSE	FALSE	0.422295	57	0	17	40	T	synonymous_variant	LOW	Y70C5A.2	WBGene00013490	transcript	Y70C5A.2	protein_coding
V	16621925	G	[A]	{G, A}	0.105263	1	TRUE	FALSE	TRUE	0.190033	57	0	6	51	A	synonymous_variant	LOW	Y70C5A.2	WBGene00013490	transcript	Y70C5A.2	protein_coding
V	16621937	G	[A]	{G, A}	0.0175439	1	TRUE	FALSE	TRUE	0.0347772	57	0	1	56	A	synonymous_variant	LOW	Y70C5A.2	WBGene00013490	transcript	Y70C5A.2	protein_coding
V	16621940	A	[T]	{A, T}	0.0175439	1	TRUE	FALSE	FALSE	0.0347772	57	0	1	56	T	synonymous_variant	LOW	Y70C5A.2	WBGene00013490	transcript	Y70C5A.2	protein_coding
V	16621943	A	[T]	{A, T}	0.421053	1	TRUE	FALSE	FALSE	0.491849	57	0	24	33	T	synonymous_variant	LOW	Y70C5A.2	WBGene00013490	transcript	Y70C5A.2	protein_coding
V	16621958	T	[A]	{A, T}	0.350877	1	TRUE	FALSE	FALSE	0.459556	57	0	20	37	A	synonymous_variant	LOW	Y70C5A.2	WBGene00013490	transcript	Y70C5A.2	protein_coding
V	16621961	T	[A]	{A, T}	0.421053	1	TRUE	FALSE	FALSE	0.491849	57	0	24	33	A	synonymous_variant	LOW	Y70C5A.2	WBGene00013490	transcript	Y70C5A.2	protein_coding
V	16621967	T	[A]	{A, T}	0.403509	1	TRUE	FALSE	FALSE	0.485639	57	0	23	34	A	synonymous_variant	LOW	Y70C5A.2	WBGene00013490	transcript	Y70C5A.2	protein_coding
V	16621973	C	[T]	{C, T}	0.0526316	1	TRUE	FALSE	TRUE	0.100605	57	0	3	54	T	synonymous_variant	LOW	Y70C5A.2	WBGene00013490	transcript	Y70C5A.2	protein_coding
V	16621979	T	[A]	{A, T}	0.368421	1	TRUE	FALSE	FALSE	0.469492	57	0	21	36	A	synonymous_variant	LOW	Y70C5A.2	WBGene00013490	transcript	Y70C5A.2	protein_coding
V	16621985	C	[G]	{G, C}	0.105263	1	TRUE	FALSE	FALSE	0.190033	57	0	6	51	G	synonymous_variant	LOW	Y70C5A.2	WBGene00013490	transcript	Y70C5A.2	protein_coding
V	16621991	G	[A]	{G, A}	0.0526316	1	TRUE	FALSE	TRUE	0.100605	57	0	3	54	A	synonymous_variant	LOW	Y70C5A.2	WBGene00013490	transcript	Y70C5A.2	protein_coding
V	16622000	T	[C]	{C, T}	0.368421	1	TRUE	FALSE	TRUE	0.469492	57	0	21	36	C	synonymous_variant	LOW	Y70C5A.2	WBGene00013490	transcript	Y70C5A.2	protein_coding
V	16622003	A	[G]	{G, A}	0.298246	1	TRUE	FALSE	TRUE	0.422295	57	0	17	40	G	synonymous_variant	LOW	Y70C5A.2	WBGene00013490	transcript	Y70C5A.2	protein_coding
V	16622012	A	[G]	{G, A}	0.368421	1	TRUE	FALSE	TRUE	0.469492	57	0	21	36	G	synonymous_variant	LOW	Y70C5A.2	WBGene00013490	transcript	Y70C5A.2	protein_coding
V	16622021	T	[G, A]	{G, T}	0.315789	1	TRUE	FALSE	FALSE	0.435957	57	0	18	39	A	synonymous_variant	LOW	Y70C5A.2	WBGene00013490	transcript	Y70C5A.2	protein_coding
V	16622024	T	[C]	{C, T}	0.315789	1	TRUE	FALSE	TRUE	0.435957	57	0	18	39	C	synonymous_variant	LOW	Y70C5A.2	WBGene00013490	transcript	Y70C5A.2	protein_coding
V	16622352	A	[T]	{A, T}	0.421053	1	TRUE	FALSE	FALSE	0.491849	57	0	24	33	T	splice_region_variant&intron_variant	LOW	Y70C5A.2	WBGene00013490	transcript	Y70C5A.2	protein_coding
V	16622395	T	[C]	{C, T}	0.403509	1	TRUE	FALSE	TRUE	0.485639	57	0	23	34	C	synonymous_variant	LOW	Y70C5A.2	WBGene00013490	transcript	Y70C5A.2	protein_coding
V	16622413	C	[T]	{C, T}	0.298246	1	TRUE	FALSE	TRUE	0.422295	57	0	17	40	T	synonymous_variant	LOW	Y70C5A.2	WBGene00013490	transcript	Y70C5A.2	protein_coding
V	16622419	C	[T]	{C, T}	0.298246	1	TRUE	FALSE	TRUE	0.422295	57	0	17	40	T	synonymous_variant	LOW	Y70C5A.2	WBGene00013490	transcript	Y70C5A.2	protein_coding
V	16622422	A	[G]	{G, A}	0.403509	1	TRUE	FALSE	TRUE	0.485639	57	0	23	34	G	synonymous_variant	LOW	Y70C5A.2	WBGene00013490	transcript	Y70C5A.2	protein_coding
V	16622439	A	[G]	{G, A}	0.298246	1	TRUE	FALSE	TRUE	0.422295	57	0	17	40	G	synonymous_variant	LOW	Y70C5A.2	WBGene00013490	transcript	Y70C5A.2	protein_coding
V	16622443	G	[A]	{G, A}	0.122807	1	TRUE	FALSE	TRUE	0.217358	57	0	7	50	A	synonymous_variant	LOW	Y70C5A.2	WBGene00013490	transcript	Y70C5A.2	protein_coding
V	16622446	G	[A]	{G, A}	0.298246	1	TRUE	FALSE	TRUE	0.422295	57	0	17	40	A	synonymous_variant	LOW	Y70C5A.2	WBGene00013490	transcript	Y70C5A.2	protein_coding
V	16622454	G	[A]	{G, A}	0.298246	1	TRUE	FALSE	TRUE	0.422295	57	0	17	40	A	synonymous_variant	LOW	Y70C5A.2	WBGene00013490	transcript	Y70C5A.2	protein_coding
V	16622475	A	[G]	{G, A}	0.0701754	1	TRUE	FALSE	TRUE	0.131657	57	0	4	53	G	synonymous_variant	LOW	Y70C5A.2	WBGene00013490	transcript	Y70C5A.2	protein_coding
V	16622479	G	[A]	{G, A}	0.0701754	1	TRUE	FALSE	TRUE	0.131657	57	0	4	53	A	synonymous_variant	LOW	Y70C5A.2	WBGene00013490	transcript	Y70C5A.2	protein_coding
V	16622482	A	[G]	{G, A}	0.0701754	1	TRUE	FALSE	TRUE	0.131657	57	0	4	53	G	synonymous_variant	LOW	Y70C5A.2	WBGene00013490	transcript	Y70C5A.2	protein_coding
V	16622503	A	[G]	{G, A}	0.0535714	0.982456	TRUE	FALSE	TRUE	0.102317	56	0	3	53	G	synonymous_variant	LOW	Y70C5A.2	WBGene00013490	transcript	Y70C5A.2	protein_coding
V	16622536	A	[G]	{G, A}	0.0701754	1	TRUE	FALSE	TRUE	0.131657	57	0	4	53	G	synonymous_variant	LOW	Y70C5A.2	WBGene00013490	transcript	Y70C5A.2	protein_coding
V	16622560	C	[G]	{G, C}	0.0350877	1	TRUE	FALSE	FALSE	0.0683124	57	0	2	55	G	synonymous_variant	LOW	Y70C5A.2	WBGene00013490	transcript	Y70C5A.2	protein_coding
V	16622569	C	[T]	{C, T}	0.0701754	1	TRUE	FALSE	TRUE	0.131657	57	0	4	53	T	synonymous_variant	LOW	Y70C5A.2	WBGene00013490	transcript	Y70C5A.2	protein_coding
V	16622575	A	[T, G]	{G, A, T}	0.122807	1	TRUE	FALSE	FALSE	0.217358	57	0	7	50	G	splice_region_variant&synonymous_variant	LOW	Y70C5A.2	WBGene00013490	transcript	Y70C5A.2	protein_coding
V	16622584	C	[A, T, G]	{A, C, T}	0.122807	1	TRUE	FALSE	FALSE	0.217358	57	0	7	50	A	splice_region_variant&intron_variant	LOW	Y70C5A.2	WBGene00013490	transcript	Y70C5A.2	protein_coding
V	16622634	C	[A]	{A, C}	0.0526316	1	TRUE	FALSE	FALSE	0.100605	57	0	3	54	A	splice_region_variant&intron_variant	LOW	Y70C5A.2	WBGene00013490	transcript	Y70C5A.2	protein_coding
V	16622636	C	[T]	{C, T}	0.0526316	1	TRUE	FALSE	TRUE	0.100605	57	0	3	54	T	splice_region_variant&intron_variant	LOW	Y70C5A.2	WBGene00013490	transcript	Y70C5A.2	protein_coding
[truncated: 2,582 more rows]
[truncated: 10 more columns]

## Sheet: Modified
CHROM	POS	REF	ALT	allele_set	aaf	call_rate	is_snp	is_indel	is_transition	nucl_diversity	num_called	num_het	num_hom_alt	num_hom_ref	ANN	Mutation type	Impact	Gene name	WBGene ID	Transcript?	Gene ID	Gene Type
[truncated: 6,075 more rows]
[truncated: 10 more columns]

[truncated: 1 more sheets: other]
